# Supplementary material for: TMT labeled comparative proteomic analysis reveals spleen active immune responses during Clostridium perfringens type C infected piglet diarrhea
Source: PeerJ journal article supplement (doi:10.7717/peerj.13006), 2022-04-04
Supplement: Figure_S1.pdf [file Figure_S1.pdf]

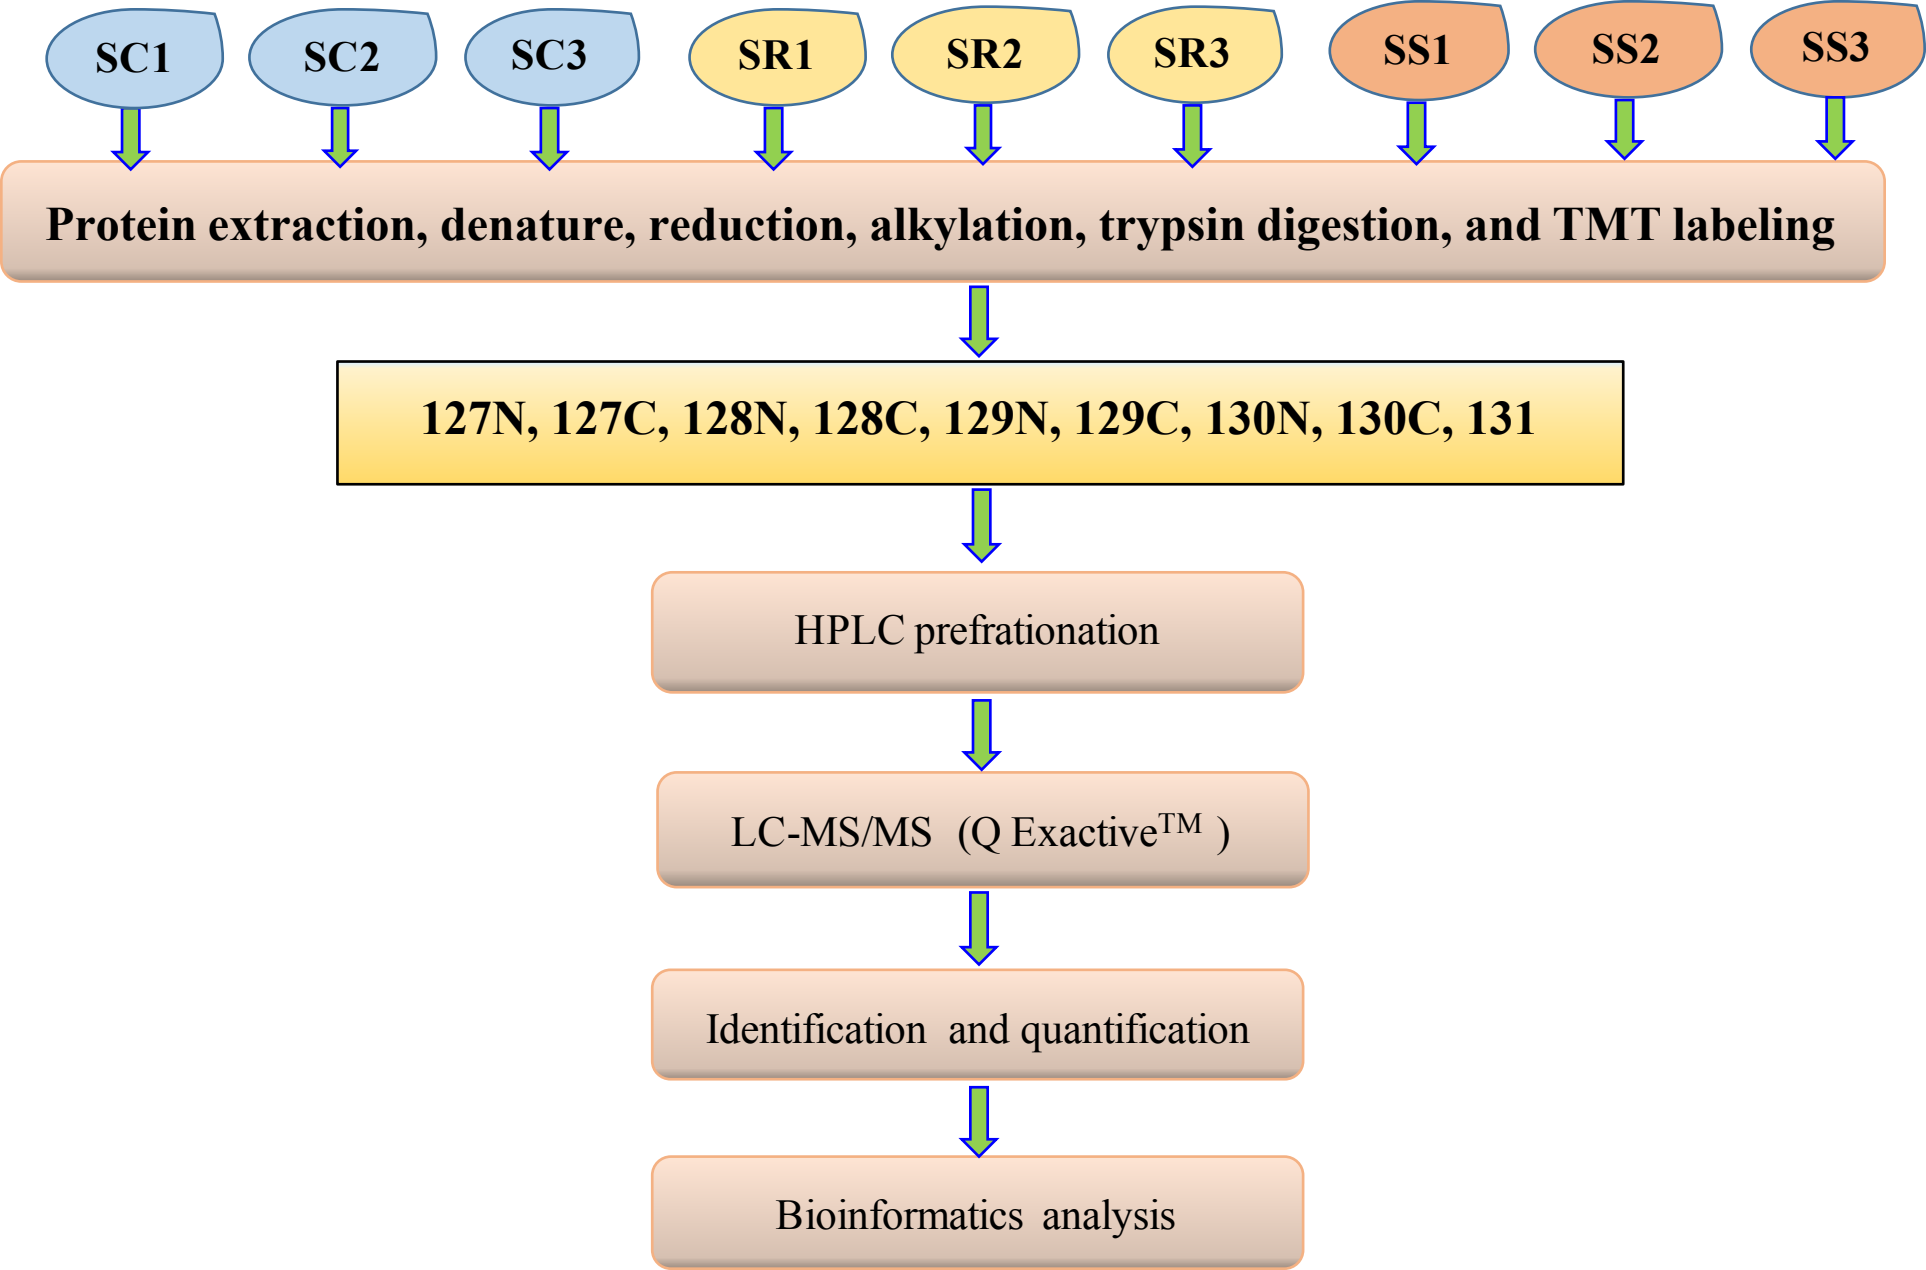

SC1

SC2

SC3

SR1

SR2

SR3

SS1

SS2

SS3

**Protein extraction, denature, reduction, alkylation, trypsin digestion, and TMT labeling**

**127N, 127C, 128N, 128C, 129N, 129C, 130N, 130C, 131**

HPLC prefractionation

LC-MS/MS (Q Exactive™)

Identification and quantification

Bioinformatics analysis
