# Supplementary material for: TMT labeled comparative proteomic analysis reveals spleen active immune responses during Clostridium perfringens type C infected piglet diarrhea
Source: PeerJ. 2022 Apr 4;10:e13006. doi: 10.7717/peerj.13006 (PMC8988937; doi:10.7717/peerj.13006)
Supplement: Supplemental Information 4 — Table S1: The identified information of global proteome of SS, SR and SC groups by TMT. Table S2: The statistics of the i d en tified differential expressed proteins. Table S3: The annotation of uncharacterized proteins identified according to bioinformatics comparison results . Table S4: GO functional cat e g o ries of the DEPs among SS, SR and SC groups. Table S 5 : Protein functional domains of DEPs identified among SS, SR and SC groups . Table S6: KEGG signal pathway enrichment categories of the DEPs among SS, SR and SC groups. Table S7: PPI interaction network of the DEPs among SR, SS and SC groups. [file peerj-10-13006-s004.xls]

## Sheet: Table S1
Protein accession	Protein description	Gene name	MW [kDa]	Coverage [%]	Peptides	PSMs	Unique peptides	SC_1	SC_2	SC_3	SR_1	SR_2	SR_3	SS_1	SS_2	SS_3	SR/SC Ratio	SR/SC P value	SS/SC Ratio	SS/SC P value	SS/SR Ratio	SS/SR P value
A0A023PN04	Peptidylprolyl isomerase OS=Sus scrofa OX=9823 GN=FKBP5	FKBP5	51.207	46.8	25	52	25	0.899	0.913	0.932	1.021	1.04	1.03	1.049	1.063	1.071	1.126	0.00052363	1.16	0.00025571	1.03	0.02212
A0A075B7I5	Uncharacterized protein OS=Sus scrofa OX=9823	---	11.866	17.7	3	7	3	1.104	1.121	1.136	0.949	0.899	0.925	0.974	0.957	0.949	0.825	0.00040195	0.857	0.000161926	1.039	0.094175
A0A0A0MY60	Signal transducer and activator of transcription OS=Sus scrofa OX=9823 GN=STAT5A	STAT5A	91.004	24.5	19	29	19	1.037	1.034	1.016	1.084	1.004	1.017	0.972	0.951	1.002	1.006	0.83996	0.948	0.030204	0.942	0.102377
A0A0D5BWD2	Mitochondrial complement component 1 Q subcomponent-binding protein OS=Sus scrofa OX=9823 GN=C1QBP	C1QBP	31.015	12.1	3	5	3	0.886	1.038	0.991	0.956	0.97	1.012	1	1.085	1.023	1.008	0.85488	1.066	0.28218	1.058	0.132743
A0A0E3KLW5	Nucleoside diphosphate linked moiety X-type motif 3 OS=Sus scrofa OX=9823 GN=NUDT3	NUDT3	19.451	22.7	3	3	3	0.947	1.097		0.897	0.782	1.078	1.107	1.246	0.902	0.899	0.45758	1.062	0.71436	1.181	0.27852
A0A0H5ANC0	Mimecan precursor OS=Sus scrofa OX=9823 GN=OGN	OGN	33.986	9.7	3	4	3	1.14	1.078	1.074	0.851	0.808	0.845	1.058	1.073	1.094	0.761	0.00040488	0.98	0.40072	1.288	0.000179948
A0A0K1SB73	LEM domain containing 3 OS=Sus scrofa OX=9823 GN=LEMD3	LEMD3	100.36	7	6	6	6	1.058	1.186	0.977	1.03	1.034	1.037	1.045	0.955	0.691	0.963	0.59954	0.835	0.23588	0.868	0.33776
A0A0R4J8D6	39S ribosomal protein L49, mitochondrial OS=Sus scrofa OX=9823 GN=MRPL49	MRPL49	18.904	12	2	3	2	1.154	1.076	1.111	0.98	1.062	1.046	0.759	1.056	0.782	0.924	0.068521	0.777	0.070522	0.841	0.164498
A0A0U2ETD0	Emerin OS=Sus scrofa OX=9823 GN=EMD	EMD	29.237	38.1	9	20	9	0.942	1.064	0.997	0.985	1.01	0.958	0.986	0.991	0.937	0.983	0.70176	0.97	0.501	0.987	0.59986
A0A165DE67	CRIP2 OS=Sus scrofa OX=9823 GN=CRIP2	CRIP2	22.63	26.9	4	14	4	1.126	1.112	1.093	0.886	0.947	0.969	0.95	0.998	0.946	0.841	0.0035381	0.869	0.00184245	1.033	0.36262
A0A173G6G4	Septin 4 OS=Sus scrofa OX=9823 GN=SEPT4	SEPT4	43.977	36.7	15	27	10	0.99	1.02	0.991	1.005	0.99	0.991	0.996	0.992	1.014	0.995	0.67466	1	0.97578	1.005	0.5566
A0A182B7B3	Transcription factor 3B OS=Sus scrofa OX=9823 GN=TCF3B	TCF3B	26.249	7.9	2	2	2	0.785	0.907	1.164	0.908	0.892	0.968	1.218	1.035	1.12	0.969	0.88272	1.181	0.22626	1.219	0.021042
A0A1L6ZA08	Lymphocyte antigen 6 complex locus G6F OS=Sus scrofa OX=9823 GN=ly6g6f	ly6g6f	32.651	6.7	2	2	2	1.154	1	1.009	0.939	0.926	1.011	1.009	0.98	0.996	0.909	0.156237	0.944	0.30148	1.038	0.25494
A0A1P0REP6	Spastin OS=Sus scrofa OX=9823 GN=SPAST	SPAST	67.599	3.7	2	2	2	1.072	1.047	1.04	1.037	0.98	1.035	0.968	0.927	0.909	0.966	0.168599	0.888	0.0044975	0.919	0.031978
A0A1Z1VUJ8	Methionine sulfoxide reductase B3 transcript variant 2 OS=Sus scrofa OX=9823 GN=MSRB3	MSRB3	19.931	9.3	2	4	2
A0A286ZFW3	Apolipoprotein H OS=Sus scrofa OX=9823 GN=APOH	APOH	38.275	43.5	12	24	12	1.119	1.094	1.117	0.907	0.928	0.88	0.927	1	0.949	0.815	0.00027738	0.864	0.0033575	1.059	0.102499
A0A286ZHZ8	Oxysterol-binding protein OS=Sus scrofa OX=9823 GN=OSBPL6	OSBPL6	98.592	1.4	1	1	1
A0A286ZI13	Bromodomain containing 9 OS=Sus scrofa OX=9823 GN=BRD9	BRD9	78.476	1.7	1	2	1	1.125	0.99	0.991	0.93	0.998	0.931	0.954	1.057	1.049	0.92	0.167418	0.985	0.8051	1.07	0.170564
A0A286ZI37	Surfeit 6 OS=Sus scrofa OX=9823 GN=SURF6	SURF6	39.282	6.1	2	2	2	1.212	1.115	0.916	0.923	1.004	0.969	0.985	1.019	0.887	0.893	0.28378	0.891	0.30252	0.998	0.95568
A0A286ZI46	Deltex E3 ubiquitin ligase 3 OS=Sus scrofa OX=9823 GN=DTX3	DTX3	37.245	13.1	3	3	3
A0A286ZI97	Peptidoglycan-recognition protein OS=Sus scrofa OX=9823 GN=PGLYRP1	PGLYRP1	24.187	27.9	4	5	4	0.919	1.039	0.979	1.164	1.137	1.06	0.9	1.022	0.887	1.144	0.040277	0.956	0.4727	0.836	0.027141
A0A286ZIA2	ER membrane protein complex subunit 4 OS=Sus scrofa OX=9823 GN=EMC4	EMC4	20.086	15.3	2	2	2	1.093	1.177	1.058	0.954	0.887	1.077	0.838	0.942	0.992	0.877	0.108056	0.833	0.035478	0.95	0.5395
A0A286ZIA8	Myotubularin related protein 1 OS=Sus scrofa OX=9823 GN=MTMR1	MTMR1	61.563	3.2	2	2	2
A0A286ZIC1	Gelsolin OS=Sus scrofa OX=9823 GN=GSN	GSN	80.782	39.7	27	31	9	1.044	1.018	1.022	0.951	0.969	0.995	0.999	0.982	0.998	0.945	0.020921	0.966	0.022719	1.022	0.199817
A0A286ZID0	Serine dehydratase like OS=Sus scrofa OX=9823 GN=SDSL	SDSL	35.485	3.6	1	1	1	0.874	0.776	0.85	1.125	1.141	1.153	0.91	1.015	1.174	1.368	0.00101588	1.24	0.062217	0.906	0.29678
A0A286ZID6	DAZ-associated protein 1 OS=Sus scrofa OX=9823 GN=DAZAP1	DAZAP1	40.691	20.6	6	8	6	0.916	1.039	1	1.078	1.029	1.022	1.013	0.932	0.996	1.059	0.22698	0.995	0.93346	0.94	0.110164
A0A286ZIE8	Solute carrier family 25 member 4 OS=Sus scrofa OX=9823 GN=SLC25A4	SLC25A4	33.026	38.6	12	34	3	0.974	0.968	0.978	0.977	0.98	0.996	1.031	1.072	1.045	1.011	0.168598	1.078	0.0031442	1.066	0.0077631
A0A286ZIH0	Hypoxia up-regulated 1 OS=Sus scrofa OX=9823 GN=HYOU1	HYOU1	109.79	32.5	26	41	26	0.993	0.994	0.959	1.015	0.978	1.001	1.054	1.01	1.046	1.016	0.3692	1.056	0.037339	1.039	0.089616
A0A286ZIH2	IQ motif and Sec7 domain 1 OS=Sus scrofa OX=9823 GN=IQSEC1	IQSEC1	104.95	5.4	5	5	5	1.134	1.038	1.052	1.029	0.97	0.946	0.962	0.925	0.962	0.913	0.071702	0.884	0.0156219	0.967	0.31016
A0A286ZIK8	Heat shock protein family A (Hsp70) member 4 like OS=Sus scrofa OX=9823 GN=HSPA4L	HSPA4L	89.662	13.2	10	16	7	1.084	1.038	1.007	0.97	0.969	0.976	0.959	1.036	0.983	0.932	0.081978	0.952	0.188037	1.022	0.45806
A0A286ZIK9	Phospholipid phosphatase 1 OS=Sus scrofa OX=9823 GN=PLPP1	PLPP1	32.321	11.9	3	5	3	1.054	1.04	0.978	0.957	0.969	0.979	1.027	1.027	1.069	0.946	0.081804	1.017	0.56216	1.075	0.0083372
A0A286ZIL3	LRRN4 C-terminal like OS=Sus scrofa OX=9823 GN=LRRN4CL	LRRN4CL	23.646	9.7	1	2	1
A0A286ZIL5	N-acetylglucosamine-6-phosphate deacetylase OS=Sus scrofa OX=9823 GN=AMDHD2	AMDHD2	40.106	13.9	5	6	5	1.1	1.025	1.262	1.032	0.959	1.016	0.787	0.984	0.99	0.888	0.14968	0.815	0.101022	0.918	0.31484
A0A286ZIL9	Collagen type XVIII alpha 1 chain OS=Sus scrofa OX=9823 GN=COL18A1	COL18A1	129.88	11.4	12	19	12	0.966	0.983	0.917	0.99	0.984	0.984	1.057	1.108	1.042	1.032	0.26634	1.119	0.0157585	1.084	0.0498
A0A286ZIN0	Heterogeneous nuclear ribonucleoprotein D OS=Sus scrofa OX=9823 GN=HNRNPD	HNRNPD	32.785	40.8	12	31	2	1.143	1.189	1.215	0.921	0.939	0.978	0.918	0.879	0.889	0.8	0.00089737	0.757	0.0002353	0.946	0.066757
A0A286ZIP7	CKLF like MARVEL transmembrane domain containing 4 OS=Sus scrofa OX=9823 GN=CMTM4	CMTM4	22.877	4.8	1	2	1
A0A286ZIQ0	Pre-mRNA processing factor 4B OS=Sus scrofa OX=9823 GN=PRPF4B	PRPF4B	118.48	7.1	7	13	7	1.041	0.972	1.074	0.966	1.029	0.966	1.024	1.019	0.992	0.959	0.31832	0.983	0.62928	1.025	0.34234
A0A286ZIQ2	N-ribosyldihydronicotinamide:quinone reductase 2 OS=Sus scrofa OX=9823 GN=NQO2	NQO2	22.339	33.5	7	9	7	1.09	0.96	0.941	1.039	1.024	1.028	1.013	0.963	0.884	1.033	0.5279	0.956	0.50754	0.925	0.186083
A0A286ZIR1	Uncharacterized protein OS=Sus scrofa OX=9823 GN=INF2	INF2	77.358	4.2	3	3	3
A0A286ZIT2	Solute carrier family 7 member 8 OS=Sus scrofa OX=9823 GN=SLC7A8	SLC7A8	57.872	4.3	3	4	3	0.797	0.904	0.87	1.109	0.972	1.089	1.166	1.02	1.083	1.233	0.0197585	1.271	0.011085	1.031	0.61352
A0A286ZIU2	Chloride intracellular channel protein OS=Sus scrofa OX=9823 GN=CLIC5	CLIC5	28.499	44.8	8	12	8	0.971	0.995	1.046	1.035	0.998	1.023	1.003	1.008	0.923	1.015	0.57496	0.974	0.5015	0.96	0.24614
A0A286ZIW3	SPG7, paraplegin matrix AAA peptidase subunit OS=Sus scrofa OX=9823 GN=SPG7	SPG7	71.291	2.9	2	2	2	1.105	0.954	1.072	0.923	1.076	1.026	0.936	0.929	0.996	0.966	0.61702	0.914	0.150337	0.946	0.34288
A0A286ZIW5	IlvB acetolactate synthase like OS=Sus scrofa OX=9823 GN=ILVBL	ILVBL	67.772	5.1	3	3	3	0.729	1.146	0.861	1.151	0.891	1.138	0.952	1.116	1.025	1.162	0.36028	1.13	0.37888	0.973	0.82056
A0A286ZJ07	Thioredoxin reductase 2, mitochondrial OS=Sus scrofa OX=9823 GN=TXNRD2	TXNRD2	46.539	2.6	1	1	1
A0A286ZJ23	Uncharacterized protein OS=Sus scrofa OX=9823	---	17.337	28.4	4	7	1	1.138	1.115	1.061	0.818	0.754	0.756	1.139	1.01	1.226	0.702	0.00047818	1.018	0.80942	1.45	0.004119
A0A286ZJ25	Mitochondrial ribosomal protein S7 OS=Sus scrofa OX=9823 GN=MRPS7	MRPS7	28.098	14.9	3	5	3	0.998	0.929	1.037	1.043	1.039	1.059	1.02	1.029	0.935	1.06	0.145985	1.007	0.88522	0.95	0.169003
A0A286ZJ45	EGF-containing fibulin-like extracellular matrix protein 1 precursor OS=Sus scrofa OX=9823 GN=EFEMP1	EFEMP1	50.393	29.3	12	24	12	1.141	1.089	1.11	0.954	0.927	0.996	0.926	0.892	0.938	0.861	0.0038594	0.825	0.00068465	0.958	0.172058
A0A286ZJ59	Tubulointerstitial nephritis antigen like 1 OS=Sus scrofa OX=9823 GN=TINAGL1	TINAGL1	47.572	17.3	6	12	6	0.907	0.964	0.886	0.982	0.961	0.98	1.035	1.107	1.079	1.06	0.086204	1.168	0.0081198	1.102	0.0096045
A0A286ZJ75	Microtubule-associated protein OS=Sus scrofa OX=9823 GN=MAPT	MAPT	39.089	5.3	2	2	2
A0A286ZJ89	Uncharacterized protein OS=Sus scrofa OX=9823 GN=LOC100514282	LOC100514282	19.136	5.8	1	1	1	0.908	1.123	1.058	0.951	1.046	1.003	0.925	1.037	0.955	0.971	0.72506	0.944	0.49034	0.972	0.55116
A0A286ZJ91	Vasodilator stimulated phosphoprotein OS=Sus scrofa OX=9823 GN=VASP	VASP	38.563	47.4	18	53	1	0.933	1.072	0.909	1.023	1.012	1.124	0.933	1.024	0.984	1.084	0.24932	1.009	0.85648	0.931	0.172518
A0A286ZJA6	TSC22 domain family member 1 OS=Sus scrofa OX=9823 GN=TSC22D1	TSC22D1	107.64	4.2	5	14	2	0.958	0.952	1.013	1.019	0.929	0.973	1.016	1.137	1.023	0.999	0.9773	1.087	0.118643	1.087	0.13964
A0A286ZJB5	TSC complex subunit 2 OS=Sus scrofa OX=9823 GN=TSC2	TSC2	190.94	1.8	3	3	3	1.176	0.799	1.092	1.031	0.909	1.01	1.065	0.9	1.043	0.962	0.83982	0.981	0.9499	1.02	0.79558
A0A286ZJD3	Spen family transcriptional repressor OS=Sus scrofa OX=9823 GN=SPEN	SPEN	345.82	0.9	2	2	2
A0A286ZJD8	Dipeptidyl peptidase 7 OS=Sus scrofa OX=9823 GN=DPP7	DPP7	55.562	9.9	4	7	4	1.03	0.947	1.069	0.989	0.937	0.958	1.026	1.081	0.983	0.947	0.24234	1.014	0.75864	1.071	0.096375
A0A286ZJI6	Kinesin-like protein OS=Sus scrofa OX=9823 GN=KIF2A	KIF2A	78.052	13.7	8	9	8	1.197	0.964	1.051	1.086	1.06	0.903	0.905	0.847	0.99	0.949	0.58024	0.854	0.113862	0.899	0.2265
A0A286ZJJ4	Mitochondrial calcium uniporter OS=Sus scrofa OX=9823 GN=MCU	MCU	35.946	12.3	3	5	3	0.983	0.981	0.996	0.984	0.983	1.022	0.993	1.02	1.038	1.01	0.52056	1.031	0.093301	1.021	0.32162
A0A286ZJK2	Heterogeneous nuclear ribonucleoprotein M OS=Sus scrofa OX=9823 GN=HNRNPM	HNRNPM	73.588	48	29	84	1
A0A286ZJL5	ATPase H+ transporting V1 subunit D OS=Sus scrofa OX=9823 GN=ATP6V1D	ATP6V1D	28.252	22.7	7	10	7	1.018	0.98	0.997	0.949	0.982	1.018	1.033	0.984	1.054	0.985	0.5316	1.025	0.34542	1.041	0.23142
A0A286ZJL8	DnaJ heat shock protein family (Hsp40) member C8 OS=Sus scrofa OX=9823 GN=DNAJC8	DNAJC8	29.822	12.6	5	7	5	1.047	1.072	1.013	1.039	0.986	0.986	0.933	0.973	0.969	0.961	0.175125	0.918	0.0155966	0.955	0.103998
A0A286ZJM4	DNA replication licensing factor MCM7 OS=Sus scrofa OX=9823 GN=MCM7	MCM7	81.325	20.4	13	15	13	1	0.982	1.02	1.084	1.023	0.991	0.976	0.954	1.003	1.032	0.33848	0.977	0.26806	0.947	0.144681
A0A286ZJM7	MAP7 domain containing 1 OS=Sus scrofa OX=9823 GN=MAP7D1	MAP7D1	90.155	14.9	11	14	11	0.935	0.991	1.015	0.999	0.954	1.011	0.997	1.013	0.963	1.008	0.80202	1.011	0.71548	1.003	0.89932
A0A286ZJN7	Family with sequence similarity 45 member A OS=Sus scrofa OX=9823 GN=FAM45A	FAM45A	40.582	13.4	5	8	5	0.958	0.931	1.022	0.969	0.973	1.008	0.99	1.032	1.014	1.013	0.66982	1.043	0.2293	1.029	0.173303
A0A286ZJR5	BMS1, ribosome biogenesis factor OS=Sus scrofa OX=9823 GN=BMS1	BMS1	141.75	1.1	1	1	1
A0A286ZJS1	Sorting nexin 8 OS=Sus scrofa OX=9823 GN=SNX8	SNX8	51.254	6	2	2	2	0.742	2.35	0.694	0.792	1.411	0.659	0.783	0.87	0.661	0.756	0.73578	0.611	0.46036	0.809	0.53664
A0A286ZJU5	Malignant T-cell-amplified sequence OS=Sus scrofa OX=9823 GN=LOC100738684	LOC100738684	20.546	26.5	5	7	5	0.94	0.979	0.968	1.008	0.946	0.995	1.05	1.079	1.086	1.021	0.40946	1.114	0.0024976	1.09	0.0168577
A0A286ZJW8	PHD finger protein 5A OS=Sus scrofa OX=9823 GN=PHF5A	PHF5A	12.405	62.7	8	11	8	1.068	1.058	1.022	1.035	0.997	1.003	1.011	0.946	0.929	0.964	0.108277	0.917	0.039378	0.951	0.145643
A0A286ZJX5	Stromal antigen 2 OS=Sus scrofa OX=9823 GN=STAG2	STAG2	141.29	11.7	15	17	11	0.986	0.97	1.011	1.02	1.008	1.025	0.988	1.019	0.997	1.029	0.092284	1.012	0.45672	0.984	0.194337
A0A286ZK05	2'-5'-oligoadenylate synthase 2 OS=Sus scrofa OX=9823 GN=OAS2	OAS2	78.006	25.3	15	21	15	0.889	0.907	0.925	1.132	1.142	1.14	0.964	0.94	0.934	1.255	4.13e-05	1.043	0.048182	0.831	5.536e-05
A0A286ZK33	Nicastrin OS=Sus scrofa OX=9823 GN=NCSTN	NCSTN	68.739	2.9	2	4	2	1	0.964	0.833	1.049	1.017	1.025	0.995	1.089	1.053	1.105	0.143021	1.122	0.130638	1.015	0.63872
A0A286ZK61	S1 RNA binding domain 1 OS=Sus scrofa OX=9823 GN=SRBD1	SRBD1	106.28	3.9	3	3	3	0.986	0.901	1.085	1.246	0.941	0.973	1.113	0.874	0.891	1.063	0.61622	0.968	0.72632	0.911	0.47994
A0A286ZK76	Ganglioside induced differentiation associated protein 2 OS=Sus scrofa OX=9823 GN=GDAP2	GDAP2	45.782	5.2	1	1	1	1.133	0.966	1.094	0.728	0.994	0.887	1.049	1.049	1.119	0.817	0.113897	1.008	0.8687	1.233	0.080883
A0A286ZK88	Dynactin subunit 5 OS=Sus scrofa OX=9823 GN=DCTN5	DCTN5	20.126	9.9	2	3	2	0.989	1.014	0.962	1.067	0.97	1.032	0.977	0.955	0.983	1.035	0.34602	0.983	0.3916	0.95	0.157817
A0A286ZK89	DNA mismatch repair protein Mlh1 OS=Sus scrofa OX=9823 GN=MLH1	MLH1	72.652	2.1	1	2	1	1.102	1.086	1.108	1.067	0.985	0.949	0.719	1.056	0.954	0.91	0.053784	0.828	0.22216	0.909	0.42474
A0A286ZK94	Interferon regulatory factor 4 OS=Sus scrofa OX=9823 GN=IRF4	IRF4	47.512	5.2	2	2	2	0.912	1.231	0.825	0.978	0.947	0.92	0.998	1.18	1.027	0.959	0.84026	1.08	0.5341	1.127	0.099556
A0A286ZK99	Raftlin family member 2 OS=Sus scrofa OX=9823 GN=RFTN2	RFTN2	55.635	11.4	4	4	3	0.8	1.071	0.998	1.061	1.059	1.056	0.984	0.999	0.973	1.107	0.34	1.03	0.71316	0.931	0.0007589
A0A286ZKA5	Complement C1q subcomponent subunit B precursor OS=Sus scrofa OX=9823 GN=C1QB	C1QB	26.174	19.5	4	11	4	0.939	0.962	0.993	1.008	0.959	0.991	1.025	0.974	1.081	1.022	0.37184	1.064	0.145539	1.041	0.30078
A0A286ZKE9	Uncharacterized protein OS=Sus scrofa OX=9823 GN=C13H21orf59	C13H21orf59	33.27	6.9	2	2	2	1.009	0.988	0.953	1.051	0.942	0.951	1.071	0.999	1.054	0.998	0.94208	1.059	0.100381	1.061	0.21498
A0A286ZKG1	Uncharacterized protein OS=Sus scrofa OX=9823 GN=EIF2B1	EIF2B1	33.873	27.9	8	9	8	0.959	0.997	0.944	1	1.025	0.984	1.057	0.979	1.016	1.038	0.13944	1.052	0.137502	1.014	0.61092
A0A286ZKH3	Uncharacterized protein OS=Sus scrofa OX=9823 GN=SPR	SPR	28.774	43.2	10	28	10	1.045	1.012	0.996	1.011	0.98	0.994	0.96	0.974	0.971	0.978	0.25194	0.952	0.028655	0.973	0.053824
A0A286ZKH8	Sorting nexin 12 OS=Sus scrofa OX=9823 GN=SNX12	SNX12	18.6	18.8	5	9	4	0.989	1.07	1.016	1.074	0.955	1.044	1.009	0.952	0.925	0.999	0.97596	0.939	0.13886	0.939	0.2273
A0A286ZKQ1	Beta-hexosaminidase OS=Sus scrofa OX=9823 GN=HEXB	HEXB	60.54	24.2	14	24	14	0.968	0.967	0.958	0.977	0.989	0.991	1.045	1.019	1.021	1.022	0.0168182	1.066	0.00182414	1.043	0.0101411
A0A286ZKQ9	Methyl-CpG binding domain protein 1 OS=Sus scrofa OX=9823 GN=MBD1	MBD1	59.398	3.9	2	3	2	1.166	1.35	1.215	0.966	0.973	1.131	0.758	0.747	0.699	0.823	0.043962	0.591	0.00047699	0.718	0.004497
A0A286ZKR5	LSM6 homolog, U6 small nuclear RNA and mRNA degradation associated OS=Sus scrofa OX=9823 GN=LSM6	LSM6	9.1275	35	4	6	4	1.093	0.965	1.011	1.017	0.991	1.033	0.975	0.976	0.936	0.991	0.84502	0.941	0.197497	0.949	0.047079
A0A286ZKS3	Engulfment and cell motility 2 OS=Sus scrofa OX=9823 GN=ELMO2	ELMO2	82.641	15.8	12	18	10	1.042	1.1	0.963	0.965	0.924	0.997	1.017	0.986	0.93	0.929	0.179959	0.945	0.29504	1.016	0.66552
A0A286ZKS9	Uncharacterized protein OS=Sus scrofa OX=9823 GN=SMARCAD1	SMARCAD1	96.679	1.2	1	1	1
A0A286ZKT3	Uncharacterized protein OS=Sus scrofa OX=9823 GN=TACC1	TACC1	80.847	14.8	9	10	9	0.891	0.928	1.007	1.024	0.985	0.995	1.022	1.099	1.062	1.063	0.175102	1.126	0.045163	1.06	0.074355
A0A286ZKT8	Uncharacterized protein OS=Sus scrofa OX=9823	---	10.782	11.2	1	2	1
A0A286ZKV4	Signal transducer and activator of transcription OS=Sus scrofa OX=9823 GN=STAT4	STAT4	83.649	6.2	4	5	3
A0A286ZKY8	Trafficking protein particle complex 4 OS=Sus scrofa OX=9823 GN=TRAPPC4	TRAPPC4	24.294	9.1	2	2	2	1.068	0.959	0.947	1.058	0.967	1.017	1.016	0.933	1.054	1.023	0.639	1.01	0.85996	0.987	0.77648
A0A286ZL07	BUB3, mitotic checkpoint protein OS=Sus scrofa OX=9823 GN=BUB3	BUB3	36.766	27.2	7	19	7	1.009	1.004	1.025	0.985	1.005	1.048	0.983	0.99	1.008	1	0.98852	0.981	0.123379	0.981	0.39784
A0A286ZL38	Uncharacterized protein OS=Sus scrofa OX=9823	---	40.882	2.2	1	1	1	0.942	1.038	0.978	0.853	0.874	0.966	1.144	1.158	1.062	0.91	0.116941	1.137	0.030215	1.249	0.0087782
A0A286ZL47	Cell adhesion molecule L1 like OS=Sus scrofa OX=9823 GN=CHL1	CHL1	129.24	2.3	2	2	2	1.072	0.935	1.191	0.903	0.959	0.847	1.057	0.998	1.05	0.847	0.108084	0.971	0.74752	1.146	0.026801
A0A286ZL51	Uncharacterized protein OS=Sus scrofa OX=9823 GN=RPL23A	RPL23A	17.435	33.3	6	26	6	1.055	1.057	0.984	1.008	1.057	1.047	0.949	0.946	0.917	1.005	0.85216	0.908	0.021038	0.904	0.0050767
A0A286ZL62	Ceramide synthase 4 OS=Sus scrofa OX=9823 GN=CERS4	CERS4	42.041	4.4	1	1	1	1.043	1	1.32	0.425	1.054	1.117	1.329	1.171	0.545	0.772	0.3573	0.905	0.60918	1.173	0.69606
A0A286ZL65	Ribosomal protein L15 OS=Sus scrofa OX=9823 GN=RPL15	RPL15	24.146	33.3	8	22	8	1.065	1.06	1.036	1.021	1.016	1.02	0.901	0.963	0.888	0.967	0.0182159	0.871	0.0061972	0.9	0.051638
A0A286ZL78	Zinc finger protein 276 OS=Sus scrofa OX=9823 GN=ZNF276	ZNF276	57.641	2.8	1	1	1
A0A286ZL94	Sulfide:quinone oxidoreductase, mitochondrial OS=Sus scrofa OX=9823 GN=SQOR	SQOR	47.565	43.4	18	28	18	0.938	0.912	0.937	0.964	1.014	0.97	1.044	1.098	1.1	1.058	0.038218	1.163	0.00147945	1.1	0.0152976
A0A286ZL98	Dynactin subunit 4 OS=Sus scrofa OX=9823 GN=DCTN4	DCTN4	52.032	12.6	5	7	5	1.102	1.019	0.949	0.955	1.03	0.938	0.93	1.013	1.019	0.952	0.40644	0.965	0.54208	1.013	0.76414
A0A286ZLA1	Eukaryotic translation initiation factor 4E binding protein 2 OS=Sus scrofa OX=9823 GN=EIF4EBP2	EIF4EBP2	12.965	37.5	2	3	2	1.504	1.576	0.768	1.153	0.917	0.945	0.648	0.754	0.775	0.784	0.45692	0.566	0.093501	0.722	0.023616
A0A286ZLA5	Nuclear receptor coactivator 2 OS=Sus scrofa OX=9823 GN=NCOA2	NCOA2	148.65	2.1	3	3	3	0.855	0.793	0.93	1.07	1.268	1.095	0.922	1.068	1.013	1.332	0.0153191	1.165	0.072178	0.875	0.124063
A0A286ZLA9	VPS39, HOPS complex subunit OS=Sus scrofa OX=9823 GN=VPS39	VPS39	92.947	8.3	6	7	6	0.977	0.998	1.002	0.974	1.021	1.048	0.989	1.002	1.013	1.022	0.39878	1.009	0.43632	0.987	0.60872
A0A286ZLB4	Bromodomain adjacent to zinc finger domain protein 1A OS=Sus scrofa OX=9823 GN=BAZ1A	BAZ1A	171.22	2.3	3	3	3	0.692	0.885	1.19	0.778	1.085	1.008	1.089	1.375	0.902	1.038	0.79548	1.216	0.35886	1.172	0.38552
A0A286ZLB6	Spindlin-1 OS=Sus scrofa OX=9823 GN=SPIN1	SPIN1	27.09	4.2	1	1	1
A0A286ZLE0	KIAA1468 OS=Sus scrofa OX=9823 GN=KIAA1468	KIAA1468	112.01	1.9	2	2	2	1.016	1.051	0.99	0.985	0.962	0.942	0.988	0.978	1.103	0.945	0.059263	1.004	0.95178	1.062	0.21924
A0A286ZLG1	Tescalcin OS=Sus scrofa OX=9823 GN=TESC	TESC	22.807	11.6	2	2	2
A0A286ZLH1	26S proteasome non-ATPase regulatory subunit 2 OS=Sus scrofa OX=9823 GN=PSMD2	PSMD2	97.966	22.2	21	38	21	1.039	1.018	0.98	1	1.022	0.995	0.994	0.998	0.98	0.993	0.7538	0.979	0.30072	0.985	0.20454
A0A286ZLH2	Glycolipid transfer protein OS=Sus scrofa OX=9823 GN=GLTP	GLTP	25.949	12.3	3	4	3
A0A286ZLH8	Uncharacterized protein OS=Sus scrofa OX=9823 GN=RPL35A	RPL35A	12.538	52.7	8	28	8	1.06	1.02	1.03	0.963	0.986	1.006	0.971	1.013	0.997	0.95	0.04034	0.959	0.06626	1.009	0.64562
A0A286ZLK7	Enoyl-CoA delta isomerase 1, mitochondrial OS=Sus scrofa OX=9823 GN=ECI1	ECI1	33.147	24.5	7	16	7	1.061	1.033	0.986	1.008	1.042	0.988	0.994	0.963	0.954	0.986	0.6363	0.945	0.086037	0.958	0.098662
A0A286ZLN9	N(alpha)-acetyltransferase 16, NatA auxiliary subunit OS=Sus scrofa OX=9823 GN=NAA16	NAA16	93.433	6.1	5	7	2	0.99	0.977	1.026	1.079	1.074	1.006	1.099	0.832	0.921	1.055	0.11696	0.953	0.54396	0.903	0.26832
A0A286ZLP7	Uncharacterized protein OS=Sus scrofa OX=9823 GN=PSMD9	PSMD9	24.416	29.1	5	7	5	1.051	1.037	0.888	1.055	1.046	1.014	0.964	0.822	0.864	1.047	0.43186	0.89	0.182799	0.851	0.02802
A0A286ZLQ0	Tripartite motif containing 23 OS=Sus scrofa OX=9823 GN=TRIM23	TRIM23	53.658	3.5	2	3	2
A0A286ZLQ7	Arachidonate 15-lipoxygenase OS=Sus scrofa OX=9823 GN=ALOX15	ALOX15	74.08	4.6	3	4	3	1.294	1.207	1.256	0.927	0.883	0.864	0.871	0.81	0.904	0.712	0.00030064	0.688	0.00059799	0.967	0.42006
A0A286ZLS2	TM2 domain-containing protein 2 precursor OS=Sus scrofa OX=9823 GN=TM2D2	TM2D2	20.277	5.8	1	1	1
A0A286ZLS9	Sorting nexin 18 OS=Sus scrofa OX=9823 GN=SNX18	SNX18	83.88	15.8	12	19	12	0.937	0.893	1.019	1.019	1.001	1.048	1.019	1.044	1.067	1.077	0.138501	1.099	0.079537	1.02	0.34816
A0A286ZLT0	5'-nucleotidase, cytosolic II OS=Sus scrofa OX=9823 GN=NT5C2	NT5C2	65.112	17.3	9	16	9	1.251	1.056	0.984	0.916	0.961	1.024	0.953	0.806	0.882	0.881	0.193678	0.802	0.065202	0.91	0.177164
A0A286ZLT7	Rho GTPase activating protein 12 OS=Sus scrofa OX=9823 GN=ARHGAP12	ARHGAP12	91.639	2.4	2	3	2
A0A286ZLV3	Threonine synthase like 1 OS=Sus scrofa OX=9823 GN=THNSL1	THNSL1	85.06	1.1	1	1	1	0.941	0.877	0.915	0.962	1.015	0.953	1.157	1.09	1.106	1.072	0.070079	1.227	0.00168062	1.144	0.0071221
A0A286ZLV5	Coactivator associated arginine methyltransferase 1 OS=Sus scrofa OX=9823 GN=CARM1	CARM1	63.37	11.8	7	11	7	1.037	0.985	1.003	0.985	0.985	1.004	0.985	0.993	0.98	0.983	0.36202	0.978	0.22676	0.995	0.51022
A0A286ZLY9	E3 ubiquitin-protein ligase HACE1 OS=Sus scrofa OX=9823 GN=HACE1	HACE1	97.305	3.9	3	3	3
A0A286ZLZ0	cAMP-dependent protein kinase catalytic subunit beta OS=Sus scrofa OX=9823 GN=PRKACB	PRKACB	46.195	18.9	9	21	1	1.131	1.142	1.027	0.976	1.146	0.922	0.893	0.952	0.827	0.922	0.31672	0.81	0.0161788	0.878	0.17164
A0A286ZM02	Component of oligomeric golgi complex 1 OS=Sus scrofa OX=9823 GN=COG1	COG1	88.295	3.9	3	3	3	1.009	1.034	1.155	0.94	0.928	0.914	1.036	0.954	1.038	0.87	0.031362	0.947	0.34392	1.088	0.044096
A0A286ZM16	Uncharacterized protein OS=Sus scrofa OX=9823 GN=FLCN	FLCN	63.919	4.5	2	2	2
A0A286ZM17	RAS protein activator like 2 OS=Sus scrofa OX=9823 GN=RASAL2	RASAL2	125.55	5.7	6	6	6	1.027	0.981	0.895	1.12	0.981	1.022	0.993	1.007	0.998	1.076	0.26384	1.033	0.4931	0.96	0.4233
A0A286ZM27	DEAD-box helicase 5 OS=Sus scrofa OX=9823 GN=DDX5	DDX5	68.88	30.3	20	47	12	0.981	0.991	0.97	1.026	1.043	1.039	0.988	0.955	0.964	1.056	0.0022825	0.988	0.36802	0.935	0.0040412
A0A286ZM39	Xyloside xylosyltransferase 1 OS=Sus scrofa OX=9823 GN=XXYLT1	XXYLT1	43.818	5.6	2	2	2
A0A286ZM70	AHNAK nucleoprotein OS=Sus scrofa OX=9823 GN=AHNAK	AHNAK	377.68	54.5	89	178	34	1.043	1.029	1.029	0.97	0.922	0.96	1.035	1.006	1.018	0.92	0.006497	0.986	0.21884	1.073	0.0160629
A0A286ZM82	Calumenin OS=Sus scrofa OX=9823 GN=CALU	CALU	37.113	44.8	13	26	2	0.94	0.982	0.999	0.964	0.921	0.972	1.052	1.094	1.091	0.978	0.42108	1.108	0.009596	1.133	0.0039809
A0A286ZMA3	Sorting nexin 29 OS=Sus scrofa OX=9823 GN=SNX29	SNX29	90.697	4.8	3	3	3	0.96	1.082	1.093	0.883	1.018	1.043	0.964	0.895	1.063	0.939	0.39224	0.932	0.33486	0.993	0.9237
A0A286ZMB2	Gamma-glutamyl hydrolase OS=Sus scrofa OX=9823 GN=GGH	GGH	35.428	6.3	2	3	2
A0A286ZMB4	VPS37A, ESCRT-I subunit OS=Sus scrofa OX=9823 GN=VPS37A	VPS37A	41.361	5.3	1	1	1
A0A286ZMB6	Family with sequence similarity 91 member A1 OS=Sus scrofa OX=9823 GN=FAM91A1	FAM91A1	84.581	8.4	6	7	6	1.038	1.087	0.966	1.062	1.011	0.984	1.017	0.979	1.006	0.989	0.8123	0.971	0.47942	0.982	0.51674
A0A286ZMF8	N-acetylated alpha-linked acidic dipeptidase 2 OS=Sus scrofa OX=9823 GN=NAALAD2	NAALAD2	78.747	5.1	3	4	3	1.143	1.03	1.068	0.766	0.942	1.001	0.968	1.067	1.039	0.836	0.09964	0.948	0.27836	1.135	0.199863
A0A286ZMH0	Transcription factor 25 OS=Sus scrofa OX=9823 GN=TCF25	TCF25	78.777	2.4	2	2	2	0.92	1.03	0.906	1.089	1.066	0.965	0.96	1.08	0.998	1.092	0.182036	1.064	0.30756	0.974	0.63034
A0A286ZMK5	Protein tyrosine phosphatase, receptor type M OS=Sus scrofa OX=9823 GN=PTPRM	PTPRM	163.82	1.9	3	3	3
A0A286ZML5	Uncharacterized protein OS=Sus scrofa OX=9823 GN=EXOC3L2	EXOC3L2	75.895	1.6	1	1	1
A0A286ZML8	Nuclear receptor coactivator 3 OS=Sus scrofa OX=9823 GN=NCOA3	NCOA3	143.83	3.1	3	4	3
A0A286ZMN8	Ankyrin repeat and SOCS box containing 5 OS=Sus scrofa OX=9823 GN=ASB5	ASB5	33.47	3.3	1	2	1	0.938	0.827	1.013	1.009	1.001	1.085	0.991	1.019	1.135	1.114	0.160522	1.132	0.156202	1.016	0.77392
A0A286ZMQ7	RAB12, member RAS oncogene family OS=Sus scrofa OX=9823 GN=RAB12	RAB12	27.304	29.9	6	11	6	0.981	1.054	0.944	0.998	0.971	1.007	0.996	1.014	1.072	0.999	0.99828	1.035	0.42748	1.036	0.23356
A0A286ZMR4	Mitochondrial ribosomal protein L11 OS=Sus scrofa OX=9823 GN=MRPL11	MRPL11	17.084	18.8	2	3	2	1.032	1.055	1.052	1.008	0.978	1.029	0.998	0.947	0.914	0.96	0.068022	0.911	0.023717	0.948	0.14356
A0A286ZMT3	Ring finger protein 214 OS=Sus scrofa OX=9823 GN=RNF214	RNF214	72.996	4.6	3	3	3	1.207	0.969	1.018	1.013	0.824	0.732	1.048	1.091	1.131	0.804	0.127519	1.024	0.71446	1.273	0.062341
A0A286ZMV3	UBA domain containing 1 OS=Sus scrofa OX=9823 GN=UBAC1	UBAC1	45.01	9.4	3	4	3	1.129	0.964	1.043	1.044	0.986	0.865	0.882	0.933	1.174	0.923	0.32362	0.953	0.61478	1.032	0.8061
A0A286ZMW0	Endoplasmic reticulum resident protein 44 precursor OS=Sus scrofa OX=9823 GN=ERP44	ERP44	40.002	39.8	12	24	12	1.124	1.009	0.993	0.956	1.006	0.985	0.965	1.007	0.918	0.943	0.23834	0.925	0.175284	0.981	0.548
A0A286ZMW4	Heat shock protein 105 kDa OS=Sus scrofa OX=9823 GN=HSPH1	HSPH1	91.952	35.3	28	46	26	0.855	0.833	0.832	1.005	0.995	1.008	1.114	1.182	1.165	1.194	5.6737e-05	1.373	9.5617e-05	1.151	0.00155826
A0A286ZMY6	Fas associated factor family member 2 OS=Sus scrofa OX=9823 GN=FAF2	FAF2	49.447	8.2	3	3	3	0.94	0.907	0.928	1.001	1.085	0.891	1.218	0.986	1.051	1.073	0.31244	1.173	0.070135	1.093	0.35508
A0A286ZMZ2	Cleavage and polyadenylation specificity factor subunit 6 OS=Sus scrofa OX=9823 GN=CPSF6	CPSF6	57.726	21.8	11	21	11	1.023	1.036	1.062	0.963	0.932	0.989	1.007	0.931	0.998	0.924	0.0177963	0.941	0.085639	1.018	0.59176
A0A286ZN07	Charged multivesicular body protein 4A OS=Sus scrofa OX=9823 GN=CHMP4A	CHMP4A	25.13	19.4	4	4	4
A0A286ZN11	Trinucleotide repeat containing 6B OS=Sus scrofa OX=9823 GN=TNRC6B	TNRC6B	183.35	3.8	5	5	5	0.979	0.983	0.949	0.942	0.997	0.945	1.147	1.062	1.012	0.991	0.68036	1.106	0.058636	1.117	0.055161
A0A286ZN35	Serine hydroxymethyltransferase OS=Sus scrofa OX=9823 GN=SHMT1	SHMT1	52.948	8.9	4	5	4	1.086	1.116	1.065	1.02	0.902	0.962	0.865	0.901	0.88	0.883	0.02968	0.81	0.00030179	0.917	0.085559
A0A286ZN43	Ras-GEF domain-containing family member 1B OS=Sus scrofa OX=9823 GN=RASGEF1B	RASGEF1B	54.972	2.3	1	2	1
A0A286ZN52	Proteasome subunit beta type OS=Sus scrofa OX=9823 GN=PSMB3	PSMB3	23.008	21	8	17	8	1.044	1.028	1.033	1.028	1.02	1.028	0.972	0.97	0.97	0.991	0.148937	0.938	0.0051235	0.947	3.7243e-05
A0A286ZN56	Translocation protein SEC62 OS=Sus scrofa OX=9823 GN=SEC62	SEC62	45.737	15.6	7	8	7	1.079	1.084	1.001	0.871	1.002	1.03	1.091	0.982	0.997	0.918	0.20332	0.97	0.5047	1.058	0.40232
A0A286ZN89	Uncharacterized protein OS=Sus scrofa OX=9823	---	16.479	11.3	1	2	1	1.234	0.853	1.002	0.864	1.039	1.003	0.953	1.182	0.909	0.941	0.68526	0.985	0.94482	1.047	0.68628
A0A286ZN94	Transmembrane and coiled-coil domains protein 1 OS=Sus scrofa OX=9823 GN=TMCC1	TMCC1	51.294	3.9	2	2	2	0.903	0.934	0.953	1.005	1.002	1.007	1.091	1.06	1.059	1.08	0.039116	1.151	0.00162061	1.065	0.023776
A0A286ZNB3	Uncharacterized protein OS=Sus scrofa OX=9823 GN=MRPS21	MRPS21	10.661	16.1	1	1	1	0.978	1.014	0.965	1.013	0.945	1.013	0.978	1.036	1.075	1.005	0.88028	1.045	0.23946	1.04	0.3422
A0A286ZND6	Free fatty acid receptor 2 OS=Sus scrofa OX=9823 GN=FFAR2	FFAR2	39.329	4.5	1	1	1	0.887	0.942	0.906	0.995	1.13	1.059	0.953	1.114	1.03	1.164	0.020724	1.132	0.064418	0.973	0.65092
A0A286ZNE6	Nebulette OS=Sus scrofa OX=9823 GN=NEBL	NEBL	31.15	45.9	13	23	12	0.954	0.968	0.903	0.959	0.99	1.014	1.069	1.048	1.082	1.049	0.146516	1.132	0.0057191	1.08	0.0146037
A0A286ZNG1	Ribosomal protein S6 kinase OS=Sus scrofa OX=9823 GN=RPS6KA1	RPS6KA1	82.743	29.1	18	25	11	0.956	0.975	0.995	1.001	1.013	0.986	1.028	1.038	1.019	1.025	0.146785	1.054	0.0140387	1.028	0.041736
A0A286ZNH2	Glutathione S-transferase mu 2 OS=Sus scrofa OX=9823 GN=LOC110260348	LOC110260348	25.591	56	12	30	0
A0A286ZNH3	Reactive intermediate imine deaminase A homolog OS=Sus scrofa OX=9823 GN=RIDA	RIDA	14.369	23.4	3	7	3	0.963	1.009	0.979	1.044	0.96	1.039	0.985	1.055	1.007	1.031	0.37788	1.033	0.26282	1.001	0.96384
A0A286ZNI3	Caveolae associated protein 1 OS=Sus scrofa OX=9823 GN=CAVIN1	CAVIN1	43.539	28.8	12	29	12	1.005	1.06	1.03	0.981	0.938	0.935	1.015	1.043	0.981	0.922	0.020642	0.982	0.47848	1.065	0.056161
A0A286ZNK4	Yes associated protein 1 OS=Sus scrofa OX=9823 GN=YAP1	YAP1	47.253	6.2	3	3	3	0.929	0.941	1.072	0.97	1.031	0.983	1.072	1.058	0.954	1.014	0.76266	1.048	0.46052	1.034	0.4818
A0A286ZNM8	Ubiquitin protein ligase E3 component n-recognin 2 OS=Sus scrofa OX=9823 GN=UBR2	UBR2	167.68	3.7	4	5	4
A0A286ZNN3	Hepatocyte growth factor-regulated tyrosine kinase substrate OS=Sus scrofa OX=9823 GN=HGS	HGS	84.021	15.8	12	18	12	1.04	1.017	0.994	0.971	0.993	1.005	0.983	0.994	1.008	0.973	0.174917	0.978	0.21924	1.005	0.68512
A0A286ZNN4	NADH dehydrogenase OS=Sus scrofa OX=9823 GN=NDUFS3	NDUFS3	30.201	29.5	7	19	6	1	1.017	1.008	1.034	1.032	0.964	0.984	0.954	0.988	1.002	0.96346	0.967	0.050755	0.966	0.24828
A0A286ZNQ7	Protein kinase cAMP-dependent type II regulatory subunit beta OS=Sus scrofa OX=9823 GN=PRKAR2B	PRKAR2B	46.221	32.4	11	20	9	1.015	0.985	0.99	0.997	1.009	1.006	0.984	1.011	0.98	1.007	0.49796	0.995	0.72736	0.988	0.29814
A0A286ZNU1	Zinc finger protein 687 OS=Sus scrofa OX=9823 GN=ZNF687	ZNF687	123.15	2.4	2	3	2	1.107	1.14	1.1	0.931	0.936	0.958	0.87	0.965	1.009	0.844	0.00027618	0.85	0.022017	1.007	0.9186
A0A286ZNU3	Cathepsin L1 Cathepsin L1 heavy chain Cathepsin L1 light chain OS=Sus scrofa OX=9823 GN=CTSV	CTSV	30.843	19.7	5	6	5	0.951	0.948	0.867	1.109	1.003	1.092	1.061	1.107	0.964	1.158	0.027883	1.132	0.072298	0.978	0.67268
A0A286ZNV5	4-trimethylaminobutyraldehyde dehydrogenase OS=Sus scrofa OX=9823 GN=ALDH9A1	ALDH9A1	53.941	41.5	21	76	21	0.961	0.954	0.94	1.035	1	1.041	1.021	0.996	1.022	1.077	0.0062159	1.064	0.0042206	0.988	0.47108
A0A286ZNW8	Uncharacterized protein OS=Sus scrofa OX=9823 GN=LOC100520491	LOC100520491	25.415	16.2	4	4	4
A0A286ZNW9	DIS3-like exonuclease 2 OS=Sus scrofa OX=9823 GN=DIS3L2	DIS3L2	95.199	13.1	12	15	12	1.058	1.041	0.928	1.049	1.011	1.075	0.932	0.94	0.987	1.036	0.46334	0.944	0.28288	0.912	0.021756
A0A286ZP05	Pericentriolar material 1 OS=Sus scrofa OX=9823 GN=PCM1	PCM1	230.7	0.5	1	1	1
A0A286ZP15	Alkylglycerone-phosphate synthase OS=Sus scrofa OX=9823 GN=AGPS	AGPS	63.989	20.1	8	12	3	1.018	0.908	1.094	0.951	1.018	0.951	0.978	1.064	1.034	0.967	0.62308	1.019	0.74616	1.053	0.196675
A0A286ZP30	FRY like transcription coactivator OS=Sus scrofa OX=9823 GN=FRYL	FRYL	335.13	2.4	8	8	7	0.941	0.946	0.906	0.984	0.964	0.944	1.024	1.018	1.122	1.035	0.12672	1.133	0.022519	1.094	0.057437
A0A286ZP34	HYDIN, axonemal central pair apparatus protein OS=Sus scrofa OX=9823 GN=HYDIN	HYDIN	565.21	0.2	1	1	1
A0A286ZP62	Coatomer protein complex subunit zeta 1 OS=Sus scrofa OX=9823 GN=COPZ1	COPZ1	20.198	22.6	3	10	3	1.024	1.074	0.956	0.992	1.09	0.989	0.87	0.994	1.075	1.006	0.90896	0.962	0.59134	0.957	0.5387
A0A286ZP69	RAB7A, member RAS oncogene family OS=Sus scrofa OX=9823 GN=RAB7A	RAB7A	23.54	68.1	12	34	12	0.987	0.999	1.029	1.002	1.004	0.992	1.02	1.02	1.014	0.994	0.6916	1.013	0.40854	1.019	0.0116953
A0A286ZP79	Src kinase associated phosphoprotein 2 OS=Sus scrofa OX=9823 GN=SKAP2	SKAP2	40.998	37.4	12	22	12	0.969	0.938	0.919	0.998	0.977	1.025	0.993	1.049	1.02	1.062	0.044918	1.084	0.022217	1.021	0.38754
A0A286ZP90	Cytoplasmic linker associated protein 1 OS=Sus scrofa OX=9823 GN=CLASP1	CLASP1	160.18	12	15	17	12	1.199	0.937	1.011	0.967	1.001	1.075	0.965	1.025	0.94	0.967	0.73134	0.931	0.43658	0.963	0.40508
A0A286ZP98	39S ribosomal protein L40, mitochondrial isoform 1 OS=Sus scrofa OX=9823 GN=MRPL40	MRPL40	24.031	6.8	1	1	1	1.129	1.062	1.103	1.098	0.942	0.981	0.878	0.84	0.983	0.917	0.146976	0.82	0.0161201	0.894	0.16236
A0A286ZPA0	Amine oxidase OS=Sus scrofa OX=9823 GN=LOC100520329	LOC100520329	81.654	15.4	11	20	3	0.99	0.997	0.959	1.054	1.101	1.106	0.967	0.918	0.935	1.107	0.0064423	0.957	0.08642	0.865	0.0025572
A0A286ZPA6	BCAR1, Cas family scaffolding protein OS=Sus scrofa OX=9823 GN=BCAR1	BCAR1	82.983	4.8	3	3	2
A0A286ZPE4	WAPL cohesin release factor OS=Sus scrofa OX=9823 GN=WAPL	WAPL	127.63	8.3	8	10	8
A0A286ZPF5	Mitogen-activated protein kinase OS=Sus scrofa OX=9823 GN=MAPK1	MAPK1	41.318	30.6	10	15	8	0.887	0.959	1.02	0.971	1.055	0.94	1.056	1.081	1.018	1.035	0.5484	1.101	0.091463	1.064	0.179424
A0A286ZPG2	Thymopoietin OS=Sus scrofa OX=9823 GN=TMPO	TMPO	37.009	45.6	13	43	2
A0A286ZPG8	Nuclear distribution protein nudE-like 1 OS=Sus scrofa OX=9823 GN=NDEL1	NDEL1	35.553	3.8	1	1	1	0.985	0.981	1.019	1.023	1.135	0.922	0.908	0.994	1.044	1.032	0.67234	0.987	0.74808	0.956	0.58934
A0A286ZPH4	Ubiquitin-conjugating enzyme E2 D2 OS=Sus scrofa OX=9823 GN=UBE2D2	UBE2D2	16.579	12.3	2	3	1
A0A286ZPH5	Autophagy-related protein 13 OS=Sus scrofa OX=9823 GN=ATG13	ATG13	48.758	2.2	1	1	1
A0A286ZPJ7	2-5A-dependent ribonuclease OS=Sus scrofa OX=9823 GN=RNASEL	RNASEL	84.041	4.6	3	3	3	1.075	0.834	0.888	0.891	1.158	1.122	0.966	1.157	0.942	1.134	0.32944	1.096	0.4047	0.967	0.77812
A0A286ZPL3	Receptor expression-enhancing protein OS=Sus scrofa OX=9823 GN=REEP3	REEP3	24.759	15.7	3	3	3
A0A286ZPL6	Galactose-3-O-sulfotransferase 2 OS=Sus scrofa OX=9823 GN=D2HGDH	D2HGDH	50.443	12.7	5	7	5	1.023	1.066	1.082	1.009	1.039	1.002	0.859	0.903	1.024	0.962	0.12634	0.879	0.074099	0.913	0.156183
A0A286ZPN8	Far upstream element binding protein 1 OS=Sus scrofa OX=9823 GN=FUBP1	FUBP1	69.85	44.4	26	52	1	0.952	0.956	0.969	1.048	1	1.133	1.028	0.926	1.001	1.106	0.114615	1.027	0.46268	0.929	0.20166
A0A286ZPQ1	Collagen type VI alpha 3 chain OS=Sus scrofa OX=9823 GN=COL6A3	COL6A3	231.95	29.2	59	132	0
A0A286ZPR1	AP-2 complex subunit mu OS=Sus scrofa OX=9823 GN=AP2M1	AP2M1	49.389	31.2	12	23	12	0.947	0.948	0.962	1.021	1.002	1.045	1.009	1.069	1.031	1.074	0.0056828	1.088	0.0087209	1.013	0.5615
A0A286ZPR5	Eukaryotic translation initiation factor 2A OS=Sus scrofa OX=9823 GN=EIF2A	EIF2A	60.859	20.1	10	13	10	1.021	1.045	1.027	1.014	0.973	1.038	0.966	0.942	1.024	0.978	0.326	0.948	0.103279	0.969	0.3689
A0A286ZPR8	Cytochrome b-c1 complex subunit 7 OS=Sus scrofa OX=9823 GN=UQCRB	UQCRB	13.563	27	4	6	4	1.117	1.088	1.038	0.975	0.964	0.984	0.935	0.943	0.977	0.901	0.0096791	0.88	0.0073803	0.977	0.18256
A0A286ZPT0	Coatomer subunit beta' OS=Sus scrofa OX=9823 GN=COPB2	COPB2	102.34	33	27	57	27	1.049	1.056	1.027	0.979	0.986	0.998	0.98	0.984	0.989	0.946	0.0053629	0.943	0.0026167	0.997	0.61716
A0A286ZPU3	5'-3' exoribonuclease OS=Sus scrofa OX=9823 GN=XRN2	XRN2	105.85	10.4	10	12	10	0.961	1.004	1.02	1.038	1.017	0.973	1.023	0.99	0.967	1.014	0.6141	0.998	0.94956	0.984	0.56144
A0A286ZPU9	ARVCF, delta catenin family member OS=Sus scrofa OX=9823 GN=ARVCF	ARVCF	93.528	17.1	12	13	12	0.978	0.988	0.98	0.973	0.917	0.943	1.034	1.05	1.067	0.962	0.086296	1.07	0.0021807	1.112	0.0053211
A0A286ZPX3	TRAF3 interacting protein 3 OS=Sus scrofa OX=9823 GN=TRAF3IP3	TRAF3IP3	59.529	11.7	6	8	6	1.058	1.165	1.081	1.046	1.182	1.088	0.809	0.779	0.797	1.004	0.94864	0.722	0.00047919	0.719	0.00095652
A0A286ZPY1	AHNAK nucleoprotein OS=Sus scrofa OX=9823 GN=AHNAK	AHNAK	129.46	63.7	43	105	3	0.98	0.991	1.051	0.981	0.924	1.067	0.982	0.969	1.068	0.983	0.72204	0.999	0.97082	1.016	0.76538
A0A286ZPY2	Glutathione S-transferase mu 2 OS=Sus scrofa OX=9823 GN=LOC110260348	LOC110260348	28.739	49.6	12	28	0
A0A286ZPZ8	Ecdysoneless cell cycle regulator OS=Sus scrofa OX=9823 GN=ECD	ECD	67.256	4.2	2	2	2
A0A286ZQ26	Multiple PDZ domain crumbs cell polarity complex component OS=Sus scrofa OX=9823 GN=MPDZ	MPDZ	212.23	2.2	4	4	4
A0A286ZQ28	SEC24 homolog C, COPII coat complex component OS=Sus scrofa OX=9823 GN=SEC24C	SEC24C	118.31	13.1	12	14	12	0.926	1.037	0.973	1.066	0.93	0.998	1.039	0.964	0.974	1.02	0.72846	1.014	0.73902	0.994	0.92334
A0A286ZQ31	Phosphoglycerate mutase OS=Sus scrofa OX=9823 GN=BPGM	BPGM	29.939	12.4	3	4	3	0.951	0.967	0.993	0.986	1.057	1.063	0.932	0.976	1.01	1.067	0.077363	1.002	0.94286	0.939	0.136575
A0A286ZQ40	40S ribosomal protein S26 OS=Sus scrofa OX=9823 GN=RPS26	RPS26	12.36	28.7	3	9	3	1.114	1.069	1.068	0.97	0.956	0.974	0.944	1.047	0.997	0.892	0.00160384	0.919	0.061402	1.03	0.39422
A0A286ZQ41	YTH domain containing 1 OS=Sus scrofa OX=9823 GN=YTHDC1	YTHDC1	80.455	3	2	2	2	1.01	0.948	1.067	0.982	1.048	0.85	1.06	0.952	1.092	0.952	0.5048	1.026	0.66402	1.078	0.36052
A0A286ZQ44	Dicarbonyl and L-xylulose reductase OS=Sus scrofa OX=9823 GN=DCXR	DCXR	25.661	62.7	12	17	12	1.006	0.996	0.999	1.025	0.989	0.965	0.991	1.03	1.03	0.993	0.68862	1.017	0.28282	1.024	0.33094
A0A286ZQ45	Rho guanine nucleotide exchange factor 1 OS=Sus scrofa OX=9823 GN=ARHGEF1	ARHGEF1	106.27	24.7	21	31	21	0.997	1.016	1.015	0.959	0.958	1.031	1.007	1.05	0.976	0.974	0.33686	1.002	0.95788	1.029	0.42548
A0A286ZQ65	Phosphatidylinositol-5-phosphate 4-kinase type 2 beta OS=Sus scrofa OX=9823 GN=PIP4K2B	PIP4K2B	47.336	16.1	8	18	2	0.891	1.059	0.98	0.954	1.092	1.03	1.048	1.071	0.883	1.05	0.47814	1.025	0.78408	0.976	0.73346
A0A286ZQ74	Vacuolar protein sorting-associated protein 41 homolog OS=Sus scrofa OX=9823 GN=VPS41	VPS41	91.024	5.2	4	5	4	0.858	0.96	0.972	1.03	1.095	1.005	1.088	1.058	0.943	1.122	0.069901	1.107	0.160997	0.987	0.78998
A0A286ZQ75	Myelin basic protein OS=Sus scrofa OX=9823 GN=MBP	MBP	20.531	5.7	1	1	1	1.115	1.031	1.111	0.989	0.899	1.008	1.054	0.879	0.928	0.889	0.053818	0.878	0.091124	0.988	0.84032
A0A286ZQ85	Collagen alpha-1(III) chain precursor OS=Sus scrofa OX=9823 GN=COL3A1	COL3A1	113.55	5.3	6	3	2	0.992	0.998	1.07	0.943	1.027	0.977	0.953	0.997	1.055	0.963	0.3387	0.982	0.6546	1.02	0.64306
A0A286ZQ89	RBR-type E3 ubiquitin transferase OS=Sus scrofa OX=9823 GN=RNF14	RNF14	19.78	6.4	2	2	2
A0A286ZQB1	Queuosine salvage protein OS=Sus scrofa OX=9823 GN=C9orf64	C9orf64	43.47	33	12	13	12	0.953	0.982	0.996	1.002	0.975	1.016	1.002	0.991	0.998	1.021	0.30358	1.02	0.20228	0.999	0.9681
A0A286ZQB6	Cyclin T1 OS=Sus scrofa OX=9823 GN=CCNT1	CCNT1	76.642	2.6	2	2	2	1.198	1.322	0.947	1.045	0.899	0.979	0.807	0.715	1.103	0.843	0.20614	0.757	0.153896	0.898	0.41878
A0A286ZQC1	SGT1 homolog, MIS12 kinetochore complex assembly cochaperone OS=Sus scrofa OX=9823 GN=SUGT1	SUGT1	38.29	46.9	13	20	13	0.997	1.009	0.988	0.984	0.98	0.976	1.065	1.036	0.948	0.982	0.049715	1.018	0.65782	1.037	0.42262
A0A286ZQE1	Cbl proto-oncogene OS=Sus scrofa OX=9823 GN=CBL	CBL	100.66	17.3	11	13	10	1.032	0.997	0.98	1	1.001	1.013	0.951	0.985	0.973	1.002	0.91102	0.967	0.140542	0.965	0.032804
A0A286ZQE5	Tripartite motif containing 24 OS=Sus scrofa OX=9823 GN=TRIM24	TRIM24	100.95	1.2	1	1	1
A0A286ZQE6	Uncharacterized protein OS=Sus scrofa OX=9823 GN=APOPT1	APOPT1	61.525	32.3	17	25	1	0.919	1.11	1.101	0.965	0.951	0.915	1.014	1.02	1.106	0.904	0.20238	1.003	0.93236	1.109	0.032885
A0A286ZQE9	Uncharacterized protein OS=Sus scrofa OX=9823 GN=DAP	DAP	11.09	15.7	2	6	2	0.935	1.035	1.104	0.938	1.031	0.964	1.043	1.041	0.96	0.954	0.46222	0.99	0.88946	1.038	0.39622
A0A286ZQF3	Family with sequence similarity 98 member A OS=Sus scrofa OX=9823 GN=FAM98A	FAM98A	46.195	5.1	3	5	2	1.01	0.998	1.052	1.006	0.991	1.1	1.051	0.936	0.87	1.012	0.7728	0.934	0.28046	0.923	0.26582
A0A286ZQF6	Uncharacterized protein OS=Sus scrofa OX=9823	---	44.409	11.7	3	13	1
A0A286ZQH4	Uncharacterized protein OS=Sus scrofa OX=9823 GN=SPN	SPN	47.662	16.8	4	4	4	1.027	1.013	1.01	1.054	1.048	1.078	0.944	0.803	1.032	1.043	0.0141987	0.911	0.31328	0.874	0.198721
A0A286ZQI6	Uncharacterized protein OS=Sus scrofa OX=9823	---	26.704	23.4	5	10	5	1.02	1.018	1.017	0.975	0.973	0.95	0.989	1.024	1.049	0.949	0.024262	1.002	0.91776	1.057	0.044899
A0A286ZQJ3	C2CD2 like OS=Sus scrofa OX=9823 GN=C2CD2L	C2CD2L	71.724	4.2	3	3	3	1.006	0.933	1.076	0.936	0.959	0.915	1.011	1.121	1.062	0.932	0.187242	1.059	0.31424	1.137	0.0177208
A0A286ZQK4	Uncharacterized protein OS=Sus scrofa OX=9823 GN=CELF2	CELF2	55.715	13.4	6	13	6	1.035	0.992	1.054	0.989	0.991	0.943	1.038	0.988	0.988	0.949	0.095535	0.978	0.41876	1.031	0.25542
A0A286ZQK8	tRNA methyltransferase 1 like OS=Sus scrofa OX=9823 GN=TRMT1L	TRMT1L	84.08	8.9	6	8	6	0.973	0.916	0.99	1.036	0.99	0.972	0.958	0.92	0.979	1.041	0.24946	0.992	0.8147	0.953	0.140982
A0A286ZQL4	Family with sequence similarity 169 member A OS=Sus scrofa OX=9823 GN=FAM169A	FAM169A	63.949	3.8	2	2	2	0.932	0.856	1.029	0.874	1.001	0.903	1.162	1.102	1.152	0.986	0.85802	1.213	0.024681	1.23	0.0091407
A0A286ZQL6	Zinc finger CCCH-type containing 7A OS=Sus scrofa OX=9823 GN=ZC3H7A	ZC3H7A	103.67	1.5	1	1	1
A0A286ZQM9	Rab interacting lysosomal protein like 2 OS=Sus scrofa OX=9823 GN=RILPL2	RILPL2	22.03	7.2	1	1	1
A0A286ZQP7	Myotubularin related protein 9 OS=Sus scrofa OX=9823 GN=MTMR9	MTMR9	63.552	7.5	3	3	3
A0A286ZQQ4	5'-AMP-activated protein kinase subunit beta-2 OS=Sus scrofa OX=9823 GN=PRKAB2	PRKAB2	21.435	6.3	1	1	1
A0A286ZQQ5	Tail-anchored protein insertion receptor WRB OS=Sus scrofa OX=9823 GN=WRB	WRB	19.91	12.1	2	2	2	0.964	0.962	1.029	0.884	1.008	0.947	1.158	1.007	1.049	0.961	0.40314	1.088	0.152998	1.132	0.092381
A0A286ZQQ7	1,5-anhydro-D-fructose reductase OS=Sus scrofa OX=9823 GN=AKR1E2	AKR1E2	33.127	5.7	3	6	1	0.904	0.825	0.857	0.984	1.034	1.063	1.108	1.16	1.088	1.191	0.0073191	1.298	0.00133502	1.089	0.044239
A0A286ZQQ9	Phospholipid-transporting ATPase OS=Sus scrofa OX=9823 GN=ATP11C	ATP11C	121.54	2.5	3	4	2	1.021	0.946	1.029	0.969	1.001	0.951	1.074	1.024	1	0.975	0.46372	1.034	0.37788	1.061	0.085402
A0A286ZQR2	DnaJ heat shock protein family (Hsp40) member C17 OS=Sus scrofa OX=9823 GN=DNAJC17	DNAJC17	27.665	7.7	2	2	2	0.929	0.927	0.96	1.15	0.988	1.031	1.009	0.931	1.089	1.125	0.067323	1.076	0.20268	0.956	0.51914
A0A286ZQR7	RAN binding protein 9 OS=Sus scrofa OX=9823 GN=RANBP9	RANBP9	60.634	2.6	1	1	1	1.126	1.01	0.984	1.065	0.919	1.029	1.058	0.948	0.885	0.966	0.5939	0.927	0.30938	0.96	0.5719
A0A286ZQS4	MIA family member 3, ER export factor OS=Sus scrofa OX=9823 GN=MIA3	MIA3	116.6	9.5	9	13	1	0.788	0.858	0.978	0.993	0.963	1.036	1.028	1.177	1.191	1.14	0.111863	1.294	0.029815	1.135	0.073242
A0A286ZQS7	Sec1 family domain containing 1 OS=Sus scrofa OX=9823 GN=SCFD1	SCFD1	69.824	29.3	13	19	13	1.069	1.04	0.996	1.044	1.05	0.978	0.988	0.961	0.912	0.989	0.7433	0.921	0.058444	0.931	0.095116
A0A286ZQV9	Uncharacterized protein OS=Sus scrofa OX=9823 GN=BABAM1	BABAM1	36.97	18.7	4	4	4	1.072	1.037	0.997	1.022	1.05	0.919	0.926	1.058	0.94	0.963	0.44286	0.941	0.25982	0.978	0.71666
A0A286ZQW2	Pyruvate dehydrogenase (acetyl-transferring) kinase isozyme 1, mitochondrial OS=Sus scrofa OX=9823 GN=PDK1	PDK1	45.062	7.5	2	2	2	1.134	1.214	1.116	0.889	1.008	0.882	0.922	0.905	0.94	0.802	0.0117006	0.799	0.0013239	0.996	0.95716
A0A286ZQW5	Surfeit 4 OS=Sus scrofa OX=9823 GN=SURF4	SURF4	30.422	6.7	2	2	2	0.912	0.949	0.917	1.021	1.032	1.044	1.058	1.056	1.026	1.115	0.00148046	1.13	0.00153725	1.014	0.31056
A0A286ZQX2	Proto-oncogene vav OS=Sus scrofa OX=9823 GN=VAV1	VAV1	98.251	30.2	27	55	27	0.963	0.948	0.998	1.016	1.005	1.017	1.042	1.033	1.016	1.044	0.049722	1.063	0.022804	1.017	0.107103
A0A286ZQX8	Acyl-coenzyme A oxidase OS=Sus scrofa OX=9823 GN=ACOX3	ACOX3	73.738	4.8	2	2	2
A0A286ZQY6	Isocitrate dehydrogenase [NAD] subunit, mitochondrial OS=Sus scrofa OX=9823 GN=IDH3A	IDH3A	39.65	29.5	11	22	11	0.997	1.01	1.012	1.01	1.005	1.012	1.032	1.045	0.96	1.003	0.63018	1.006	0.8539	1.003	0.9306
A0A286ZQY9	Ribulose-phosphate 3-epimerase OS=Sus scrofa OX=9823 GN=RPE	RPE	25.012	15.8	3	6	3	0.819	1.01	1.038	1.027	0.998	1.023	0.963	1.067	1.104	1.063	0.47016	1.093	0.33798	1.028	0.56632
A0A286ZQZ0	PDS5 cohesin associated factor A OS=Sus scrofa OX=9823 GN=PDS5A	PDS5A	147.46	18.2	20	26	19	0.999	1.086	0.991	1.089	1.044	1.005	0.916	1.007	0.939	1.02	0.61582	0.93	0.151761	0.912	0.065284
A0A286ZQZ1	Alpha-1,3-glucosyltransferase OS=Sus scrofa OX=9823 GN=ALG6	ALG6	55.787	1.9	1	1	1	0.838	0.984	1.008	1.03	0.902	1.008	1.118	1.06	1.059	1.039	0.60568	1.144	0.086341	1.101	0.095163
A0A286ZQZ8	Dual specificity phosphatase 23 OS=Sus scrofa OX=9823 GN=DUSP23	DUSP23	16.794	16	2	3	2	0.98	1.125	1.006	0.989	0.972	1.002	1.019	1.038	0.882	0.952	0.33788	0.945	0.43564	0.992	0.84824
A0A286ZQZ9	Pre-mRNA-splicing factor 18 OS=Sus scrofa OX=9823 GN=PRPF18	PRPF18	37.331	6.3	2	3	2	1.191	1.06	1.184	0.826	0.806	0.93	1.083	1.046	0.895	0.746	0.0072433	0.88	0.137422	1.18	0.088696
A0A286ZR16	Retinal degeneration 3 OS=Sus scrofa OX=9823 GN=RD3	RD3	22.48	4.1	1	1	1
A0A286ZR21	Neural precursor cell expressed, developmentally down-regulated 4-like, E3 ubiquitin protein ligase OS=Sus scrofa OX=9823 GN=NEDD4L	NEDD4L	130.1	5.6	5	6	4	1.11	1.004	1.028	1.033	0.969	0.993	0.954	1.022	0.912	0.953	0.254	0.919	0.132958	0.964	0.38376
A0A286ZR28	5'-AMP-activated protein kinase subunit gamma-1 OS=Sus scrofa OX=9823 GN=PRKAG1	PRKAG1	31.777	26.2	7	9	6	1.041	0.978	0.976	1.091	0.961	1.008	0.989	1.018	0.961	1.022	0.65494	0.991	0.75796	0.97	0.50834
A0A286ZR50	Uncharacterized protein OS=Sus scrofa OX=9823 GN=LOC110259662	LOC110259662	47.65	2.4	1	1	1	1.762	1.147	1.273	0.896	1.183	0.907	0.582	0.717	0.576	0.714	0.10626	0.448	0.0058792	0.628	0.0160561
A0A286ZR94	Myosin-11 OS=Sus scrofa OX=9823 GN=MYH11	MYH11	202.68	47.5	90	290	2	1.014	0.901	0.934	0.995	1.037	1.03	0.994	1.05	1.067	1.075	0.120864	1.092	0.09652	1.016	0.56664
A0A286ZRB3	Uncharacterized protein OS=Sus scrofa OX=9823	---	14.633	37.7	7	13	1	0.96	1.124	1.001	0.955	1.087	1.076	0.859	0.98	0.968	1.011	0.86744	0.91	0.21128	0.9	0.149976
A0A286ZRB7	6-phosphofructo-2-kinase/fructose-2,6-biphosphatase 4 OS=Sus scrofa OX=9823 GN=PFKFB4	PFKFB4	51.727	7.6	3	3	3	0.987	0.927	1.009	1.081	1.018	0.993	0.993	0.984	1.024	1.058	0.191237	1.027	0.39384	0.971	0.3523
A0A286ZRD1	Protein C-ets-1 OS=Sus scrofa OX=9823 GN=ETS1	ETS1	40.795	4.5	1	1	1	0.911	1.169	1.035	1.102	1.322	0.954	0.963	0.82	0.716	1.084	0.55054	0.802	0.117622	0.74	0.078337
A0A286ZRD4	Uncharacterized protein OS=Sus scrofa OX=9823 GN=TJP1	TJP1	195.21	19.9	27	35	27	1.049	0.975	1.028	0.99	0.986	1.025	0.976	0.966	0.976	0.983	0.5453	0.956	0.181796	0.972	0.09438
A0A286ZRE1	Tropomyosin alpha-1 chain OS=Sus scrofa OX=9823 GN=TPM1	TPM1	40.177	52.1	25	45	0
A0A286ZRG9	Malic enzyme OS=Sus scrofa OX=9823 GN=ME1	ME1	61.465	10.7	5	7	4	1.52	1.138	1.129	1.192	0.951	0.923	0.728	0.684	0.77	0.81	0.176357	0.576	0.0063587	0.712	0.0188381
A0A286ZRH9	Uncharacterized protein OS=Sus scrofa OX=9823 GN=CXADR	CXADR	37.141	19.5	6	9	6	1.004	1.017	1.013	1.079	0.961	0.955	0.9	1.005	0.988	0.987	0.75066	0.954	0.29334	0.966	0.54976
A0A286ZRI4	Unc-119 lipid binding chaperone B OS=Sus scrofa OX=9823 GN=UNC119B	UNC119B	23.957	17.3	3	3	3
A0A286ZRK0	Uncharacterized protein OS=Sus scrofa OX=9823 GN=LOC100622780	LOC100622780	50.564	41.9	16	50	4	0.821	0.871	0.913	1.076	0.922	1.03	1.128	1.083	1.093	1.162	0.054061	1.268	0.00196421	1.091	0.134278
A0A286ZRL1	ATP-dependent Clp protease proteolytic subunit OS=Sus scrofa OX=9823 GN=CLPP	CLPP	29.825	21.2	4	7	4	0.864	0.962	1.061	1.051	1.058	1.002	1.058	0.973	1.037	1.078	0.27536	1.063	0.37912	0.986	0.66456
A0A286ZRL3	Cytochrome P450, family 20, subfamily A, polypeptide 1 OS=Sus scrofa OX=9823 GN=NBEAL1	NBEAL1	356.55	4	11	15	11	1.02	0.966	1.019	0.982	0.975	0.944	1.038	1.06	0.98	0.965	0.181376	1.024	0.46612	1.061	0.089885
A0A286ZRM3	FLII, actin remodeling protein OS=Sus scrofa OX=9823 GN=FLII	FLII	142.18	14.3	17	28	17	0.888	0.895	0.957	1.019	0.981	0.969	1.1	1.066	1.105	1.084	0.045822	1.194	0.0025033	1.102	0.0068223
A0A286ZRN8	Spectrin beta chain OS=Sus scrofa OX=9823 GN=SPTBN2	SPTBN2	260.7	7.1	16	23	7	0.973	0.925	0.974	0.975	1.042	0.94	1.109	0.995	1.113	1.03	0.45618	1.12	0.05016	1.088	0.152624
A0A286ZRQ2	Impact RWD domain protein OS=Sus scrofa OX=9823 GN=IMPACT	IMPACT	33.7	14.1	3	3	3	1.114	1.067	0.993	0.92	1.116	0.938	0.99	0.945	0.932	0.937	0.38736	0.903	0.057375	0.964	0.63226
A0A286ZRR8	Rho GTPase activating protein 32 OS=Sus scrofa OX=9823 GN=ARHGAP32	ARHGAP32	189.36	0.8	1	1	1
A0A286ZRS3	Lipase maturation factor OS=Sus scrofa OX=9823 GN=LMF1	LMF1	63.471	4.3	2	2	1
A0A286ZRT5	Peptidase, mitochondrial processing alpha subunit OS=Sus scrofa OX=9823 GN=PMPCA	PMPCA	52.757	9	4	4	4	0.966	0.901	0.894	1.027	0.83	0.946	1.111	1.046	1.299	1.015	0.86714	1.252	0.032979	1.233	0.079816
A0A286ZRT8	Melanoma associated antigen (mutated) 1 OS=Sus scrofa OX=9823 GN=MUM1	MUM1	64.928	9.8	6	6	6	1.063	1.028	1.091	1.01	0.966	0.919	0.988	1.025	1.006	0.91	0.042183	0.949	0.060621	1.043	0.21944
A0A286ZRU7	Protein argonaute-3 OS=Sus scrofa OX=9823 GN=AGO3	AGO3	89.735	10.7	7	8	1
A0A286ZRU9	Serpin H1 precursor OS=Sus scrofa OX=9823 GN=SERPINH1	SERPINH1	46.524	39.5	15	36	15	1.007	0.982	0.984	0.946	0.95	0.976	1.016	1.037	1.025	0.966	0.052477	1.035	0.025537	1.072	0.0037376
A0A286ZRV1	Uncharacterized protein OS=Sus scrofa OX=9823	---	15.356	7.4	1	1	1	1.016	1.053	0.989	0.972	1.063	1.093	0.927	0.987	0.913	1.023	0.61406	0.924	0.058297	0.904	0.078085
A0A286ZRV9	Uncharacterized protein OS=Sus scrofa OX=9823	---	20.793	21.9	5	8	2	1.399	1.184	0.849	1.034	0.906	1.263	0.757	0.865	0.788	0.933	0.75956	0.702	0.092819	0.752	0.056899
A0A286ZRW3	Endonuclease, poly(U) specific OS=Sus scrofa OX=9823 GN=ENDOU	ENDOU	45.092	2.3	1	1	1
A0A286ZRX6	Platelet endothelial aggregation receptor 1 OS=Sus scrofa OX=9823 GN=PEAR1	PEAR1	107.79	1.2	1	1	1
A0A286ZRX8	Filamin C OS=Sus scrofa OX=9823 GN=FLNC	FLNC	286.58	29.5	70	139	53	1.051	0.999	0.992	1.002	0.975	0.966	1.037	1.029	1.01	0.967	0.196881	1.011	0.59624	1.045	0.030456
A0A286ZS01	NSE1 homolog, SMC5-SMC6 complex component OS=Sus scrofa OX=9823 GN=NSMCE1	NSMCE1	30.664	6	2	2	2
A0A286ZS17	Uncharacterized protein OS=Sus scrofa OX=9823	---	12.282	43.1	6	22	1
A0A286ZS25	RELB proto-oncogene, NF-kB subunit OS=Sus scrofa OX=9823 GN=RELB	RELB	60.18	2	1	2	1
A0A286ZS40	Ubiquitin recognition factor in ER associated degradation 1 OS=Sus scrofa OX=9823 GN=UFD1	UFD1	32.807	20.6	5	8	5	0.986	1.007	1.044	1.005	0.943	1.014	1.065	1.031	1.01	0.975	0.4228	1.023	0.37818	1.049	0.158424
A0A286ZS49	DENN domain containing 5A OS=Sus scrofa OX=9823 GN=DENND5A	DENND5A	77.966	2.2	2	2	1	1.159	1.087	1.118	0.829	0.982	0.994	0.998	0.906	0.94	0.834	0.039701	0.845	0.0075431	1.014	0.81356
A0A286ZS52	Metastasis associated 1 OS=Sus scrofa OX=9823 GN=MTA1	MTA1	80.859	4.2	3	4	2	1.003	1.091	1.013	0.945	1.058	0.99	0.963	0.973	0.975	0.963	0.4213	0.937	0.138025	0.973	0.50316
A0A286ZS54	Gasdermin D OS=Sus scrofa OX=9823 GN=GSDMD	GSDMD	50.837	14.7	5	7	5	0.996	0.955	0.958	0.974	1.079	0.968	1.047	0.988	1.062	1.039	0.38542	1.065	0.07384	1.025	0.57102
A0A286ZS56	Cortactin OS=Sus scrofa OX=9823 GN=CTTN	CTTN	60.883	31.5	16	26	16	1.038	0.981	1.019	0.97	1.007	0.979	0.93	0.976	0.989	0.973	0.2468	0.953	0.125784	0.979	0.3889
A0A286ZS59	Protein FAM210B OS=Sus scrofa OX=9823 GN=FAM210B	FAM210B	19.007	8.3	1	2	1	0.965	1.083	0.966	0.882	0.941	0.964	0.965	1.117	1.133	0.925	0.171421	1.067	0.37758	1.154	0.071124
A0A286ZS66	Protein tyrosine phosphatase, non-receptor type 23 OS=Sus scrofa OX=9823 GN=PTPN23	PTPN23	164.55	8.6	12	16	12	1.022	1.057	0.973	0.975	1.037	0.957	0.978	1.03	0.975	0.973	0.46454	0.977	0.49184	1.005	0.87664
A0A286ZS69	Proteasome subunit beta type OS=Sus scrofa OX=9823 GN=PSMB2	PSMB2	22.78	25.4	6	11	6	1.071	1.031	1.009	1.013	1.007	0.995	0.969	0.974	0.946	0.969	0.163239	0.929	0.0197203	0.958	0.0148375
A0A286ZS72	Cleavage stimulation factor subunit 1 OS=Sus scrofa OX=9823 GN=CSTF1	CSTF1	41.897	13.4	4	5	4	1.087	1.006	1.097	0.931	0.973	0.983	0.949	0.996	0.996	0.905	0.036524	0.922	0.0642	1.019	0.46854
A0A286ZS79	Eukaryotic translation initiation factor 2D OS=Sus scrofa OX=9823 GN=EIF2D	EIF2D	66.628	5.1	2	2	2	0.954	0.928	1.089	0.919	1.032	0.974	1.086	1.01	1.016	0.985	0.8229	1.047	0.4262	1.064	0.199725
A0A286ZS83	Heterogeneous nuclear ribonucleoproteins C1/C2 isoform 2 OS=Sus scrofa OX=9823 GN=HNRNPC	HNRNPC	32.09	42.6	13	34	13	1.028	1.019	1.001	1.009	0.962	1.006	1.03	0.979	0.986	0.977	0.24184	0.983	0.37308	1.006	0.79938
A0A286ZS87	Granulins precursor OS=Sus scrofa OX=9823 GN=GRN	GRN	62.365	12	6	11	6	1.026	0.954	0.959	0.987	0.949	0.928	1.02	1.053	1.012	0.974	0.43488	1.05	0.13758	1.077	0.026539
A0A286ZSC6	Dynein axonemal heavy chain 8 OS=Sus scrofa OX=9823 GN=DNAH8	DNAH8	509.1	0.5	2	3	2	0.903	0.967	0.906	1.013	0.957	1.019	1.062	1.071	1.115	1.077	0.068862	1.17	0.0042581	1.087	0.029178
A0A286ZSD7	Stomatin like 2 OS=Sus scrofa OX=9823 GN=STOML2	STOML2	38.645	22.5	6	11	6	1.035	1.004	1.045	0.972	1.013	0.944	0.951	0.995	0.984	0.95	0.094499	0.95	0.047864	1	0.98242
A0A286ZSE4	Ubiquitin-protein ligase E3A isoform 1 OS=Sus scrofa OX=9823 GN=UBE3A	UBE3A	93.745	7.7	5	7	5	1.041	1.028	0.916	1.077	1.003	0.989	0.844	1.076	1.052	1.028	0.5861	0.996	0.92668	0.968	0.67252
A0A286ZSG3	Catalase OS=Sus scrofa OX=9823 GN=CAT	CAT	59.929	46.9	25	48	25	0.975	1.021	1.026	1.039	1.012	1.012	0.992	0.973	0.956	1.014	0.5004	0.967	0.156599	0.954	0.026356
A0A286ZSG6	Epithelial stromal interaction 1 OS=Sus scrofa OX=9823 GN=EPSTI1	EPSTI1	35.917	6.6	2	2	2	1.074	1.019	1.128	1.069	0.932	0.98	0.926	0.94	0.948	0.925	0.190481	0.874	0.0111986	0.944	0.23974
A0A286ZSH4	FACT complex subunit SSRP1 OS=Sus scrofa OX=9823 GN=SSRP1	SSRP1	71.743	7.4	4	7	4	1.018	1.044	1.092	0.956	1.107	1.009	0.932	0.905	0.937	0.974	0.59016	0.88	0.0052449	0.903	0.085605
A0A286ZSI7	NOP9 nucleolar protein OS=Sus scrofa OX=9823 GN=NOP9	NOP9	61.827	2.3	1	1	1
A0A286ZSJ7	Complement C1q subcomponent subunit C precursor OS=Sus scrofa OX=9823 GN=C1QC	C1QC	26.023	7.3	1	2	1	0.952	1.021	0.995	0.894	0.979	0.915	1.092	1.034	1.127	0.939	0.138476	1.096	0.0477	1.167	0.0141154
A0A286ZSL1	General transcription factor IIIC subunit 2 OS=Sus scrofa OX=9823 GN=GTF3C2	GTF3C2	85.287	2	2	2	2
A0A286ZSM5	NKG2-D type II integral membrane protein OS=Sus scrofa OX=9823 GN=KLRK1	KLRK1	25.655	5	1	1	1	1.033	0.961	1.013	1.094	0.964	0.989	0.963	1.043	0.962	1.013	0.79682	0.987	0.71832	0.974	0.61638
A0A286ZSN6	Thymopoietin OS=Sus scrofa OX=9823 GN=TMPO	TMPO	73.549	21.6	10	27	5	1.23	1.081	1.051	0.971	1.044	0.933	0.851	0.874	0.904	0.877	0.090337	0.782	0.0090581	0.892	0.037919
A0A286ZSR2	Phosphorylated adaptor for RNA export OS=Sus scrofa OX=9823 GN=PHAX	PHAX	44.354	8.4	3	3	3
A0A286ZST9	CREB regulated transcription coactivator 3 OS=Sus scrofa OX=9823 GN=CRTC3	CRTC3	66.623	3.6	2	2	2	1.081	0.906	0.863	1.144	0.988	1.21	0.857	1.017	0.969	1.173	0.153704	0.998	0.99772	0.851	0.111842
A0A286ZSU2	BRCA1 associated protein OS=Sus scrofa OX=9823 GN=BRAP	BRAP	67.324	11.7	6	6	6	1.03	0.903	1.082	1.012	0.888	0.907	1.049	1.029	1.067	0.931	0.35656	1.043	0.45928	1.12	0.051136
A0A286ZSW3	MON2 homolog, regulator of endosome-to-Golgi trafficking OS=Sus scrofa OX=9823 GN=MON2	MON2	189.94	4.1	7	7	7	1.048	0.943	1.153	1.01	1.016	0.963	1.018	0.921	0.938	0.951	0.47638	0.915	0.25922	0.963	0.3309
A0A286ZSX8	Capping protein regulator and myosin 1 linker 1 OS=Sus scrofa OX=9823 GN=CARMIL1	CARMIL1	151.5	6.3	6	8	6	0.999	1.009	0.922	1.039	1.023	1.082	1.027	0.976	0.929	1.073	0.098297	1.001	0.98798	0.933	0.103081
A0A286ZSZ2	Membrane palmitoylated protein 5 OS=Sus scrofa OX=9823 GN=MPP5	MPP5	74.272	1.4	1	1	1
A0A286ZT03	FCH domain only 2 OS=Sus scrofa OX=9823 GN=FCHO2	FCHO2	82.721	6.6	5	5	5	1.004	0.971	1.049	0.953	1.039	0.915	1.044	0.928	1.005	0.961	0.40728	0.984	0.71218	1.024	0.66272
A0A286ZT12	SNF2 histone linker PHD RING helicase OS=Sus scrofa OX=9823 GN=SHPRH	SHPRH	180.61	0.8	1	1	1	1.11	1.055	1.048	1.025	0.949	0.803	0.856	1.075	1.102	0.864	0.112563	0.944	0.4833	1.092	0.46542
A0A286ZT21	Interferon-induced helicase C domain-containing protein 1 OS=Sus scrofa OX=9823 GN=IFIH1	IFIH1	111.01	5.8	7	8	7	1.093	1.106	0.979	1.05	1.081	1.007	0.845	0.902	0.954	0.987	0.80488	0.85	0.036102	0.861	0.020678
A0A286ZT23	VIP36-like protein precursor OS=Sus scrofa OX=9823 GN=LMAN2L	LMAN2L	35.876	6.1	2	2	2
A0A286ZT45	Thrombospondin type 1 domain containing 7A OS=Sus scrofa OX=9823 GN=THSD7A	THSD7A	173.56	3.1	4	4	4	0.972	1.143	1.119	1.135	0.842	1.015	0.785	1.001	1.003	0.925	0.45822	0.862	0.188483	0.932	0.59262
A0A286ZT56	Pre-mRNA processing factor 6 OS=Sus scrofa OX=9823 GN=PRPF6	PRPF6	120.23	12.1	13	15	13	1.074	1.046	1.038	0.957	0.99	1.008	0.931	0.941	0.987	0.936	0.022377	0.905	0.0085649	0.968	0.23216
A0A286ZT73	TAR (HIV-1) RNA binding protein 1 OS=Sus scrofa OX=9823 GN=TARBP1	TARBP1	151.32	1.6	2	2	2	0.624	0.663	0.871	1.112	0.855	0.801	1.334	1.256	1.494	1.283	0.157002	1.892	0.0048571	1.475	0.024276
A0A286ZT87	Histone-lysine N-methyltransferase EZH2 OS=Sus scrofa OX=9823 GN=EZH2	EZH2	75.791	2.4	2	2	2
A0A286ZTA6	Arylsulfatase A precursor OS=Sus scrofa OX=9823 GN=ARSA	ARSA	49.141	6.4	3	4	3	1.053	1.022	1.052	0.961	1.062	1.071	0.948	0.966	0.88	0.989	0.76226	0.894	0.0197206	0.903	0.086722
A0A286ZTA7	Exportin 6 OS=Sus scrofa OX=9823 GN=XPO6	XPO6	128.25	2.6	3	3	3
A0A286ZTB4	Uncharacterized protein OS=Sus scrofa OX=9823	---	85.099	1.2	1	1	1	1.677	1.221	1.235	0.637	0.996	0.939	0.617	1.003	0.724	0.622	0.050785	0.567	0.030976	0.911	0.66002
A0A286ZTB7	Gem nuclear organelle associated protein 4 OS=Sus scrofa OX=9823 GN=GEMIN4	GEMIN4	117.99	5.3	4	6	4	0.962	0.906	1.009	0.956	1.028	1.037	1.027	1.07	1.02	1.05	0.291	1.083	0.079322	1.032	0.34712
A0A286ZTC9	Uncharacterized protein OS=Sus scrofa OX=9823	---	77.547	23.1	11	23	1	1.134	1.362	0.965	1.034	1.004	1.117	0.471	1.026	0.916	0.912	0.46816	0.697	0.197942	0.765	0.32024
A0A286ZTD8	Adapter molecule crk OS=Sus scrofa OX=9823 GN=CRK	CRK	33.809	29.6	7	12	7	0.971	1.075	0.936	0.945	0.942	1.051	1.083	1.085	1.02	0.985	0.80534	1.069	0.2137	1.085	0.116276
A0A286ZTE1	Sialoadhesin OS=Sus scrofa OX=9823 GN=SIGLEC1	SIGLEC1	185.05	24.4	35	60	35	1.075	1.075	1.052	0.953	0.963	0.958	0.966	0.964	1.009	0.898	0.00015932	0.918	0.0065385	1.023	0.21818
A0A286ZTF6	Nucleolar protein 7 OS=Sus scrofa OX=9823 GN=NOL7	NOL7	29.196	3.1	1	1	1	1.051	0.979	0.977	0.977	0.979	1.004	1.003	0.999	1.051	0.984	0.5828	1.015	0.62152	1.031	0.171823
A0A286ZTG3	Wiskott-Aldrich syndrome OS=Sus scrofa OX=9823 GN=WAS	WAS	52.691	15.4	6	15	6	1.002	0.972	0.978	0.952	1.01	0.962	1.046	1.003	1.032	0.991	0.6575	1.044	0.050795	1.054	0.075777
A0A286ZTJ3	Transmembrane emp24 domain-containing protein 7 precursor OS=Sus scrofa OX=9823 GN=TMED7	TMED7	21.412	28	6	8	6	1.108	1.132	1.04	0.907	0.96	1	0.907	0.935	0.896	0.874	0.024018	0.835	0.0031775	0.955	0.21702
A0A286ZTK5	N-acylethanolamine acid amidase OS=Sus scrofa OX=9823 GN=NAAA	NAAA	38.382	13.1	4	6	4	1.093	1.062	0.968	1.08	0.96	0.943	0.916	0.949	1.015	0.955	0.45536	0.922	0.16446	0.965	0.54738
A0A286ZTN0	Nuclear receptor-binding protein OS=Sus scrofa OX=9823 GN=NRBP1	NRBP1	59.83	20.6	9	10	9	0.998	1.02	0.965	0.985	1.019	1.019	0.955	1.047	1.053	1.013	0.5321	1.024	0.55066	1.011	0.78796
A0A286ZTN3	BUD23, rRNA methyltransferase and ribosome maturation factor OS=Sus scrofa OX=9823 GN=BUD23	BUD23	30.165	8.2	1	1	1
A0A286ZTS1	Trans-L-3-hydroxyproline dehydratase OS=Sus scrofa OX=9823 GN=L3HYPDH	L3HYPDH	38.089	11.9	3	4	3	0.932	0.95	0.966	0.863	1.004	1	1.059	1.14	1.102	1.007	0.9364	1.159	0.0034021	1.151	0.057617
A0A286ZTU0	Uncharacterized protein OS=Sus scrofa OX=9823 GN=NUP54	NUP54	55.996	19	9	11	9	1.019	1.014	0.978	1.027	1.006	0.991	1.059	1.037	0.971	1.004	0.80512	1.019	0.5722	1.014	0.65494
A0A286ZTU1	Surfeit 2 OS=Sus scrofa OX=9823 GN=SURF2	SURF2	29.282	10.1	2	2	2	0.997	1.075	0.986	0.949	0.964	0.971	0.986	1.001	1.085	0.943	0.107343	1.005	0.9178	1.065	0.110239
A0A286ZTU8	Taxilin alpha OS=Sus scrofa OX=9823 GN=TXLNA	TXLNA	62.781	17	9	11	9	0.877	0.961	1.017	1.042	1.035	0.993	1.005	1	1.061	1.075	0.179624	1.074	0.197356	0.999	0.95544
A0A286ZTX0	Heat shock protein family A (Hsp70) member 13 OS=Sus scrofa OX=9823 GN=HSPA13	HSPA13	44.995	7.7	3	3	3	0.955	0.808	0.892	1.053	1.071	1	1.018	1.072	1.152	1.177	0.035465	1.221	0.029158	1.038	0.43082
A0A286ZU25	WD repeat domain 77 OS=Sus scrofa OX=9823 GN=WDR77	WDR77	37.057	16.1	5	7	5	1.077	0.996	1.074	0.983	1.014	0.985	0.914	0.988	1.016	0.948	0.124641	0.927	0.135776	0.979	0.53364
A0A286ZU42	Phosphatidylinositol-binding clathrin assembly protein OS=Sus scrofa OX=9823 GN=PICALM	PICALM	65.792	21.2	11	20	11	0.889	0.935	1.014	0.998	0.987	1.031	1.048	1.074	1.104	1.063	0.199716	1.137	0.034739	1.07	0.027941
A0A286ZU67	Pleckstrin homology domain containing O1 OS=Sus scrofa OX=9823 GN=PLEKHO1	PLEKHO1	42.37	9.3	4	5	4	1.163	1.1	1.149	0.969	1.05	0.914	0.837	0.913	0.92	0.86	0.024924	0.783	0.0021	0.91	0.137779
A0A286ZU69	DENN domain containing 4B OS=Sus scrofa OX=9823 GN=DENND4B	DENND4B	136.59	1.3	2	2	2
A0A286ZU70	Sorting nexin family member 27 OS=Sus scrofa OX=9823 GN=SNX27	SNX27	55.781	17.9	8	8	8	1.036	1.129	1.069	0.841	0.982	1.019	0.925	1.016	0.997	0.879	0.107981	0.908	0.065083	1.034	0.61326
A0A286ZU86	C2 calcium dependent domain containing 5 OS=Sus scrofa OX=9823 GN=C2CD5	C2CD5	112.01	9.3	9	11	9	0.964	1.085	1.074	1.03	0.991	1.004	0.923	1.036	0.945	0.969	0.48172	0.93	0.2332	0.96	0.32042
A0A286ZU95	Probable 28S rRNA (cytosine(4447)-C(5))-methyltransferase OS=Sus scrofa OX=9823 GN=NOP2	NOP2	75.49	5.6	3	4	3	1.006	0.964	1.002	1.048	1.057	1.074	0.973	1.007	0.886	1.07	0.0118169	0.964	0.407	0.902	0.054158
A0A286ZUB8	Uncharacterized protein OS=Sus scrofa OX=9823 GN=LOC100522887	LOC100522887	35.309	14.7	4	5	4	0.928	0.92	0.946	1.063	1.099	1.05	0.972	1.003	0.945	1.15	0.00094001	1.045	0.082878	0.909	0.0121772
A0A286ZUC9	Tonsoku like, DNA repair protein OS=Sus scrofa OX=9823 GN=TONSL	TONSL	137.09	0.6	1	1	1
A0A286ZUD5	SNARE-associated protein Snapin OS=Sus scrofa OX=9823 GN=SNAPIN	SNAPIN	14.86	26.5	3	4	3	1.091	1.04	0.956	0.997	1.009	1.014	0.987	0.961	0.91	0.978	0.65128	0.926	0.168796	0.946	0.084817
A0A286ZUF1	Ectonucleotide pyrophosphatase/phosphodiesterase 1 OS=Sus scrofa OX=9823 GN=ENPP1	ENPP1	93.543	5.9	5	5	5	1.061	1.05	1.094	1.116	1.031	1.09	0.878	0.917	0.779	1.01	0.73728	0.803	0.0116623	0.795	0.0129771
A0A286ZUG0	Uncharacterized protein OS=Sus scrofa OX=9823 GN=EPN1	EPN1	57.697	10.3	5	8	3	0.948	1.002	0.922	0.965	1.097	1.071	0.889	1.009	0.945	1.091	0.136824	0.99	0.81672	0.907	0.145438
A0A286ZUG8	Nucleoporin 98 OS=Sus scrofa OX=9823 GN=NUP98	NUP98	174.4	16.8	22	27	22	1.02	1.062	1.036	1.028	0.998	0.954	0.953	0.971	1.048	0.956	0.138524	0.953	0.195479	0.997	0.93666
A0A286ZUI9	Glycogenin 1 OS=Sus scrofa OX=9823 GN=GYG1	GYG1	37.404	18.6	7	16	7	1.002	0.978	0.943	1.006	1.011	1.083	0.968	1.04	0.986	1.061	0.119363	1.024	0.43966	0.966	0.34044
A0A286ZUJ8	Phosphatidylinositol-4,5-bisphosphate 4-phosphatase OS=Sus scrofa OX=9823 GN=PIP4P1	PIP4P1	30.153	3.9	1	2	1	0.854	0.908	0.895	0.997	1.008	1.005	1.036	1.112	1.2	1.133	0.0026444	1.26	0.0076975	1.112	0.133176
A0A286ZUM0	Chromosome 19 open reading frame 12 OS=Sus scrofa OX=9823 GN=C19orf12	C19orf12	15.032	12.8	2	2	2
A0A286ZUN9	NADH:ubiquinone oxidoreductase core subunit S8 OS=Sus scrofa OX=9823 GN=NDUFS8	NDUFS8	23.787	14.2	3	5	3	0.976	1.062	0.996	1.022	1.048	1.07	0.907	0.966	0.908	1.035	0.29186	0.917	0.057515	0.886	0.0078842
A0A286ZUP2	Regulator of G-protein signaling 18 OS=Sus scrofa OX=9823 GN=RGS18	RGS18	27.734	11.5	2	2	2	0.849	1.119	0.909	1.133	1.151	1.223	0.857	0.893	0.871	1.219	0.076725	0.911	0.41172	0.747	0.00037726
A0A286ZUP4	Plasmalemma vesicle associated protein OS=Sus scrofa OX=9823 GN=PLVAP	PLVAP	48.002	36.3	16	24	16	1.03	1.044	1.038	1	0.99	0.995	0.947	0.943	0.988	0.959	0.00102258	0.925	0.0070181	0.964	0.072644
A0A286ZUQ1	Inositol 1,4,5-trisphosphate receptor type 1 OS=Sus scrofa OX=9823 GN=ITPR1	ITPR1	308.48	9.3	25	31	15	0.975	0.981	1.053	0.997	0.962	0.996	0.963	1.046	1.038	0.982	0.5542	1.013	0.74728	1.031	0.3559
A0A286ZUQ8	Zinc finger protein 792 OS=Sus scrofa OX=9823 GN=ZNF792	ZNF792	62.144	1.7	1	1	1	0.792	0.782	0.902	1.064	0.868	0.961	1.143	1.271	1.239	1.168	0.106739	1.475	0.0021962	1.263	0.024401
A0A286ZUS1	RAB8B, member RAS oncogene family OS=Sus scrofa OX=9823 GN=RAB8B	RAB8B	23.562	36.4	9	28	5	1.033	0.978	1.034	0.99	1.006	0.925	0.97	1.07	1.052	0.959	0.25596	1.015	0.69864	1.059	0.22714
A0A286ZUT3	Ras-related protein Rap-2a OS=Sus scrofa OX=9823 GN=RAP2A	RAP2A	20.585	20.2	3	5	1	0.998	0.955	1.08	1.002	1.147	0.895	0.929	1.021	0.984	1.004	0.99782	0.967	0.51086	0.964	0.69476
A0A286ZUV1	DLG associated protein 4 OS=Sus scrofa OX=9823 GN=DLGAP4	DLGAP4	49.462	13.7	6	8	6	1.107	0.97	1.019	1.044	1.018	0.995	0.977	0.939	0.951	0.987	0.79502	0.926	0.134201	0.938	0.024197
A0A286ZUV4	CKLF like MARVEL transmembrane domain containing 3 OS=Sus scrofa OX=9823 GN=CMTM3	CMTM3	19.817	6.5	1	1	1	0.905	1.077	1.11	0.939	0.995	0.873	1.233	1.014	0.852	0.908	0.27232	1.002	0.96876	1.104	0.47602
A0A286ZUW0	Glutamine--fructose-6-phosphate aminotransferase OS=Sus scrofa OX=9823 GN=GFPT1	GFPT1	76.737	27.5	15	24	15	1.01	0.991	1	1.013	1.029	1.03	0.981	0.958	0.982	1.024	0.038397	0.973	0.050345	0.951	0.006559
A0A286ZUW2	N(alpha)-acetyltransferase 25, NatB auxiliary subunit OS=Sus scrofa OX=9823 GN=NAA25	NAA25	108.72	5.4	6	6	6	1.133	1.003	1.055	0.896	1.048	0.93	0.95	0.881	1.019	0.901	0.147997	0.893	0.107541	0.992	0.90674
A0A286ZUW5	Prolyl 4-hydroxylase subunit alpha-1 precursor OS=Sus scrofa OX=9823 GN=P4HA1	P4HA1	60.852	16.5	8	12	1	0.959	0.957	0.978	0.843	1.026	0.948	1.148	1.25	0.912	0.973	0.65226	1.144	0.31454	1.175	0.22984
A0A286ZUX3	Cullin 4B OS=Sus scrofa OX=9823 GN=CUL4B	CUL4B	102.49	20.4	17	22	12	1.078	1.037	1.052	0.991	1.03	0.93	0.961	0.925	0.952	0.932	0.08848	0.896	0.0024398	0.962	0.29636
A0A286ZUZ5	Microtubule-associated protein 1S OS=Sus scrofa OX=9823 GN=MAP1S	MAP1S	109.06	10.3	10	11	10	1.005	0.925	1.085	1.022	0.929	0.92	1.099	0.909	0.956	0.952	0.4474	0.983	0.81562	1.032	0.6752
A0A286ZUZ7	Protein inhibitor of activated STAT 2 OS=Sus scrofa OX=9823 GN=PIAS2	PIAS2	63.404	2.6	1	1	1	0.973	0.912	0.991	1.025	1.025	1.05	0.968	1.048	1.027	1.078	0.046058	1.058	0.178519	0.982	0.49064
A0A286ZV07	Fucokinase OS=Sus scrofa OX=9823 GN=FUK	FUK	117.59	6.6	6	8	6	1.103	0.95	1.028	0.972	1.069	0.968	0.968	0.927	1.015	0.977	0.69368	0.944	0.32982	0.967	0.47176
A0A286ZV36	BRISC and BRCA1 A complex member 2 OS=Sus scrofa OX=9823 GN=BABAM2	BABAM2	43.56	12.3	4	4	4	0.914	1.058	1.013	1.108	1.063	0.934	1.034	0.895	0.998	1.04	0.59634	0.981	0.76522	0.943	0.43548
A0A286ZV41	Eukaryotic elongation factor 2 kinase OS=Sus scrofa OX=9823 GN=EEF2K	EEF2K	67.255	12	8	8	8	0.971	1.079	0.997	1.121	1.097	1.052	0.882	0.928	0.945	1.073	0.124461	0.904	0.05708	0.843	0.0035198
A0A286ZV62	RNA helicase OS=Sus scrofa OX=9823 GN=DDX10	DDX10	94.649	5	3	3	3	0.902	1.05	1.032	1.04	0.939	0.935	0.981	1.117	1.017	0.977	0.72142	1.044	0.51746	1.069	0.27088
A0A286ZV86	Uncharacterized protein OS=Sus scrofa OX=9823	---	12.374	41.3	3	16	2	1.046	1.133	1.079	1.112	1.115	1.079	0.773	0.822	0.736	1.015	0.58692	0.715	0.00105959	0.705	0.00048045
A0A286ZV95	Transmembrane p24 trafficking protein 10 OS=Sus scrofa OX=9823 GN=TMED10	TMED10	24.91	38.4	7	14	7	0.987	1.009	1.011	0.993	1.027	0.954	0.963	0.952	0.972	0.989	0.6405	0.96	0.0140764	0.971	0.25672
A0A286ZVA6	Mitochondrial import inner membrane translocase subunit TIM23 OS=Sus scrofa OX=9823 GN=LOC100157391	LOC100157391	18.378	9.7	1	1	1
A0A286ZVB1	PBX homeobox 1 OS=Sus scrofa OX=9823 GN=PBX1	PBX1	26.995	9.1	2	2	1
A0A286ZVB4	Ribosomal RNA small subunit methyltransferase NEP1 OS=Sus scrofa OX=9823 GN=EMG1	EMG1	22.115	4.5	1	1	1	1.069	0.98	1.017	1.058	1.026	1.035	0.89	1.029	0.919	1.017	0.54512	0.926	0.196082	0.91	0.098862
A0A286ZVC3	Uncharacterized protein OS=Sus scrofa OX=9823 GN=AZGP1	AZGP1	32.146	7.4	2	3	2	1.154	1.053	1.097	0.873	0.772	1.068	0.964	0.893	1.146	0.821	0.10472	0.909	0.26976	1.107	0.43054
A0A286ZVC5	Chromosome 5 open reading frame 24 OS=Sus scrofa OX=9823 GN=C5orf24	C5orf24	20.118	7.4	1	1	1
A0A286ZVD0	Translocase of inner mitochondrial membrane 10 OS=Sus scrofa OX=9823 GN=TIMM10	TIMM10	10.333	24.4	2	2	2
A0A286ZVD4	Pantothenate kinase 4 OS=Sus scrofa OX=9823 GN=PANK4	PANK4	82.819	1.9	1	1	1	1.119	0.949	1.056	0.886	1.013	1.032	0.856	1.162	0.957	0.938	0.40232	0.952	0.61902	1.015	0.93274
A0A286ZVF6	Uncharacterized protein OS=Sus scrofa OX=9823 GN=LOC100155195	LOC100155195	51.094	34.4	19	28	19	1.052	1.056	1.05	1.044	1.023	1.042	0.918	0.958	0.898	0.984	0.079102	0.878	0.020821	0.892	0.0046814
A0A286ZVG3	Uncharacterized protein OS=Sus scrofa OX=9823 GN=LOC110257905	LOC110257905	5.0807	72.7	6	11	4	0.832	0.888	0.926	1.005	1.008	1.032	0.818	0.87	0.837	1.151	0.0118448	0.954	0.26854	0.829	0.00069958
A0A286ZVI3	Serine/threonine kinase 25 OS=Sus scrofa OX=9823 GN=STK25	STK25	50.056	16.4	6	8	2	0.81	0.962	1.052	1.243	0.943	0.919	0.949	1.036	1.094	1.1	0.50156	1.09	0.35764	0.992	0.99642
A0A286ZVK7	Phosphatidylinositol-4,5-bisphosphate 3-kinase catalytic subunit alpha OS=Sus scrofa OX=9823 GN=PIK3CA	PIK3CA	118.01	4.8	5	5	5	1.182	0.955	1.104	0.965	0.872	0.896	0.994	1.025	1.034	0.843	0.074341	0.942	0.431	1.117	0.026678
A0A286ZVL0	Heterogeneous nuclear ribonucleoprotein U OS=Sus scrofa OX=9823 GN=HNRNPU	HNRNPU	90.665	29.9	27	76	27	1.025	1.044	1.021	1.014	0.997	1.006	0.963	0.985	0.958	0.976	0.047139	0.94	0.0049625	0.963	0.0188011
A0A286ZVL1	Thioredoxin related transmembrane protein 1 OS=Sus scrofa OX=9823 GN=TMX1	TMX1	31.589	21.2	8	16	8	1.032	0.989	1.041	0.968	0.941	1.015	0.994	1.013	0.981	0.955	0.163221	0.976	0.25644	1.022	0.40958
A0A286ZVL6	Ubiquitin carboxyl-terminal hydrolase 19 OS=Sus scrofa OX=9823 GN=USP19	USP19	129.63	4.1	3	3	3	0.96	1.009	0.989	0.904	1.037	1.027	1.031	1.1	1.053	1.003	0.9733	1.076	0.037321	1.073	0.21024
A0A286ZVL8	Uncharacterized protein OS=Sus scrofa OX=9823	---	13.528	17.5	2	16	1	0.752	0.581	0.566	1.347	1.147	1.043	1.188	1.213	1.192	1.863	0.0060032	1.892	0.0192233	1.016	0.803
A0A286ZVN3	Syntaxin 18 OS=Sus scrofa OX=9823 GN=STX18	STX18	38.495	9	4	5	4
A0A286ZVP6	Mediator complex subunit 22 OS=Sus scrofa OX=9823 GN=MED22	MED22	22.324	5.5	1	2	1	1.116	1.152	0.866	0.967	0.978	0.982	0.904	0.963	1.093	0.934	0.5726	0.944	0.6477	1.011	0.8984
A0A286ZVQ0	Acyl-CoA thioesterase 4 OS=Sus scrofa OX=9823 GN=ACOT4	ACOT4	25.942	26.3	5	8	4	1.101	1.017	1.015	0.967	1.024	0.954	1.043	1.002	1.016	0.94	0.148343	0.977	0.48176	1.039	0.189524
A0A286ZVS0	Splicing factor 3b subunit 3 OS=Sus scrofa OX=9823 GN=SF3B3	SF3B3	135.56	20.4	21	40	21	0.992	1.018	1.003	0.996	1.022	0.989	0.995	0.959	0.992	0.998	0.87824	0.978	0.181977	0.98	0.25486
A0A286ZVS1	Polyamine modulated factor 1 binding protein 1 OS=Sus scrofa OX=9823 GN=PMFBP1	PMFBP1	73.467	1.9	1	1	1	1.324	0.956	1.065	0.856	1.05	0.901	0.885	1.03	0.968	0.839	0.20964	0.862	0.25128	1.027	0.72414
A0A286ZVX6	Tumor protein p53 inducible protein 11 OS=Sus scrofa OX=9823 GN=TP53I11	TP53I11	20.998	19	5	13	5	0.949	0.939	1.022	1.06	0.992	1.006	1.071	1.007	0.947	1.051	0.2096	1.04	0.438	0.989	0.78874
A0A286ZVY0	Selenium binding protein 1 OS=Sus scrofa OX=9823 GN=SELENBP1	SELENBP1	55.945	36.1	15	31	15	0.915	0.951	0.994	1.074	1.015	0.983	1	1.059	1.031	1.074	0.112721	1.08	0.055883	1.006	0.84896
A0A286ZVY9	Eukaryotic translation initiation factor 4 gamma 1 OS=Sus scrofa OX=9823 GN=EIF4G1	EIF4G1	173.11	28.1	38	61	2	1.137	1.109	0.986	0.986	0.836	0.948	0.955	1.011	1.057	0.857	0.080103	0.935	0.281	1.091	0.198438
A0A286ZW04	Core-binding factor beta subunit OS=Sus scrofa OX=9823 GN=CBFB	CBFB	17.96	18.1	2	3	1	1.003	1.05	1.08	0.957	1.127	1.053	1.004	0.876	0.854	1.001	0.99282	0.873	0.064643	0.872	0.116798
A0A286ZW20	Uncharacterized protein OS=Sus scrofa OX=9823 GN=DTNB	DTNB	59.371	3.9	2	2	2	1.089	1.201	0.696	1.084	0.841	1.027	1.071	1.07	0.953	0.989	0.96198	1.036	0.74246	1.048	0.58436
A0A286ZW32	Alpha tocopherol transfer protein like OS=Sus scrofa OX=9823 GN=TTPAL	TTPAL	34.194	2.6	1	1	1
A0A286ZW55	Sphingosine-1-phosphate lyase 1 OS=Sus scrofa OX=9823 GN=SGPL1	SGPL1	58.035	24.1	11	17	11	1.036	0.932	0.966	1.047	1.003	0.971	1.01	0.991	1.002	1.03	0.47756	1.024	0.48606	0.994	0.81804
A0A286ZW70	Peptidyl-prolyl cis-trans isomerase OS=Sus scrofa OX=9823 GN=PPIB	PPIB	23.784	50.9	12	36	11	0.984	0.976	0.998	1.007	0.979	0.99	1.016	1.029	0.992	1.006	0.5948	1.027	0.104405	1.02	0.20834
A0A286ZW74	Round spermatid basic protein 1 OS=Sus scrofa OX=9823 GN=RSBN1	RSBN1	82.998	0.9	1	2	1	0.53	0.554	0.545	1.875	1.801	1.95	0.573	0.597	0.58	3.454	6.1061e-07	1.074	0.0156443	0.311	7.3273e-07
A0A286ZW75	Scaffold attachment factor B2 OS=Sus scrofa OX=9823 GN=SAFB2	SAFB2	98.452	18.6	16	25	7	1.112	1.219	1.027	0.849	0.933	0.994	0.948	1.02	0.916	0.827	0.048021	0.859	0.062424	1.039	0.52008
A0A286ZW82	Calcium-transporting ATPase OS=Sus scrofa OX=9823 GN=ATP2A3	ATP2A3	109.33	26.8	24	46	16	1.009	0.985	0.993	1.022	0.966	1.012	1.018	1.019	1.003	1.004	0.83802	1.018	0.113877	1.013	0.497
A0A286ZW95	Patatin like phospholipase domain containing 6 OS=Sus scrofa OX=9823 GN=PNPLA6	PNPLA6	142.53	3.6	5	6	5	0.965	0.917	0.971	1.079	0.987	0.999	1.083	0.986	1.027	1.074	0.099104	1.085	0.067475	1.01	0.80802
A0A286ZWA5	Ubiquilin 2 OS=Sus scrofa OX=9823 GN=UBQLN2	UBQLN2	65.749	7.4	3	7	2
A0A286ZWB3	TBC1 domain family member 8 OS=Sus scrofa OX=9823 GN=TBC1D8	TBC1D8	113.75	10.1	9	10	9	1.048	0.956	0.98	0.942	0.997	0.965	1.03	1.049	1.013	0.973	0.45108	1.036	0.28328	1.065	0.031057
A0A286ZWB9	Uncharacterized protein OS=Sus scrofa OX=9823	---	55.324	5.8	2	2	2	0.943	1.159	0.973	0.924	1.035	0.998	1.109	0.985	0.878	0.962	0.64452	0.967	0.73028	1.005	0.9838
A0A286ZWC7	Dynein cytoplasmic 1 intermediate chain 1 OS=Sus scrofa OX=9823 GN=DYNC1I1	DYNC1I1	70.768	1.9	1	1	1
A0A286ZWD1	Uncharacterized protein OS=Sus scrofa OX=9823 GN=LOC100738971	LOC100738971	20.818	5.8	1	1	1
A0A286ZWD4	Uncharacterized protein OS=Sus scrofa OX=9823 GN=LOC102166678	LOC102166678	177.49	1.2	2	2	2	0.852	0.829	0.92	1.1	1.06	1.112	1.036	1.019	1.086	1.258	0.0025826	1.208	0.0066169	0.96	0.162095
A0A286ZWE1	RNA binding motif protein 23 OS=Sus scrofa OX=9823 GN=RBM23	RBM23	47.375	5.6	2	2	1
A0A286ZWE6	Uncharacterized protein OS=Sus scrofa OX=9823	---	28.08	5.2	1	1	1
A0A286ZWF5	Uncharacterized protein OS=Sus scrofa OX=9823	---	12.856	9.1	1	1	1
A0A286ZWG0	Chromosome 18 open reading frame 32 OS=Sus scrofa OX=9823 GN=C18orf32	C18orf32	8.7574	23.7	2	2	2	1.063	1	0.948	0.992	1.024	0.989	1.064	0.947	0.989	0.998	0.978	0.996	0.94116	0.998	0.94342
A0A286ZWG4	ATP-dependent 6-phosphofructokinase OS=Sus scrofa OX=9823 GN=PFKM	PFKM	82.462	16.8	10	11	8	0.978	0.899	1.047	0.969	1.071	0.947	1.068	1.082	1.054	1.022	0.72618	1.096	0.105201	1.073	0.136984
A0A286ZWI2	Cleavage and polyadenylation specificity factor subunit 5 OS=Sus scrofa OX=9823 GN=NUDT21	NUDT21	26.256	32.6	8	14	8	1.134	1.053	0.995	0.948	1	0.951	1.003	0.97	0.999	0.911	0.091581	0.934	0.163698	1.025	0.2838
A0A286ZWJ2	Eukaryotic translation elongation factor 1 epsilon-1 OS=Sus scrofa OX=9823 GN=EEF1E1	EEF1E1	19.725	5.2	1	2	1	1.105	0.993	0.993	1.041	0.984	0.952	0.932	1.009	1.015	0.963	0.44946	0.956	0.38238	0.993	0.85966
A0A286ZWJ4	SDE2 telomere maintenance homolog OS=Sus scrofa OX=9823 GN=SDE2	SDE2	48.229	6.3	3	4	3	1.058	0.975	0.983	0.996	0.993	0.997	1.023	1.001	0.994	0.99	0.7544	1.001	0.96528	1.011	0.34954
A0A286ZWL1	Leiomodin 1 OS=Sus scrofa OX=9823 GN=LMOD1	LMOD1	65.732	23.5	13	18	13	0.988	1.087	1.002	0.986	0.966	0.987	0.982	1.021	1.018	0.955	0.21476	0.982	0.61412	1.028	0.128662
A0A286ZWM0	5'-nucleotidase OS=Sus scrofa OX=9823 GN=NT5C3B	NT5C3B	34.648	3	1	1	1
A0A286ZWM2	Uncharacterized protein OS=Sus scrofa OX=9823 GN=LOC110256379	LOC110256379	23.235	4.3	1	1	1	0.583	0.729	0.733	1.056	1.133	1.129	1.221	1.202	1.219	1.622	0.0034372	1.781	0.0164185	1.098	0.0161586
A0A286ZWM5	Leucine rich repeat containing 8 VRAC subunit D OS=Sus scrofa OX=9823 GN=LRRC8D	LRRC8D	97.748	1.5	1	1	1
A0A286ZWN2	Caspase-10 OS=Sus scrofa OX=9823 GN=CASP10	CASP10	58.433	12.6	5	6	5	0.901	0.877	0.96	0.985	1.073	1.1	1.017	0.999	1.099	1.153	0.029358	1.138	0.031484	0.986	0.77704
A0A286ZWP0	CCM2 scaffolding protein OS=Sus scrofa OX=9823 GN=CCM2	CCM2	43.058	7.3	2	2	2
A0A286ZWP7	Maturin OS=Sus scrofa OX=9823 GN=MTURN	MTURN	15.534	12.6	1	1	1
A0A286ZWQ0	Neutrophil cytosol factor 2 OS=Sus scrofa OX=9823 GN=NCF2	NCF2	59.126	31.8	14	23	14	0.975	0.944	0.944	1	1.09	1	0.998	1.051	1.047	1.079	0.069415	1.081	0.0169959	1.002	0.94366
A0A286ZWQ3	Cell division cycle 26 OS=Sus scrofa OX=9823 GN=CDC26	CDC26	9.7698	10.6	1	1	1	1.098	0.874	0.997	0.969	1.049	1.161	0.907	0.976	0.994	1.071	0.45346	0.969	0.7173	0.905	0.174441
A0A286ZWQ4	UPF0688 protein C1orf174 homolog OS=Sus scrofa OX=9823 GN=C1orf174	C1orf174	23.895	7.1	1	2	1
A0A286ZWQ7	Doublecortin like kinase 1 OS=Sus scrofa OX=9823 GN=DCLK1	DCLK1	82.263	19	11	14	11	1.083	1.073	1.034	0.885	1	0.94	0.979	0.974	0.986	0.886	0.032118	0.921	0.0049644	1.04	0.36882
A0A286ZWS0	SH3 domain-binding glutamic acid-rich-like protein OS=Sus scrofa OX=9823 GN=SH3BGRL3	SH3BGRL3	10.454	47.3	5	18	5	1.148	1.172	1.103	0.948	0.953	0.935	0.945	0.927	0.866	0.829	0.00055587	0.8	0.0021811	0.965	0.25646
A0A286ZWS9	Adaptor related protein complex 3 sigma 1 subunit OS=Sus scrofa OX=9823 GN=AP3S1	AP3S1	18.894	26	4	8	4	1.042	1.02	1.213	0.997	1.035	1.073	0.933	0.906	0.791	0.948	0.43502	0.803	0.042623	0.847	0.037978
A0A286ZWV3	Uncharacterized protein OS=Sus scrofa OX=9823	---	13.161	15.1	2	3	2
A0A286ZWV8	Oxysterol-binding protein OS=Sus scrofa OX=9823 GN=OSBPL5	OSBPL5	98.383	3.1	2	2	2	1.196	1.058	0.837	0.845	0.833	0.943	1.041	1.033	1.245	0.848	0.23598	1.074	0.55422	1.266	0.032077
A0A286ZWW2	Heterogeneous nuclear ribonucleoprotein H2 OS=Sus scrofa OX=9823 GN=HNRNPH2	HNRNPH2	49.249	32.5	13	45	5	0.98	0.919	1.015	0.987	1.056	1.018	1.005	1.041	0.988	1.05	0.22924	1.041	0.2812	0.991	0.7436
A0A286ZWZ3	Eukaryotic translation initiation factor 4E nuclear import factor 1 OS=Sus scrofa OX=9823 GN=EIF4ENIF1	EIF4ENIF1	105.66	7.2	6	9	6	0.961	0.928	1.046	0.729	0.856	1.081	1.06	0.91	1.434	0.908	0.41798	1.16	0.39604	1.277	0.24518
A0A286ZWZ5	Aspartyl-tRNA synthetase 2, mitochondrial OS=Sus scrofa OX=9823 GN=DARS2	DARS2	71.051	3.8	3	3	3
A0A286ZWZ9	Prolyl endopeptidase like OS=Sus scrofa OX=9823 GN=PREPL	PREPL	73.281	1.3	1	1	1
A0A286ZX04	ATP synthase, H+ transporting, mitochondrial Fo complex subunit s (factor B) OS=Sus scrofa OX=9823 GN=ATP5S	ATP5S	23.466	10	2	2	2	0.865	1.029	0.92	1.115	0.993	0.971	1.022	1.085	1.013	1.094	0.24396	1.109	0.128945	1.013	0.77576
A0A286ZX08	Uncharacterized protein OS=Sus scrofa OX=9823 GN=CLIP2	CLIP2	111.84	13	14	18	10	1.193	0.947	1.165	1.073	0.997	1.027	0.875	0.951	0.797	0.937	0.4746	0.794	0.062821	0.847	0.038319
A0A286ZX26	Cathepsin D OS=Sus scrofa OX=9823 GN=CTSD	CTSD	44.123	33.7	10	54	1	0.899	0.94	1.017	0.998	1.116	1.066	1.092	0.998	0.879	1.113	0.090496	1.04	0.64414	0.934	0.36946
A0A286ZX49	Mitogen-activated protein kinase kinase kinase kinase 4 OS=Sus scrofa OX=9823 GN=MAP4K4	MAP4K4	132.56	5.6	6	7	4	1.141	1.079	1.034	0.983	0.94	0.942	0.98	0.993	0.93	0.88	0.0167156	0.892	0.030945	1.013	0.6275
A0A286ZX89	Formation of mitochondrial complex V assembly factor 1 homolog OS=Sus scrofa OX=9823 GN=FMC1	FMC1	12.878	10.6	1	2	1
A0A286ZXA0	Insulin-like growth factor-binding protein 7 precursor OS=Sus scrofa OX=9823 GN=IGFBP7	IGFBP7	29.003	25.9	6	6	6	0.951	0.993	1.009	0.865	0.911	0.993	1.165	1.015	1.107	0.938	0.20962	1.113	0.073645	1.187	0.0394
A0A286ZXA4	Uncharacterized protein OS=Sus scrofa OX=9823 GN=AAMDC	AAMDC	13.374	33.6	3	5	3	1.135	1.22	1.103	0.993	1.069	0.882	0.822	0.951	0.841	0.851	0.062142	0.756	0.0066363	0.888	0.177075
A0A286ZXA6	Uncharacterized protein OS=Sus scrofa OX=9823 GN=GADD45GIP1	GADD45GIP1	25.771	12.6	4	4	4	1.044	0.947	1.044	0.951	0.964	0.98	0.968	1.051	1.086	0.954	0.24116	1.023	0.65584	1.073	0.122522
A0A286ZXA9	Rho GTPase activating protein 25 OS=Sus scrofa OX=9823 GN=ARHGAP25	ARHGAP25	70.318	55.1	33	60	1
A0A286ZXC2	Polycomb group ring finger 2 OS=Sus scrofa OX=9823 GN=PCGF2	PCGF2	31.533	2.8	1	1	1
A0A286ZXC4	CUE domain containing 2 OS=Sus scrofa OX=9823 GN=CUEDC2	CUEDC2	31.973	11.5	3	3	3
A0A286ZXG1	KH domain containing 4, pre-mRNA splicing factor OS=Sus scrofa OX=9823 GN=KHDC4	KHDC4	40.235	6.3	2	2	2
A0A286ZXH8	Elastase, neutrophil expressed OS=Sus scrofa OX=9823 GN=ELANE	ELANE	27.438	18	3	6	3	0.964	0.719	0.779	1.222	1.17	1.091	0.971	1.049	1.073	1.415	0.0194187	1.256	0.064044	0.888	0.057104
A0A286ZXI1	Glutaryl-CoA dehydrogenase, mitochondrial OS=Sus scrofa OX=9823 GN=GCDH	GCDH	43.687	15.9	5	7	5	1.007	1.048	1.001	1.015	1.001	1.015	0.89	0.995	1.019	0.992	0.62378	0.95	0.29978	0.958	0.40016
A0A286ZXK8	Malonyl-CoA-acyl carrier protein transacylase OS=Sus scrofa OX=9823 GN=MCAT	MCAT	42.298	3.6	1	1	1
A0A286ZXL2	Phosphatidylinositol transfer protein membrane associated 1 OS=Sus scrofa OX=9823 GN=PITPNM1	PITPNM1	132.46	8.1	6	6	6	0.973	0.97	1.002	1.021	1.023	1.068	0.984	0.99	0.985	1.057	0.037497	1.005	0.66874	0.951	0.077064
A0A286ZXM4	Uncharacterized protein OS=Sus scrofa OX=9823 GN=LOC100517129	LOC100517129	38.539	12.2	4	5	4
A0A286ZXP5	MALT1 paracaspase OS=Sus scrofa OX=9823 GN=MALT1	MALT1	88.72	1.8	1	1	1
A0A286ZXU2	Uncharacterized protein OS=Sus scrofa OX=9823 GN=FLNA	FLNA	279.88	54.8	123	523	26	0.986	0.999	0.995	0.996	0.979	1.008	1.026	1.024	1.01	1.001	0.92372	1.027	0.0135366	1.026	0.05988
A0A286ZXZ1	Echinoderm microtubule associated protein like 2 OS=Sus scrofa OX=9823 GN=EML2	EML2	70.633	22.8	13	21	13	0.989	0.976	0.955	1.034	0.977	1.006	0.98	1.025	1.057	1.033	0.16712	1.049	0.1236	1.015	0.62246
A0A286ZY28	Coiled-coil domain-containing protein 25 OS=Sus scrofa OX=9823 GN=CCDC25	CCDC25	24.637	26.4	5	8	5	0.949	1.001	1.025	1.025	0.984	0.981	1.042	0.968	1.033	1.005	0.85174	1.023	0.52602	1.018	0.56086
A0A286ZY30	KH-type splicing regulatory protein OS=Sus scrofa OX=9823 GN=KHSRP	KHSRP	73.343	42.4	28	51	24	1.016	1.055	1.017	0.998	0.975	0.993	1.01	1.004	0.975	0.96	0.048019	0.968	0.119899	1.008	0.58754
A0A286ZY37	Guanine monophosphate synthase OS=Sus scrofa OX=9823 GN=GMPS	GMPS	76.73	26.6	17	24	17	1.003	1.036	1.028	0.935	0.956	0.968	0.988	0.998	1.004	0.932	0.0075421	0.975	0.079205	1.046	0.0159042
A0A286ZY90	Uncharacterized protein OS=Sus scrofa OX=9823 GN=OLFML1	OLFML1	24.708	6	1	1	1
A0A286ZY95	Fibronectin 1 OS=Sus scrofa OX=9823 GN=FN1	FN1	262.32	23.6	46	65	2	0.788	0.88	0.879	1.112	1	1.015	1.128	1.035	1.172	1.228	0.0141974	1.309	0.0065397	1.067	0.26476
A0A286ZY98	RNA polymerase I subunit C OS=Sus scrofa OX=9823 GN=POLR1C	POLR1C	35.041	11.3	3	4	3	1.068	1.105	0.931	1.096	0.95	0.823	0.994	0.863	1.014	0.924	0.44496	0.925	0.34582	1.001	0.96146
A0A286ZYA6	SPG11, spatacsin vesicle trafficking associated OS=Sus scrofa OX=9823 GN=SPG11	SPG11	247.31	1.4	3	3	3	1.03	1.008	1.019	1.016	0.995	0.936	0.965	1.094	0.959	0.964	0.21656	0.987	0.76734	1.024	0.67218
A0A286ZYC5	MAP kinase activating death domain OS=Sus scrofa OX=9823 GN=MADD	MADD	135.73	3.4	3	3	3	1.234	0.894	1.152	1.099	1.118	0.916	0.823	0.949	0.841	0.955	0.7465	0.797	0.110264	0.834	0.081883
A0A286ZYC7	Uncharacterized protein OS=Sus scrofa OX=9823 GN=SPECC1	SPECC1	75.266	1.5	1	2	1
A0A286ZYE0	Uncharacterized protein OS=Sus scrofa OX=9823 GN=ZNF34	ZNF34	59.106	2.5	1	1	1
A0A286ZYE2	ZFP62 zinc finger protein OS=Sus scrofa OX=9823 GN=ZFP62	ZFP62	102.94	1.8	2	5	1
A0A286ZYE7	Heterogeneous nuclear ribonucleoprotein D like OS=Sus scrofa OX=9823 GN=HNRNPDL	HNRNPDL	39.995	20.4	8	11	8	1.03	1.026	0.96	1.012	1.029	1.015	1.011	0.983	1.008	1.013	0.59068	0.995	0.87186	0.982	0.15696
A0A286ZYH9	Formin binding protein 1 like OS=Sus scrofa OX=9823 GN=FNBP1L	FNBP1L	63.54	3.3	2	2	2
A0A286ZYJ2	Uncharacterized protein OS=Sus scrofa OX=9823 GN=LOC102161418	LOC102161418	11.982	16.7	1	1	1
A0A286ZYL1	Ubinuclein 1 OS=Sus scrofa OX=9823 GN=UBN1	UBN1	118.39	0.8	1	1	1
A0A286ZYL7	ATP synthase subunit delta, mitochondrial OS=Sus scrofa OX=9823 GN=ATP5F1D	ATP5F1D	17.475	22.6	3	7	3	1.095	1.108	1.055	1.013	0.939	0.923	0.938	0.933	0.899	0.882	0.0174574	0.85	0.00123757	0.963	0.311
A0A286ZYM2	Matrix AAA peptidase interacting protein 1 OS=Sus scrofa OX=9823 GN=MAIP1	MAIP1	32.746	7.3	2	2	2
A0A286ZYM6	ATP synthase peripheral stalk-membrane subunit b OS=Sus scrofa OX=9823 GN=ATP5PB	ATP5PB	28.626	29.3	10	24	10	1.123	1.059	0.997	0.938	1.015	1.042	0.947	0.958	0.891	0.942	0.27188	0.88	0.035879	0.934	0.153181
A0A286ZYP8	SMG9, nonsense mediated mRNA decay factor OS=Sus scrofa OX=9823 GN=SMG9	SMG9	50.514	1.5	1	1	1
A0A286ZYR0	Sequestosome 1 OS=Sus scrofa OX=9823 GN=SQSTM1	SQSTM1	47.162	26.8	6	11	6	1.044	0.944	0.919	0.916	0.923	0.921	1.004	1.046	1.06	0.949	0.32452	1.07	0.177878	1.127	0.0186229
A0A286ZYS7	SHANK associated RH domain interactor OS=Sus scrofa OX=9823 GN=SHARPIN	SHARPIN	37.838	7.6	2	2	2	1.104	0.999	0.866	0.923	1.091	0.841	1.04	1.031	1.126	0.962	0.71886	1.077	0.36116	1.12	0.2189
A0A286ZYT0	RALY heterogeneous nuclear ribonucleoprotein OS=Sus scrofa OX=9823 GN=RALY	RALY	31.937	32.8	12	22	12	0.976	0.988	0.996	1.015	1.022	1.03	0.982	1.003	1.01	1.036	0.0080832	1.012	0.31906	0.977	0.06552
A0A286ZYT4	RHO family interacting cell polarization regulator 2 OS=Sus scrofa OX=9823 GN=RIPOR2	RIPOR2	67.009	7.4	4	4	4
A0A286ZYU3	GATA zinc finger domain containing 2A OS=Sus scrofa OX=9823 GN=GATAD2A	GATAD2A	65.858	14.2	7	7	6	1.055	0.936	0.947	1.008	0.995	1.006	1.031	0.989	1.053	1.024	0.57646	1.046	0.3376	1.021	0.33346
A0A286ZYU8	10-formyltetrahydrofolate dehydrogenase OS=Sus scrofa OX=9823 GN=ALDH1L1	ALDH1L1	95.121	6.1	5	9	2	0.98	1.047	0.975	0.987	1.106	1.039	1.01	0.993	0.922	1.043	0.35592	0.974	0.50872	0.934	0.190277
A0A286ZYU9	Erbb2 interacting protein OS=Sus scrofa OX=9823 GN=ERBIN	ERBIN	145.85	9.7	11	13	11	0.91	0.972	0.994	0.962	0.96	1.006	1	1.1	1.066	1.018	0.5802	1.101	0.067644	1.081	0.071942
A0A286ZYX8	Fructose-bisphosphate aldolase OS=Sus scrofa OX=9823 GN=ALDOA	ALDOA	39.42	52.5	26	121	19	1.014	0.979	0.982	0.986	0.975	0.977	1.018	1.017	1.027	0.988	0.35084	1.029	0.068001	1.042	0.0008803
A0A286ZYY2	Heterogeneous nuclear ribonucleoprotein A2/B1 OS=Sus scrofa OX=9823 GN=HNRNPA2B1	HNRNPA2B1	37.429	64	20	118	19	1.107	1.064	1.073	0.935	1.007	0.981	0.947	0.951	0.904	0.901	0.0136166	0.864	0.00192098	0.959	0.195805
A0A286ZYY8	MYB binding protein 1a OS=Sus scrofa OX=9823 GN=MYBBP1A	MYBBP1A	170.95	21.3	30	52	30	0.988	1.034	1.022	0.98	0.989	0.989	0.992	1.013	0.973	0.972	0.111317	0.978	0.2896	1.007	0.61166
A0A286ZZ00	1-acyl-sn-glycerol-3-phosphate acyltransferase delta OS=Sus scrofa OX=9823 GN=AGPAT4	AGPAT4	42.233	2.5	1	1	1	1.027	1.098	0.958	0.924	0.994	0.914	0.987	1.123	0.995	0.919	0.150642	1.007	0.91018	1.096	0.139165
A0A286ZZ06	Uncharacterized protein OS=Sus scrofa OX=9823 GN=C12H17orf49	C12H17orf49	20.17	20.5	4	6	4	1.085	0.951	1.064	0.998	1.012	1.025	0.966	1.025	0.877	0.979	0.66372	0.925	0.27094	0.945	0.2726
A0A286ZZ07	PBX homeobox 3 OS=Sus scrofa OX=9823 GN=PBX3	PBX3	38.766	5.1	2	3	1	1.203	1.012	0.975	1.002	0.997	0.976	0.916	0.969	0.978	0.933	0.42066	0.897	0.199284	0.962	0.153102
A0A286ZZ12	2',3'-cyclic-nucleotide 3'-phosphodiesterase OS=Sus scrofa OX=9823 GN=CNP	CNP	44.729	36.5	17	28	17	1.039	1.034	1.066	1.001	1.018	1.002	0.947	0.978	0.937	0.962	0.024816	0.912	0.0044352	0.947	0.0178998
A0A286ZZ16	Serine incorporator 3 OS=Sus scrofa OX=9823 GN=SERINC3	SERINC3	46.974	5.2	2	2	2	1.226	0.933	0.994	1.324	0.828	0.883	0.959	0.843	1.042	0.963	0.7662	0.902	0.3868	0.937	0.78568
A0A286ZZ30	Myosin IXB OS=Sus scrofa OX=9823 GN=MYO9B	MYO9B	249.37	12.4	23	31	23	1.085	1.027	0.989	0.97	1.045	1.059	0.998	0.882	0.952	0.991	0.83046	0.913	0.11198	0.921	0.141776
A0A286ZZ34	Dihydrolipoamide acetyltransferase component of pyruvate dehydrogenase complex OS=Sus scrofa OX=9823 GN=DBT	DBT	55	7.8	4	4	4
A0A286ZZ51	RNA binding motif protein 47 OS=Sus scrofa OX=9823 GN=RBM47	RBM47	63.903	12.7	5	5	5	1.01	0.97	0.968	0.964	1.003	0.987	1.03	1.013	1.046	1.002	0.91302	1.048	0.048104	1.046	0.038876
A0A286ZZ61	Tyrosine-protein kinase OS=Sus scrofa OX=9823 GN=SYK	SYK	71.651	29.9	16	28	16	1.003	1.068	1.016	1.006	1.011	0.981	0.956	1.008	0.986	0.971	0.24534	0.956	0.138984	0.984	0.41594
A0A286ZZ62	YEATS domain containing 4 OS=Sus scrofa OX=9823 GN=YEATS4	YEATS4	26.543	7.9	2	2	2
A0A286ZZ81	Mediator of RNA polymerase II transcription subunit 4 OS=Sus scrofa OX=9823 GN=MED4	MED4	29.791	5.2	1	1	1	0.993	1.028	1.216	0.983	0.888	0.913	0.923	0.857	1.203	0.86	0.100839	0.922	0.50284	1.071	0.61108
A0A286ZZ94	RBR-type E3 ubiquitin transferase OS=Sus scrofa OX=9823 GN=ARIH2	ARIH2	49.646	10.5	3	4	3	0.989	1.011	1.06	0.984	0.956	1.129	0.998	0.994	0.902	1.003	0.99068	0.946	0.22026	0.943	0.40238
A0A286ZZA4	RNA binding motif protein 39 OS=Sus scrofa OX=9823 GN=RBM39	RBM39	55.777	21.1	9	13	8	1.118	1.065	1.097	0.956	0.968	0.961	0.983	0.971	0.967	0.88	0.00092319	0.891	0.00150284	1.012	0.112637
A0A286ZZB2	Syntaxin binding protein 1 OS=Sus scrofa OX=9823 GN=STXBP1	STXBP1	67.584	11.8	6	9	5	1.067	0.95	1.028	1.007	0.935	1.049	0.925	1.094	0.889	0.982	0.72888	0.955	0.53484	0.972	0.68762
A0A286ZZB4	Oxysterol-binding protein OS=Sus scrofa OX=9823 GN=OSBPL8	OSBPL8	94.155	7.3	4	4	4	1.073	1.019	0.894	1.043	1.097	0.987	1.045	0.878	0.979	1.047	0.48296	0.972	0.72396	0.928	0.26726
A0A286ZZB7	Histone cluster 1 H1 family member e OS=Sus scrofa OX=9823 GN=HIST1H1E	HIST1H1E	21.993	32.9	11	25	3	0.93	1.045	1.016	1.158	1.07	1.194	0.892	0.903	0.804	1.144	0.048321	0.869	0.050723	0.759	0.0050168
A0A286ZZG8	Glucocorticoid modulatory element binding protein 1 OS=Sus scrofa OX=9823 GN=GMEB1	GMEB1	52.919	3.7	2	2	1
A0A286ZZI6	Uncharacterized protein OS=Sus scrofa OX=9823 GN=LRRFIP1	LRRFIP1	44.626	23.4	8	19	8	0.881	0.973	0.987	1.002	1.019	1.065	1	1.018	0.991	1.086	0.105237	1.059	0.184221	0.975	0.27582
A0A286ZZK2	Leukocyte surface antigen CD47 OS=Sus scrofa OX=9823 GN=CD47	CD47	30.398	8.3	2	4	2	0.894	0.947	0.967	1.011	1.014	0.979	1.02	1.109	1.072	1.07	0.0595	1.14	0.017885	1.066	0.078043
A0A286ZZM0	CTD small phosphatase like 2 OS=Sus scrofa OX=9823 GN=CTDSPL2	CTDSPL2	49.647	2.7	1	1	1	0.997	0.999	1.047	0.935	1.166	0.993	0.948	0.934	0.99	1.017	0.863	0.944	0.070858	0.928	0.36036
A0A286ZZM4	Exocyst complex component 2 OS=Sus scrofa OX=9823 GN=EXOC2	EXOC2	99.723	12.4	13	16	13	1.009	1.025	0.98	0.98	1.045	0.938	1.064	1.02	1.071	0.983	0.6269	1.047	0.086283	1.065	0.142736
A0A286ZZM7	Thioredoxin domain containing 17 OS=Sus scrofa OX=9823 GN=TXNDC17	TXNDC17	14.078	11.4	1	2	1
A0A286ZZM9	AE binding protein 1 OS=Sus scrofa OX=9823 GN=AEBP1	AEBP1	126.02	4.3	4	4	4	0.988	0.956	0.905	0.957	1.036	1.038	1.124	1.006	1.004	1.064	0.17012	1.1	0.104743	1.034	0.51546
A0A286ZZP2	Phosphatidylinositol specific phospholipase C X domain containing 3 OS=Sus scrofa OX=9823 GN=PLCXD3	PLCXD3	36.372	12.8	3	3	3	1.218	1.099	0.928	1.029	1.02	1.095	0.841	0.937	0.863	0.969	0.76876	0.814	0.079121	0.84	0.0114434
A0A286ZZP8	Signal recognition particle subunit SRP72 OS=Sus scrofa OX=9823 GN=SRP72	SRP72	72.001	29.5	17	25	17	1.022	0.975	1.013	0.963	0.989	1.012	1.024	1.003	0.976	0.985	0.49148	0.998	0.9137	1.013	0.54816
A0A286ZZQ7	Cerebellar degeneration related protein 2 like OS=Sus scrofa OX=9823 GN=CDR2L	CDR2L	46.453	4.1	2	3	2	0.953	1.158	0.951	1.01	1.056	1.055	0.968	0.99	0.868	1.019	0.7461	0.923	0.37064	0.905	0.0801
A0A286ZZR7	Uncharacterized protein OS=Sus scrofa OX=9823	---	12.416	9.6	1	2	1	0.886	0.899	0.923	1.083	1.226	1.183	0.946	0.933	0.93	1.29	0.0028408	1.037	0.048242	0.804	0.028362
A0A286ZZT0	Nicotinamide nucleotide transhydrogenase OS=Sus scrofa OX=9823 GN=NNT	NNT	99.791	26.1	24	44	1	1.05	1.011	1.126	0.921	0.889	0.851	1.016	1.11	1.043	0.835	0.0099021	0.994	0.90246	1.191	0.0074049
A0A286ZZT7	General transcription factor IIF subunit 2 OS=Sus scrofa OX=9823 GN=GTF2F2	GTF2F2	28.459	12.9	4	4	4	1.024	0.896	0.843	1.055	0.901	0.953	1.068	1.062	1.225	1.053	0.51424	1.214	0.0577	1.153	0.095678
A0A286ZZU8	Mediator of RNA polymerase II transcription subunit 20 OS=Sus scrofa OX=9823 GN=MED20	MED20	23.196	4.2	1	1	1	1.028	1.025	1.029	1.047	1.073	1.008	0.899	0.898	1.005	1.015	0.50982	0.909	0.122536	0.896	0.055444
A0A286ZZV3	Dual adaptor of phosphotyrosine and 3-phosphoinositides 1 OS=Sus scrofa OX=9823 GN=DAPP1	DAPP1	26.33	3.9	1	1	1	1.104	0.948	1.016	1.013	0.953	0.909	1.063	0.995	1.021	0.937	0.3019	1.004	0.9198	1.071	0.133242
A0A286ZZW0	BCR, RhoGEF and GTPase activating protein OS=Sus scrofa OX=9823 GN=BCR	BCR	140.28	4.6	5	7	3	0.964	0.806	1.184	1.045	0.89	0.83	1.178	1.262	0.862	0.936	0.677	1.118	0.53162	1.194	0.28098
A0A287A009	Ephrin-B2 OS=Sus scrofa OX=9823 GN=EFNB2	EFNB2	37.146	3.6	1	1	1	1.121	1.147	1.008	0.891	1.022	0.859	1.095	0.94	0.929	0.846	0.063759	0.905	0.20064	1.069	0.4215
A0A287A013	Uncharacterized protein OS=Sus scrofa OX=9823	---	12.442	71.6	6	18	2	1.307	1.216	1.132	0.828	0.903	0.85	0.943	0.923	1.005	0.706	0.0020647	0.785	0.0078606	1.112	0.042416
A0A287A018	Protein C10 OS=Sus scrofa OX=9823 GN=C12orf57	C12orf57	13.138	7.1	1	1	1
A0A287A024	Acetylserotonin O-methyltransferase like OS=Sus scrofa OX=9823 GN=ASMTL	ASMTL	64.85	5.7	2	2	2
A0A287A034	Low affinity immunoglobulin gamma Fc region receptor III precursor OS=Sus scrofa OX=9823 GN=FCGR3A	FCGR3A	28.599	29.4	6	11	6	0.951	0.928	0.921	1.011	1.04	0.995	1.094	1.013	1.058	1.088	0.0064769	1.13	0.0073357	1.039	0.21412
A0A287A035	Uncharacterized protein OS=Sus scrofa OX=9823 GN=LOC102162880	LOC102162880	32.801	7.4	2	2	2
A0A287A038	BMP2 inducible kinase OS=Sus scrofa OX=9823 GN=BMP2K	BMP2K	118.28	10.2	8	8	8	1.05	1.064	0.973	0.965	0.941	0.972	1.004	1.041	1.053	0.932	0.078479	1.004	0.90174	1.076	0.0133986
A0A287A043	Meis homeobox 1 OS=Sus scrofa OX=9823 GN=MEIS1	MEIS1	43.016	5.9	2	3	2	1.111	1.011	0.988	0.934	0.987	0.996	0.984	1.027	0.984	0.938	0.199403	0.963	0.3972	1.027	0.34114
A0A287A044	Aspartate aminotransferase OS=Sus scrofa OX=9823 GN=GOT2	GOT2	43.681	44	18	38	18	0.974	1.004	1.019	0.981	0.993	0.985	0.999	1.034	1.018	0.987	0.41186	1.018	0.34092	1.031	0.044718
A0A287A053	Neutral sphingomyelinase activation associated factor OS=Sus scrofa OX=9823 GN=NSMAF	NSMAF	104.31	4.3	4	6	4	0.948	0.973	1.128	0.941	1.047	0.891	0.979	1.014	1.087	0.944	0.475	1.01	0.85488	1.07	0.29014
A0A287A073	Dual specificity tyrosine phosphorylation regulated kinase 1A OS=Sus scrofa OX=9823 GN=DYRK1A	DYRK1A	82.777	4.5	4	5	4	1.05	0.921	0.945	1.007	1.032	1.016	0.957	1.07	1.028	1.048	0.30276	1.048	0.4136	1	0.97738
A0A287A083	Purinergic receptor P2Y13 OS=Sus scrofa OX=9823 GN=P2RY13	P2RY13	37.975	5.1	2	3	2	1.047	0.817	0.944	0.967	0.944	0.942	1.054	1.058	1.252	1.016	0.7995	1.198	0.117201	1.179	0.1064
A0A287A088	Transmembrane protein 199 OS=Sus scrofa OX=9823 GN=TMEM199	TMEM199	23.098	8.7	2	2	2	1.128	1.081	0.964	0.998	0.841	1.013	0.882	1.104	1.021	0.899	0.22806	0.948	0.5276	1.054	0.58884
A0A287A096	Eukaryotic translation initiation factor 2 subunit 1 OS=Sus scrofa OX=9823 GN=EIF2S1	EIF2S1	36.108	42.2	15	26	15	1.003	0.991	1.025	0.979	0.984	1	0.997	1.023	1.007	0.981	0.187684	1.003	0.83892	1.022	0.096097
A0A287A0A4	Lysophospholipid acyltransferase LPCAT4 OS=Sus scrofa OX=9823 GN=LPCAT4	LPCAT4	53.656	2.5	1	1	1	0.793	1.095	0.966	1.052	0.86	1.097	0.997	1.103	1.047	1.054	0.66532	1.103	0.3435	1.046	0.5723
A0A287A0A6	Collagen type VI alpha 6 chain OS=Sus scrofa OX=9823 GN=COL6A6	COL6A6	228.58	12.6	25	41	24	1.103	1.065	1.046	1.068	1.083	1.054	0.838	0.81	0.842	0.997	0.88776	0.775	0.00020431	0.777	6.1906e-05
A0A287A0B1	Metaxin 3 OS=Sus scrofa OX=9823 GN=MTX3	MTX3	27.942	3.2	1	1	1
A0A287A0G4	Vasohibin 1 OS=Sus scrofa OX=9823 GN=VASH1	VASH1	35.794	3.8	1	1	1	1.048	0.986	1.079	1.11	0.917	1.118	1.031	0.842	0.882	1.01	0.9273	0.885	0.133815	0.876	0.21294
A0A287A0G9	Eukaryotic translation initiation factor 3 subunit K OS=Sus scrofa OX=9823 GN=EIF3K	EIF3K	24.983	27.5	5	8	5	1.049	1.08	1.005	1.022	1.042	0.975	0.925	0.929	0.907	0.97	0.34522	0.881	0.0046814	0.909	0.0105158
A0A287A0I0	Protein phosphatase 3 regulatory subunit B, alpha OS=Sus scrofa OX=9823 GN=PPP3R1	PPP3R1	16.945	25.3	3	4	3	0.906	1.039	0.993	0.992	0.937	1.047	1.002	1.071	1.025	1.013	0.807	1.054	0.29236	1.041	0.33798
A0A287A0I8	Drebrin 1 OS=Sus scrofa OX=9823 GN=DBN1	DBN1	69.126	6.3	3	3	3	0.952	1.037	1.027	0.86	0.882	0.933	1.069	1.03	1.22	0.887	0.029657	1.1	0.181497	1.241	0.0196809
A0A287A0J5	Chromodomain helicase DNA binding protein 3 OS=Sus scrofa OX=9823 GN=CHD3	CHD3	218.16	5.4	9	14	5	1.059	1.095	1.053	0.885	1.051	1.241	0.617	1.03	0.992	0.991	0.86646	0.823	0.3142	0.831	0.3521
A0A287A0P2	Small glutamine rich tetratricopeptide repeat containing beta OS=Sus scrofa OX=9823 GN=SGTB	SGTB	33.46	3.3	1	1	1
A0A287A0P7	Interferon regulatory factor 2 binding protein like OS=Sus scrofa OX=9823 GN=IRF2BPL	IRF2BPL	78.687	10	6	7	4	0.891	1.052	0.994	1.101	0.968	0.867	1.094	0.99	1.045	1	0.9755	1.065	0.3162	1.066	0.41738
A0A287A0R0	TIA1 cytotoxic granule associated RNA binding protein OS=Sus scrofa OX=9823 GN=TIA1	TIA1	42.907	11.4	5	9	3	0.896	1.058	1.192	0.854	0.804	1.06	1.068	0.994	1.075	0.864	0.2814	0.997	0.97142	1.154	0.162084
A0A287A0R5	Kynurenine formamidase OS=Sus scrofa OX=9823 GN=AFMID	AFMID	34.867	16	6	9	6	1.086	0.98	0.99	0.964	0.978	1.057	1.019	0.978	0.969	0.981	0.69086	0.971	0.46658	0.989	0.76334
A0A287A0S3	Family with sequence similarity 111 member A OS=Sus scrofa OX=9823 GN=FAM111A	FAM111A	66.67	9.2	6	6	6	0.943	0.995	1.152	0.943	0.966	0.94	0.998	0.965	1.029	0.922	0.3276	0.968	0.66798	1.05	0.07582
A0A287A0U2	Pitrilysin metallopeptidase 1 OS=Sus scrofa OX=9823 GN=PITRM1	PITRM1	101.18	10.2	9	9	9	1.065	1.069	1.105	0.965	0.966	0.954	0.93	0.901	1.084	0.891	0.00073608	0.9	0.13596	1.01	0.91324
A0A287A0V6	Pyrroline-5-carboxylate reductase OS=Sus scrofa OX=9823 GN=PYCR1	PYCR1	33.247	12.2	3	4	1
A0A287A0V7	Pleckstrin and Sec7 domain containing OS=Sus scrofa OX=9823 GN=PSD	PSD	104.93	0.7	1	1	1
A0A287A0W1	Sestrin 3 OS=Sus scrofa OX=9823 GN=SESN3	SESN3	57.309	2.2	1	1	1
A0A287A0X6	Laminin subunit alpha 2 OS=Sus scrofa OX=9823 GN=LAMA2	LAMA2	211	2.3	4	4	4	0.796	0.862	1.061	0.978	0.923	1.045	1.035	1.215	1.098	1.083	0.405	1.231	0.094142	1.136	0.097615
A0A287A0Z5	Neuromodulin OS=Sus scrofa OX=9823 GN=GAP43	GAP43	25.083	8.6	2	3	2	0.93	0.945	0.966	0.95	1.019	0.905	1	1.057	1.241	1.012	0.78632	1.161	0.091795	1.148	0.140442
A0A287A113	Spectrin beta chain OS=Sus scrofa OX=9823 GN=SPTB	SPTB	269.89	20.4	42	55	37	0.968	0.953	0.949	1.04	0.998	1.059	1.007	0.991	1.017	1.079	0.0150188	1.051	0.00698	0.974	0.23652
A0A287A139	Casein kinase 1 gamma 1 OS=Sus scrofa OX=9823 GN=CSNK1G1	CSNK1G1	45.331	2.3	1	1	1	0.966	0.97	1.006	0.982	1.002	1.126	0.96	0.917	1.081	1.057	0.29332	1.005	0.95326	0.951	0.47888
A0A287A140	Synaptobrevin homolog YKT6 OS=Sus scrofa OX=9823 GN=YKT6	YKT6	18.377	30.7	5	10	5	0.915	1.013	1.002	1.028	1.009	1.009	0.997	1.017	1.014	1.04	0.2921	1.033	0.36036	0.994	0.53634
A0A287A155	Uncharacterized protein OS=Sus scrofa OX=9823	---	6.5954	15.5	1	2	1	0.948	1.187	0.946	1.008	0.949	1.019	0.989	1.017	0.948	0.966	0.72734	0.959	0.66252	0.993	0.81922
A0A287A164	Exocyst complex component 3 OS=Sus scrofa OX=9823 GN=EXOC3	EXOC3	86.214	10.1	8	10	8	0.986	1.033	1.003	0.973	1.025	1.028	1.03	1.054	0.882	1.001	0.96024	0.981	0.72666	0.98	0.7178
A0A287A168	Adhesion G protein-coupled receptor E1 OS=Sus scrofa OX=9823 GN=ADGRE1	ADGRE1	102.7	7.8	6	8	6	1.534	1.136	0.905	0.89	1	0.927	0.853	0.942	0.757	0.788	0.23992	0.714	0.127223	0.906	0.23018
A0A287A181	Erythrocyte membrane protein band 4.1 like 3 OS=Sus scrofa OX=9823 GN=EPB41L3	EPB41L3	83.291	28.2	18	27	14	1.104	1.05	1.088	0.929	0.928	0.902	1.025	0.977	1.041	0.851	0.0008175	0.939	0.058716	1.103	0.0102988
A0A287A189	Uncharacterized protein OS=Sus scrofa OX=9823 GN=LOC100739755	LOC100739755	13.004	11.8	1	1	1	1.231	0.853	0.708	0.8	1.155	1.15	0.918	1.214	1.021	1.112	0.58904	1.129	0.47866	1.015	0.88376
A0A287A1A4	ArfGAP with RhoGAP domain, ankyrin repeat and PH domain 3 OS=Sus scrofa OX=9823 GN=ARAP3	ARAP3	143.52	2.3	3	3	1	0.878	0.882	0.969	1.118	1.037	1.056	0.95	1.156	0.974	1.177	0.014264	1.129	0.164579	0.959	0.531
A0A287A1A9	Diacylglycerol kinase OS=Sus scrofa OX=9823 GN=DGKZ	DGKZ	127.39	17.3	15	17	15	0.991	1.01	0.964	0.99	0.992	0.988	1.013	1.007	0.986	1.002	0.9033	1.014	0.43082	1.012	0.28474
A0A287A1C4	Non-specific serine/threonine protein kinase OS=Sus scrofa OX=9823 GN=RPS6KA5	RPS6KA5	101.23	8.2	8	9	8	0.961	1.012	1.035	1.026	1.044	0.937	0.943	0.975	0.983	1	0.98194	0.964	0.23	0.965	0.385
A0A287A1C6	NUMB, endocytic adaptor protein OS=Sus scrofa OX=9823 GN=NUMB	NUMB	61.858	11.8	6	7	6	0.933	0.85	0.9	1.062	0.975	1.014	1.185	1.032	1.065	1.137	0.024741	1.223	0.0158556	1.076	0.21336
A0A287A1E1	Uncharacterized protein OS=Sus scrofa OX=9823 GN=TRIAP1	TRIAP1	8.7288	55.3	4	6	4	1.082	1.053	0.995	1.03	0.962	0.953	1.02	0.953	1.002	0.941	0.154659	0.95	0.188921	1.01	0.76186
A0A287A1E7	Eukaryotic translation initiation factor 4E family member 3 OS=Sus scrofa OX=9823 GN=EIF4E3	EIF4E3	24.287	11.7	2	2	2
A0A287A1F4	Mitochondrial Rho GTPase OS=Sus scrofa OX=9823 GN=RHOT1	RHOT1	67.938	6.1	2	2	2	0.982	1.043	0.943	0.863	0.924	1.074	1.023	1.132	1.035	0.964	0.60224	1.075	0.172357	1.115	0.19512
A0A287A1G6	Hexokinase-1 OS=Sus scrofa OX=9823 GN=HK1	HK1	102.29	36.5	35	64	31	1.04	1.036	1.013	0.994	1.013	0.955	0.973	0.967	1.018	0.959	0.092984	0.958	0.074575	0.999	0.95854
A0A287A1H3	40S ribosomal protein S9 OS=Sus scrofa OX=9823 GN=RPS9	RPS9	22.591	49.5	13	25	13	1.022	1.025	0.951	0.996	1.037	1.01	0.957	0.955	0.948	1.015	0.6027	0.954	0.199899	0.94	0.0070567
A0A287A1I6	Protocadherin 18 OS=Sus scrofa OX=9823 GN=PCDH18	PCDH18	125.97	1.3	1	1	1
A0A287A1J1	Exonuclease 3'-5' domain containing 2 OS=Sus scrofa OX=9823 GN=EXD2	EXD2	60.466	2.6	1	1	1
A0A287A1J2	COP1, E3 ubiquitin ligase OS=Sus scrofa OX=9823 GN=COP1	COP1	78.507	1.1	1	1	1	1.065	0.982	1.068	0.996	0.921	1.035	1.001	0.934	1.015	0.948	0.28582	0.947	0.22274	0.999	0.99716
A0A287A1J5	TraB domain containing OS=Sus scrofa OX=9823 GN=TRABD	TRABD	36.142	3.8	1	1	1	0.897	0.963	1.004	1.057	0.987	0.906	1.061	1.053	1.081	1.03	0.63204	1.116	0.030936	1.083	0.145405
A0A287A1J6	Uncharacterized protein OS=Sus scrofa OX=9823	---	12.241	33.9	4	12	2	1.016	1.096	1.098	1.001	0.991	1.002	1.001	0.885	0.93	0.933	0.116037	0.877	0.040257	0.941	0.22394
A0A287A1K2	Arylsulfatase B OS=Sus scrofa OX=9823 GN=ARSB	ARSB	56.023	8.6	4	4	4	1.051	0.851	0.948	1.1	1.066	1.091	1.037	1.015	0.866	1.143	0.156203	1.024	0.78664	0.896	0.121344
A0A287A1K8	Proteasome maturation protein OS=Sus scrofa OX=9823 GN=POMP	POMP	15.202	10.4	1	1	1	0.994	1.014	0.927	0.989	0.98	0.963	1.174	0.966	1.004	0.999	0.99074	1.071	0.37142	1.072	0.38538
A0A287A1Q9	Phosphatidylinositol 3-kinase catalytic subunit type 3 OS=Sus scrofa OX=9823 GN=PIK3C3	PIK3C3	97.466	10.4	8	10	8	1.096	1.013	0.954	1.035	0.918	0.884	1.135	0.99	0.995	0.926	0.28204	1.019	0.7793	1.1	0.21798
A0A287A1S5	Uncharacterized protein OS=Sus scrofa OX=9823 GN=ARHGEF18	ARHGEF18	149.45	4.8	4	4	4
A0A287A1T3	Uncharacterized protein OS=Sus scrofa OX=9823 GN=SEPT5	SEPT5	44.814	24.1	10	15	7	1.006	0.975	1.032	1.02	1.004	0.954	1.026	1.037	1.023	0.988	0.67328	1.024	0.22648	1.036	0.155415
A0A287A1T8	Uncharacterized protein OS=Sus scrofa OX=9823 GN=TUT1	TUT1	86.231	5.6	3	4	3	1.267	1.441	1.047	0.778	0.746	0.845	1.03	0.8	1.058	0.631	0.0104432	0.769	0.111562	1.219	0.117202
A0A287A1V9	Dehydrogenase/reductase 7B OS=Sus scrofa OX=9823 GN=DHRS7B	DHRS7B	33.138	10	3	4	3	1.038	0.902	1.049	1.038	1.008	0.957	0.948	1.057	1.026	1.005	0.91108	1.014	0.80738	1.009	0.83764
A0A287A1Y1	TAP binding protein OS=Sus scrofa OX=9823 GN=TAPBP	TAPBP	54.542	6.4	2	6	2	0.879	1.082	1.159	0.969	0.986	1.05	0.958	0.958	0.975	0.963	0.73534	0.927	0.49194	0.962	0.20324
A0A287A204	Palmdelphin OS=Sus scrofa OX=9823 GN=PALMD	PALMD	60.803	13.6	6	7	6	1.054	0.952	0.96	1.006	1.016	1.035	1.024	0.961	0.941	1.031	0.4062	0.987	0.76634	0.957	0.172301
A0A287A215	G protein-coupled receptor kinase OS=Sus scrofa OX=9823 GN=GRK6	GRK6	64.175	12.5	6	7	5	0.968	1.006	0.962	0.953	1.025	1.017	0.973	1.063	1.049	1.02	0.50868	1.051	0.188281	1.03	0.45948
A0A287A225	Diphosphomevalonate decarboxylase OS=Sus scrofa OX=9823 GN=MVD	MVD	38.215	6.3	2	2	2	0.959	1.078	1.173	0.975	1.05	0.917	1.042	0.88	0.924	0.917	0.29166	0.887	0.195658	0.967	0.6198
A0A287A227	Transmembrane and tetratricopeptide repeat containing 3 OS=Sus scrofa OX=9823 GN=TMTC3	TMTC3	98.415	3.3	3	4	3	1.018	1.014	1.036	0.942	0.957	0.976	1.036	1.003	1.033	0.937	0.0059564	1.001	0.92434	1.069	0.010417
A0A287A229	EH domain containing 1 OS=Sus scrofa OX=9823 GN=EHD1	EHD1	60.569	46.1	24	56	18	1	0.989	1.009	0.999	0.999	0.989	1.023	1.02	0.981	0.996	0.61406	1.009	0.59464	1.012	0.43238
A0A287A233	Arrestin beta 2 OS=Sus scrofa OX=9823 GN=ARRB2	ARRB2	46.087	30.1	10	13	9	0.921	0.926	1.015	0.95	1.01	0.994	1.066	1.105	1.005	1.032	0.4258	1.11	0.06762	1.075	0.0957
A0A287A262	Glutamyl-tRNA synthetase 2, mitochondrial OS=Sus scrofa OX=9823 GN=EARS2	EARS2	48	2.3	1	1	1
A0A287A267	Mitogen-activated protein kinase kinase kinase kinase OS=Sus scrofa OX=9823 GN=MAP4K3	MAP4K3	91.744	4.8	3	3	2	0.977	1.034	0.993	0.853	1.009	1.017	1.034	1.149	0.952	0.958	0.48948	1.044	0.52138	1.089	0.34066
A0A287A275	Tubulin beta chain OS=Sus scrofa OX=9823 GN=TUBB4B	TUBB4B	49.83	43.8	15	230	1	1.047	1.021	1.058	0.98	0.958	0.994	0.961	0.94	1.011	0.938	0.0131358	0.932	0.041182	0.993	0.77998
A0A287A284	Uncharacterized protein OS=Sus scrofa OX=9823	---	12.362	12.1	3	9	3	0.983	0.964	0.972	0.994	1.005	1.035	1.109	0.974	1.019	1.039	0.044501	1.063	0.2626	1.022	0.6289
A0A287A292	Tyrosine-protein kinase OS=Sus scrofa OX=9823 GN=TYK2	TYK2	125.86	3	3	5	2	0.926	0.963	1.053	0.974	1.009	0.971	1.141	0.894	1.069	1.004	0.89952	1.055	0.57724	1.051	0.5801
A0A287A293	C-terminal binding protein 1 OS=Sus scrofa OX=9823 GN=CTBP1	CTBP1	40.434	23	8	12	4	1.011	1.016	0.987	0.943	1.004	0.922	1.026	1.16	0.954	0.952	0.138564	1.042	0.58036	1.094	0.23342
A0A287A2A0	Schlafen family member 14 OS=Sus scrofa OX=9823 GN=SLFN14	SLFN14	101.17	2.4	2	2	2
A0A287A2A2	Uncharacterized protein OS=Sus scrofa OX=9823 GN=TIMM10B	TIMM10B	11.602	15.5	1	1	1
A0A287A2C8	Uncharacterized protein OS=Sus scrofa OX=9823 GN=CLASRP	CLASRP	24.411	5.3	1	1	1
A0A287A2D9	Family with sequence similarity 120B OS=Sus scrofa OX=9823 GN=FAM120B	FAM120B	94.186	11.8	6	6	6	0.964	1.007	0.994	0.942	1.042	0.93	1.037	0.949	1.142	0.983	0.65378	1.055	0.40774	1.073	0.34254
A0A287A2F4	Chromosome 18 open reading frame 25 OS=Sus scrofa OX=9823 GN=C18orf25	C18orf25	37.113	3.2	1	2	1	0.873	0.961	0.994	1.102	1.107	1.044	1	0.992	0.935	1.15	0.03086	1.035	0.46812	0.9	0.020317
A0A287A2F8	WD repeat domain 35 OS=Sus scrofa OX=9823 GN=WDR35	WDR35	121.83	0.8	1	1	1
A0A287A2G3	Sorting nexin 7 OS=Sus scrofa OX=9823 GN=SNX7	SNX7	41.968	3.1	1	1	1
A0A287A2G6	Glutathione peroxidase OS=Sus scrofa OX=9823 GN=GPX7	GPX7	34.56	7.6	3	3	3	1.098	1.055	1.056	0.851	0.963	0.929	1.029	1.017	1.018	0.855	0.0154429	0.955	0.028137	1.117	0.093622
A0A287A2I6	Kinase suppressor of ras 1 OS=Sus scrofa OX=9823 GN=KSR1	KSR1	97.572	5.6	4	4	4
A0A287A2J3	Cysteinyl-tRNA synthetase 2, mitochondrial OS=Sus scrofa OX=9823 GN=CARS2	CARS2	61.101	7.2	3	4	3	1.122	0.966	1.013	0.911	0.84	0.988	0.974	0.99	1.22	0.883	0.125598	1.027	0.7998	1.162	0.162978
A0A287A2J4	Ubiquitin like 4A OS=Sus scrofa OX=9823 GN=UBL4A	UBL4A	21.712	6.2	1	1	1
A0A287A2J9	Cullin 3 OS=Sus scrofa OX=9823 GN=CUL3	CUL3	88.958	27.5	20	30	20	1.005	0.972	0.988	1.021	0.985	0.996	1	1.005	0.988	1.012	0.43644	1.009	0.43368	0.997	0.81638
A0A287A2K0	Tyrosine-protein phosphatase non-receptor type OS=Sus scrofa OX=9823 GN=PTPN1	PTPN1	46.338	29.6	10	13	10	0.983	1.003	0.977	0.964	0.989	1.027	0.997	1.016	1.031	1.006	0.79912	1.027	0.098098	1.021	0.35962
A0A287A2K8	Ankyrin repeat and LEM domain containing 2 OS=Sus scrofa OX=9823 GN=ANKLE2	ANKLE2	96.336	2.7	2	2	2	0.945	1.01	1.003	1.136	0.956	0.934	1.014	1	1.015	1.023	0.78228	1.024	0.32734	1.001	0.9447
A0A287A2L0	ADP ribosylation factor like GTPase 8A OS=Sus scrofa OX=9823 GN=ARL8A	ARL8A	21.416	28.5	5	8	4	0.887	1.009	0.966	0.987	1.043	1.007	1.084	0.942	1.113	1.061	0.21528	1.097	0.22816	1.034	0.60198
A0A287A2N4	Sterile alpha motif domain containing 1 OS=Sus scrofa OX=9823 GN=SAMD1	SAMD1	45.846	6.3	3	3	3
A0A287A2N5	Dedicator of cytokinesis 1 OS=Sus scrofa OX=9823 GN=DOCK1	DOCK1	214.88	6.4	12	13	11	0.984	1.007	1.032	1.006	0.963	1.012	0.973	1.023	1.032	0.986	0.5371	1.002	0.95072	1.016	0.55396
A0A287A2Q1	VPS8, CORVET complex subunit OS=Sus scrofa OX=9823 GN=VPS8	VPS8	145.15	5.2	6	6	6
A0A287A2Q7	Collagen type II alpha 1 chain OS=Sus scrofa OX=9823 GN=COL2A1	COL2A1	134.29	5.4	6	11	6	1.042	1.062	0.955	1.027	1.052	0.948	0.932	0.949	1.009	0.99	0.82934	0.945	0.23716	0.955	0.31062
A0A287A2Q9	Phosphoinositide-3-kinase regulatory subunit 4 OS=Sus scrofa OX=9823 GN=PIK3R4	PIK3R4	133.24	7.7	8	11	8	1.178	1.046	0.98	1.088	0.924	0.902	1.033	0.943	1.002	0.909	0.29766	0.929	0.30372	1.022	0.72374
A0A287A2R0	Protein phosphatase 4 regulatory subunit 2 OS=Sus scrofa OX=9823 GN=PPP4R2	PPP4R2	42.48	4.5	2	2	2	0.942	0.908	1.089	0.994	0.962	1.007	1.08	1.015	1.014	1.008	0.85576	1.058	0.37652	1.049	0.127044
A0A287A2R6	Diphthine--ammonia ligase OS=Sus scrofa OX=9823 GN=DPH6	DPH6	30.127	7.1	2	2	2	1.208	0.938	1.032	1.077	0.956	0.876	0.929	0.986	1.028	0.915	0.41374	0.926	0.41458	1.012	0.84006
A0A287A2R9	Tyrosine 3-monooxygenase/tryptophan 5-monooxygenase activation protein epsilon OS=Sus scrofa OX=9823 GN=YWHAE	YWHAE	29.174	62	17	102	14	1.023	1.015	0.998	1.003	0.998	0.98	0.999	1.017	0.968	0.982	0.14602	0.983	0.34188	1.001	0.96046
A0A287A2U0	Splicing regulatory glutamic acid and lysine rich protein 1 OS=Sus scrofa OX=9823 GN=SREK1	SREK1	60.154	7.6	3	6	3
A0A287A2U6	Cardiomyopathy-associated protein 5 OS=Sus scrofa OX=9823 GN=CMYA5	CMYA5	397.29	0.4	1	1	1
A0A287A2U7	Deoxyribonuclease OS=Sus scrofa OX=9823 GN=DNASE1L1	DNASE1L1	29.628	16.2	5	5	5	2.124	1.289	0.646	0.592	0.833	0.879	1.087	0.614	1.124	0.568	0.2702	0.696	0.51124	1.226	0.47472
A0A287A2V3	Diacylglycerol kinase OS=Sus scrofa OX=9823 GN=DGKE	DGKE	60.653	3.9	2	2	2	1.002	1	1.062	0.999	0.93	0.886	1.015	1.049	1.073	0.919	0.099478	1.024	0.40542	1.114	0.046675
A0A287A2V4	Abhydrolase domain containing 6 OS=Sus scrofa OX=9823 GN=ABHD6	ABHD6	33.088	15.5	4	5	4	0.984	1.108	1.041	1.077	0.944	0.998	0.905	0.98	0.975	0.964	0.50708	0.913	0.101902	0.947	0.31162
A0A287A2Z1	Prune exopolyphosphatase 1 OS=Sus scrofa OX=9823 GN=PRUNE1	PRUNE1	43.991	20.5	6	10	6	0.955	0.974	0.941	0.987	0.948	1.028	1.038	0.99	1.113	1.032	0.28392	1.094	0.065675	1.06	0.23452
A0A287A303	Coiled-coil domain containing 117 OS=Sus scrofa OX=9823 GN=CCDC117	CCDC117	25.137	3.9	1	1	1	0.853	0.972	0.933	1.055	1.075	0.95	1.032	1.199	0.948	1.117	0.1125	1.153	0.15284	1.032	0.737
A0A287A309	Formin binding protein 4 OS=Sus scrofa OX=9823 GN=FNBP4	FNBP4	100.89	5.4	4	5	4	0.958	1	1.005	1.163	1.005	0.957	0.989	1.124	0.841	1.055	0.4551	0.997	0.91402	0.945	0.59042
A0A287A328	Uncharacterized protein OS=Sus scrofa OX=9823 GN=RRAS2	RRAS2	23.399	40.2	7	15	5	1.034	1.026	0.957	0.994	1.01	0.974	1.035	1.01	1.026	0.987	0.66412	1.018	0.51478	1.031	0.072401
A0A287A340	Caspase recruitment domain family member 9 OS=Sus scrofa OX=9823 GN=CARD9	CARD9	64.821	14.6	7	10	1
A0A287A342	Galectin OS=Sus scrofa OX=9823 GN=LGALS9	LGALS9	33.867	17.9	5	10	5	0.814	0.843	0.848	1.006	1.023	1.046	1.093	1.17	1.173	1.228	0.00027691	1.372	0.00028064	1.117	0.0126793
A0A287A361	Coiled-coil domain containing 115 OS=Sus scrofa OX=9823 GN=CCDC115	CCDC115	19.825	5.6	1	1	1	0.974	1.09	0.929	1.051	1.026	1.088	0.953	0.993	0.911	1.057	0.3147	0.955	0.44928	0.903	0.027135
A0A287A365	G protein subunit beta 4 OS=Sus scrofa OX=9823 GN=GNB4	GNB4	37.567	26.5	8	30	4	0.844	0.943	0.9	1.075	0.995	1.025	1.076	1.053	1.106	1.152	0.022465	1.204	0.0060762	1.045	0.169684
A0A287A384	Ribosome assembly factor mrt4 OS=Sus scrofa OX=9823 GN=MRTO4	MRTO4	27.885	10.4	3	3	3	1.101	1.11	0.955	1.13	1.016	1.022	0.973	0.948	0.763	1.001	0.97778	0.848	0.138324	0.847	0.113804
A0A287A388	Protein HIRA OS=Sus scrofa OX=9823 GN=HIRA	HIRA	96.33	1.1	1	1	1	1.052	1.377	1.04	0.925	0.972	0.974	0.975	0.879	0.807	0.828	0.124476	0.767	0.071939	0.927	0.24116
A0A287A3A3	A-kinase anchoring protein 12 OS=Sus scrofa OX=9823 GN=AKAP12	AKAP12	179.36	30.3	42	71	0
A0A287A3B4	Mediator complex subunit 12 OS=Sus scrofa OX=9823 GN=MED12	MED12	242.43	1.5	3	4	3	0.95	1.071	0.896	1.13	0.997	1.004	1.024	0.818	1.117	1.073	0.33968	1.014	0.93916	0.945	0.56632
A0A287A3C9	Murine retrovirus integration site 1 homolog OS=Sus scrofa OX=9823 GN=MRVI1	MRVI1	86.427	7.6	6	6	6	1.081	0.967	1.002	1.015	0.992	0.967	0.996	1.04	0.903	0.975	0.53298	0.964	0.51722	0.988	0.77666
A0A287A3F1	Amino-terminal enhancer of split OS=Sus scrofa OX=9823 GN=AES	AES	21.97	4.6	1	1	1	1.182	0.917	0.987	1.017	1.035	0.998	1.013	0.881	0.991	0.988	0.9437	0.935	0.50624	0.946	0.26782
A0A287A3G7	Zinc finger with KRAB and SCAN domains 1 OS=Sus scrofa OX=9823 GN=ZKSCAN1	ZKSCAN1	63.233	3	1	1	1
A0A287A3H9	AT-hook containing transcription factor 1 OS=Sus scrofa OX=9823 GN=AHCTF1	AHCTF1	245.08	1.9	3	3	3	1.079	1.184	1.016	0.953	1.02	0.948	1.03	1.028	0.758	0.891	0.086016	0.859	0.22298	0.964	0.68242
A0A287A3J4	SEL1L ERAD E3 ligase adaptor subunit OS=Sus scrofa OX=9823 GN=SEL1L	SEL1L	88.683	7.3	6	10	6	0.926	0.952	1	1.011	0.997	1.024	1.045	1.035	1.083	1.054	0.091424	1.099	0.022918	1.043	0.055901
A0A287A3J9	Optineurin OS=Sus scrofa OX=9823 GN=OPTN	OPTN	61.403	20.7	12	13	12	0.922	1.026	1.079	0.953	0.912	0.935	1.076	0.964	0.978	0.925	0.189139	0.997	0.9734	1.078	0.114643
A0A287A3K0	Uncharacterized protein OS=Sus scrofa OX=9823 GN=AHSA2P	AHSA2P	38.001	2.7	1	1	1
A0A287A3K9	ADP-ribosylation factor-like protein 3 OS=Sus scrofa OX=9823 GN=ARL3	ARL3	19.276	6.4	1	3	1	1.042	1.012	0.972	0.964	1.079	0.895	1.015	0.968	1.064	0.971	0.6095	1.007	0.85578	1.037	0.55962
A0A287A3L4	PHD finger protein 3 OS=Sus scrofa OX=9823 GN=PHF3	PHF3	217.64	2.3	5	5	5	1.05	1.058	0.938	0.956	1.072	0.869	1.04	0.962	1.068	0.951	0.508	1.008	0.8752	1.06	0.42434
A0A287A3L5	Transcription factor 4 OS=Sus scrofa OX=9823 GN=TCF4	TCF4	56.238	3	1	1	1	0.941	0.902	0.854	0.97	0.932	1.144	0.997	1.232	1.058	1.129	0.159821	1.219	0.047817	1.079	0.44022
A0A287A3R1	Nuclear transcription factor Y subunit alpha OS=Sus scrofa OX=9823 GN=NFYA	NFYA	30.551	6.6	1	1	1
A0A287A3T0	Apolipoprotein R precursor OS=Sus scrofa OX=9823 GN=C4BPA	C4BPA	63.801	14.8	8	11	1
A0A287A3T1	Toll-interacting protein OS=Sus scrofa OX=9823 GN=TOLLIP	TOLLIP	29.842	26.5	6	9	6	1.048	1.02	0.974	0.96	1.073	1.03	0.931	1.017	1.036	1.007	0.87948	0.981	0.63966	0.974	0.60228
A0A287A3U6	Nitrilase 1 OS=Sus scrofa OX=9823 GN=NIT1	NIT1	31.649	12.2	3	4	3	1.043	0.984	1.005	0.98	1.031	1.005	1.003	0.998	0.94	0.995	0.82774	0.97	0.31876	0.975	0.37514
A0A287A3U9	Zw10 kinetochore protein OS=Sus scrofa OX=9823 GN=ZW10	ZW10	74.059	5.1	3	3	3	0.991	0.979	1.03	0.969	1.166	1.101	0.926	0.98	0.871	1.079	0.26804	0.926	0.104363	0.858	0.078825
A0A287A3W4	Proteasomal ATPase associated factor 1 OS=Sus scrofa OX=9823 GN=PAAF1	PAAF1	38.535	5.8	2	2	2
A0A287A3X6	Caspase recruitment domain family member 11 OS=Sus scrofa OX=9823 GN=CARD11	CARD11	133.16	15.4	16	17	16	0.949	0.979	0.98	1.004	1.094	1.021	1.001	0.919	1.043	1.073	0.070157	1.019	0.67544	0.95	0.31786
A0A287A3Z8	SR-related CTD associated factor 11 OS=Sus scrofa OX=9823 GN=SCAF11	SCAF11	144.39	7.1	7	8	7	0.87	0.92	1.062	1	0.877	0.913	1.161	1.049	1.146	0.978	0.79276	1.177	0.070262	1.203	0.021061
A0A287A414	Mast cell immunoglobulin like receptor 1 OS=Sus scrofa OX=9823 GN=MILR1	MILR1	34.488	4.3	1	1	1
A0A287A420	Putative deoxyribonuclease TATDN1 OS=Sus scrofa OX=9823 GN=TATDN1	TATDN1	31.929	12.1	3	3	3	1.047	1.092	1.076	1.067	1.039	0.911	0.939	0.929	0.91	0.938	0.2619	0.864	0.00068385	0.921	0.181775
A0A287A429	Transmembrane and coiled-coil domains 4 OS=Sus scrofa OX=9823 GN=TMCO4	TMCO4	66.246	2.9	1	1	1	1.739	1.003	1.148	0.886	1.021	0.927	0.914	0.487	0.91	0.729	0.164596	0.594	0.11652	0.815	0.3189
A0A287A440	Cytochrome c oxidase subunit 4I2 OS=Sus scrofa OX=9823 GN=COX4I2	COX4I2	20.226	6.4	1	1	1
A0A287A456	Protein arginine N-methyltransferase 5 OS=Sus scrofa OX=9823 GN=PRMT5	PRMT5	70.116	27	14	20	14	1.045	0.976	1.033	1.005	1.027	0.982	1.027	0.977	1.024	0.987	0.62964	0.991	0.76876	1.005	0.83716
A0A287A462	Guanine nucleotide-binding protein subunit gamma OS=Sus scrofa OX=9823 GN=GNG10	GNG10	7.3074	75	4	9	4	0.999	1.019	0.986	0.933	0.999	1.005	1.056	1.03	1.003	0.978	0.42076	1.028	0.191316	1.052	0.144896
A0A287A4A5	Uncharacterized protein OS=Sus scrofa OX=9823 GN=LOC100157002	LOC100157002	24.123	42.5	9	28	8	0.998	1.03	1	1.007	0.999	0.971	0.99	1.006	1.021	0.983	0.3214	0.996	0.80274	1.013	0.39878
A0A287A4D2	Secretory carrier-associated membrane protein OS=Sus scrofa OX=9823 GN=SCAMP2	SCAMP2	30.976	18.8	4	10	4	1.017	0.939	0.989	1.017	0.975	1	1.007	1.093	1.053	1.016	0.57196	1.071	0.109696	1.054	0.123
A0A287A4E1	Uncharacterized protein OS=Sus scrofa OX=9823 GN=LOC100154179	LOC100154179	49.389	5.9	2	3	2
A0A287A4E3	Uncharacterized protein OS=Sus scrofa OX=9823 GN=LOC100512341	LOC100512341	32.058	22	4	5	4	1.047	0.868	0.898	1.05	1.082	0.998	0.995	0.976	1.089	1.113	0.153384	1.088	0.26574	0.978	0.6031
A0A287A4F2	Splicing factor proline and glutamine rich OS=Sus scrofa OX=9823 GN=SFPQ	SFPQ	75.502	38.7	29	83	28	1.032	1.02	1.021	1.015	0.989	1.024	0.989	0.976	0.966	0.985	0.25164	0.954	0.0036769	0.968	0.059576
A0A287A4F4	Chromosome 5 open reading frame 51 OS=Sus scrofa OX=9823 GN=C5orf51	C5orf51	28.174	14.1	4	5	4
A0A287A4F7	Uncharacterized protein OS=Sus scrofa OX=9823	---	21.684	10	2	3	2	0.984	0.981	0.89	1.099	0.934	1.082	0.969	1.042	1.041	1.091	0.2359	1.069	0.174858	0.98	0.76396
A0A287A4G1	ZFP36 ring finger protein like 2 OS=Sus scrofa OX=9823 GN=ZFP36L2	ZFP36L2	51.136	6.7	3	5	3	0.913	1.07	1.084	0.955	1.085	0.922	1.062	0.99	0.921	0.966	0.66732	0.969	0.68706	1.004	0.94764
A0A287A4H1	Serum amyloid A like 1 OS=Sus scrofa OX=9823 GN=SAAL1	SAAL1	53.24	10.6	5	6	5	0.99	0.982	0.985	1.075	1.055	1.049	0.939	0.953	1.026	1.075	0.00073945	0.987	0.66076	0.918	0.038298
A0A287A4H2	Purine rich element binding protein B OS=Sus scrofa OX=9823 GN=PURB	PURB	32.908	32.5	8	13	8	1.067	1.025	1.008	1.03	0.952	1.008	0.965	0.993	1.02	0.965	0.27682	0.961	0.159638	0.996	0.90198
A0A287A4J1	Uncharacterized protein OS=Sus scrofa OX=9823 GN=ANP32E	ANP32E	24.739	6.5	2	4	2	1.076	0.921	1	1.016	0.916	1.005	1.012	0.964	1.111	0.98	0.74658	1.03	0.65148	1.051	0.4068
A0A287A4L4	Uncharacterized protein OS=Sus scrofa OX=9823 GN=UBA3	UBA3	50.059	17.5	8	9	8	1.027	0.981	0.988	1.015	1.026	0.997	0.991	1.019	1.032	1.014	0.44262	1.015	0.4571	1.001	0.93628
A0A287A4N4	Integrator complex subunit 11 OS=Sus scrofa OX=9823 GN=INTS11	INTS11	67.599	1.7	1	2	1	1.066	1.127	1.021	1.095	1.019	0.985	0.846	0.923	0.934	0.964	0.436	0.841	0.014916	0.872	0.036302
A0A287A4P3	DNA polymerase delta interacting protein 3 OS=Sus scrofa OX=9823 GN=POLDIP3	POLDIP3	42.521	20.3	6	8	6	0.94	1.021	0.937	1.017	1.002	1.077	1.01	1.013	1.05	1.068	0.136342	1.06	0.126142	0.993	0.79218
A0A287A4Q7	Actinin alpha 4 OS=Sus scrofa OX=9823 GN=ACTN4	ACTN4	104.9	62.9	59	299	42	1.081	1.075	1.049	0.996	0.99	0.976	0.946	0.943	0.925	0.924	0.0020205	0.878	0.00035965	0.95	0.0051589
A0A287A4R7	DnaJ heat shock protein family (Hsp40) member B2 OS=Sus scrofa OX=9823 GN=DNAJB2	DNAJB2	32.047	18	6	7	6	0.993	1.062	0.945	1.006	0.961	0.925	1.077	0.932	1.006	0.964	0.43468	1.005	0.93878	1.043	0.44896
A0A287A4T2	Electron transfer flavoprotein subunit alpha, mitochondrial OS=Sus scrofa OX=9823 GN=ETFA	ETFA	35.051	43.2	15	33	15	1.008	1.013	1.034	1.021	1.01	1.019	0.981	0.979	0.989	0.998	0.86052	0.965	0.0136756	0.967	0.0017819
A0A287A4T6	NGFI-A binding protein 2 OS=Sus scrofa OX=9823 GN=NAB2	NAB2	49.657	2.4	1	1	1
A0A287A4U1	Uncharacterized protein OS=Sus scrofa OX=9823 GN=LOC100518417	LOC100518417	81.476	1.2	1	1	1
A0A287A4W6	RAB21, member RAS oncogene family OS=Sus scrofa OX=9823 GN=RAB21	RAB21	24.132	34.7	7	13	7	1.125	1.063	1.005	0.999	0.918	0.911	1.045	0.887	0.951	0.886	0.051016	0.903	0.147201	1.019	0.76526
A0A287A4W7	Uncharacterized protein OS=Sus scrofa OX=9823 GN=TOMM5	TOMM5	6.0352	29.4	2	2	2	1.014	1.037	1.014	0.976	0.992	0.927	1.013	1.03	1.012	0.945	0.057584	0.997	0.74768	1.055	0.063037
A0A287A503	TNF receptor superfamily member 6b OS=Sus scrofa OX=9823 GN=TNFRSF6B	TNFRSF6B	32.655	5.7	1	1	1
A0A287A512	Uncharacterized protein OS=Sus scrofa OX=9823	---	34.499	4	1	1	1
A0A287A515	Sarcoglycan gamma OS=Sus scrofa OX=9823 GN=SGCG	SGCG	31.652	7.9	2	2	2
A0A287A527	Replication initiator 1 OS=Sus scrofa OX=9823 GN=REPIN1	REPIN1	69.975	1.4	1	1	1
A0A287A533	Zinc finger protein 512B OS=Sus scrofa OX=9823 GN=ZNF512B	ZNF512B	95.758	2.9	2	3	2	1.141	1.017	0.973	0.965	0.969	0.934	0.874	1.022	1.132	0.916	0.154778	0.967	0.70048	1.056	0.5869
A0A287A546	RAS p21 protein activator 3 OS=Sus scrofa OX=9823 GN=RASA3	RASA3	106.99	19.7	16	19	16	0.922	0.975	0.977	1.015	1.022	1.014	1.009	1.033	1.026	1.062	0.088181	1.068	0.031523	1.006	0.49806
A0A287A547	Exportin for tRNA OS=Sus scrofa OX=9823 GN=XPOT	XPOT	110.09	7	6	10	6	0.991	0.897	1.035	0.953	1.066	0.975	1	1.092	0.95	1.024	0.67478	1.041	0.533	1.016	0.78608
A0A287A579	A-kinase anchor protein 9 OS=Sus scrofa OX=9823 GN=AKAP9	AKAP9	445.58	1.7	7	8	7	0.963	1.008	1.073	0.982	1.054	0.988	1.005	0.935	0.998	0.993	0.88186	0.965	0.41906	0.972	0.42162
A0A287A5A3	Uncharacterized protein OS=Sus scrofa OX=9823 GN=LOC100516957	LOC100516957	107.94	11.9	10	25	10	0.881	0.982	1.071	0.995	1.07	0.987	1.034	1.039	1.053	1.04	0.53616	1.065	0.3618	1.024	0.40182
A0A287A5B5	Serine/arginine repetitive matrix protein 2 OS=Sus scrofa OX=9823 GN=SRRM2	SRRM2	296.11	18.2	39	50	39	0.987	1.052	1.022	0.994	1.007	1.019	1.013	0.991	0.982	0.987	0.54126	0.975	0.29952	0.989	0.38614
A0A287A5C1	Kelch like family member 22 OS=Sus scrofa OX=9823 GN=KLHL22	KLHL22	62.446	3.8	2	2	2	0.884	0.976	1.027	1.043	1.015	0.831	0.991	1.081	1.162	1.001	0.97864	1.12	0.149797	1.119	0.24574
A0A287A5C3	Vacuolar protein sorting-associated protein 26B OS=Sus scrofa OX=9823 GN=LOC110255463	LOC110255463	38.335	21.9	6	8	6	1.057	1.055	0.987	1.011	1.044	1.018	0.942	0.927	0.938	0.992	0.76042	0.906	0.0128994	0.913	0.00114114
A0A287A5D9	Ninjurin 1 OS=Sus scrofa OX=9823 GN=NINJ1	NINJ1	16.632	15.9	1	1	1
A0A287A5G7	RNA binding motif protein 6 OS=Sus scrofa OX=9823 GN=RBM6	RBM6	122.61	5	5	5	5	0.95	0.888	0.986	0.928	0.988	0.951	1.1	1.061	1.161	1.015	0.68218	1.176	0.0156429	1.159	0.0099777
A0A287A5J1	Transmembrane anterior posterior transformation 1 OS=Sus scrofa OX=9823 GN=TAPT1	TAPT1	58.058	5.7	2	2	2
A0A287A5J6	Docking protein 3 OS=Sus scrofa OX=9823 GN=DOK3	DOK3	47.813	39	15	28	15	0.99	0.926	0.96	1.028	1.029	0.988	1.056	1.058	1.071	1.059	0.07138	1.107	0.0066586	1.046	0.032958
A0A287A5J8	CCR4-NOT transcription complex subunit 1 OS=Sus scrofa OX=9823 GN=CNOT1	CNOT1	262	8.6	20	28	20	1.019	1.003	0.979	1.003	1.015	0.983	1.005	1.016	1.006	1	0.99758	1.009	0.51134	1.009	0.43222
A0A287A5K4	RNA polymerase II associated protein 2 OS=Sus scrofa OX=9823 GN=RPAP2	RPAP2	63.699	3.5	2	2	2	1.034	1.105	0.88	0.837	1.262	1.151	1.11	0.908	0.719	1.077	0.67788	0.907	0.48642	0.842	0.38426
A0A287A5K6	LIM and calponin homology domains 1 OS=Sus scrofa OX=9823 GN=LIMCH1	LIMCH1	101.6	1.1	1	1	1	1.001	1.097	1.132	1.084	0.989	0.902	0.956	1.056	0.797	0.921	0.26494	0.87	0.183496	0.944	0.56558
A0A287A5K9	Integrin subunit alpha 10 OS=Sus scrofa OX=9823 GN=ITGA10	ITGA10	148.14	1.5	2	2	2
A0A287A5L8	Phytanoyl-CoA hydroxylase-interacting protein-like OS=Sus scrofa OX=9823 GN=PHYHIPL	PHYHIPL	37.553	5.8	2	2	2	0.908	0.972	0.931	1.042	1.132	1.003	1.124	0.855	1.032	1.13	0.041042	1.071	0.493	0.948	0.54212
A0A287A5M5	Catechol-O-methyltransferase domain containing 1 OS=Sus scrofa OX=9823 GN=COMTD1	COMTD1	28.67	5.7	1	1	1	1.031	1.006	0.972	1.095	1.013	0.933	1.02	0.935	1.01	1.011	0.86792	0.985	0.66348	0.975	0.67948
A0A287A5P1	3-hydroxyanthranilate 3,4-dioxygenase OS=Sus scrofa OX=9823 GN=HAAO	HAAO	28.277	6	1	1	1
A0A287A5S7	Dimethylarginine dimethylaminohydrolase 2 OS=Sus scrofa OX=9823 GN=DDAH2	DDAH2	29.718	37.2	8	20	8	1.044	1.025	1.025	1.047	0.987	0.987	0.99	0.981	1.01	0.976	0.3048	0.963	0.024297	0.987	0.57714
A0A287A5T1	Abhydrolase domain containing 14B OS=Sus scrofa OX=9823 GN=ABHD14B	ABHD14B	22.531	20.1	4	6	4	1.051	0.968	0.939	1.037	1.034	1.054	0.983	0.934	0.916	1.056	0.176524	0.958	0.34484	0.907	0.0108014
A0A287A5T5	Protein prenyltransferase alpha subunit repeat containing 1 OS=Sus scrofa OX=9823 GN=PTAR1	PTAR1	46.218	2.5	1	1	1
A0A287A5U1	RB binding protein 6, ubiquitin ligase OS=Sus scrofa OX=9823 GN=RBBP6	RBBP6	196.82	6.2	10	10	10	0.868	1.051	1.063	1.041	0.9	0.932	0.994	0.904	1.111	0.963	0.68112	1.009	0.91836	1.047	0.57884
A0A287A5U4	Calmodulin regulated spectrin associated protein family member 2 OS=Sus scrofa OX=9823 GN=CAMSAP2	CAMSAP2	157.43	3.3	4	4	4	1.077	1.074	1.037	1.011	0.954	0.996	1.007	0.901	0.956	0.929	0.02522	0.898	0.034684	0.967	0.4043
A0A287A5U7	HSPA (Hsp70) binding protein 1 OS=Sus scrofa OX=9823 GN=HSPBP1	HSPBP1	34.655	27.5	7	8	7	1.026	1.046	0.884	0.962	1.045	0.963	1.053	1.037	0.953	1.005	0.91566	1.029	0.64278	1.025	0.59192
A0A287A5V5	THO complex 2 OS=Sus scrofa OX=9823 GN=THOC2	THOC2	179.3	6.9	11	13	11	1.225	1.025	1.149	0.884	0.856	1.05	0.881	0.953	1.003	0.821	0.072583	0.835	0.049361	1.017	0.80574
A0A287A5Y2	Endoplasmic reticulum metallopeptidase 1 OS=Sus scrofa OX=9823 GN=ERMP1	ERMP1	92.324	8.5	6	9	6	1.043	0.983	0.976	0.996	1.003	0.968	1.002	1.035	1.014	0.988	0.65538	1.016	0.5129	1.028	0.124398
A0A287A604	Galectin 3 binding protein OS=Sus scrofa OX=9823 GN=LGALS3BP	LGALS3BP	60.947	10	4	10	4	0.915	0.975	1.033	1.142	1.096	1.087	0.954	0.921	0.951	1.138	0.02732	0.967	0.42498	0.85	0.00101902
A0A287A608	AHNAK nucleoprotein OS=Sus scrofa OX=9823 GN=AHNAK	AHNAK	398.65	51.7	88	185	15	1.004	1.043	1.017	0.945	0.943	0.943	0.985	0.988	1.056	0.924	0.0195804	0.989	0.66328	1.07	0.098124
A0A287A634	TBC1 domain family member 20 OS=Sus scrofa OX=9823 GN=TBC1D20	TBC1D20	45.884	2.7	1	1	1	1.111	1.032	0.884	0.939	0.932	0.952	1.153	1.12	0.905	0.933	0.43594	1.05	0.66528	1.126	0.27874
A0A287A646	F-box and WD repeat domain containing 11 OS=Sus scrofa OX=9823 GN=FBXW11	FBXW11	50.974	2.3	1	1	1
A0A287A656	SRSF protein kinase 1 OS=Sus scrofa OX=9823 GN=SRPK1	SRPK1	62.001	14.4	7	7	5	1.195	1.058	1.078	0.903	1.085	0.895	0.944	0.926	0.933	0.866	0.115299	0.841	0.046522	0.972	0.73826
A0A287A671	Delta-like protein OS=Sus scrofa OX=9823 GN=JAG1	JAG1	127.54	1.6	2	2	2	1.056	1.029	1.018	1.066	0.947	0.931	0.948	0.994	1.031	0.949	0.2841	0.958	0.179396	1.01	0.83272
A0A287A6C1	Uncharacterized protein OS=Sus scrofa OX=9823 GN=METTL7A	METTL7A	23.726	22.9	4	7	2	1.111	1.138	0.824	1.027	1.081	0.959	0.83	1.203	0.863	0.998	0.95046	0.942	0.7076	0.944	0.5965
A0A287A6E6	G protein pathway suppressor 1 OS=Sus scrofa OX=9823 GN=GPS1	GPS1	53.5	13.4	6	9	6	0.959	0.878	1.014	0.971	0.997	1.086	0.947	1.05	1.044	1.071	0.267	1.067	0.29148	0.996	0.9335
A0A287A6F5	Zinc binding alcohol dehydrogenase domain containing 2 OS=Sus scrofa OX=9823 GN=ZADH2	ZADH2	40.464	14.6	5	5	5	0.942	0.956	1.058	1.012	1.116	0.97	1.11	0.906	0.932	1.048	0.44734	0.997	0.94406	0.952	0.53076
A0A287A6F8	Leucine rich repeats and calponin homology domain containing 1 OS=Sus scrofa OX=9823 GN=LRCH1	LRCH1	78.658	9.1	5	5	4	0.865	1.011	1.107	1.038	1.144	1.053	0.835	0.951	0.999	1.084	0.3364	0.934	0.50048	0.861	0.069159
A0A287A6G2	Glucocorticoid induced 1 OS=Sus scrofa OX=9823 GN=GLCCI1	GLCCI1	24.777	5.3	1	1	1
A0A287A6I5	COMM domain containing 8 OS=Sus scrofa OX=9823 GN=COMMD8	COMMD8	20.994	7.7	1	1	1
A0A287A6I9	HBS1 like translational GTPase OS=Sus scrofa OX=9823 GN=HBS1L	HBS1L	66.683	18.5	9	9	9	1.172	1.055	1.049	0.974	0.954	0.877	0.911	0.877	0.954	0.856	0.03256	0.837	0.0151606	0.978	0.6093
A0A287A6K2	Epiplakin 1 OS=Sus scrofa OX=9823 GN=EPPK1	EPPK1	484.16	7.3	8	11	6	0.972	0.888	0.987	0.967	0.952	0.935	1.093	1.092	1.13	1.002	0.92516	1.164	0.0117388	1.162	0.00054387
A0A287A6K7	Adipocyte plasma membrane associated protein OS=Sus scrofa OX=9823 GN=APMAP	APMAP	69.319	21.2	14	24	14	1.052	0.977	0.994	0.987	1.006	0.989	1.048	0.987	0.971	0.986	0.59922	0.994	0.8686	1.008	0.7697
A0A287A6L4	Replication factor C subunit 5 OS=Sus scrofa OX=9823 GN=RFC5	RFC5	38.587	2.6	1	1	1	0.877	0.902	0.996	1.088	0.965	1.037	1.076	1.059	1.013	1.114	0.106856	1.134	0.040422	1.019	0.64574
A0A287A6N0	Polypeptide N-acetylgalactosaminyltransferase OS=Sus scrofa OX=9823 GN=GALNT2	GALNT2	57.52	13	7	9	7	0.902	1.023	1.013	0.981	0.981	0.981	1.047	1.101	1.024	1.002	0.94216	1.08	0.164384	1.078	0.073862
A0A287A6Q3	Set1/Ash2 histone methyltransferase complex subunit ASH2 OS=Sus scrofa OX=9823 GN=ASH2L	ASH2L	68.741	11	5	5	5	1.175	1.04	0.989	0.933	1.013	1.061	1.007	0.859	0.942	0.939	0.3826	0.876	0.129019	0.934	0.3094
A0A287A6S7	Inositol polyphosphate-5-phosphatase B OS=Sus scrofa OX=9823 GN=INPP5B	INPP5B	93.344	15.8	10	15	1
A0A287A6T5	Tropomyosin alpha-1 chain OS=Sus scrofa OX=9823 GN=TPM1	TPM1	32.579	55.3	22	50	1	0.877	0.89	0.891	0.952	0.911	0.953	1.217	1.15	1.175	1.059	0.021496	1.333	7.8508e-05	1.258	0.00049791
A0A287A6U0	Neurogranin OS=Sus scrofa OX=9823 GN=NRGN	NRGN	8.3693	16.3	1	1	1	0.915	0.711	0.925	1.186	1.229	1.205	0.881	0.884	1.08	1.419	0.054061	1.115	0.36444	0.786	0.069121
A0A287A6U4	Solute carrier family 43 member 1 OS=Sus scrofa OX=9823 GN=SLC43A1	SLC43A1	56.957	1.4	1	1	1
A0A287A6V1	Prolyl 4-hydroxylase subunit alpha 2 OS=Sus scrofa OX=9823 GN=P4HA2	P4HA2	54.166	4.6	2	2	2	1.179	0.965	1.075	0.902	0.793	0.838	1.148	1.069	1.057	0.787	0.026	1.017	0.77254	1.293	0.0047769
A0A287A6V9	Carboxymethylenebutenolidase homolog OS=Sus scrofa OX=9823 GN=CMBL	CMBL	28.153	13.5	3	3	3	1.137	1.09	0.974	0.975	1.082	1.042	0.88	1.033	0.812	0.968	0.60284	0.851	0.124318	0.879	0.159896
A0A287A6X5	HtrA serine peptidase 2 OS=Sus scrofa OX=9823 GN=HTRA2	HTRA2	48.19	4.4	2	3	2	1.004	0.962	1.176	0.866	1.176	1.004	0.993	1.078	0.851	0.969	0.7606	0.93	0.4706	0.959	0.74896
A0A287A6X6	GTP-binding protein Rheb OS=Sus scrofa OX=9823 GN=RHEB	RHEB	17.792	25.6	4	7	4	1.042	0.955	0.961	0.98	0.999	1.003	1.031	1.118	1.015	1.008	0.77588	1.07	0.176936	1.061	0.130856
A0A287A6Y0	Sorting nexin family member 30 OS=Sus scrofa OX=9823 GN=SNX30	SNX30	45.186	4.8	2	3	2	1.015	1.054	1.036	1.07	0.949	0.96	0.995	1.003	0.933	0.959	0.34234	0.944	0.083857	0.984	0.74884
A0A287A6Y2	Component of oligomeric golgi complex 6 OS=Sus scrofa OX=9823 GN=COG6	COG6	65.165	6.5	4	4	4	0.814	0.876	0.963	1.022	0.887	0.958	1.18	1.081	1.228	1.081	0.28578	1.315	0.0110958	1.217	0.024139
A0A287A6Y9	Tubulin beta chain OS=Sus scrofa OX=9823 GN=LOC100624785	LOC100624785	49.906	40	14	187	0
A0A287A6Z8	LLGL1, scribble cell polarity complex component OS=Sus scrofa OX=9823 GN=LLGL1	LLGL1	111.92	11.3	9	13	9	0.955	1.046	0.985	1.026	1.032	1.034	0.945	0.968	0.983	1.035	0.3157	0.97	0.36024	0.937	0.0049787
A0A287A701	Serine/threonine-protein kinase TBK1 OS=Sus scrofa OX=9823 GN=TBK1	TBK1	69.909	6.8	3	3	3	1.02	1.026	1.084	0.884	0.988	0.956	0.957	0.999	1.098	0.904	0.055783	0.976	0.59612	1.08	0.2184
A0A287A710	Nuclear factor 1 OS=Sus scrofa OX=9823 GN=NFIC	NFIC	42.911	10.7	4	5	3	1.057	1.052	1.041	0.982	0.993	0.958	1.034	0.935	0.962	0.931	0.0034379	0.93	0.137701	0.999	0.96524
A0A287A725	Uncharacterized protein OS=Sus scrofa OX=9823	---	10.845	38.8	4	8	4	1.082	1.073	1.002	0.996	1.08	0.93	0.97	0.938	0.935	0.952	0.36788	0.901	0.0181407	0.946	0.29422
A0A287A765	Importin 9 OS=Sus scrofa OX=9823 GN=IPO9	IPO9	115.23	9.5	10	13	10	1.051	1.078	1.054	1.003	0.989	0.996	0.951	0.971	1.038	0.939	0.0021605	0.93	0.056664	0.991	0.74172
A0A287A766	Semaphorin 4B OS=Sus scrofa OX=9823 GN=SEMA4B	SEMA4B	91.868	5.2	5	7	5	0.92	0.942	0.967	0.99	0.991	1	1.056	1.057	1.091	1.054	0.023501	1.133	0.0022599	1.075	0.0029831
A0A287A772	GIT ArfGAP 2 OS=Sus scrofa OX=9823 GN=GIT2	GIT2	81.386	15.2	10	15	9	1.005	0.987	1.093	1.013	1.015	0.949	0.974	1.013	0.948	0.965	0.41228	0.951	0.25266	0.986	0.65562
A0A287A780	Transportin 2 OS=Sus scrofa OX=9823 GN=TNPO2	TNPO2	100.42	7.1	6	7	2	1.009	1.198	1.147	0.863	1.156	0.833	0.865	0.817	1.105	0.85	0.21504	0.831	0.145321	0.977	0.88876
A0A287A781	Centrosomal protein 85 OS=Sus scrofa OX=9823 GN=CEP85	CEP85	76.241	1	1	3	1
A0A287A784	Keratin, type II cytoskeletal 8 OS=Sus scrofa OX=9823 GN=KRT8	KRT8	54.426	42.5	24	41	11	0.946	0.931	1	0.962	0.914	0.947	1.136	1.147	1.123	0.981	0.51818	1.184	0.00167803	1.207	0.00032257
A0A287A787	GSK3-beta interaction protein OS=Sus scrofa OX=9823 GN=GSKIP	GSKIP	15.591	7.2	1	1	1
A0A287A792	Solute carrier family 7 member 6 opposite strand OS=Sus scrofa OX=9823 GN=SLC7A6OS	SLC7A6OS	35.136	3.2	1	1	1
A0A287A7A8	Bromodomain containing 1 OS=Sus scrofa OX=9823 GN=BRD1	BRD1	114.68	1	1	1	1
A0A287A7C7	Complement decay-accelerating factor precursor OS=Sus scrofa OX=9823 GN=CD55	CD55	33.311	15.2	5	6	5	1.055	0.969	0.943	0.991	0.97	1.007	1.019	1.044	1.035	1	0.97104	1.044	0.26882	1.044	0.029555
A0A287A7G5	Protein tyrosine phosphatase, receptor type E OS=Sus scrofa OX=9823 GN=PTPRE	PTPRE	69.57	5.3	3	5	3	1.033	0.815	0.926	1.058	1.157	1.061	0.995	1.009	0.971	1.181	0.0845	1.072	0.34354	0.908	0.038282
A0A287A7G8	Histone H2B OS=Sus scrofa OX=9823	---	16.719	51.7	10	84	8	1.089	1.035	0.985	1.029	1.063	1.014	0.911	0.997	0.917	0.999	0.99252	0.909	0.079777	0.91	0.041379
A0A287A7J3	Cytochrome P450 family 1 subfamily B member 1 OS=Sus scrofa OX=9823 GN=CYP1B1	CYP1B1	50.807	22.7	10	12	10	1.104	1.037	1.203	0.936	0.941	0.95	0.956	0.977	0.995	0.845	0.061617	0.876	0.042295	1.036	0.047156
A0A287A7K5	USP6 N-terminal like OS=Sus scrofa OX=9823 GN=USP6NL	USP6NL	75.607	5.6	3	5	3	1.196	1.172	0.885	1.279	0.92	0.813	0.875	0.969	0.924	0.926	0.63042	0.851	0.20592	0.919	0.6556
A0A287A7L4	Leucine rich repeat containing 25 OS=Sus scrofa OX=9823 GN=LRRC25	LRRC25	34.176	19.9	4	5	4	1.399	1.162	0.818	0.959	1.212	1.072	1.006	0.68	0.715	0.96	0.90532	0.711	0.170425	0.74	0.090599
A0A287A7N7	rRNA adenine N(6)-methyltransferase OS=Sus scrofa OX=9823 GN=DIMT1	DIMT1	35.367	9.3	2	2	2
A0A287A7Q5	Chloride intracellular channel protein OS=Sus scrofa OX=9823 GN=CLIC2	CLIC2	28.312	47	9	15	9	1.091	1.048	0.98	0.96	0.992	1.045	0.952	0.994	1.017	0.961	0.37748	0.95	0.2403	0.989	0.73986
A0A287A7R3	Vacuole membrane protein 1 OS=Sus scrofa OX=9823 GN=VMP1	VMP1	41.274	2.5	1	1	1
A0A287A7S9	Acyl-coenzyme A oxidase OS=Sus scrofa OX=9823 GN=ACOX1	ACOX1	62.709	4.1	3	3	3
A0A287A7U3	Mitogen-activated protein kinase OS=Sus scrofa OX=9823 GN=MAPK7	MAPK7	79.587	2.2	1	1	1	1.151	0.978	1.041	0.969	0.85	1.004	1.102	0.978	0.951	0.891	0.16934	0.956	0.53304	1.074	0.3512
A0A287A7U4	Kinesin-like protein OS=Sus scrofa OX=9823 GN=KIF3A	KIF3A	78.331	1.6	1	1	1
A0A287A7U5	WD repeat domain 18 OS=Sus scrofa OX=9823 GN=WDR18	WDR18	45.804	8.3	3	3	3	0.998	1	0.929	0.981	0.969	1.011	1.013	1.085	1.034	1.012	0.6837	1.07	0.098523	1.058	0.079822
A0A287A7V2	Acyl-CoA thioesterase 7 OS=Sus scrofa OX=9823 GN=ACOT7	ACOT7	38.651	22.5	7	9	7	1.02	0.927	1.024	0.942	0.977	0.959	1.104	1.044	1.078	0.969	0.41784	1.086	0.084116	1.121	0.0041214
A0A287A7V3	Beta-hexosaminidase OS=Sus scrofa OX=9823 GN=HEXA	HEXA	62.597	22.4	10	22	10	1.009	0.953	1.011	0.963	0.991	1.017	1.016	1.027	1.004	0.999	0.98354	1.025	0.28994	1.026	0.20982
A0A287A7W9	MICAL like 1 OS=Sus scrofa OX=9823 GN=MICALL1	MICALL1	91.807	4.8	4	5	4	1.057	0.887	1.048	1.038	0.968	0.896	1.099	1.039	0.988	0.97	0.70302	1.045	0.51666	1.077	0.22488
A0A287A7X7	Pyroglutamyl-peptidase I OS=Sus scrofa OX=9823 GN=PGPEP1	PGPEP1	26.905	9.4	2	2	2
A0A287A7Y4	CCR4-NOT transcription complex subunit 10 OS=Sus scrofa OX=9823 GN=CNOT10	CNOT10	67.729	8.6	4	5	4	0.584	0.794	1.159	1.094	0.995	0.951	1.025	1.105	1.285	1.198	0.3412	1.346	0.18738	1.123	0.22026
A0A287A7Z8	Polybromo 1 OS=Sus scrofa OX=9823 GN=PBRM1	PBRM1	182.06	6.6	10	10	10	1.025	1.084	1.041	1.004	0.949	0.969	0.918	0.979	1.047	0.928	0.032683	0.935	0.172424	1.008	0.88578
A0A287A808	Cytochrome c oxidase subunit OS=Sus scrofa OX=9823 GN=COX6B	COX6B	10.156	61.6	7	19	7	0.942	1.001	0.989	1.098	1.073	1.005	0.885	0.889	0.95	1.083	0.06978	0.929	0.066661	0.858	0.0119024
A0A287A820	Uncharacterized protein OS=Sus scrofa OX=9823	---	19.468	23.2	4	4	4	0.994	1.037	1.057	0.918	0.936	0.883	1.107	0.984	1.092	0.886	0.0084566	1.031	0.5186	1.163	0.021581
A0A287A829	Mannosidase alpha class 2C member 1 OS=Sus scrofa OX=9823 GN=MAN2C1	MAN2C1	111.18	5.1	4	5	4	1.167	1.026	1.113	0.812	1.102	0.918	0.983	0.946	0.948	0.857	0.169497	0.87	0.025416	1.016	0.81732
A0A287A830	Pentaxin OS=Sus scrofa OX=9823 GN=CRP	CRP	22.546	16	3	4	3	0.64	0.683	0.702	0.973	0.979	1.006	1.33	1.365	1.338	1.461	0.00020199	1.992	1.86761e-05	1.363	1.89167e-05
A0A287A836	Protein LBH OS=Sus scrofa OX=9823 GN=LBH	LBH	12.157	36.2	2	4	2	0.988	1.056	1.067	0.992	1.065	1.064	0.898	0.999	0.883	1.003	0.92804	0.894	0.067441	0.891	0.061383
A0A287A837	Leucine zipper and CTNNBIP1 domain containing OS=Sus scrofa OX=9823 GN=LZIC	LZIC	20.165	26.1	6	8	6	1.071	1.054	0.99	0.989	0.949	0.955	1.039	1.008	1.022	0.929	0.054001	0.985	0.60348	1.061	0.0190159
A0A287A853	G protein subunit alpha 13 OS=Sus scrofa OX=9823 GN=GNA13	GNA13	44.028	29.2	10	17	9	0.985	0.995	1.006	1.04	1.007	0.99	1.047	1.017	1.003	1.017	0.34524	1.027	0.130619	1.01	0.63408
A0A287A863	Peptidylprolyl isomerase G OS=Sus scrofa OX=9823 GN=PPIG	PPIG	87.524	8.1	5	6	5	1.09	1.272	1.155	0.825	1.049	0.923	0.911	0.969	0.811	0.795	0.048682	0.765	0.0176414	0.962	0.69572
A0A287A872	Gem nuclear organelle associated protein 5 OS=Sus scrofa OX=9823 GN=GEMIN5	GEMIN5	166.67	5.6	8	8	8	1.042	0.905	1.287	0.958	0.98	0.931	0.878	1.089	0.947	0.887	0.40088	0.901	0.46218	1.016	0.86474
A0A287A876	Histidyl-tRNA synthetase 2, mitochondrial OS=Sus scrofa OX=9823 GN=HARS2	HARS2	51.276	8.5	4	5	1
A0A287A888	Programmed cell death 6 OS=Sus scrofa OX=9823 GN=PDCD6	PDCD6	20.012	23.8	4	5	4	1.27	1.096	1.02	0.932	1.004	1.028	0.814	0.914	0.813	0.875	0.141439	0.75	0.0194843	0.857	0.033875
A0A287A893	Uncharacterized protein OS=Sus scrofa OX=9823 GN=ERI3	ERI3	18.185	18.8	3	4	3	1.058	1.003	0.956	1.08	1.039	1.011	0.966	0.94	0.966	1.037	0.3469	0.952	0.188982	0.918	0.0155573
A0A287A8B5	Transcription factor CP2 OS=Sus scrofa OX=9823 GN=TFCP2	TFCP2	50.186	9.8	3	5	3	1.06	1.033	0.819	0.98	1.035	1.066	0.984	1.005	1.043	1.058	0.50692	1.041	0.60742	0.984	0.62742
A0A287A8C7	Plectin OS=Sus scrofa OX=9823 GN=PLEC	PLEC	590.33	36.7	191	275	3	0.94	0.938	1.077	0.989	0.99	0.932	1.023	1.094	0.98	0.985	0.80324	1.048	0.43802	1.064	0.179541
A0A287A8D7	MHC class II histocompatibility antigen SLA-DRB1 precursor OS=Sus scrofa OX=9823 GN=SLA-DRB1	SLA-DRB1	27.264	17.3	5	9	5	1.002	0.93	0.941	1.012	1.038	1.044	1.025	1.046	1.05	1.077	0.04086	1.086	0.026685	1.009	0.51208
A0A287A8E1	AP-1 complex subunit mu-1 OS=Sus scrofa OX=9823 GN=AP1M1	AP1M1	45.718	24.4	9	10	9	0.962	1.018	1.023	0.993	0.965	1.018	0.985	0.976	1.053	0.991	0.74084	1.004	0.9164	1.013	0.68694
A0A287A8E4	Mediator of RNA polymerase II transcription subunit 15 OS=Sus scrofa OX=9823 GN=MED15	MED15	61.014	3.1	1	2	1	1.167	1.079	0.708	0.807		1.281		0.929		1.06	0.84872	0.943		0.89
A0A287A8F8	MICOS complex subunit OS=Sus scrofa OX=9823 GN=CHCHD6	CHCHD6	24.704	13.5	3	3	3
A0A287A8G0	DNA (cytosine-5)-methyltransferase OS=Sus scrofa OX=9823 GN=DNMT1	DNMT1	181.95	9.2	13	13	13	0.981	0.96	1.06	1.026	0.966	0.956	0.999	0.975	1.088	0.982	0.66508	1.02	0.67982	1.039	0.40246
A0A287A8G9	Hemochromatosis OS=Sus scrofa OX=9823 GN=HFE	HFE	36.45	7.5	2	2	2
A0A287A8H5	Uncharacterized protein OS=Sus scrofa OX=9823 GN=NAALADL2	NAALADL2	81.411	2.2	1	1	1
A0A287A8H7	Uncharacterized protein OS=Sus scrofa OX=9823 GN=NUDT4	NUDT4	20.329	5.6	1	1	1	1.101	1.004	0.979	0.906	1.044	1.034	0.892	0.943	1.115	0.968	0.59212	0.957	0.56412	0.989	0.87174
A0A287A8I5	Myosin IG OS=Sus scrofa OX=9823 GN=MYO1G	MYO1G	112.46	14.5	12	14	11	1.003	0.973	0.988	0.969	0.985	0.954	1.038	1.046	1.006	0.981	0.20828	1.043	0.048397	1.063	0.0158425
A0A287A8J5	Uncharacterized protein OS=Sus scrofa OX=9823 GN=LOC110260316	LOC110260316	36.627	8.2	2	2	2	0.98	1.022	1.042	0.899	0.927	1.112	1.028	0.949	1.05	0.965	0.5956	0.994	0.87036	1.03	0.67176
A0A287A8K2	Uncharacterized protein OS=Sus scrofa OX=9823 GN=SLFN11	SLFN11	102.54	4.7	4	4	4	1.409	1.519	1.342	0.968	0.857	0.937	0.696	0.618	0.665	0.647	0.0010441	0.463	0.000102047	0.717	0.0026803
A0A287A8L0	COMM domain containing 5 OS=Sus scrofa OX=9823 GN=COMMD5	COMMD5	24.698	10.3	2	4	2	0.854	0.995	1.115	0.978	1.104	1.015	0.848	1.072	1.025	1.045	0.59934	0.994	0.9605	0.951	0.53748
A0A287A8P0	OS9, endoplasmic reticulum lectin OS=Sus scrofa OX=9823 GN=OS9	OS9	72.786	9.6	6	9	6	0.899	1.007	0.959	0.93	1.029	1.086	1.108	0.94	1.175	1.063	0.34524	1.125	0.198975	1.058	0.53704
A0A287A8P5	Oxysterol-binding protein OS=Sus scrofa OX=9823 GN=OSBPL1A	OSBPL1A	101.15	4.2	4	4	4	1.105	1.02	1.039	0.872	0.956	0.896	0.991	1.098	1.046	0.861	0.0147235	0.991	0.81614	1.151	0.025195
A0A287A8P8	UDP-galactose-4-epimerase OS=Sus scrofa OX=9823 GN=GALE	GALE	34.169	11.6	2	2	2	0.987	0.892	1.106	1.02	1.172	0.877	0.914	0.998	1.045	1.028	0.82484	0.991	0.92774	0.964	0.74886
A0A287A8R9	N-acetyl-alpha-glucosaminidase OS=Sus scrofa OX=9823 GN=NAGLU	NAGLU	82.479	9.9	5	5	5	1.148	0.979	0.949	1.101	1.018	0.98	1.032	1.005	1.027	1.007	0.89266	0.996	0.99476	0.989	0.7857
A0A287A8T0	60S ribosomal protein L7 OS=Sus scrofa OX=9823 GN=RPL7	RPL7	29.41	46	15	61	15	1.017	1.024	0.973	1.032	1.008	1.021	0.962	1.02	0.963	1.016	0.41826	0.977	0.4063	0.962	0.130203
A0A287A8T1	CDK5 regulatory subunit associated protein 1 like 1 OS=Sus scrofa OX=9823 GN=CDKAL1	CDKAL1	59.405	6.5	3	3	3	0.915	1.056	1.066	0.941	1.075	0.971	1.005	1.059	0.923	0.984	0.81596	0.984	0.81614	1	0.99952
A0A287A8U7	Uncharacterized protein OS=Sus scrofa OX=9823	---	23.144	38.2	7	37	5	1.156	1.222	1.16	0.914	0.869	0.893	0.905	0.932	0.985	0.756	0.00027541	0.798	0.0017848	1.055	0.141159
A0A287A8V4	Protein LYRIC OS=Sus scrofa OX=9823 GN=MTDH	MTDH	60.393	33.9	15	24	15	0.93	0.965	0.985	1.011	1.037	0.988	1.017	1.025	1.038	1.054	0.073023	1.069	0.0194605	1.014	0.39252
A0A287A8V8	Uncharacterized protein OS=Sus scrofa OX=9823 GN=TBP	TBP	23.494	7.9	2	2	2	0.982	0.957	1.019	1.015	1.092	0.949	1.017	1.02	0.961	1.033	0.52026	1.014	0.64118	0.981	0.7108
A0A287A8W4	Filamin binding LIM protein 1 OS=Sus scrofa OX=9823 GN=FBLIM1	FBLIM1	39.014	23.4	7	7	7	1.247	1.127	0.995	0.801	0.706	0.999	1.053	1.004	1.099	0.744	0.066461	0.937	0.42942	1.259	0.083439
A0A287A8W9	Septin-2 OS=Sus scrofa OX=9823 GN=SEPT2	SEPT2	40.514	63.4	19	55	19	1.055	1.028	1.008	0.987	1.02	0.993	0.977	0.987	1.012	0.971	0.147357	0.963	0.087845	0.992	0.6098
A0A287A8Y0	Tumor suppressing subtransferable candidate 4 OS=Sus scrofa OX=9823 GN=TSSC4	TSSC4	27.144	11.9	3	4	3	0.896	0.894	1.142	0.998	0.836	0.868	1.083	0.982	1.145	0.922	0.46916	1.095	0.36232	1.188	0.068943
A0A287A8Z5	Muscular LMNA interacting protein OS=Sus scrofa OX=9823 GN=MLIP	MLIP	30.699	11.9	2	2	2	0.894	0.909	0.988	1.096	1.07	0.991	1.045	1	1.017	1.131	0.04668	1.097	0.049222	0.97	0.41708
A0A287A947	Chromosome 1 open reading frame 198 OS=Sus scrofa OX=9823 GN=C1orf198	C1orf198	35.8	12.3	2	2	2	1.372	0.996	1.023	0.519	0.937	1.058	0.966	1.09	1.078	0.741	0.2418	0.924	0.56078	1.247	0.30304
A0A287A949	OCIA domain containing 1 OS=Sus scrofa OX=9823 GN=OCIAD1	OCIAD1	21.682	19.2	4	4	4	1.107	1.029	1.053	0.852	1.094	1.069	0.937	0.974	0.901	0.945	0.49588	0.882	0.0156183	0.933	0.48292
A0A287A953	Ubl carboxyl-terminal hydrolase 18 OS=Sus scrofa OX=9823 GN=USP18	USP18	34.649	3.7	1	1	1	1.075	0.986	0.988	0.946	1.022	0.956	0.982	1.073	0.995	0.959	0.32764	1	0.99286	1.043	0.31632
A0A287A961	Nipped-B protein OS=Sus scrofa OX=9823 GN=NIPBL	NIPBL	295.18	3.8	8	8	8	0.958	1.062	1.035	0.893	0.97	1.067	0.985	1.152	0.999	0.959	0.50906	1.027	0.69754	1.07	0.39656
A0A287A964	HECT and RLD domain containing E3 ubiquitin protein ligase 4 OS=Sus scrofa OX=9823 GN=HERC4	HERC4	114.09	10.6	8	9	8	1.064	1.046	1.101	1.01	1.072	0.985	0.845	0.923	0.98	0.955	0.189004	0.856	0.026062	0.896	0.089781
A0A287A974	TBC1 domain containing kinase OS=Sus scrofa OX=9823 GN=TBCK	TBCK	83.256	4.6	3	3	3
A0A287A976	COP9 signalosome complex subunit 5 OS=Sus scrofa OX=9823 GN=COPS5	COPS5	38.603	25.6	7	11	7	0.978	1.015	1.03	1.029	0.958	0.984	0.955	0.983	1.014	0.983	0.53568	0.977	0.36202	0.994	0.82814
A0A287A991	Pleckstrin homology domain containing A2 OS=Sus scrofa OX=9823 GN=PLEKHA2	PLEKHA2	43.565	12.8	5	8	5	1.044	0.984	0.945	1.018	0.987	1.031	1.088	1.026	0.898	1.021	0.53226	1.013	0.87494	0.992	0.85998
A0A287A994	Trafficking protein particle complex subunit 13 OS=Sus scrofa OX=9823 GN=TRAPPC13	TRAPPC13	39.137	4.8	2	2	2	1.097	1.107	1.005	0.991	1.024	0.963	0.984	1.039	0.81	0.928	0.105656	0.883	0.188415	0.951	0.5164
A0A287A999	DENN domain containing 1B OS=Sus scrofa OX=9823 GN=DENND1B	DENND1B	76.643	3.6	2	2	1
A0A287A9A0	Oxysterol-binding protein OS=Sus scrofa OX=9823 GN=OSBPL9	OSBPL9	63.831	9.5	5	6	5	0.957	1.009	0.973	1.061	0.968	1.064	0.958	1.092	0.937	1.052	0.22106	1.016	0.7925	0.966	0.5594
A0A287A9A2	Peroxisomal biogenesis factor 1 OS=Sus scrofa OX=9823 GN=PEX1	PEX1	141.36	0.9	1	1	1
A0A287A9B5	Mitochondrial pyruvate carrier OS=Sus scrofa OX=9823 GN=MPC1	MPC1	12.486	8.3	1	1	1	0.994	1	0.942	1.058	1.009	0.97	1.019	1.005	1.019	1.034	0.34658	1.036	0.138198	1.002	0.92426
A0A287A9C0	Sorting nexin 4 OS=Sus scrofa OX=9823 GN=SNX4	SNX4	49.847	9.8	5	6	5	1.091	1.012	1.027	0.944	0.992	1.01	1.02	0.953	0.947	0.941	0.119516	0.933	0.103556	0.991	0.78668
A0A287A9D0	Protein tyrosine phosphatase, receptor type C OS=Sus scrofa OX=9823 GN=PTPRC	PTPRC	124.31	33.3	34	104	34	0.965	0.972	0.969	1.032	1.038	1.038	1.002	0.989	1.012	1.07	1.95777e-05	1.033	0.0093164	0.966	0.0076825
A0A287A9D3	Interferon induced protein 44 like OS=Sus scrofa OX=9823 GN=IFI44L	IFI44L	47.633	16.3	6	6	2	1.087	0.916	0.943	1.068	1.021	1.045	0.894	1.008	1.045	1.064	0.3016	1	0.98962	0.94	0.26384
A0A287A9E0	Serine-protein kinase ATM OS=Sus scrofa OX=9823 GN=ATM	ATM	339.55	2.5	6	6	6	1.021	1.033	1.046	1.084	0.961	1.029	0.933	0.963	0.945	0.992	0.80086	0.916	0.00164024	0.924	0.097503
A0A287A9E6	TBC1 domain family member 23 OS=Sus scrofa OX=9823 GN=TBC1D23	TBC1D23	76.538	2.6	2	3	2
A0A287A9F0	Mitogen-activated protein kinase kinase kinase kinase OS=Sus scrofa OX=9823 GN=MAP4K2	MAP4K2	87.005	7.2	5	6	4	1.129	1.092	1.078	0.99	0.834	0.994	1.02	1.01	0.874	0.854	0.053959	0.88	0.066356	1.031	0.7067
A0A287A9G0	LanC like 2 OS=Sus scrofa OX=9823 GN=LANCL2	LANCL2	51.303	25.4	9	12	9	0.92	1.02	0.979	1.005	1.032	0.963	1.047	1.024	0.982	1.028	0.48372	1.046	0.26862	1.018	0.5585
A0A287A9G3	G protein subunit alpha o1 OS=Sus scrofa OX=9823 GN=GNAO1	GNAO1	40.13	15.3	5	17	2	1.129	1.102	1.052	0.852	0.972	0.847	1.025	0.946	1.087	0.814	0.0136783	0.931	0.18618	1.145	0.087677
A0A287A9H4	Heterogeneous nuclear ribonucleoprotein F OS=Sus scrofa OX=9823 GN=HNRNPF	HNRNPF	42.478	36.9	11	43	9	1.048	1.034	1.029	1.012	0.999	0.999	0.976	1.02	0.986	0.968	0.0090609	0.959	0.041983	0.991	0.53464
A0A287A9H6	Uncharacterized protein OS=Sus scrofa OX=9823 GN=VAMP2	VAMP2	12.649	34.5	4	7	1	1.034	1.011	0.927	0.978	0.845	1.212	0.889	0.889	1.234	1.021	0.92502	1.013	0.98606	0.992	0.956
A0A287A9I6	SAMM50 sorting and assembly machinery component OS=Sus scrofa OX=9823 GN=SAMM50	SAMM50	51.871	14.5	6	8	6	1.027	0.984	1.042	0.962	1.041	1.045	0.971	0.922	0.981	0.998	0.9516	0.941	0.078738	0.943	0.152339
A0A287A9L5	VPS16, CORVET/HOPS core subunit OS=Sus scrofa OX=9823 GN=VPS16	VPS16	89.849	7.5	5	6	5	0.921	0.933	0.982	1.063	0.937	0.945	1.121	1.014	1.097	1.038	0.46534	1.14	0.022898	1.097	0.139057
A0A287A9P3	Myosin light chain kinase, smooth muscle OS=Sus scrofa OX=9823 GN=MYLK	MYLK	194.76	21.7	37	123	37	1.02	1.014	1.029	0.973	0.974	0.975	1.003	1.022	1.01	0.954	0.0082582	0.991	0.25596	1.039	0.020475
A0A287A9P4	Serine/threonine-protein phosphatase 2A 56 kDa regulatory subunit OS=Sus scrofa OX=9823 GN=PPP2R5C	PPP2R5C	52.065	12.2	5	9	2	1.15	1.079	1.059	0.93	1.088	0.913	1.03	0.897	0.866	0.891	0.126342	0.849	0.047536	0.953	0.56642
A0A287A9S2	G protein-coupled receptor kinase OS=Sus scrofa OX=9823 GN=GRK2	GRK2	78.682	6.7	5	5	2
A0A287A9S3	Tumor protein D52 OS=Sus scrofa OX=9823 GN=TPD52	TPD52	19.902	38	7	12	7	0.971	1.004	0.982	1.01	1.011	1.09	0.986	1.005	1	1.052	0.137337	1.011	0.36876	0.961	0.20896
A0A287A9T4	Heat shock protein HSP 90-beta OS=Sus scrofa OX=9823 GN=HSP90AB1	HSP90AB1	81.42	46.8	33	163	20	0.953	0.969	0.976	1.041	1.052	1.047	1.017	0.986	0.986	1.084	0.00047806	1.031	0.069084	0.952	0.0101007
A0A287A9T7	Tyrosine-protein kinase receptor UFO precursor OS=Sus scrofa OX=9823 GN=AXL	AXL	97.419	3.1	3	3	2	0.816	0.901	0.844	1.085	1.095	1.016	1.086	1.129	1.041	1.248	0.0040646	1.271	0.0029988	1.019	0.60562
A0A287A9T8	Uncharacterized protein OS=Sus scrofa OX=9823 GN=CETN2	CETN2	24.708	19.1	4	4	4	0.926	0.907	1.067	0.984	1.06	1.023	1.233	0.783	1.011	1.058	0.35284	1.044	0.84982	0.987	0.83442
A0A287A9U8	Nucleoporin 88 OS=Sus scrofa OX=9823 GN=NUP88	NUP88	83.317	14.1	9	14	9	0.951	1.018	1.066	1.045	1.003	0.956	0.888	1.011	1.003	0.99	0.82626	0.956	0.44336	0.966	0.50942
A0A287A9V3	WD repeat domain 81 OS=Sus scrofa OX=9823 GN=WDR81	WDR81	208.21	4	7	7	7	1.116	1.019	1.087	0.946	0.977	0.953	0.958	0.956	1.009	0.893	0.0170559	0.907	0.039722	1.016	0.4721
A0A287A9X1	Isocitrate dehydrogenase [NAD] subunit, mitochondrial OS=Sus scrofa OX=9823 GN=IDH3G	IDH3G	36.694	14.3	6	7	6	1.009	0.995	0.993	1.008	0.993	0.965	0.97	1.017	0.988	0.99	0.48598	0.993	0.63448	1.003	0.88078
A0A287A9Z2	L-2-hydroxyglutarate dehydrogenase OS=Sus scrofa OX=9823 GN=L2HGDH	L2HGDH	46.08	3.9	2	3	2	1.018	0.933	1.198	0.843	0.998	0.931	1.074	0.95	1.06	0.88	0.23066	0.979	0.84826	1.113	0.160604
A0A287AA07	Exocyst complex component 8 OS=Sus scrofa OX=9823 GN=EXOC8	EXOC8	81.939	21.3	16	20	16	1.074	1.011	1.024	0.96	0.992	0.977	0.998	0.948	0.925	0.942	0.045455	0.923	0.05112	0.98	0.44818
A0A287AA09	CCR4-NOT transcription complex subunit 3 OS=Sus scrofa OX=9823 GN=CNOT3	CNOT3	67.161	9.1	6	8	6	0.997	0.948	0.955	0.931	0.986	0.95	0.913	1.04	1.142	0.989	0.64408	1.067	0.41162	1.08	0.33958
A0A287AA21	Enoyl-CoA hydratase, mitochondrial OS=Sus scrofa OX=9823 GN=ECHS1	ECHS1	31.236	29.7	10	16	10	1.003	1.026	0.998	0.989	0.983	1.03	1	0.992	1.002	0.992	0.64484	0.989	0.2948	0.997	0.8774
A0A287AA45	Histamine N-methyltransferase OS=Sus scrofa OX=9823 GN=HNMT	HNMT	33.482	19.5	5	7	5	1.017	0.997	0.983	1.046	0.956	1.047	1.008	0.986	0.995	1.017	0.63246	0.997	0.8348	0.98	0.57066
A0A287AA47	Glutamate-cysteine ligase modifier subunit OS=Sus scrofa OX=9823 GN=GCLM	GCLM	30.49	21.5	5	6	5	0.943	0.946	0.897	0.976	1.042	0.984	1.076	1.064	1.111	1.078	0.049964	1.167	0.0020023	1.083	0.030301
A0A287AA48	ClpB homolog, mitochondrial AAA ATPase chaperonin OS=Sus scrofa OX=9823 GN=CLPB	CLPB	65.268	3.4	2	2	2	0.924	1.027	1.025	0.96	1.046	0.962	1.075	0.986	1	0.997	0.96172	1.029	0.55046	1.031	0.47122
A0A287AA53	RHO family interacting cell polarization regulator 1 OS=Sus scrofa OX=9823 GN=RIPOR1	RIPOR1	135.2	5.7	6	7	6
A0A287AA56	LMBR1 domain containing 1 OS=Sus scrofa OX=9823 GN=LMBRD1	LMBRD1	61.879	3.3	1	1	1	0.786	0.876	1.021	1.062	1.039	1.02	0.97	1.186	1.051	1.163	0.177721	1.195	0.132142	1.028	0.70902
A0A287AA72	Dedicator of cytokinesis 6 OS=Sus scrofa OX=9823 GN=DOCK6	DOCK6	229.32	6.1	10	13	9	1.008	0.869	0.999	1.033	1.024	0.96	1.035	1.007	0.941	1.049	0.40478	1.037	0.53288	0.989	0.76676
A0A287AA85	Uncharacterized protein OS=Sus scrofa OX=9823 GN=HCAR2	HCAR2	41.943	13.5	4	5	4	0.78	0.807	0.918	0.869	0.981	1.043	1.252	1.148	1.209	1.155	0.120676	1.441	0.0027385	1.247	0.0196043
A0A287AAD5	Alpha-1B-glycoprotein OS=Sus scrofa OX=9823 GN=A1BG	A1BG	53.266	18.6	9	15	9	1.146	1.2	1.227	0.923	0.922	0.89	0.93	0.909	0.838	0.765	0.00033816	0.749	0.00151719	0.979	0.54572
A0A287AAE6	Ubiquitin associated protein 2 OS=Sus scrofa OX=9823 GN=UBAP2	UBAP2	97.904	1.9	1	1	1
A0A287AAF5	OPA1, mitochondrial dynamin like GTPase OS=Sus scrofa OX=9823 GN=OPA1	OPA1	115.79	21.4	21	27	21	0.998	1.031	1.015	0.967	0.995	0.998	1.004	1.028	0.981	0.972	0.111619	0.99	0.56418	1.018	0.35338
A0A287AAG0	UDP-N-acetylglucosamine pyrophosphorylase 1 like 1 OS=Sus scrofa OX=9823 GN=UAP1L1	UAP1L1	55.944	16.7	7	11	7	1.036	1.01	0.982	0.947	1.047	0.972	1.034	1.019	0.983	0.98	0.5619	1.003	0.90802	1.024	0.51456
A0A287AAH7	DNA helicase B OS=Sus scrofa OX=9823 GN=HELB	HELB	122.32	1.8	2	2	2
A0A287AAI4	Heterogeneous nuclear ribonucleoprotein D OS=Sus scrofa OX=9823 GN=HNRNPD	HNRNPD	36.177	35.1	11	28	1
A0A287AAJ2	Protein tweety homolog OS=Sus scrofa OX=9823 GN=TTYH2	TTYH2	51.821	1.9	1	1	1
A0A287AAJ6	Misshapen like kinase 1 OS=Sus scrofa OX=9823 GN=MINK1	MINK1	145.77	3.7	5	5	4	0.706	0.886	0.748	0.799	1.292	0.959	1.275	1.303	1.038	1.303	0.184002	1.545	0.0119449	1.186	0.30582
A0A287AAM0	Dynein light chain roadblock OS=Sus scrofa OX=9823 GN=DYNLRB1	DYNLRB1	10.963	34.4	2	4	2	1.04	0.981	0.966	0.942	1	1.036	1	1.057	1.074	0.997	0.93132	1.048	0.20544	1.051	0.22534
A0A287AAM6	Vacuolar protein sorting 25 homolog OS=Sus scrofa OX=9823 GN=VPS25	VPS25	23.548	17.8	4	5	4	0.943	1.038	0.96	1.011	1.008	0.973	1.145	0.93	0.998	1.017	0.60472	1.045	0.57786	1.027	0.72958
A0A287AAN3	Rap guanine nucleotide exchange factor 2 OS=Sus scrofa OX=9823 GN=RAPGEF2	RAPGEF2	173.03	3.3	5	6	5	0.869	1	1.028	1.007	1.081	1	1.019	0.961	1.036	1.066	0.31696	1.041	0.49682	0.977	0.5248
A0A287AAP0	Uncharacterized protein OS=Sus scrofa OX=9823 GN=LOC100522130	LOC100522130	34.339	31.6	7	11	5	0.942	0.956	1.1	0.938	1.001	1.023	1.108	1.004	1.01	0.988	0.863	1.041	0.51484	1.054	0.27344
A0A287AAP2	Very-long-chain (3R)-3-hydroxyacyl-CoA dehydratase OS=Sus scrofa OX=9823 GN=HACD2	HACD2	28.418	7.5	2	3	2	1.153	1.185	1.227	0.95	0.887	0.876	0.925	0.917	0.893	0.761	0.00090463	0.767	0.00022137	1.008	0.76874
A0A287AAR0	GTPase, IMAP family member 7 OS=Sus scrofa OX=9823 GN=GIMAP7	GIMAP7	34.293	26.3	6	7	6	0.924	0.92	0.951	1.103	0.972	1.009	1.068	1.042	1.021	1.103	0.067143	1.12	0.0024238	1.015	0.70114
A0A287AAR4	Actin, cytoplasmic 1 OS=Sus scrofa OX=9823 GN=ACTB	ACTB	40.015	65.2	22	432	9	0.997	0.954	0.951	0.947	0.995	1	1.043	1.055	1.034	1.014	0.58736	1.079	0.0094154	1.065	0.026555
A0A287AAS9	Catenin beta-1 OS=Sus scrofa OX=9823 GN=CTNNB1	CTNNB1	80.08	27.2	16	36	14	0.942	0.984	0.953	0.986	0.964	0.974	1.067	1.034	1.011	1.016	0.34396	1.081	0.0187999	1.064	0.021457
A0A287AAT2	Ubiquitin-conjugating enzyme E2 D1 OS=Sus scrofa OX=9823 GN=UBE2D1	UBE2D1	12.421	10.1	1	2	1	1.008	0.983	1.077	0.936	1.11	0.873	1.007	1.009	1.007	0.951	0.51704	0.985	0.65786	1.036	0.6301
A0A287AAY2	Calcium signal-modulating cyclophilin ligand OS=Sus scrofa OX=9823 GN=CAMLG	CAMLG	33.078	9.1	1	1	1	1.058	0.897	0.932	1.136	1.079	0.937	0.947	0.853	1.175	1.092	0.31678	1.03	0.8363	0.944	0.59592
A0A287AAY5	Afadin, adherens junction formation factor OS=Sus scrofa OX=9823 GN=AFDN	AFDN	177.86	11.3	16	19	16	0.999	1.075	0.933	0.952	0.959	0.984	0.952	1.002	1.054	0.963	0.43636	1	0.98298	1.039	0.2933
A0A287AB06	CXXC repeat containing interactor of PDZ3 domain OS=Sus scrofa OX=9823 GN=CRIPT	CRIPT	11.216	7.9	1	2	1
A0A287AB16	Uncharacterized protein OS=Sus scrofa OX=9823 GN=EIF5	EIF5	47.639	32.1	12	22	12	0.98	1.069	1.03	0.994	1.033	0.966	0.984	1.02	0.988	0.972	0.42726	0.972	0.36568	1	0.99714
A0A287AB21	Uncharacterized protein OS=Sus scrofa OX=9823 GN=PPP4R1	PPP4R1	99.956	5.6	4	4	4	0.948	0.975	0.929	0.991	1.056	0.998	1.058	0.954	1.101	1.068	0.056198	1.092	0.128397	1.022	0.68384
A0A287AB27	Tripartite motif containing 36 OS=Sus scrofa OX=9823 GN=TRIM36	TRIM36	81.718	1.7	1	1	1
A0A287AB36	Cornichon family AMPA receptor auxiliary protein 4 OS=Sus scrofa OX=9823 GN=CNIH4	CNIH4	16.063	14.4	1	2	1	1.182	0.916	1.027	1.225	0.917	0.937	0.814	1.001	1.016	0.985	0.88504	0.906	0.39262	0.919	0.53292
A0A287AB47	Histone deacetylase OS=Sus scrofa OX=9823 GN=HDAC6	HDAC6	117.07	2	2	2	2	1.061	1.023	0.887	0.947	0.919	0.974	1.1	1.036	1.076	0.956	0.49914	1.081	0.23272	1.131	0.0071027
A0A287AB56	RNA binding motif protein 22 OS=Sus scrofa OX=9823 GN=RBM22	RBM22	44.726	18.7	7	8	7	1.019	1.042	0.982	0.998	1.006	1.06	0.976	1.032	0.917	1.007	0.80334	0.961	0.35036	0.955	0.29262
A0A287AB58	ISG15 ubiquitin-like modifier OS=Sus scrofa OX=9823 GN=ISG15	ISG15	18.565	20.4	5	7	5	1.049	0.923	1.097	1.195	1.233	1.186	0.793	0.792	0.673	1.178	0.035338	0.736	0.0150032	0.625	0.00105919
A0A287ABA7	SAP30 like OS=Sus scrofa OX=9823 GN=SAP30L	SAP30L	20.805	8.8	2	2	2
A0A287ABA8	ArfGAP with FG repeats 2 OS=Sus scrofa OX=9823 GN=AGFG2	AGFG2	40.805	3.7	1	2	1	0.939	1.003	1.039	0.961	1.14	1.191	0.908	0.786	1.032	1.104	0.25292	0.914	0.32288	0.828	0.135961
A0A287ABB5	Sodium/glucose cotransporter 5 OS=Sus scrofa OX=9823 GN=PRPSAP2	PRPSAP2	40.728	33.9	14	22	12	1.019	0.99	0.964	1.006	1.016	1.002	1.061	1.026	1.026	1.017	0.356	1.047	0.0775	1.029	0.072385
A0A287ABC7	CUGBP Elav-like family member 1 OS=Sus scrofa OX=9823 GN=CELF1	CELF1	52.066	9.7	4	5	4	0.917	0.943	0.944	1.099	1.008	1.032	0.984	0.975	1.099	1.119	0.0150555	1.091	0.097657	0.974	0.5916
A0A287ABC9	Protein tyrosine kinase 2 OS=Sus scrofa OX=9823 GN=PTK2	PTK2	105.87	9.2	8	11	8	0.94	1.01	1.025	0.95	1.004	0.984	1.007	0.997	1.028	0.988	0.719	1.019	0.52544	1.032	0.162075
A0A287ABD1	Abhydrolase domain containing 10 OS=Sus scrofa OX=9823 GN=ABHD10	ABHD10	29.088	17.7	4	5	4	1.17	1.156	0.956	0.975	1.056	1.021	0.939	1.004	0.747	0.93	0.37628	0.82	0.141761	0.881	0.22216
A0A287ABD8	Lysosomal acid lipase/cholesteryl ester hydrolase precursor OS=Sus scrofa OX=9823 GN=LIPA	LIPA	40.361	9	4	9	4	0.965	1.035	0.93	1.006	0.978	0.966	1.04	1.045	1.056	1.007	0.83106	1.072	0.156062	1.065	0.0080393
A0A287ABF0	Polycystin-2 OS=Sus scrofa OX=9823 GN=PKD2	PKD2	97.778	1.3	1	1	1	1.111	1.127	1.229	0.876	1.145	0.699	0.928	1.028	0.865	0.785	0.147301	0.814	0.024721	1.037	0.73754
A0A287ABG2	Proliferating cell nuclear antigen OS=Sus scrofa OX=9823 GN=PCNA	PCNA	28.779	34.1	8	21	5	1.049	0.983	1.017	1.065	1.035	0.992	0.97	0.964	0.963	1.014	0.6436	0.95	0.115076	0.937	0.089244
A0A287ABG3	3-keto-steroid reductase OS=Sus scrofa OX=9823 GN=HSD17B7	HSD17B7	33.947	6.9	2	2	2	0.791	1.003	1.014	0.969	0.942	0.97	1.185	1.122	1.006	1.026	0.73314	1.18	0.146577	1.15	0.048739
A0A287ABH4	Cyclin dependent kinase 14 OS=Sus scrofa OX=9823 GN=CDK14	CDK14	52.997	7.2	3	3	2	0.985	1.029	0.952	0.978	1.046	0.95	1.048	0.937	1.084	1.003	0.95082	1.035	0.54432	1.032	0.59398
A0A287ABK2	Uncharacterized protein OS=Sus scrofa OX=9823 GN=PAPOLA	PAPOLA	77.623	15.3	9	11	9	0.98	0.999	0.998	1.05	1.001	1.017	0.997	0.895	0.991	1.031	0.123277	0.968	0.40266	0.94	0.169178
A0A287ABK7	Uncharacterized protein OS=Sus scrofa OX=9823 GN=ABCC1	ABCC1	164.73	7.6	10	11	9	0.894	0.925	0.973	0.941	1.02	0.975	1.111	1.022	1.113	1.052	0.21164	1.163	0.0157794	1.106	0.051919
A0A287ABL0	Tetratricopeptide repeat, ankyrin repeat and coiled-coil containing 1 OS=Sus scrofa OX=9823 GN=TANC1	TANC1	187.89	1.2	2	2	2
A0A287ABL2	Phosphatidate phosphatase LPIN2 OS=Sus scrofa OX=9823 GN=LPIN2	LPIN2	98.94	4	3	3	3
A0A287ABM2	cAMP-dependent protein kinase catalytic subunit alpha OS=Sus scrofa OX=9823 GN=PRKACA	PRKACA	35.968	19.4	8	20	3	0.991	0.952	1.032	0.958	1.003	0.955	0.998	0.996	1.057	0.98	0.52212	1.026	0.45026	1.046	0.146842
A0A287ABR0	Inositol polyphosphate-5-phosphatase D OS=Sus scrofa OX=9823 GN=INPP5D	INPP5D	133.66	34.2	35	47	35	0.996	1.037	1.068	1.036	0.999	0.988	0.979	0.972	0.964	0.975	0.36564	0.94	0.041261	0.964	0.073418
A0A287ABT2	Interferon-induced, double-stranded RNA-activated protein kinase OS=Sus scrofa OX=9823 GN=EIF2AK2	EIF2AK2	60.761	21.6	12	24	12	0.965	0.961	1.017	1.041	1.013	1.039	0.987	1.028	0.988	1.051	0.068977	1.02	0.41952	0.971	0.138104
A0A287ABU3	Biogenesis of lysosome-related organelles complex 1 subunit 5 OS=Sus scrofa OX=9823 GN=BLOC1S5	BLOC1S5	21.68	9.5	2	2	2	1.117	1	0.94	0.976	1.074	0.907	1.096	0.951	0.956	0.967	0.66228	0.982	0.81174	1.016	0.82798
A0A287ABU5	Insulin like growth factor 2 mRNA binding protein 3 OS=Sus scrofa OX=9823 GN=IGF2BP3	IGF2BP3	56.026	14	5	9	4	0.989	1.09	0.942	1.036	1.086	1.116	0.774	1.008	0.977	1.072	0.21516	0.913	0.36532	0.852	0.125556
A0A287ABV8	Rac/Cdc42 guanine nucleotide exchange factor 6 OS=Sus scrofa OX=9823 GN=ARHGEF6	ARHGEF6	82.709	24.7	17	22	14	0.966	0.977	0.99	0.993	0.986	1.036	1.065	1.012	0.964	1.028	0.182403	1.037	0.29834	1.009	0.81852
A0A287AC42	VAMP associated protein A OS=Sus scrofa OX=9823 GN=VAPA	VAPA	27.718	39	10	13	9	0.974	0.98	1.05	1.014	1.084	1.09	1.005	0.921	0.978	1.061	0.150003	0.967	0.39066	0.911	0.054522
A0A287AC49	Dedicator of cytokinesis 7 OS=Sus scrofa OX=9823 GN=DOCK7	DOCK7	260.1	1.4	3	3	2
A0A287AC60	Amyloid beta precursor protein binding family B member 2 OS=Sus scrofa OX=9823 GN=APBB2	APBB2	86.63	3.9	3	3	2
A0A287AC69	Proliferation and apoptosis adaptor protein 15 OS=Sus scrofa OX=9823 GN=PEA15	PEA15	15.04	30	3	5	3	1.184	1.009	1.061	1.017	1.071	0.96	0.85	1.001	0.874	0.937	0.32204	0.837	0.061924	0.894	0.129221
A0A287AC84	Senataxin OS=Sus scrofa OX=9823 GN=SETX	SETX	289.88	3.6	9	10	9	0.833	0.923	1.14	1.026	1.028	1.07	0.978	1.047	0.971	1.079	0.4621	1.035	0.68242	0.959	0.20124
A0A287ACB6	ER membrane protein complex subunit 1 OS=Sus scrofa OX=9823 GN=EMC1	EMC1	99.663	6.5	5	6	1
A0A287ACE3	SH3 domain-binding glutamic acid-rich-like protein OS=Sus scrofa OX=9823 GN=SH3BGRL2	SH3BGRL2	12.272	38.3	3	4	3	0.973	0.954	0.956	0.963	0.943	0.971	1.037	1.144	1.08	0.998	0.8529	1.131	0.0137211	1.133	0.0139037
A0A287ACK3	DAB2, clathrin adaptor protein OS=Sus scrofa OX=9823 GN=DAB2	DAB2	56.702	4.2	2	2	2
A0A287ACK5	RAB GTPase activating protein 1 like OS=Sus scrofa OX=9823 GN=RABGAP1L	RABGAP1L	102.14	8.2	6	7	5	1.035	1.039	1.043	1.007	1.068	0.994	0.889	0.939	0.954	0.985	0.54584	0.893	0.033663	0.906	0.033124
A0A287ACN2	Adipogenesis regulatory factor OS=Sus scrofa OX=9823 GN=ADIRF	ADIRF	7.7876	38.7	3	9	3	1.009	1.054	1.081	0.898	0.933	0.858	1.081	1.108	1.016	0.855	0.0076578	1.019	0.59328	1.192	0.0077037
A0A287ACN6	tRNA(His) guanylyltransferase OS=Sus scrofa OX=9823 GN=THG1L	THG1L	31.604	10.2	2	3	2	0.946	0.842	0.898	1.013	0.954	1.13	0.961	1.12	1.161	1.153	0.078202	1.207	0.050124	1.047	0.58744
A0A287ACN9	Fibrillarin OS=Sus scrofa OX=9823 GN=FBL	FBL	33.008	38	11	29	10	0.999	1.019	1.062	1.064	1.031	1.016	0.921	0.957	0.925	1.01	0.67626	0.91	0.0123358	0.901	0.0046375
A0A287ACP4	ERGIC and golgi 3 OS=Sus scrofa OX=9823 GN=ERGIC3	ERGIC3	43.289	6	3	3	3
A0A287ACP6	Uncharacterized protein OS=Sus scrofa OX=9823	---	61.859	25.6	14	22	14	1.057	1.021	1.058	1.14	1.072	0.975	0.86	0.888	0.894	1.016	0.77722	0.842	0.00051633	0.829	0.0168442
A0A287ACP9	Enoyl-CoA hydratase and 3-hydroxyacyl CoA dehydrogenase OS=Sus scrofa OX=9823 GN=EHHADH	EHHADH	79.678	3.3	3	4	3	1.033	1.113	1.09	0.966	0.982	0.981	0.75	1.332	0.785	0.905	0.0122213	0.886	0.48858	0.979	0.7863
A0A287ACR8	N-alpha-acetyltransferase 50 OS=Sus scrofa OX=9823 GN=NAA50	NAA50	19.311	44.6	7	11	7	1.086	1.003	1.039	0.941	0.985	0.998	1.007	0.942	1.067	0.935	0.082	0.964	0.4327	1.031	0.49666
A0A287ACS9	Guanine nucleotide-binding protein subunit gamma OS=Sus scrofa OX=9823	---	6.3492	15.3	1	3	1
A0A287ACV7	Redox-regulatory protein FAM213A isoform 2 OS=Sus scrofa OX=9823 GN=FAM213A	FAM213A	24.361	39.9	10	19	10	1.01	1.001	1.04	1.023	0.965	0.972	1.034	1.02	1.076	0.97	0.23266	1.026	0.26732	1.057	0.083524
A0A287ACX4	Peptidylprolyl isomerase OS=Sus scrofa OX=9823 GN=FKBP2	FKBP2	15.374	25	5	8	5	1.009	0.931	0.974	0.978	0.974	1.04	1.031	1.011	1.019	1.027	0.44738	1.05	0.106682	1.023	0.34988
A0A287ACX8	Leucine zipper putative tumor suppressor 2 OS=Sus scrofa OX=9823 GN=LZTS2	LZTS2	72.405	1.9	1	1	1
A0A287ACX9	Pyruvate kinase OS=Sus scrofa OX=9823 GN=PKM	PKM	58.032	55.7	32	140	3	1.142	1.028	1.127	0.939	0.998	0.968	0.987	0.882	0.941	0.881	0.028343	0.852	0.026258	0.967	0.41058
A0A287ACY1	Ran guanine nucleotide release factor isoform 2 OS=Sus scrofa OX=9823 GN=RANGRF	RANGRF	16.289	8.2	1	1	1	1.017	1.02	1.036	1.077	1	1.071	0.982	0.989	0.825	1.024	0.39084	0.91	0.24208	0.888	0.130158
A0A287ACY5	Synaptogyrin OS=Sus scrofa OX=9823 GN=SYNGR2	SYNGR2	24.612	13.8	3	3	3	0.983	0.968	1.03	0.997	0.925	0.999	1.014	1.044	1.057	0.98	0.54802	1.045	0.119442	1.066	0.082877
A0A287ACY7	Proteasome 26S subunit, non-ATPase 10 OS=Sus scrofa OX=9823 GN=PSMD10	PSMD10	20.907	30.1	4	8	4	1.197	1.187	1.293	0.895	0.832	0.87	0.868	1.073	0.806	0.706	0.00054439	0.747	0.029478	1.058	0.60784
A0A287ACY9	Uncharacterized protein OS=Sus scrofa OX=9823 GN=POM121C	POM121C	94.771	4.1	3	4	3	1.062	1.007	1.007	1.004	0.98	0.919	0.993	1.025	1.022	0.944	0.140837	0.988	0.60146	1.047	0.173858
A0A287AD21	Small ubiquitin-related modifier OS=Sus scrofa OX=9823 GN=SUMO3	SUMO3	11.808	20.2	2	6	1	0.944	1.059	1.026	0.959	1.05	0.936	0.973	0.991	1.069	0.972	0.59568	1.001	0.97238	1.03	0.54608
A0A287AD32	YTH N6-methyladenosine RNA binding protein 2 OS=Sus scrofa OX=9823 GN=YTHDF2	YTHDF2	56.941	11.3	6	9	4	1.13	1.042	1.197	0.928	0.929	1.065	0.941	0.901	0.882	0.867	0.078863	0.809	0.008996	0.932	0.23938
A0A287AD42	Methionine aminopeptidase 2 OS=Sus scrofa OX=9823 GN=METAP2	METAP2	50.568	22.1	7	10	7	1.04	1.062	1.044	0.945	0.945	0.985	1.011	0.985	0.979	0.914	0.00408	0.946	0.0089621	1.035	0.113559
A0A287AD58	RING1 and YY1 binding protein OS=Sus scrofa OX=9823 GN=RYBP	RYBP	21.313	8.7	2	2	2	0.843	0.878	1.013	1.01	0.998	1.093	1.035	1.09	1.051	1.134	0.109721	1.162	0.057357	1.024	0.49188
A0A287AD92	GrpE protein homolog OS=Sus scrofa OX=9823 GN=GRPEL1	GRPEL1	23.812	36.6	7	8	7	1.166	1.064	0.914	0.885	0.955	1.011	1.042	0.975	0.999	0.907	0.30794	0.959	0.64204	1.058	0.25464
A0A287AD98	Ephrin B1 OS=Sus scrofa OX=9823 GN=EFNB1	EFNB1	37.704	9.3	3	3	3	0.862	0.999	1.025	1.029	1.15	1.033	0.936	0.852	1.111	1.113	0.170817	1.005	0.99006	0.903	0.27938
A0A287AD99	Mitochondrial ribosomal protein S22 OS=Sus scrofa OX=9823 GN=MRPS22	MRPS22	39.946	4.8	2	2	2
A0A287ADB5	CutA divalent cation tolerance homolog OS=Sus scrofa OX=9823 GN=CUTA	CUTA	18.922	15.8	2	3	2	0.863	0.913	0.89	1.161	1.115	1.099	1.075	0.934	0.961	1.266	0.00052061	1.114	0.081324	0.88	0.047983
A0A287ADC9	Protein kinase C OS=Sus scrofa OX=9823 GN=PRKCE	PRKCE	66.572	1.4	1	2	1	1.095	1.029	1.03	0.953	0.968	0.944	0.994	1.001	1.006	0.908	0.0118193	0.951	0.077279	1.047	0.0046003
A0A287ADE6	Ribosomal protein S15a OS=Sus scrofa OX=9823 GN=RPS15A	RPS15A	14.839	20	3	7	2	0.963	0.979	0.989	1.024	0.972	1.095	1.058	0.947	1.086	1.055	0.2151	1.055	0.29442	1	0.99242
A0A287ADG1	Drebrin like OS=Sus scrofa OX=9823 GN=DBNL	DBNL	43.392	51.2	17	57	17	1.009	1.003	0.999	0.991	1.006	1.005	0.994	1.021	0.965	0.997	0.62248	0.99	0.5564	0.993	0.67804
A0A287ADH6	Sorbin and SH3 domain-containing protein 2 OS=Sus scrofa OX=9823 GN=SORBS2	SORBS2	77.988	19.9	13	16	9	1.043	1.003	1.002	0.971	1.007	0.996	1.04	1	0.995	0.976	0.22374	0.996	0.83422	1.021	0.31594
A0A287ADH9	Chloride intracellular channel protein OS=Sus scrofa OX=9823 GN=CLIC4	CLIC4	28.727	37.5	9	18	9	1.001	0.995	1.03	0.943	0.962	0.965	1.061	0.987	0.992	0.948	0.0147998	1.005	0.87826	1.059	0.079517
A0A287ADK3	Aldehyde dehydrogenase 7 family member A1 OS=Sus scrofa OX=9823 GN=ALDH7A1	ALDH7A1	55.456	31.2	15	29	15	1.024	1.036	1.041	0.99	0.98	1.018	0.985	0.99	0.949	0.964	0.039658	0.943	0.0142766	0.979	0.28338
A0A287ADK7	Mitochondrial fission 1 protein OS=Sus scrofa OX=9823 GN=FIS1	FIS1	16.838	15.8	2	6	2	1.108	1.043	0.761	1.14	1.011	0.927	1.089	1.006	0.944	1.057	0.6464	1.044	0.68456	0.987	0.88876
A0A287ADL8	26S proteasome non-ATPase regulatory subunit 4 OS=Sus scrofa OX=9823 GN=PSMD4	PSMD4	38.097	24.6	7	14	1	1.053	1.017	0.952	0.94	0.978	1.118	1.034	0.928	0.996	1.005	0.96634	0.979	0.64548	0.974	0.71272
A0A287ADP5	Protein lin-7 homolog OS=Sus scrofa OX=9823 GN=LIN7A	LIN7A	26.002	15.9	4	4	2
A0A287ADR4	RNA polymerase II subunit D OS=Sus scrofa OX=9823 GN=POLR2D	POLR2D	16.311	36.6	4	5	4	1.078	1.01	0.937	1.041	1.035	1.025	0.965	1.019	0.913	1.025	0.58314	0.958	0.45408	0.934	0.163916
A0A287ADS5	Poly [ADP-ribose] polymerase OS=Sus scrofa OX=9823 GN=PARP14	PARP14	198.8	11.4	18	23	18	0.931	1.027	1.021	0.96	1.026	0.96	1.043	1.034	1.04	0.989	0.79732	1.046	0.28378	1.058	0.125402
A0A287ADU7	Vir like m6A methyltransferase associated OS=Sus scrofa OX=9823 GN=VIRMA	VIRMA	196.34	1.4	2	2	2
A0A287ADW0	Family with sequence similarity 3 member C OS=Sus scrofa OX=9823 GN=FAM3C	FAM3C	21.535	11.7	2	3	2	0.857	1.018	1.013	0.916	1.016	0.877	1.114	1.165	1.033	0.973	0.72938	1.147	0.105279	1.179	0.041797
A0A287ADW5	Dishevelled associated activator of morphogenesis 2 OS=Sus scrofa OX=9823 GN=DAAM2	DAAM2	108.63	6.8	6	6	6	1.145	1.038	1.007	1.017	0.906	1.067	1.045	0.914	0.883	0.937	0.35076	0.891	0.144043	0.951	0.50962
A0A287ADW7	Tyrosine-protein phosphatase OS=Sus scrofa OX=9823 GN=PTPN22	PTPN22	90.187	4	3	3	3
A0A287ADX5	Mitochondrial import inner membrane translocase subunit TIM44 OS=Sus scrofa OX=9823 GN=TIMM44	TIMM44	51.675	22.2	9	10	9	1.059	1.106	1.076	0.467	1.084	1.055	1.156	0.996	1.003	0.804	0.40952	0.973	0.59266	1.211	0.41132
A0A287ADX7	GRIP1 associated protein 1 OS=Sus scrofa OX=9823 GN=GRIPAP1	GRIPAP1	93.91	26.8	16	19	16	1.044	0.931	0.943	0.987	1.034	1.002	1.091	0.971	1.08	1.036	0.3996	1.077	0.2281	1.039	0.39926
A0A287ADX8	SUZ RNA binding domain containing 1 OS=Sus scrofa OX=9823 GN=SZRD1	SZRD1	14.789	18	2	3	2	1.257	0.971	1.059	1.037	0.958	0.992	0.988	0.9	0.867	0.909	0.31754	0.838	0.113319	0.922	0.143817
A0A287ADY3	Rho GTPase activating protein 30 OS=Sus scrofa OX=9823 GN=ARHGAP30	ARHGAP30	113.01	6.3	6	8	6	1.068	0.96	1	1.03	0.997	0.965	1.019	1.025	1.011	0.988	0.7703	1.009	0.78328	1.021	0.33274
A0A287AE16	Adseverin OS=Sus scrofa OX=9823 GN=SCIN	SCIN	80.617	20.6	14	21	14	0.894	0.897	0.894	1.05	1.074	1.047	1.019	1.073	1.043	1.181	0.0023806	1.168	0.0092369	0.989	0.53246
A0A287AE20	PITH domain containing 1 OS=Sus scrofa OX=9823 GN=PITHD1	PITHD1	13.72	19.5	2	5	2
A0A287AE24	Uncharacterized protein OS=Sus scrofa OX=9823	---	23.512	41.6	9	23	5	1.004	1.08	1.093	0.931	0.922	0.936	1	1.016	1.01	0.878	0.0085449	0.952	0.149303	1.085	0.00021893
A0A287AE45	Uncharacterized protein OS=Sus scrofa OX=9823 GN=AHNAK2	AHNAK2	382.3	20.7	9	12	9	1.095	1.116	1.107	0.925	0.974	0.898	0.954	0.954	1.001	0.843	0.0021574	0.877	0.00147762	1.04	0.23928
A0A287AE49	Apoptotic protease-activating factor 1 OS=Sus scrofa OX=9823 GN=APAF1	APAF1	136.88	5.4	6	6	6	1.006	1.025	1.033	0.977	0.973	0.998	1.039	1.088	1.039	0.962	0.025543	1.033	0.1321	1.074	0.0145615
A0A287AE59	Family with sequence similarity 185 member A OS=Sus scrofa OX=9823 GN=FAM185A	FAM185A	37.989	5.9	2	2	2
A0A287AE62	Uncharacterized protein OS=Sus scrofa OX=9823 GN=TBCE	TBCE	51.452	8.7	4	4	4
A0A287AE63	Neural precursor cell expressed, developmentally down-regulated 8 OS=Sus scrofa OX=9823 GN=NEDD8	NEDD8	7.986	12.7	1	4	1	0.989	1.098	1.008	0.947	1.045	1.009	1.092	0.847	0.967	0.97	0.51728	0.939	0.44788	0.968	0.66566
A0A287AE76	60S ribosomal protein L4 OS=Sus scrofa OX=9823 GN=RPL4	RPL4	44.692	33.4	14	34	14	1.011	0.975	1.041	1.016	1.024	0.998	0.989	0.988	0.996	1.004	0.8568	0.982	0.4533	0.979	0.054677
A0A287AE88	Uncharacterized protein OS=Sus scrofa OX=9823 GN=NDUFA9	NDUFA9	42.007	19.9	6	10	6	0.903	0.947	0.991	1.044	1.029	1.029	1.025	1.012	0.955	1.092	0.031441	1.053	0.20662	0.965	0.176439
A0A287AEA2	Peptidyl-prolyl cis-trans isomerase OS=Sus scrofa OX=9823 GN=PPIC	PPIC	22.743	10.9	2	6	2	1.069	1.025	0.997	0.95	0.973	1.199	1.008	0.95	0.894	1.01	0.95304	0.923	0.112924	0.914	0.35128
A0A287AEA4	AUP1, lipid droplet regulating VLDL assembly factor OS=Sus scrofa OX=9823 GN=AUP1	AUP1	40.671	14.9	5	7	5	0.744	1.012	0.877	1.006	1.656	0.743	0.866	1.049	1.039	1.293	0.44924	1.122	0.33434	0.868	0.7276
A0A287AEA8	Cytosolic thiouridylase subunit 2 OS=Sus scrofa OX=9823 GN=CTU2	CTU2	45.876	3.4	1	1	1	1.083	0.737	0.714	0.978	1.155	0.932	1.122	1.215	1.103	1.21	0.24126	1.358	0.077864	1.122	0.171842
A0A287AEB9	Cytochrome P450 family 7 subfamily B member 1 OS=Sus scrofa OX=9823 GN=CYP7B1	CYP7B1	50.352	2.5	1	1	1
A0A287AEC0	Basic leucine zipper and W2 domain-containing protein 2 OS=Sus scrofa OX=9823 GN=BZW2	BZW2	48.162	19.6	9	11	9	1.003	0.984	1.005	1.03	1.012	1.04	0.943	1.032	1.023	1.03	0.047104	1.002	0.96868	0.973	0.39482
A0A287AED6	DnaJ heat shock protein family (Hsp40) member B12 OS=Sus scrofa OX=9823 GN=DNAJB12	DNAJB12	39.243	2.6	1	1	1	1.039	1.077	1.074	0.887	0.915	1.034	1.031	0.949	1.005	0.889	0.06796	0.936	0.068979	1.053	0.37394
A0A287AEE3	Adenosine deaminase 2 OS=Sus scrofa OX=9823 GN=ADA2	ADA2	54.695	10.5	5	7	5	0.963	1.036	0.961	1.071	1.031	1.017	1.092	0.945	0.927	1.054	0.144996	1.001	0.9902	0.95	0.37804
A0A287AEE8	Notch 2 OS=Sus scrofa OX=9823 GN=NOTCH2	NOTCH2	256.17	2	4	4	4
A0A287AEG1	Microtubule-actin crosslinking factor 1 OS=Sus scrofa OX=9823 GN=MACF1	MACF1	511.17	20.3	79	97	78	1.03	0.972	0.976	0.997	0.979	1.004	1.012	1.02	1.051	1.001	0.96404	1.035	0.187196	1.035	0.069318
A0A287AEG8	60S ribosomal protein L10 OS=Sus scrofa OX=9823 GN=RPL10	RPL10	18.591	31.3	5	21	5	1.006	1.053	1.056	0.993	0.959	0.96	0.97	1.028	0.983	0.935	0.025803	0.957	0.135099	1.024	0.32978
A0A287AEG9	Transmembrane protein 131 OS=Sus scrofa OX=9823 GN=TMEM131	TMEM131	185.43	0.5	1	1	1
A0A287AEH0	Proteasome 26S subunit, non-ATPase 7 OS=Sus scrofa OX=9823 GN=PSMD7	PSMD7	37.011	15.7	6	13	6	1.027	0.986	1.05	1.059	0.974	0.997	0.945	0.977	1.04	0.989	0.73792	0.967	0.36874	0.978	0.57542
A0A287AEH1	Laminin subunit alpha 5 OS=Sus scrofa OX=9823 GN=LAMA5	LAMA5	395.66	4.9	14	19	14	0.932	0.904	1.047	0.933	1	0.975	1.103	1.091	1.016	1.009	0.84488	1.113	0.102777	1.104	0.039657
A0A287AEI6	Importin subunit alpha OS=Sus scrofa OX=9823 GN=KPNA6	KPNA6	59.814	15.1	7	9	5	1.134	0.973	0.879	0.926	1.071	0.894	1.153	0.913	1.076	0.968	0.76234	1.052	0.63664	1.087	0.40888
A0A287AEK2	cAMP-dependent protein kinase type II-alpha regulatory subunit OS=Sus scrofa OX=9823 GN=PRKAR2A	PRKAR2A	43.714	39.8	13	19	11	1.002	0.972	0.976	1.01	1.032	1.043	1.02	0.998	0.986	1.046	0.028998	1.018	0.2577	0.974	0.124103
A0A287AEP6	Small acidic protein OS=Sus scrofa OX=9823 GN=C11orf58	C11orf58	20.162	17.7	4	12	4	1.081	0.978	1	1.031	1.048	0.981	0.969	0.972	1.001	1	0.98216	0.962	0.29974	0.961	0.156338
A0A287AEU6	Methionine adenosyltransferase 2 subunit beta OS=Sus scrofa OX=9823 GN=MAT2B	MAT2B	36.528	38.7	10	19	10	0.97	0.998	1.044	1.021	0.989	0.987	0.999	0.993	0.992	0.995	0.85598	0.991	0.71968	0.996	0.72444
A0A287AEU7	MutS homolog 6 OS=Sus scrofa OX=9823 GN=MSH6	MSH6	133.4	13.7	13	14	13	1.032	1.011	1.003	0.991	1.003	1.024	0.95	0.99	0.991	0.991	0.50946	0.962	0.077016	0.971	0.157223
A0A287AEV6	CD99 molecule (Xg blood group) OS=Sus scrofa OX=9823 GN=CD99	CD99	18.588	28.6	3	8	3	0.94	0.995	0.934	1.125	0.998	1.033	1.076	0.933	0.962	1.1	0.081983	1.036	0.52254	0.941	0.33774
A0A287AEW1	IK cytokine OS=Sus scrofa OX=9823 GN=IK	IK	64.063	6.8	4	7	4	1.005	1.047	0.988	0.992	0.958	0.988	1.005	0.961	1.08	0.966	0.171918	1.002	0.9782	1.037	0.38218
A0A287AEW3	28S ribosomal protein S23, mitochondrial OS=Sus scrofa OX=9823 GN=MRPS23	MRPS23	21.633	10.5	2	3	2	1.061	0.964	0.922	1.123	1.133	1.006	0.927	0.913	0.97	1.107	0.14516	0.954	0.36488	0.861	0.024979
A0A287AEX3	Dimethylarginine dimethylaminohydrolase 1 OS=Sus scrofa OX=9823 GN=DDAH1	DDAH1	20.146	40.7	5	8	5	1.021	0.966	0.989	0.934	0.939	0.954	1.081	1.095	1.092	0.95	0.04142	1.098	0.0047378	1.156	4.076e-05
A0A287AEX5	T-cell surface glycoprotein CD5 precursor OS=Sus scrofa OX=9823 GN=CD5	CD5	50.274	3.3	1	1	1
A0A287AEZ9	A-kinase anchoring protein 7 OS=Sus scrofa OX=9823 GN=AKAP7	AKAP7	47.61	7.5	3	4	1
A0A287AF07	NAD-dependent protein deacylase sirtuin-5, mitochondrial OS=Sus scrofa OX=9823 GN=SIRT5	SIRT5	33.42	8.8	2	2	2	0.85	0.954	0.901	1.03	1.047	1.018	1.051	1.024	1.134	1.144	0.0167211	1.186	0.01944	1.037	0.3276
A0A287AF08	Selenoprotein H OS=Sus scrofa OX=9823 GN=SELENOH	SELENOH	13.388	24.6	3	4	3	1.018	0.994	1.126	1.052	1.07	0.98	0.964	0.924	0.88	0.989	0.82888	0.882	0.054862	0.892	0.03898
A0A287AF16	Nuclear transcription factor, X-box binding like 1 OS=Sus scrofa OX=9823 GN=NFXL1	NFXL1	98.207	6.7	4	4	4	0.434	0.474	1.465	1.27	1.418	0.777	1.039	1.575	0.548	1.46	0.3028	1.332	0.50564	0.913	0.70026
A0A287AF17	Uncharacterized protein OS=Sus scrofa OX=9823 GN=LOC110255360	LOC110255360	279.21	21.6	51	80	3	1.018	1.028	0.997	1.162	0.961	1.127	0.749	0.975	1.005	1.068	0.4042	0.897	0.33768	0.84	0.178736
A0A287AF52	G protein-coupled receptor 107 OS=Sus scrofa OX=9823 GN=GPR107	GPR107	62.278	4	2	2	2
A0A287AF64	Uncharacterized protein OS=Sus scrofa OX=9823	---	58.882	3.2	1	1	1	1.044	1	0.858	0.97	1.034	0.931	1.193	0.982	1.004	1.011	0.84604	1.095	0.34868	1.083	0.3253
A0A287AF78	Uncharacterized protein OS=Sus scrofa OX=9823 GN=ENAH	ENAH	22.478	39	5	9	5	1.026	1.055	1.033	1.036	1.081	1.024	0.997	0.955	0.927	1.009	0.67184	0.925	0.025638	0.917	0.031138
A0A287AF82	Mitochondrial ribosomal protein L1 OS=Sus scrofa OX=9823 GN=MRPL1	MRPL1	34.322	7.2	2	2	2	1.009	0.996	1.032	1.061	0.936	1.087	1.001	0.96	0.935	1.015	0.79262	0.954	0.099664	0.939	0.29178
A0A287AFA0	Uncharacterized protein OS=Sus scrofa OX=9823 GN=TMPRSS2	TMPRSS2	57.305	1.9	1	1	1
A0A287AFA3	Zinc finger CCHC-type containing 6 OS=Sus scrofa OX=9823 GN=ZCCHC6	ZCCHC6	167.3	4.7	6	6	6	1.1	0.911	1.009	0.925	1.104	0.967	1.131	0.89	0.975	0.992	0.92254	0.992	0.91608	1	0.98242
A0A287AFB6	Lys-63-specific deubiquitinase BRCC36 OS=Sus scrofa OX=9823 GN=BRCC3	BRCC3	30.373	11.6	3	4	3
A0A287AFD8	Proteasome assembly chaperone 2 OS=Sus scrofa OX=9823 GN=PSMG2	PSMG2	26.466	14.6	3	5	3	0.98	0.991	0.999	1.034	0.97	1.127	0.96	0.979	0.913	1.054	0.3651	0.96	0.129824	0.911	0.129221
A0A287AFD9	Gamma-aminobutyric acid type A receptor beta1 subunit OS=Sus scrofa OX=9823 GN=GABRB1	GABRB1	54.144	1.5	1	1	1	0.999	1.502	1.033	0.974	0.927	0.904	0.919	0.86	0.879	0.794	0.182041	0.752	0.180262	0.948	0.141064
A0A287AFE8	Uncharacterized protein OS=Sus scrofa OX=9823	---	15.392	6.9	1	2	1
A0A287AFF5	Peptidyl-prolyl cis-trans isomerase OS=Sus scrofa OX=9823 GN=PPIL1	PPIL1	18.237	36.1	5	7	5	0.991	0.999	0.994	0.969	0.963	1.041	1.032	1.01	1.046	0.996	0.87926	1.035	0.03096	1.039	0.22714
A0A287AFH3	Dolichyl-diphosphooligosaccharide--protein glycosyltransferase subunit STT3A OS=Sus scrofa OX=9823 GN=STT3A	STT3A	80.624	13.5	10	13	10	1.06	1.01	0.948	1.011	1.054	1.038	0.97	1.034	0.899	1.028	0.45326	0.962	0.48866	0.936	0.182075
A0A287AFN2	Thymidylate synthase OS=Sus scrofa OX=9823 GN=TYMS	TYMS	42.168	15	5	6	5	1.05	0.993	0.965	1.089	1.152	1.094	0.926	0.848	0.895	1.109	0.027882	0.887	0.028423	0.8	0.0020575
A0A287AFQ3	CAP-Gly domain containing linker protein 1 OS=Sus scrofa OX=9823 GN=CLIP1	CLIP1	136.68	25.7	30	38	1	1.033	0.993	0.973	1.135	1.066	1.18	0.89	0.892	0.855	1.127	0.025656	0.879	0.0045048	0.78	0.00161691
A0A287AFU8	Methylmalonyl-CoA mutase, mitochondrial OS=Sus scrofa OX=9823 GN=MUT	MUT	78.276	2.5	2	3	2	0.772	0.876	1.016	0.981	0.868	0.936	1.222	1.022	1.307	1.045	0.60006	1.333	0.05592	1.275	0.042877
A0A287AFW2	Probable aminopeptidase NPEPL1 OS=Sus scrofa OX=9823 GN=NPEPL1	NPEPL1	52.155	14.1	5	6	5	0.954	0.913	1.019	1.015	1.03	1.012	1.007	0.992	1.03	1.059	0.144838	1.05	0.21802	0.991	0.48904
A0A287AFW7	OTU deubiquitinase with linear linkage specificity OS=Sus scrofa OX=9823 GN=OTULIN	OTULIN	40.012	16.5	6	7	6	1.071	0.913	1.069	0.969	1.045	0.936	1.128	0.896	0.876	0.966	0.62694	0.95	0.59716	0.983	0.80708
A0A287AG02	Leucine rich repeats and IQ motif containing 3 OS=Sus scrofa OX=9823 GN=LRRIQ3	LRRIQ3	67.127	4.8	2	2	2	0.663	0.764	0.688	0.98			1.299	1.259	1.377	1.39		1.861	0.00023932	1.338
A0A287AG13	Apolipoprotein B-100 OS=Sus scrofa OX=9823 GN=APOB	APOB	517.25	13.3	56	73	55	0.915	0.937	0.931	1.069	1.065	1.072	0.978	0.993	1.03	1.152	4.1371e-05	1.078	0.0113029	0.936	0.050463
A0A287AG15	Penta-EF-hand domain containing 1 OS=Sus scrofa OX=9823 GN=PEF1	PEF1	30.452	14.5	5	7	5	1.01	1.005	1.061	0.995	1.021	0.956	0.991	0.978	0.943	0.966	0.25262	0.947	0.074419	0.98	0.45016
A0A287AG38	KIAA0930 OS=Sus scrofa OX=9823 GN=KIAA0930	KIAA0930	50.666	9.6	4	6	4
A0A287AG39	Small nuclear ribonucleoprotein-associated protein OS=Sus scrofa OX=9823	---	23.67	16	4	8	1
A0A287AG43	Glucocorticoid modulatory element binding protein 2 OS=Sus scrofa OX=9823 GN=GMEB2	GMEB2	56.384	5.6	3	3	2	0.981	1.005	1.016	1.108	1.063	0.965	0.95	0.978	0.947	1.045	0.37506	0.958	0.041305	0.917	0.113223
A0A287AG50	CKLF like MARVEL transmembrane domain containing 6 OS=Sus scrofa OX=9823 GN=CMTM6	CMTM6	17.024	19.2	2	5	2	0.938	1.07	1.053	1.054	0.913	1.016	0.935	1.03	0.952	0.975	0.6867	0.953	0.40566	0.978	0.70314
A0A287AG70	Glutathione peroxidase OS=Sus scrofa OX=9823 GN=GPX1	GPX1	22.616	69.4	13	40	13	0.991	1.046	1.065	1.018	0.94	1.007	0.981	0.928	1.041	0.956	0.24196	0.951	0.26832	0.995	0.90002
A0A287AGA7	Phosphatidylinositol-4-phosphate 3-kinase catalytic subunit type 2 beta OS=Sus scrofa OX=9823 GN=PIK3C2B	PIK3C2B	154.61	0.8	1	1	1
A0A287AGC6	CTD small phosphatase 1 OS=Sus scrofa OX=9823 GN=CTDSP1	CTDSP1	29.121	11.2	3	5	3	1.067	1.005	1.037	0.949	1.027	1.089	0.961	0.949	0.932	0.986	0.73874	0.914	0.0099772	0.927	0.144138
A0A287AGC8	SKI proto-oncogene OS=Sus scrofa OX=9823 GN=SKI	SKI	79.84	1	1	1	1	1.095	0.85	0.982	1.043	1.056	0.934	0.972	1.08	1.016	1.036	0.65998	1.048	0.55256	1.012	0.81996
A0A287AGC9	Sterile alpha motif domain containing 9 OS=Sus scrofa OX=9823 GN=SAMD9	SAMD9	181.23	0.6	1	1	1	1.053	1.076	1.017	0.953	0.871	0.962	1.079	0.92	1.082	0.886	0.026624	0.979	0.6975	1.106	0.187684
A0A287AGD1	Cell division cycle and apoptosis regulator 1 OS=Sus scrofa OX=9823 GN=CCAR1	CCAR1	131.53	17.2	17	23	17	1.018	0.991	1.029	0.998	1.005	1.028	0.975	0.984	0.979	0.998	0.88216	0.967	0.044122	0.969	0.028997
A0A287AGD7	Nucleoporin 205 OS=Sus scrofa OX=9823 GN=NUP205	NUP205	223.34	9.2	16	21	16	1.04	0.993	0.999	1.002	0.979	0.992	0.994	0.984	1.02	0.981	0.29016	0.989	0.56882	1.008	0.54694
A0A287AGE8	Phosphorylase b kinase regulatory subunit OS=Sus scrofa OX=9823 GN=PHKB	PHKB	125.18	6.4	7	9	7	0.994	1.036	0.994	0.923	1.03	0.901	1.073	1.008	1.05	0.944	0.24328	1.035	0.20556	1.097	0.105301
A0A287AGG3	Proteasome subunit beta type OS=Sus scrofa OX=9823 GN=PSMB5	PSMB5	30.16	19.3	5	5	5	1.155	0.992	1.023	0.944	1.035	0.877	0.973	0.974	1.049	0.901	0.192642	0.945	0.35634	1.049	0.4109
A0A287AGI1	Uncharacterized protein OS=Sus scrofa OX=9823 GN=ASL	ASL	49.657	9.2	4	5	4	0.901	0.943	0.895	1.015	0.984	1.011	1.119	1.063	1.079	1.099	0.0077571	1.191	0.00146293	1.083	0.0115228
A0A287AGJ2	Uncharacterized protein OS=Sus scrofa OX=9823 GN=SP140	SP140	85.011	3.8	2	2	2	1.167		0.956	1.072	0.98	1.146	0.892	0.975	0.87	1.004	0.94454	0.859	0.187063	0.856	0.053239
A0A287AGJ3	Hydroxysteroid 17-beta dehydrogenase 14 OS=Sus scrofa OX=9823 GN=HSD17B14	HSD17B14	25.36	30.6	6	7	6	1.12	1.065	1.061	0.946	0.914	0.944	1.005	0.96	0.991	0.864	0.0021194	0.911	0.0133598	1.054	0.039684
A0A287AGL9	Liver carboxylesterase precursor OS=Sus scrofa OX=9823 GN=LOC100736962	LOC100736962	26.461	7.6	1	1	1
A0A287AGN1	Uncharacterized protein OS=Sus scrofa OX=9823 GN=APOBR	APOBR	143.77	17.6	20	27	20	0.97	0.914	0.872	0.945	0.978	0.968	1.111	1.123	1.163	1.049	0.20804	1.233	0.0034156	1.175	0.00071703
A0A287AGR0	NSFL1 cofactor p47 OS=Sus scrofa OX=9823 GN=NSFL1C	NSFL1C	37.595	50.7	14	28	14	1.018	1.042	1.022	0.975	1.011	1.02	0.977	1.012	0.958	0.975	0.182124	0.956	0.062703	0.98	0.40046
A0A287AGS1	Store-operated calcium entry associated regulatory factor OS=Sus scrofa OX=9823 GN=SARAF	SARAF	36.785	6.8	2	2	2
A0A287AGT7	Sorting nexin OS=Sus scrofa OX=9823 GN=SNX6	SNX6	46.606	40.9	16	31	15	0.994	0.971	1.001	1.003	0.982	1.008	0.976	0.992	0.987	1.009	0.49792	0.996	0.74252	0.987	0.24446
A0A287AGU2	ATP synthase subunit alpha OS=Sus scrofa OX=9823 GN=ATP5F1A	ATP5F1A	59.428	44.5	28	80	28	0.995	1.018	1.024	1.006	1	0.997	0.968	0.98	1.009	0.989	0.28862	0.974	0.150978	0.985	0.28322
A0A287AGU5	Round spermatid basic protein 1 like OS=Sus scrofa OX=9823 GN=RSBN1L	RSBN1L	94.711	3.1	2	2	2	0.914	0.915	0.433	0.879	1.279	1.133	1.427	0.991	1.043	1.455	0.198898	1.53	0.162764	1.052	0.7735
A0A287AGX7	Zinc finger CCCH-type containing 7B OS=Sus scrofa OX=9823 GN=ZC3H7B	ZC3H7B	109.67	2.9	3	4	3	1.106	1.133	0.921	1.073	0.95	0.889	1.019	1.026	0.906	0.922	0.39924	0.934	0.43988	1.013	0.8395
A0A287AGY9	Transducin beta like 3 OS=Sus scrofa OX=9823 GN=TBL3	TBL3	78.252	1.3	1	1	1	0.929	1.032	0.883	1.015	1.06	1.062	1.008	0.865	1.151	1.103	0.106944	1.063	0.58052	0.964	0.6332
A0A287AH02	Fibulin 2 OS=Sus scrofa OX=9823 GN=FBLN2	FBLN2	120.8	6.6	7	8	7	1.258	1.206	1.129	1.065	0.715	0.873	0.927	0.905	0.926	0.738	0.057242	0.768	0.00124432	1.04	0.69648
A0A287AH08	GLE1, RNA export mediator OS=Sus scrofa OX=9823 GN=GLE1	GLE1	72.103	5.6	4	5	4
A0A287AH21	Cation-transporting ATPase OS=Sus scrofa OX=9823 GN=ATP13A2	ATP13A2	114.61	1	1	1	1	0.955	0.922	1.003	1.044	1.014	0.996	1.031	0.911	1.132	1.06	0.102581	1.067	0.41118	1.007	0.9676
A0A287AH59	Syntaxin 3 OS=Sus scrofa OX=9823 GN=STX3	STX3	30.2	5	1	1	1
A0A287AH76	Protein SSXT OS=Sus scrofa OX=9823 GN=SS18	SS18	31.45	4.9	1	1	1
A0A287AH85	Adenylate kinase 2, mitochondrial OS=Sus scrofa OX=9823 GN=AK2	AK2	25.64	33.8	7	18	7	0.866	0.929	0.94	1.044	1.032	1.025	1.047	1.043	1.118	1.134	0.0084822	1.173	0.0094386	1.035	0.22234
A0A287AH93	Extended synaptotagmin 1 OS=Sus scrofa OX=9823 GN=ESYT1	ESYT1	115.17	19.4	18	30	18	1.037	1.022	1.017	0.935	0.98	1	0.99	1.032	1.006	0.948	0.059537	0.984	0.3038	1.039	0.175685
A0A287AHB8	Hephaestin OS=Sus scrofa OX=9823 GN=HEPH	HEPH	116.09	2.6	2	2	2
A0A287AHC2	Glucosamine-6-phosphate isomerase OS=Sus scrofa OX=9823 GN=GNPDA1	GNPDA1	35.066	24.3	7	16	6	0.96	0.969	1.052	0.918	0.994	1.023	1.05	1.033	0.979	0.985	0.73594	1.027	0.49118	1.043	0.32904
A0A287AHC5	Guanine nucleotide-binding protein subunit gamma OS=Sus scrofa OX=9823 GN=GNG7	GNG7	7.5517	23.5	1	1	1	0.86	0.815	1.112	1.063	1.083	0.894	0.958	1.1	1.125	1.091	0.4607	1.142	0.2661	1.047	0.5832
A0A287AHC7	A-kinase anchoring protein 17A OS=Sus scrofa OX=9823 GN=AKAP17A	AKAP17A	83.896	3.1	2	3	2	1.315	0.998	1.136	0.953	0.924	0.947	0.993	0.84	0.919	0.819	0.137183	0.798	0.07606	0.975	0.59926
A0A287AHD3	Echinoderm microtubule associated protein like 4 OS=Sus scrofa OX=9823 GN=EML4	EML4	109.1	19	16	21	16	1.077	1.011	1.052	1.033	0.999	1.006	0.968	0.989	0.981	0.968	0.194896	0.936	0.02736	0.967	0.04916
A0A287AHE4	Integrin subunit alpha 7 OS=Sus scrofa OX=9823 GN=ITGA7	ITGA7	120.64	7.1	7	11	7	1.071	1.031	0.995	1.001	0.974	1.04	0.866	1.069	0.98	0.974	0.40142	0.941	0.37972	0.967	0.5934
A0A287AHF2	N(alpha)-acetyltransferase 30, NatC catalytic subunit OS=Sus scrofa OX=9823 GN=NAA30	NAA30	39.052	6.7	2	2	2
A0A287AHI3	Protein phosphatase 6 regulatory subunit 3 OS=Sus scrofa OX=9823 GN=PPP6R3	PPP6R3	78.667	13.2	8	12	8	1.024	1	1.02	1.036	1.021	1.038	1.011	0.943	1.073	1.017	0.138238	0.994	0.86416	0.978	0.59538
A0A287AHI6	Uncharacterized protein OS=Sus scrofa OX=9823 GN=TRAPPC10	TRAPPC10	140.06	6.2	5	6	5	0.877	1.239	1.031	1.035	1.057	0.824	1.161	0.888	0.878	0.927	0.60098	0.93	0.62712	1.004	0.99146
A0A287AHL4	Tubulin beta chain OS=Sus scrofa OX=9823 GN=LOC100624785	LOC100624785	49.936	40	14	187	1	1.103	1.084	1.048	0.858	0.876	0.86	1.027	1.128	1.04	0.802	0.000178068	0.988	0.71198	1.232	0.0023226
A0A287AHL9	ArfGAP with GTPase domain, ankyrin repeat and PH domain 1 OS=Sus scrofa OX=9823 GN=AGAP1	AGAP1	97.554	1.2	1	1	1	0.878	0.977	0.983	0.887	0.851	0.899	1.182	1.132	1.221	0.929	0.146238	1.246	0.0066999	1.341	0.00043843
A0A287AHM1	ATP synthase subunit gamma OS=Sus scrofa OX=9823 GN=ATP5F1C	ATP5F1C	32.862	23.6	7	28	7	0.987	1.009	1.044	1.027	1.014	1.011	0.995	0.961	0.971	1.004	0.818	0.963	0.122519	0.959	0.021143
A0A287AHM8	Torsin 1A interacting protein 1 OS=Sus scrofa OX=9823 GN=TOR1AIP1	TOR1AIP1	64.993	32.9	14	20	13	0.976	0.985	1.019	0.96	1.04	0.98	1.019	1.038	0.942	1	0.98886	1.006	0.87046	1.006	0.88176
A0A287AHN0	Phosphoinositide 3-kinase adapter protein 1 OS=Sus scrofa OX=9823 GN=PIK3AP1	PIK3AP1	91.555	11.8	9	14	9	1.064	0.954	1.051	1.039	1.018	0.96	0.948	0.963	0.896	0.983	0.7141	0.915	0.096216	0.93	0.089278
A0A287AHN6	Zinc finger protein 740 OS=Sus scrofa OX=9823 GN=ZNF740	ZNF740	21.885	6.7	1	2	1
A0A287AHQ0	Acetyl-CoA acetyltransferase 2 OS=Sus scrofa OX=9823 GN=ACAT2	ACAT2	41.354	21.7	6	8	6	1.016	0.942	0.963	1.069	1.016	0.949	0.938	0.995	1.055	1.039	0.41632	1.023	0.6169	0.985	0.7685
A0A287AHQ6	TATA-box binding protein associated factor 4 OS=Sus scrofa OX=9823 GN=TAF4	TAF4	74.084	2.9	2	2	2
A0A287AHT4	SOS Ras/Rac guanine nucleotide exchange factor 1 OS=Sus scrofa OX=9823 GN=SOS1	SOS1	127.13	2.7	2	2	2
A0A287AHT5	Small nuclear ribonucleoprotein D1 polypeptide OS=Sus scrofa OX=9823 GN=SNRPD1	SNRPD1	12.393	11.6	2	4	2	1.075	1.009	0.89	1.038	0.994	1.056	1.042	0.976	0.943	1.038	0.5273	0.996	0.97376	0.959	0.28356
A0A287AHT8	Kininogen 1 OS=Sus scrofa OX=9823 GN=KNG1	KNG1	47.854	16.2	5	6	5	1.076	1.128	1.097	0.916	0.968	0.992	0.93	0.967	0.917	0.871	0.0071385	0.852	0.00159844	0.978	0.4916
A0A287AHU4	Crooked neck pre-mRNA splicing factor 1 OS=Sus scrofa OX=9823 GN=CRNKL1	CRNKL1	83.578	9.4	6	6	6	0.946	1.061	0.988	1.025	1.051	1.043	0.998	1.001	0.897	1.041	0.291	0.967	0.53006	0.929	0.109996
A0A287AHX3	Glycosylphosphatidylinositol specific phospholipase D1 OS=Sus scrofa OX=9823 GN=GPLD1	GPLD1	92.672	1.1	1	1	1
A0A287AHY4	Uncharacterized protein OS=Sus scrofa OX=9823 GN=LOC100519082	LOC100519082	13.63	21	1	1	1	1.694	1.187	0.911	0.892	0.973	1.018	0.516	0.985	0.889	0.76	0.2567	0.63	0.158256	0.829	0.33542
A0A287AI01	Aspartate beta-hydroxylase OS=Sus scrofa OX=9823 GN=ASPH	ASPH	85.121	28	17	31	17	0.947	0.981	0.98	0.985	0.969	0.972	1.019	1.005	1.053	1.006	0.64524	1.058	0.035302	1.052	0.027097
A0A287AI22	NHP2-like protein 1 OS=Sus scrofa OX=9823 GN=SNU13	SNU13	13.527	27.9	3	9	3	1.069	1.02	1.006	0.956	1.084	1.019	0.971	0.953	0.938	0.988	0.77084	0.925	0.020304	0.936	0.157415
A0A287AI23	Discs large MAGUK scaffold protein 3 OS=Sus scrofa OX=9823 GN=DLG3	DLG3	57.862	6.2	2	3	1
A0A287AI37	Adducin 1 OS=Sus scrofa OX=9823 GN=ADD1	ADD1	84.952	27.5	15	22	2
A0A287AI71	Pinin OS=Sus scrofa OX=9823 GN=PNN	PNN	80.962	15.4	12	18	12	1.002	1.017	0.998	0.992	0.992	1.002	0.988	0.991	0.967	0.99	0.195581	0.976	0.068256	0.987	0.182816
A0A287AI73	Autophagy-related protein 2 homolog A OS=Sus scrofa OX=9823 GN=ATG2A	ATG2A	205.46	2.8	5	5	5	0.758	0.909	1.155	1.175	1.162	0.911	0.964	1.112	0.854	1.151	0.3701	1.038	0.7618	0.902	0.41612
A0A287AI92	Carbonic anhydrase 1 OS=Sus scrofa OX=9823 GN=CA1	CA1	28.975	40.6	8	21	8	0.999	1.049	1.056	0.855	0.915	0.912	1.04	1.122	1.136	0.864	0.0065422	1.062	0.139339	1.23	0.00428
A0A287AIB3	Centromere protein C OS=Sus scrofa OX=9823 GN=CENPC	CENPC	99.423	1.7	1	1	1
A0A287AID2	Tropomyosin alpha-3 chain OS=Sus scrofa OX=9823 GN=TPM3	TPM3	32.929	57.4	26	93	5	0.981	0.986	0.967	1	1	1.011	0.982	0.987	0.984	1.026	0.0195765	1.006	0.34122	0.981	0.0078042
A0A287AIE6	ATPase ASNA1 OS=Sus scrofa OX=9823 GN=ASNA1	ASNA1	38.792	4.6	2	2	2	0.992	1.02	0.986	1.002	0.99	1.007	1.025	0.996	0.996	1	0.97302	1.006	0.67772	1.006	0.6135
A0A287AIF6	Death inducer-obliterator 1 OS=Sus scrofa OX=9823 GN=DIDO1	DIDO1	234.17	2.5	5	6	5	1.017	0.922	0.927	1.189	1.004	1.056	1.08	0.796	1.02	1.134	0.105182	1.01	0.97786	0.891	0.31822
A0A287AIG1	Cystin 1 OS=Sus scrofa OX=9823 GN=CYS1	CYS1	15.712	26.3	2	4	2
A0A287AIG2	Transmembrane protein 165 OS=Sus scrofa OX=9823 GN=TMEM165	TMEM165	35.032	7.7	2	2	2	1.032	1.03	0.947	0.917	0.855	0.963	1.097	1.063	1.116	0.909	0.098339	1.089	0.054125	1.198	0.0082801
A0A287AIH4	EMSY, BRCA2 interacting transcriptional repressor OS=Sus scrofa OX=9823 GN=EMSY	EMSY	115.58	1	1	1	1	1.318	0.788	0.713	1.489	0.624	1.36	0.674	1.455	0.673	1.232	0.62336	0.994	0.91022	0.807	0.59652
A0A287AII2	Target of myb1 membrane trafficking protein OS=Sus scrofa OX=9823 GN=TOM1	TOM1	52.784	19.3	8	9	8	1.047	1.042	1.014	1.002	1.003	0.979	0.971	0.931	1.009	0.962	0.037339	0.938	0.063737	0.976	0.36182
A0A287AII8	1,4-alpha-glucan branching enzyme 1 OS=Sus scrofa OX=9823 GN=GBE1	GBE1	80.824	16.1	9	10	9	0.951	1.007	1.012	1.028	1.022	0.973	0.994	0.916	1.09	1.018	0.5389	1.01	0.8906	0.992	0.8619
A0A287AIJ3	Glutathione peroxidase OS=Sus scrofa OX=9823 GN=GPX3	GPX3	25.684	12	2	3	2	0.78	0.869	1.087	1.068	0.987	0.896	1.172	1.106	1.038	1.079	0.49408	1.212	0.125337	1.124	0.12852
A0A287AIK5	IKAROS family zinc finger 1 OS=Sus scrofa OX=9823 GN=IKZF1	IKZF1	55.867	8.8	4	6	2	1.13	0.854	0.938	0.94	1.186	1.002	1.046	0.993	0.934	1.07	0.55028	1.017	0.80716	0.95	0.57292
A0A287AIK7	MIS12, kinetochore complex component OS=Sus scrofa OX=9823 GN=MIS12	MIS12	24.141	4.9	1	1	1	0.94	0.976	0.956	1.135	0.949	1.036	1.048	1.065	0.913	1.086	0.20308	1.054	0.37444	0.97	0.69228
A0A287AIK8	C-terminal binding protein 2 OS=Sus scrofa OX=9823 GN=CTBP2	CTBP2	48.958	16.2	7	10	3	0.961	1.089	0.942	0.987	1.084	0.995	1.008	0.971	0.971	1.025	0.66228	0.986	0.80814	0.962	0.30902
A0A287AIM5	CCHC-type zinc finger nucleic acid binding protein OS=Sus scrofa OX=9823 GN=CNBP	CNBP	18.742	44.7	8	16	8	1.022	1.069	1.075	1.079	0.958	1.009	0.866	0.959	1.018	0.962	0.35612	0.898	0.092862	0.933	0.2971
A0A287AIQ0	Transducin beta like 1 X-linked receptor 1 OS=Sus scrofa OX=9823 GN=TBL1XR1	TBL1XR1	46.221	20.1	6	7	3	1.117	0.897	1.009	0.879	0.978	1.001	1.15	0.911	1.075	0.945	0.51326	1.037	0.72088	1.097	0.32468
A0A287AIQ8	ATPase H+ transporting V1 subunit E1 OS=Sus scrofa OX=9823 GN=ATP6V1E1	ATP6V1E1	26.123	44.2	11	24	11	1.027	0.986	1.011	0.946	0.973	1.008	1.028	1.013	0.988	0.968	0.20794	1.002	0.92514	1.035	0.187704
A0A287AIS0	Factor interacting with PAPOLA and CPSF1 OS=Sus scrofa OX=9823 GN=FIP1L1	FIP1L1	61.856	10.8	4	9	4	1.041	0.968	1.036	0.97	1.033	0.962	0.95	1.001	0.991	0.974	0.45932	0.966	0.29616	0.992	0.79844
A0A287AIW3	Dynein cytoplasmic 1 light intermediate chain 1 OS=Sus scrofa OX=9823 GN=DYNC1LI1	DYNC1LI1	56.652	26	13	21	13	0.961	1	1.018	0.967	0.986	0.92	1.073	1.092	1.063	0.964	0.24562	1.084	0.012758	1.124	0.006122
A0A287AIX1	PML-RARA regulated adaptor molecule 1 OS=Sus scrofa OX=9823 GN=PRAM1	PRAM1	76.717	16.9	9	10	9	0.953	0.967	0.905	1.03	0.972	1.013	1.074	1.018	1.107	1.067	0.069501	1.132	0.0172995	1.061	0.120518
A0A287AIZ2	COMM domain-containing protein 6 OS=Sus scrofa OX=9823 GN=COMMD6	COMMD6	130.28	2.6	3	5	1
A0A287AIZ9	Actin binding LIM protein 1 OS=Sus scrofa OX=9823 GN=ABLIM1	ABLIM1	78.911	11.5	7	7	7	1.016	1.083	1.021	0.909	0.987	0.968	0.983	1.093	0.989	0.918	0.056219	0.982	0.66716	1.07	0.188121
A0A287AJ27	CD276 molecule OS=Sus scrofa OX=9823 GN=CD276	CD276	56.425	16.3	3	5	3	0.999	1.029	1.058	0.93	1.077	1.083	0.899	1.018	0.921	1.001	0.98752	0.92	0.110041	0.918	0.25114
A0A287AJ48	Protein phosphatase, Mg2+/Mn2+ dependent 1A OS=Sus scrofa OX=9823 GN=PPM1A	PPM1A	42.445	23.3	7	9	6	1.018	0.985	0.976	1.044	0.966	1.036	0.978	1.044	0.992	1.022	0.47702	1.012	0.6529	0.989	0.76022
A0A287AJ52	Serine hydrolase like 2 OS=Sus scrofa OX=9823 GN=SERHL2	SERHL2	34.365	2.6	1	3	1
A0A287AJ59	Signal recognition particle 9 kDa protein OS=Sus scrofa OX=9823 GN=SRP9	SRP9	10.072	53.5	5	6	5
A0A287AJ68	Ankyrin repeat and SAM domain-containing protein 1A OS=Sus scrofa OX=9823 GN=ANKS1A	ANKS1A	122.92	12.9	12	12	12	0.962	0.95	1.024	1.027	0.967	0.972	1.046	1.066	1.042	1.01	0.74904	1.074	0.040941	1.063	0.039462
A0A287AJ70	BCL2 interacting protein 3 like OS=Sus scrofa OX=9823 GN=BNIP3L	BNIP3L	19.572	5	1	1	1
A0A287AJ93	Uncharacterized protein OS=Sus scrofa OX=9823 GN=PSMG4	PSMG4	13.766	20.3	1	1	1	1.024	1.035	0.989	0.9	0.792	1.124	0.975	1.304	0.892	0.924	0.4769	1.04	0.84126	1.126	0.49288
A0A287AJ95	Exportin 4 OS=Sus scrofa OX=9823 GN=XPO4	XPO4	106.6	6	6	6	6	1.094	1.044	1.003	0.944	0.925	0.968	1.003	0.9	0.96	0.903	0.023222	0.911	0.081922	1.009	0.8195
A0A287AJA1	Eukaryotic translation initiation factor 2 alpha kinase 4 OS=Sus scrofa OX=9823 GN=EIF2AK4	EIF2AK4	156.75	1.9	3	3	3
A0A287AJA7	Elongation of very long chain fatty acids protein 1 OS=Sus scrofa OX=9823 GN=ELOVL1	ELOVL1	32.46	4.3	1	1	1	0.75	0.726	0.827	1.136	1.147	1.196	1.085	1.072	1.074	1.511	0.00060331	1.403	0.0131014	0.929	0.0104965
A0A287AJB4	U2 small nuclear RNA auxiliary factor 1 like 5 OS=Sus scrofa OX=9823 GN=U2AF1L5	U2AF1L5	27.815	29.3	7	15	7	1.042	1.054	1.071	0.98	1.052	0.954	0.957	0.964	1.005	0.943	0.119781	0.924	0.0099398	0.98	0.58212
A0A287AJC7	Microfibril associated protein 1 OS=Sus scrofa OX=9823 GN=MFAP1	MFAP1	51.972	4.8	2	3	2	0.952	0.948	1.145	0.993	1.046	0.984	0.938	0.935	1.065	0.993	0.9578	0.965	0.67888	0.972	0.557
A0A287AJD2	Dual specificity protein phosphatase OS=Sus scrofa OX=9823 GN=DUSP6	DUSP6	42.303	3.9	1	1	1	0.603	0.783	0.954	0.865	1.004	0.748	1.349	1.309	1.385	1.118	0.48216	1.728	0.051979	1.545	0.0069433
A0A287AJE3	Uncharacterized protein OS=Sus scrofa OX=9823 GN=LOC106504547	LOC106504547	43.582	24.2	11	28	6	0.732	0.754	0.759	0.75	0.79	0.785	1.491	1.479	1.42	1.036	0.15292	1.955	1.8291e-06	1.888	4.4795e-06
A0A287AJE4	Uncharacterized protein OS=Sus scrofa OX=9823 GN=LOC100511905	LOC100511905	34.227	19	6	7	6	0.986	0.951	0.932	1.035	0.941	0.939	1.076	1.072	1.118	1.016	0.69636	1.138	0.0036447	1.12	0.030143
A0A287AJG6	WD repeat domain 36 OS=Sus scrofa OX=9823 GN=WDR36	WDR36	91.305	4.3	3	3	3	1.057	1.044	0.921	1.141	1.015	1.024	0.899	0.913	1.006	1.052	0.42442	0.932	0.28644	0.886	0.079163
A0A287AJI4	Serpin family F member 2 OS=Sus scrofa OX=9823 GN=SERPINF2	SERPINF2	53.221	11.4	5	5	5	1.02	0.965	1.068	0.963	0.999	0.938	1.016	1.067	1.127	0.95	0.2147	1.051	0.29788	1.107	0.045058
A0A287AJJ8	Versican core protein precursor OS=Sus scrofa OX=9823 GN=VCAN	VCAN	37.761	7	2	2	2
A0A287AJK6	28S ribosomal protein S35, mitochondrial OS=Sus scrofa OX=9823 GN=MRPS35	MRPS35	37.416	5.7	2	2	2
A0A287AJK9	Mitogen-activated protein kinase OS=Sus scrofa OX=9823 GN=MAPK3	MAPK3	38.547	22.6	7	10	5	0.992	0.988	1.021	0.992	0.952	1.015	0.979	1.09	1.066	0.986	0.53976	1.045	0.2811	1.059	0.2048
A0A287AJL0	USO1 vesicle transport factor OS=Sus scrofa OX=9823 GN=USO1	USO1	104.01	23.1	19	31	19	1.057	0.955	0.972	0.981	0.981	1.001	1.032	1.003	1.05	0.993	0.85774	1.034	0.37306	1.041	0.054658
A0A287AJL6	cAMP responsive element binding protein 1 OS=Sus scrofa OX=9823 GN=CREB1	CREB1	30.151	10.8	3	4	3	1.006	0.991	1.032	0.952	1.017	1.003	0.995	1.001	1.003	0.981	0.45548	0.99	0.46174	1.009	0.68696
A0A287AJM3	Mitochondrial ribosomal protein L39 OS=Sus scrofa OX=9823 GN=MRPL39	MRPL39	34.207	12.9	4	4	4
A0A287AJM6	Protein geranylgeranyltransferase type I subunit beta OS=Sus scrofa OX=9823 GN=PGGT1B	PGGT1B	42.379	13.5	4	4	4	1.022	0.923	0.942	0.955	1.069	1.117	0.973	1.028	0.991	1.088	0.2124	1.036	0.35752	0.953	0.39782
A0A287AJN3	Uncharacterized protein OS=Sus scrofa OX=9823 GN=C17H20orf27	C17H20orf27	19.374	8	1	1	1	1.071	1.167	0.939	0.845	1.181	0.993	0.987	0.837	0.984	0.95	0.65094	0.884	0.2162	0.93	0.58382
A0A287AJQ2	Phosphoglycerate mutase OS=Sus scrofa OX=9823 GN=PGAM1	PGAM1	28.804	52.4	14	48	14	1.026	1.007	1.035	1.005	0.992	0.981	1.005	1.027	1.026	0.971	0.049598	0.997	0.77728	1.027	0.055863
A0A287AJS6	Far upstream element-binding protein 3 OS=Sus scrofa OX=9823 GN=FUBP3	FUBP3	68.275	22.8	13	14	10	1.025	1.027	1.014	1.026	0.988	0.924	1.008	1.036	1.024	0.958	0.2937	1.001	0.94892	1.044	0.23512
A0A287AJT7	Uncharacterized protein OS=Sus scrofa OX=9823 GN=RPL28	RPL28	15.73	49.6	8	28	8	0.97	1	1	0.991	1.013	0.983	1.007	0.996	1.016	1.006	0.69424	1.016	0.23178	1.011	0.37226
A0A287AJU1	Coactosin like F-actin binding protein 1 OS=Sus scrofa OX=9823 GN=COTL1	COTL1	15.983	69	11	46	11	0.938	0.951	0.965	1.017	1.027	1.021	1.041	1.04	1.028	1.074	0.00118388	1.089	0.00072065	1.014	0.044815
A0A287AJV7	BSD domain containing 1 OS=Sus scrofa OX=9823 GN=BSDC1	BSDC1	47.172	7	3	3	3	0.879	0.917	0.952	1.053	0.979	0.9	1.108	0.99	1.229	1.067	0.28146	1.211	0.047724	1.135	0.181883
A0A287AJW9	Hydrogen voltage gated channel 1 OS=Sus scrofa OX=9823 GN=HVCN1	HVCN1	29.594	5.2	1	1	1	1.178	0.945	0.823	1.072	1.028	1.094	0.954	0.933	1.005	1.084	0.43674	0.982	0.94408	0.905	0.025536
A0A287AJX6	ArfGAP with FG repeats 1 OS=Sus scrofa OX=9823 GN=AGFG1	AGFG1	52.692	23.8	9	9	9	1.049	0.955	0.944	0.965	0.951	0.996	0.984	1.024	0.982	0.988	0.76882	1.014	0.69724	1.027	0.24242
A0A287AJY2	T-complex protein 1 subunit alpha OS=Sus scrofa OX=9823 GN=TCP1	TCP1	58.021	40.1	19	43	1
A0A287AJY4	NCK associated protein 1 OS=Sus scrofa OX=9823 GN=NCKAP1	NCKAP1	129.56	18.2	20	28	19	1.01	0.97	1.017	1.01	0.987	0.987	1.037	0.992	1.012	0.996	0.81356	1.015	0.496	1.019	0.27664
A0A287AJY8	Ubiquitin-like modifier-activating enzyme ATG7 OS=Sus scrofa OX=9823 GN=ATG7	ATG7	73.207	5.9	3	4	3
A0A287AJY9	Uncharacterized protein OS=Sus scrofa OX=9823	---	24.584	3.7	1	1	1
A0A287AK38	Alpha hemoglobin stabilizing protein OS=Sus scrofa OX=9823 GN=AHSP	AHSP	10.716	26.1	2	4	2	0.836	0.973	0.925	0.951	0.94	1.036	1.068	1.104	1.046	1.071	0.27004	1.177	0.025296	1.099	0.050257
A0A287AK42	Phosducin like 3 OS=Sus scrofa OX=9823 GN=PDCL3	PDCL3	27.453	22.9	5	6	5	0.987	0.976	1.008	1.011	1.017	0.977	1.006	1.03	0.995	1.011	0.5105	1.02	0.22418	1.009	0.6197
A0A287AK65	Argininosuccinate synthase 1 OS=Sus scrofa OX=9823 GN=ASS1	ASS1	42.43	12.5	5	5	5	1.043	1.035	1.063	0.906	0.957	0.876	1.006	1.047	1.015	0.872	0.006978	0.977	0.178344	1.12	0.0161008
A0A287AK92	HAUS augmin like complex subunit 8 OS=Sus scrofa OX=9823 GN=HAUS8	HAUS8	41.222	2.4	1	1	1
A0A287AKA2	Aminoacyl tRNA synthase complex-interacting multifunctional protein 1 OS=Sus scrofa OX=9823 GN=AIMP1	AIMP1	34.324	36.7	10	20	10	1.02	1.022	1.02	1.006	1.005	1.039	0.974	0.966	0.95	0.996	0.74716	0.944	0.0158241	0.948	0.0149975
A0A287AKB1	Trimethyllysine hydroxylase, epsilon OS=Sus scrofa OX=9823 GN=TMLHE	TMLHE	41.491	6.8	2	2	2
A0A287AKG6	RAB4A, member RAS oncogene family OS=Sus scrofa OX=9823 GN=RAB4A	RAB4A	24.362	22	4	6	2	1.132	1.136	1.041	1.111	1.018	0.924	0.825	0.932	0.902	0.923	0.24352	0.804	0.0090631	0.871	0.101501
A0A287AKH9	Uveal autoantigen with coiled-coil domains and ankyrin repeats OS=Sus scrofa OX=9823 GN=UACA	UACA	131.1	1.5	2	5	2	1.007	0.937	0.986	0.997	0.984	0.976	1.051	1.049	1.059	1.009	0.68892	1.078	0.072545	1.068	0.00064135
A0A287AKI9	Lysine--tRNA ligase OS=Sus scrofa OX=9823 GN=KARS	KARS	67.847	27	18	31	18	0.972	0.971	0.976	1.044	0.98	1.051	1.021	0.982	1.007	1.053	0.147281	1.031	0.117282	0.979	0.44868
A0A287AKM3	BCS1-like OS=Sus scrofa OX=9823 GN=BCS1L	BCS1L	47.441	2.1	1	3	1	0.97	1.142	1.039	0.925	0.895	0.941	1.002	1.08	1.022	0.876	0.058463	0.985	0.81222	1.124	0.0121154
A0A287AKM5	A-kinase anchor protein 10, mitochondrial OS=Sus scrofa OX=9823 GN=AKAP10	AKAP10	61.224	6	3	3	3	1.058	1.089	0.94	1.003	0.962	0.921	1.104	0.957	0.98	0.935	0.2681	0.985	0.82382	1.054	0.37102
A0A287AKP0	MIA family member 3, ER export factor OS=Sus scrofa OX=9823 GN=MIA3	MIA3	197.58	15	24	30	2	0.848	0.908	1.02	0.919	1.06	0.992	1.077	1.075	1.107	1.07	0.3661	1.174	0.04064	1.097	0.090163
A0A287AKP6	E3 UFM1-protein ligase 1 OS=Sus scrofa OX=9823 GN=UFL1	UFL1	86.365	14.6	10	11	10	0.948	1.015	1.019	0.953	0.966	1	0.989	1.025	1.011	0.979	0.48708	1.014	0.59602	1.036	0.113623
A0A287AKP7	Ribosomal protein S6 kinase OS=Sus scrofa OX=9823 GN=RPS6KA4	RPS6KA4	82.837	4.8	3	4	3
A0A287AKQ4	Regulator of chromosome condensation 1 OS=Sus scrofa OX=9823 GN=RCC1	RCC1	39.362	5.2	1	1	1	1.32	1.154	1.087	1.001	0.902	0.952	0.911	0.962	0.742	0.802	0.028004	0.734	0.033263	0.916	0.33322
A0A287AKQ5	LSM4 homolog, U6 small nuclear RNA and mRNA degradation associated OS=Sus scrofa OX=9823 GN=LSM4	LSM4	15.35	20.9	3	4	3	1.029	1.018	0.932	1.032	0.991	1.024	0.922	0.984	1.01	1.023	0.52626	0.979	0.63708	0.957	0.2097
A0A287AKQ6	Regulatory factor X5 OS=Sus scrofa OX=9823 GN=RFX5	RFX5	54.185	15.9	6	7	6	1.028	1.091	1.01	0.944	0.88	1.011	0.992	1.043	1.065	0.906	0.097862	0.991	0.78424	1.093	0.116138
A0A287AKR8	Uncharacterized protein OS=Sus scrofa OX=9823 GN=LAGE3	LAGE3	13.588	8.4	1	2	1	1.346	1.039	0.908	1.028	1.198	1.312	0.815	0.725	0.658	1.074	0.58572	0.667	0.039505	0.621	0.0073031
A0A287AKR9	Nucleolar GTP-binding protein 2 OS=Sus scrofa OX=9823 GN=GNL2	GNL2	83.155	4.1	3	4	3	0.87	0.899	0.927	1.134	1.093	0.916	1.215	0.926	1.024	1.166	0.094122	1.174	0.130682	1.007	0.96452
A0A287AKS4	Alpha kinase 3 OS=Sus scrofa OX=9823 GN=ALPK3	ALPK3	130.58	2.7	2	2	2	1.154	1.099	1.086	1.024	0.871	0.89	1.015	0.928	0.951	0.834	0.027279	0.867	0.011658	1.039	0.52112
A0A287AKU9	DCC-interacting protein 13-alpha OS=Sus scrofa OX=9823 GN=APPL1	APPL1	73.373	24.3	13	17	11	0.958	0.971	1.052	1.056	1.035	1.01	0.981	1.016	0.992	1.04	0.27684	1.003	0.9171	0.964	0.090225
A0A287AKW6	MINDY lysine 48 deubiquitinase 3 OS=Sus scrofa OX=9823 GN=MINDY3	MINDY3	43.407	3.9	1	1	1
A0A287AKW8	Eukaryotic translation initiation factor 2B subunit delta OS=Sus scrofa OX=9823 GN=EIF2B4	EIF2B4	59.108	16.4	7	9	1
A0A287AKX0	PAN2-PAN3 deadenylation complex subunit PAN3 OS=Sus scrofa OX=9823 GN=PAN3	PAN3	93.708	4.4	2	2	2
A0A287AKY6	Uncharacterized protein OS=Sus scrofa OX=9823 GN=RAD50	RAD50	147.19	18.7	26	31	26	0.973	1.076	1.056	0.987	0.917	0.945	1.034	0.983	0.956	0.918	0.084944	0.957	0.32622	1.044	0.24642
A0A287AKZ4	SRSF protein kinase 2 OS=Sus scrofa OX=9823 GN=SRPK2	SRPK2	66.718	7.7	4	5	2	1.012	0.835	1.071	0.87	1.147	0.996	1.066	1.029	0.987	1.033	0.7901	1.056	0.48928	1.023	0.74806
A0A287AKZ5	Eukaryotic translation initiation factor 1A, X-chromosomal OS=Sus scrofa OX=9823 GN=EIF1AX	EIF1AX	16.474	34.7	5	21	5	1.048	1.021	1.033	1.004	0.992	1.001	0.992	0.979	0.959	0.966	0.01474	0.945	0.0100201	0.978	0.096477
A0A287AL05	Eukaryotic translation initiation factor 3 subunit L OS=Sus scrofa OX=9823 GN=EIF3L	EIF3L	74.008	24.2	15	22	1
A0A287AL18	Uncharacterized protein OS=Sus scrofa OX=9823 GN=TERF2IP	TERF2IP	39.517	7.8	2	3	2	0.734	0.939	1.185	1.232	1.019	0.993	1.026	0.896	0.967	1.135	0.41208	1.011	0.8538	0.891	0.22434
A0A287AL38	Tripeptidyl peptidase 2 OS=Sus scrofa OX=9823 GN=TPP2	TPP2	140.7	24	28	37	0
A0A287AL47	Zinc metallopeptidase STE24 OS=Sus scrofa OX=9823 GN=ZMPSTE24	ZMPSTE24	48.897	10.4	4	4	4	1.303	0.952	0.951	1.048	1.008	0.865	0.962	1.002	0.948	0.911	0.51736	0.908	0.50654	0.997	0.99988
A0A287AL55	Alpha-1,4 glucan phosphorylase OS=Sus scrofa OX=9823 GN=PYGB	PYGB	96.272	31.4	28	47	20	1.034	1.002	1.008	0.973	0.98	0.991	0.988	0.97	0.968	0.967	0.038921	0.961	0.027376	0.994	0.50526
A0A287AL81	Olfactory receptor OS=Sus scrofa OX=9823	---	33.426	3	1	1	1
A0A287AL85	GA binding protein transcription factor alpha subunit OS=Sus scrofa OX=9823 GN=GABPA	GABPA	49.176	14.7	6	9	6	0.945	1.025	0.947	0.985	1.07	1.001	0.965	1.014	1.028	1.048	0.27432	1.031	0.40332	0.984	0.64358
A0A287ALA0	Uncharacterized protein OS=Sus scrofa OX=9823 GN=BASP1	BASP1	23.087	68.9	11	21	11	0.962	1.022	1.001	1.041	0.962	0.954	1.035	1.002	0.965	0.991	0.77924	1.006	0.84578	1.015	0.67602
A0A287ALB2	SWI/SNF related, matrix associated, actin dependent regulator of chromatin subfamily c member 2 OS=Sus scrofa OX=9823 GN=SMARCC2	SMARCC2	118.73	24.4	21	37	15	1.018	0.991	1.033	0.961	1.029	0.935	0.989	0.968	1.056	0.962	0.26718	0.99	0.74348	1.03	0.48446
A0A287ALC1	Uncharacterized protein OS=Sus scrofa OX=9823	---	65.062	23	9	19	0
A0A287ALG2	Lambda-crystallin homolog OS=Sus scrofa OX=9823 GN=CRYL1	CRYL1	29.199	25.4	5	8	5	1.026	0.928	1.081	1.058	1.01	0.999	1.018	0.929	0.94	1.011	0.81282	0.951	0.41062	0.941	0.144424
A0A287ALH0	Strawberry notch homolog 1 OS=Sus scrofa OX=9823 GN=SBNO1	SBNO1	150.58	5.4	5	6	5	0.92	1.306	0.794	1.13	0.968	0.902	1.073	0.79	1.116	0.993	0.9481	0.986	0.98852	0.993	0.91796
A0A287ALH9	Mitogen-activated protein kinase kinase 3 OS=Sus scrofa OX=9823 GN=MAP2K3	MAP2K3	42.126	23.2	8	11	4	1.012	0.984	0.955	0.999	0.98	1.034	1.02	1.009	1.084	1.021	0.41536	1.055	0.129037	1.033	0.30068
A0A287ALI7	Core histone macro-H2A OS=Sus scrofa OX=9823 GN=H2AFY	H2AFY	39.101	14.7	5	6	5	0.909	0.849	1.091	1.037	1.014	0.998	1.045	1.026	1.042	1.07	0.43434	1.093	0.33602	1.021	0.170257
A0A287ALJ0	PWP1 homolog, endonuclein OS=Sus scrofa OX=9823 GN=PWP1	PWP1	54.842	2	1	1	1
A0A287ALN2	Macrophage erythroblast attacher OS=Sus scrofa OX=9823 GN=MAEA	MAEA	45.329	3.3	1	1	1	0.905	1.012	0.927	0.953	0.983	1.012	1.131	0.926	1.154	1.037	0.38944	1.129	0.20592	1.089	0.326
A0A287ALN3	Uncharacterized protein OS=Sus scrofa OX=9823 GN=MIEF1	MIEF1	51.045	2.2	1	1	1	0.985	0.951	0.928	0.981	1.127	1.056	1.012	1.022	0.954	1.105	0.087423	1.043	0.20072	0.944	0.285
A0A287ALP1	Ribonuclease T2 OS=Sus scrofa OX=9823 GN=RNASET2	RNASET2	24.494	26.9	5	9	5	0.963	1.015	0.921	1.001	0.953	0.988	1.027	1.079	1.033	1.015	0.65458	1.083	0.067245	1.067	0.038983
A0A287ALP5	Protein transport protein Sec24A OS=Sus scrofa OX=9823 GN=SEC24A	SEC24A	116.65	8.9	8	9	7	0.956	0.904	1.016	1.034	0.983	1.025	1.053	1.041	0.982	1.058	0.199803	1.07	0.165299	1.011	0.70376
A0A287ALQ1	Nucleoporin 210 OS=Sus scrofa OX=9823 GN=NUP210	NUP210	208.16	11.3	17	24	17	0.977	1.016	1.019	1.038	1.036	1.013	0.93	0.896	0.986	1.025	0.189624	0.934	0.08894	0.911	0.031396
A0A287ALU4	RNA binding motif single stranded interacting protein 3 OS=Sus scrofa OX=9823 GN=RBMS3	RBMS3	42.926	6.4	2	2	2
A0A287ALU7	Uncharacterized protein OS=Sus scrofa OX=9823	---	15.568	8	1	2	1
A0A287ALW9	NSE2/MMS21 homolog, SMC5-SMC6 complex SUMO ligase OS=Sus scrofa OX=9823 GN=NSMCE2	NSMCE2	27.933	7.3	1	1	1
A0A287ALX4	Y+L amino acid transporter 1 OS=Sus scrofa OX=9823 GN=SLC7A7	SLC7A7	52.491	2.5	1	1	1
A0A287AM26	Arginyl aminopeptidase OS=Sus scrofa OX=9823 GN=RNPEP	RNPEP	72.139	33	22	51	22	0.987	0.958	0.981	1.036	1.016	1.065	1.001	0.969	0.971	1.065	0.0183635	1.005	0.73292	0.944	0.028098
A0A287AM49	A-kinase anchoring protein 7 OS=Sus scrofa OX=9823 GN=AKAP7	AKAP7	9.0588	44.4	3	4	1	0.982	0.99	1.116	0.95	1.007	1.025	1	0.949	0.991	0.966	0.51524	0.952	0.34366	0.986	0.64594
A0A287AM51	Monocarboxylate transporter 1 OS=Sus scrofa OX=9823 GN=SLC16A1	SLC16A1	54.247	9.6	5	9	5	0.96	1.045	0.959	0.976	0.924	0.955	0.964	1.123	1.071	0.963	0.32094	1.065	0.30834	1.106	0.107036
A0A287AM78	Purine nucleoside phosphorylase OS=Sus scrofa OX=9823 GN=PNP	PNP	32.042	30.2	7	12	7	0.958	1.355	0.921	0.922	0.96	0.999	0.939	0.78	1.028	0.891	0.46572	0.849	0.35398	0.953	0.5604
A0A287AM87	Translocase of inner mitochondrial membrane 50 OS=Sus scrofa OX=9823 GN=TIMM50	TIMM50	39.42	16.1	5	5	5	1.038	1.004	0.993	1.045	0.937	0.998	0.91	0.99	0.986	0.982	0.6073	0.951	0.170422	0.968	0.48978
A0A287AM91	Unc-13 homolog D OS=Sus scrofa OX=9823 GN=UNC13D	UNC13D	119.43	9.9	9	13	9	1.055	0.918	0.906	1.05	1.08	0.937	0.96	1.087	1.002	1.065	0.38352	1.059	0.39108	0.994	0.9292
A0A287AMA9	DEAD-box helicase 42 OS=Sus scrofa OX=9823 GN=DDX42	DDX42	86.934	14.1	9	14	9	1.063	1.059	1.046	1.046	0.913	0.999	0.9	1.001	0.893	0.934	0.22338	0.882	0.075957	0.945	0.35456
A0A287AMB7	Signaling threshold regulating transmembrane adaptor 1 OS=Sus scrofa OX=9823 GN=SIT1	SIT1	22.889	9	1	1	1
A0A287AME4	Ribosomal protein L37a OS=Sus scrofa OX=9823 GN=RPL37A	RPL37A	10.275	41.3	3	4	3	1.09	1.112	1.16	1.001	1.019	1.04	0.843	0.88	0.866	0.91	0.0118231	0.77	0.00030004	0.846	0.00056
A0A287AMJ3	Uncharacterized protein OS=Sus scrofa OX=9823	---	18.044	24.2	4	9	1	1.026	1.051	1.104	1.088	0.99	1.019	0.931	0.87	0.93	0.974	0.48556	0.859	0.0080164	0.882	0.024798
A0A287AMK0	Serum albumin OS=Sus scrofa OX=9823 GN=ALB	ALB	67.168	74.1	56	308	3	1.168	1.211	1.172	0.861	0.829	0.833	0.97	0.922	0.972	0.711	3.6308e-05	0.807	0.00048466	1.135	0.0037987
A0A287AML4	Uncharacterized protein OS=Sus scrofa OX=9823 GN=UBA2	UBA2	41.217	21.8	5	9	5	0.983	1.015	1.009	0.994	0.957	0.998	1.029	1.024	0.989	0.981	0.30392	1.012	0.50896	1.032	0.164542
A0A287AMM5	RAB, member RAS oncogene family like 6 OS=Sus scrofa OX=9823 GN=RABL6	RABL6	62.082	14.8	6	8	6	0.955	1.002	1.024	1.05	0.928	0.929	1.013	1.023	1.062	0.975	0.59562	1.039	0.198384	1.066	0.20822
A0A287AMM6	MICOS complex subunit MIC60 OS=Sus scrofa OX=9823 GN=IMMT	IMMT	82.67	42.9	32	48	32	1.022	1.021	1.009	1.019	1.005	1.029	0.984	1.001	0.979	1	0.97206	0.971	0.020541	0.971	0.036804
A0A287AMN2	NADH:ubiquinone oxidoreductase subunit S4 OS=Sus scrofa OX=9823 GN=NDUFS4	NDUFS4	19.717	25.7	4	7	4	0.994	0.938	1.042	1.044	0.901	1.032	1.048	1.041	0.978	1.001	0.9964	1.031	0.45216	1.03	0.57848
A0A287AMP3	Creatine kinase M-type OS=Sus scrofa OX=9823 GN=CKM	CKM	40.447	14.3	5	9	4	1.129	1.014	0.924	0.895	1.161	0.833	0.945	1.027	1.092	0.942	0.59616	0.999	0.99338	1.061	0.57006
A0A287AMS8	Pre-mRNA processing factor 31 OS=Sus scrofa OX=9823 GN=PRPF31	PRPF31	55.321	12.6	5	6	5	0.934	0.972	1.086	1.016	0.955	1.054	0.985	0.981	0.902	1.011	0.83082	0.959	0.485	0.948	0.25998
A0A287AMT7	HECT and RLD domain containing E3 ubiquitin protein ligase family member 6 OS=Sus scrofa OX=9823 GN=HERC6	HERC6	114.41	9.2	8	11	8	0.936	0.961	0.945	1.02	1.113	0.982	0.972	1.03	0.987	1.096	0.075377	1.052	0.057278	0.96	0.3815
A0A287AMU3	Uncharacterized protein OS=Sus scrofa OX=9823	---	26.015	44.5	8	15	6	0.987	0.972	0.942	1.017	1.012	1.045	1.029	1.02	1.019	1.06	0.02684	1.058	0.0162973	0.998	0.86712
A0A287AMU6	Pancreatic trypsin inhibitor-like isoform 2 precursor OS=Sus scrofa OX=9823 GN=LOC100158011	LOC100158011	11.815	58.1	4	6	4	0.787	0.902	0.926	1.106	1.044	1.067	1.079	1.016	1.078	1.23	0.0169576	1.213	0.022603	0.986	0.62242
A0A287AMV5	Polyribonucleotide nucleotidyltransferase 1, mitochondrial OS=Sus scrofa OX=9823 GN=PNPT1	PNPT1	86.01	8.5	6	6	6	1.042	1.025	0.991	1.006	1.038	1.012	0.982	0.969	0.985	0.999	0.97748	0.96	0.060237	0.961	0.021022
A0A287AMW3	Serine/threonine kinase 3 OS=Sus scrofa OX=9823 GN=STK3	STK3	55.51	17.9	7	11	4	1.016	0.955	0.939	1.121	1.003	1.021	1.034	1.002	0.929	1.081	0.140523	1.019	0.66954	0.943	0.27866
A0A287AMX6	Atlastin GTPase 2 OS=Sus scrofa OX=9823 GN=ATL2	ATL2	62.522	7.6	3	4	3	1.085	0.958	1.053	1.062	0.969	0.962	1.007	1.141	0.918	0.967	0.5337	0.99	0.87462	1.024	0.77956
A0A287AMX7	Kin17 DNA and RNA binding protein OS=Sus scrofa OX=9823 GN=KIN	KIN	45.184	5.4	2	2	2
A0A287AMY3	Myotubularin related protein 10 OS=Sus scrofa OX=9823 GN=MTMR10	MTMR10	75.1	3.7	2	2	2
A0A287AMY4	Uncharacterized protein OS=Sus scrofa OX=9823	---	41.646	2.4	1	1	1
A0A287AMZ2	T-complex protein 1 subunit gamma OS=Sus scrofa OX=9823 GN=CCT3	CCT3	60.653	55.2	28	76	28	0.989	0.98	0.991	1.003	1.002	0.982	1.006	1.039	1.005	1.009	0.30534	1.03	0.059717	1.021	0.182724
A0A287AMZ5	Membrane cofactor protein OS=Sus scrofa OX=9823 GN=CD46	CD46	40.399	3.8	2	7	2	1.041	1.016	1.008	0.999	1.132	0.995	1.04	0.95	0.83	1.02	0.70014	0.92	0.31754	0.902	0.24788
A0A287AN12	Non-histone chromosomal protein HMG-17 OS=Sus scrofa OX=9823 GN=HMGN2	HMGN2	7.5873	45.2	4	13	4	1.313	1.324	1.312	0.978	0.95	0.913	0.758	0.733	0.762	0.719	0.0037164	0.571	7.3449e-07	0.793	0.00057957
A0A287AN25	Splicing factor 3a subunit 2 OS=Sus scrofa OX=9823 GN=SF3A2	SF3A2	49.329	5.2	2	5	2	0.934	1.088	0.942	1.041	0.896	0.955	1.002	1.026	1.004	0.976	0.73412	1.023	0.66584	1.048	0.328
A0A287AN27	Death associated protein kinase 3 OS=Sus scrofa OX=9823 GN=DAPK3	DAPK3	52.701	4.6	2	2	2	1.139	1.014	0.96	0.986	1.027	0.958	0.841	1.041	1.063	0.954	0.45818	0.946	0.55296	0.991	0.86696
A0A287AN38	SNF related kinase OS=Sus scrofa OX=9823 GN=SNRK	SNRK	82.586	3.1	2	2	2
A0A287AN39	Double PHD fingers 2 OS=Sus scrofa OX=9823 GN=DPF2	DPF2	38.892	17.7	6	8	6	1.062	1.124	1.029	0.955	0.999	0.957	0.936	0.918	0.982	0.905	0.029164	0.882	0.0186374	0.974	0.34944
A0A287AN48	Radixin OS=Sus scrofa OX=9823 GN=RDX	RDX	66.497	38.2	26	69	15	1.011	1.046	1.037	0.945	0.955	0.993	1.021	1.02	1.004	0.935	0.0209	0.984	0.24168	1.053	0.03264
A0A287AN76	Solute carrier family 25 member 11 OS=Sus scrofa OX=9823 GN=SLC25A11	SLC25A11	34.106	20.7	6	10	6	1.007	1.04	1.018	0.971	0.978	0.966	1.03	0.994	0.988	0.951	0.0077767	0.983	0.33692	1.033	0.072882
A0A287AN90	Matrix metalloproteinase-9 precursor OS=Sus scrofa OX=9823 GN=MMP9	MMP9	74.64	7.1	5	5	5	0.982	0.933	0.91	0.851	0.968	0.845	1.141	1.262	1.25	0.943	0.29134	1.293	0.0028152	1.371	0.0043994
A0A287AN91	SCY1 like pseudokinase 2 OS=Sus scrofa OX=9823 GN=SCYL2	SCYL2	84.115	4.5	3	4	3
A0A287AN95	PDZ and LIM domain 5 OS=Sus scrofa OX=9823 GN=PDLIM5	PDLIM5	63.477	41.5	21	59	20	0.977	0.974	0.937	1.012	0.986	0.983	1.06	0.994	1.066	1.032	0.123103	1.08	0.042297	1.047	0.136065
A0A287AN96	Non-specific serine/threonine protein kinase OS=Sus scrofa OX=9823 GN=AKT3	AKT3	52.451	11.1	4	4	1
A0A287AN98	Chromodomain helicase DNA binding protein 4 OS=Sus scrofa OX=9823 GN=CHD4	CHD4	211.89	15.1	25	37	21	0.986	0.977	0.971	1.012	0.991	1.024	0.977	1.011	1.005	1.032	0.042084	1.02	0.158604	0.989	0.47166
A0A287ANC8	cAMP-regulated phosphoprotein 19 OS=Sus scrofa OX=9823 GN=MYO5A	MYO5A	211.56	2.2	4	4	4
A0A287ANC9	Polyamine oxidase OS=Sus scrofa OX=9823 GN=PAOX	PAOX	50.124	11.9	4	4	4	1.19	0.954	1.014	1.073	1.082	1.058	0.835	0.921	0.901	1.017	0.77502	0.841	0.079324	0.827	0.0032964
A0A287ANE9	Serine/threonine kinase 38 OS=Sus scrofa OX=9823 GN=STK38	STK38	47.431	14.3	5	6	3	1.056	1.122	1.141	0.79	1.187	0.871	0.876	0.982	0.98	0.858	0.25006	0.855	0.024003	0.996	0.93846
A0A287ANF9	Prostaglandin-endoperoxide synthase 1 OS=Sus scrofa OX=9823 GN=PTGS1	PTGS1	68.948	20.3	9	21	9	1.003	1.05	0.942	1.021	0.952	1.001	1.031	1.023	0.988	0.993	0.87194	1.016	0.65572	1.023	0.40522
A0A287ANG0	Pogo transposable element derived with ZNF domain OS=Sus scrofa OX=9823 GN=POGZ	POGZ	150.36	5.8	6	6	6	1.062	0.969	1.032	1.004	1.051	0.99	0.955	0.961	1.069	0.994	0.87412	0.975	0.5927	0.98	0.63502
A0A287ANI6	3-hydroxymethyl-3-methylglutaryl-CoA lyase OS=Sus scrofa OX=9823 GN=HMGCL	HMGCL	36.674	17	6	8	6	1.04	1.021	1.09	0.989	1.02	0.991	1.005	0.946	0.91	0.952	0.089361	0.908	0.049597	0.954	0.190076
A0A287ANM0	Uncharacterized protein OS=Sus scrofa OX=9823 GN=CEP192	CEP192	39.642	31.9	8	12	8	0.937	0.926	0.885	0.968	1.063	0.924	0.81	0.95	1.082	1.075	0.186583	1.034	0.76822	0.962	0.66012
A0A287ANM8	Uncharacterized protein OS=Sus scrofa OX=9823 GN=C13H21orf33	C13H21orf33	28.826	42	11	21	11	0.956	0.986	1.035	0.993	0.973	0.995	1.005	0.985	0.959	0.995	0.8492	0.991	0.7513	0.996	0.79802
A0A287ANN7	Eukaryotic translation elongation factor 1 delta OS=Sus scrofa OX=9823 GN=EEF1D	EEF1D	31.032	51.1	12	36	11	1.013	0.99	0.981	1.02	1.003	1.018	0.965	1.012	0.99	1.019	0.157216	0.994	0.7459	0.976	0.167597
A0A287ANQ4	Alanyl-tRNA synthetase 2, mitochondrial OS=Sus scrofa OX=9823 GN=AARS2	AARS2	104.65	5.5	5	5	5	1.122	0.948	0.935	0.999	1.025	0.965	0.913	1.08	1.043	0.995	0.97368	1.01	0.8927	1.016	0.8175
A0A287ANT4	SPATS2-like protein OS=Sus scrofa OX=9823 GN=SPATS2L	SPATS2L	54.114	10.2	5	5	1
A0A287ANT5	SP110 nuclear body protein OS=Sus scrofa OX=9823 GN=SP110	SP110	63.121	7.7	3	4	3	0.605	1.341	1.148	1.211	0.984	0.985	1.189	1.012	0.504	1.028	0.77592	0.874	0.71052	0.851	0.46418
A0A287ANU3	BCL2 interacting protein 2 OS=Sus scrofa OX=9823 GN=BNIP2	BNIP2	41.282	2.2	1	1	1
A0A287ANU7	Ribonuclease P/MRP subunit p40 OS=Sus scrofa OX=9823 GN=RPP40	RPP40	36.358	8.4	3	3	3
A0A287ANX3	Uncharacterized protein OS=Sus scrofa OX=9823 GN=IFRD2	IFRD2	48.498	3.8	1	1	1	1.101	0.783	0.963	0.971	1.047	0.934	1.058	1.067	1.104	1.037	0.6908	1.134	0.30834	1.094	0.065299
A0A287ANZ8	Thy-1 membrane glycoprotein precursor OS=Sus scrofa OX=9823 GN=THY1	THY1	17.2	18.8	2	5	2	1.069	1.012	0.909	0.935	1.072	0.973	0.957	1.013	1.031	0.997	0.96688	1.004	0.923	1.007	0.8686
A0A287AP17	Suppressor of glucose, autophagy associated 1 OS=Sus scrofa OX=9823 GN=SOGA1	SOGA1	173.73	1.3	2	2	2
A0A287AP19	Eukaryotic translation initiation factor 4E type 2 OS=Sus scrofa OX=9823 GN=EIF4E2	EIF4E2	26.674	15.9	3	4	3	1.14	1.027	1.07	0.946	1.029	0.86	1.036	1.042	0.87	0.876	0.088923	0.911	0.2224	1.04	0.6516
A0A287AP63	U4/U6 small nuclear ribonucleoprotein Prp3 OS=Sus scrofa OX=9823 GN=PRPF3	PRPF3	77.528	22.1	12	15	12	1.043	1.007	1.016	0.996	0.988	1.036	0.958	0.96	0.975	0.985	0.44664	0.944	0.0082354	0.958	0.052455
A0A287AP65	Phosphoinositide phospholipase C OS=Sus scrofa OX=9823 GN=PLCB1	PLCB1	122.23	3.7	3	3	3	0.984	0.922	1.065	0.922	1.037	0.977	1.034	0.995	1.076	0.988	0.8443	1.045	0.39306	1.058	0.23728
A0A287AP66	Uncharacterized protein OS=Sus scrofa OX=9823 GN=RPL12	RPL12	17.818	30.9	4	14	3	0.916	1.008	1.033	0.981	0.96	1.054	1.041	0.914	0.956	1.013	0.78814	0.984	0.77998	0.972	0.57282
A0A287AP85	Clathrin interactor 1 OS=Sus scrofa OX=9823 GN=CLINT1	CLINT1	66.818	19.5	10	17	10	1.045	1.003	0.952	0.967	0.997	1.044	1.003	0.979	0.974	1.003	0.93808	0.985	0.64544	0.983	0.51788
A0A287AP88	TSC22 domain family protein 3 OS=Sus scrofa OX=9823 GN=TSC22D3	TSC22D3	22.309	14.5	3	5	2
A0A287APA1	Nipsnap homolog 2 OS=Sus scrofa OX=9823 GN=NIPSNAP2	NIPSNAP2	31.341	23.1	7	12	7	1.169	1.127	1.016	1.018	0.969	0.993	0.932	0.944	0.968	0.9	0.078818	0.859	0.025625	0.954	0.061324
A0A287APA2	Zinc finger protein 577 OS=Sus scrofa OX=9823 GN=ZNF577	ZNF577	53.716	2.3	1	1	1
A0A287APB5	DENN domain containing 1A OS=Sus scrofa OX=9823 GN=DENND1A	DENND1A	107.46	4.4	4	5	4	1.052	0.968	1.007	1.065	0.989	1.053	0.99	1.007	1.018	1.026	0.47616	0.996	0.8981	0.97	0.29208
A0A287APD5	Long-chain-fatty-acid--CoA ligase 3 OS=Sus scrofa OX=9823 GN=ACSL3	ACSL3	80.275	5.6	3	3	2	0.785	0.964	0.987	1.046	0.987	1.019	1.008	1.132	1.081	1.115	0.20078	1.177	0.105296	1.055	0.2319
A0A287APE0	Ribosomal RNA processing 1 OS=Sus scrofa OX=9823 GN=RRP1	RRP1	51.541	7.4	3	4	3	0.889	0.774	0.926	0.915	1.351	0.91	1.107	1.11	1.027	1.227	0.25194	1.253	0.0191002	1.021	0.788
A0A287APE3	Gse1 coiled-coil protein OS=Sus scrofa OX=9823 GN=GSE1	GSE1	127.21	2.4	3	3	3	1.004	1.15	1.226	1.12	1	0.819	1.153	0.764	0.756	0.87	0.25456	0.791	0.171196	0.909	0.55614
A0A287APG0	STE20 like kinase OS=Sus scrofa OX=9823 GN=SLK	SLK	142.69	16.2	20	23	19	1.089	1.063	1.092	0.976	0.971	0.935	1.008	0.99	1.023	0.888	0.00177973	0.931	0.0050592	1.048	0.046085
A0A287APG5	Uncharacterized protein OS=Sus scrofa OX=9823	---	31.446	3.5	1	1	1	0.492	0.504	0.508	1.869	1.043	2.309	0.839	0.761	0.7	3.471	0.03758	1.529	0.00136374	0.441	0.034058
A0A287APG9	Cytohesin-2 OS=Sus scrofa OX=9823 GN=CYTH2	CYTH2	46.561	7.2	2	2	1	1.035	0.899	0.973	0.962	1.103	1.01	1.028	0.996	1.011	1.058	0.38076	1.044	0.34528	0.987	0.79214
A0A287APH4	Retinoblastoma-associated protein OS=Sus scrofa OX=9823 GN=RB1	RB1	102.22	4.5	3	3	3
A0A287API3	Protein transport protein Sec23B OS=Sus scrofa OX=9823 GN=SEC23B	SEC23B	83.688	16.8	10	13	8	1.031	0.962	0.988	1.152	1.055	1.085	0.859	1.087	0.974	1.104	0.039483	0.98	0.74352	0.887	0.16408
A0A287APJ0	NudC domain containing 2 OS=Sus scrofa OX=9823 GN=NUDCD2	NUDCD2	17.646	24.8	3	4	3	1.001	1.01	0.953	0.971	1.064	0.976	1.041	0.951	1.044	1.016	0.68486	1.024	0.54648	1.008	0.8564
A0A287APJ3	BCL2 associated athanogene 3 OS=Sus scrofa OX=9823 GN=BAG3	BAG3	55.127	35.5	14	18	14	0.944	0.965	1.003	0.947	0.991	0.959	1.051	1.049	1.129	0.995	0.83248	1.109	0.02636	1.115	0.0175428
A0A287APJ6	3-ketodihydrosphingosine reductase OS=Sus scrofa OX=9823 GN=KDSR	KDSR	25.935	12.2	1	1	1
A0A287APK0	6-phosphogluconolactonase OS=Sus scrofa OX=9823 GN=PGLS	PGLS	23.495	43.7	8	17	8	1.053	1.046	1.066	0.994	1.015	0.965	0.983	0.951	0.963	0.94	0.0163419	0.915	0.00135573	0.974	0.2109
A0A287APL6	Lysocardiolipin acyltransferase 1 OS=Sus scrofa OX=9823 GN=LCLAT1	LCLAT1	37.372	10.1	3	3	3
A0A287APM6	IgG receptor FcRn large subunit p51 precursor OS=Sus scrofa OX=9823 GN=FCGRT	FCGRT	35.23	9.1	3	7	3	0.963	0.989	0.914	1.003	1.047	1.041	1.018	0.983	1.03	1.079	0.047121	1.058	0.106077	0.981	0.36998
A0A287APN3	B double prime 1, subunit of RNA polymerase III transcription initiation factor IIIB OS=Sus scrofa OX=9823 GN=BDP1	BDP1	233.01	0.5	1	1	1	1.005	1.068	1.067	0.869	0.92	0.88	1.025	1.101	1.08	0.85	0.0036026	1.021	0.51854	1.201	0.0026384
A0A287APP8	Protein arginine methyltransferase 9 OS=Sus scrofa OX=9823 GN=PRMT9	PRMT9	83.509	1.9	1	2	1	1.008	1.315	0.825	1.298	1.244	0.844	0.424	0.812	1.244	1.076	0.72222	0.788	0.41114	0.732	0.32182
A0A287APQ2	Amyloid beta precursor protein binding family B member 1 OS=Sus scrofa OX=9823 GN=APBB1	APBB1	76.952	3.1	2	2	1	0.61	0.493	1.414	1.144	0.357	1.171	1.327	1.293	1.202	1.062	0.94216	1.518	0.24478	1.43	0.34108
A0A287APR6	SH3 domain containing kinase binding protein 1 OS=Sus scrofa OX=9823 GN=SH3KBP1	SH3KBP1	73.046	25	13	19	13	0.968	1.024	1	1.031	1.014	1.015	0.927	0.988	0.965	1.023	0.25646	0.963	0.197097	0.941	0.034636
A0A287APV0	Serpin B10 OS=Sus scrofa OX=9823 GN=SERPINB10	SERPINB10	39.908	53.6	16	27	16	0.984	0.979	0.947	1.018	1.06	1.014	1.021	1.001	1.011	1.063	0.031056	1.042	0.035524	0.981	0.27964
A0A287APX2	GRIP and coiled-coil domain containing 1 OS=Sus scrofa OX=9823 GN=GCC1	GCC1	87.384	1.3	1	1	1	1.123	0.998	1.067	0.931	0.909	0.928	1.041	0.947	1.075	0.868	0.016037	0.961	0.47506	1.107	0.061601
A0A287APX6	RAP1B, member of RAS oncogene family OS=Sus scrofa OX=9823 GN=RAP1B	RAP1B	20.825	39.7	9	39	5	0.906	0.994	0.914	1.04	0.989	1.032	1.065	1.064	1.028	1.088	0.064239	1.122	0.021855	1.031	0.186981
A0A287APZ6	Ubiquitin conjugating enzyme E2 Q1 OS=Sus scrofa OX=9823 GN=UBE2Q1	UBE2Q1	24.277	14.3	3	3	2
A0A287APZ8	Superoxide dismutase OS=Sus scrofa OX=9823 GN=SOD2	SOD2	22.047	39.6	7	19	7	0.892	0.928	0.952	0.971	1.031	0.977	1.084	1.107	1.082	1.075	0.055144	1.181	0.00120336	1.099	0.0098201
A0A287AQ17	GIPC PDZ domain containing family member 1 OS=Sus scrofa OX=9823 GN=GIPC1	GIPC1	43.743	3.7	2	2	2	1.144	0.915	1.117	0.835	0.958	1.149	0.936	0.942	1.025	0.926	0.52872	0.914	0.32526	0.987	0.95656
A0A287AQ31	ERCC excision repair 3, TFIIH core complex helicase subunit OS=Sus scrofa OX=9823 GN=ERCC3	ERCC3	80.327	5.1	3	4	3	1.019	1.033	1.044	0.933	0.955	1.058	1.027	0.997	0.947	0.952	0.26268	0.96	0.166563	1.008	0.8458
A0A287AQ40	Uncharacterized protein OS=Sus scrofa OX=9823 GN=ZFP91	ZFP91	63.834	7.5	3	3	3	1.222	1.438	0.518	0.486	0.589	1.255	1.252	1.742	0.567	0.733	0.51016	1.121	0.83502	1.528	0.40332
A0A287AQ50	Splicing factor 3B subunit 5 OS=Sus scrofa OX=9823 GN=SF3B5	SF3B5	10.135	40.7	3	5	3	1.171	1.149	1.089	0.898	0.995	1.039	0.849	0.985	0.848	0.86	0.034758	0.787	0.0111815	0.915	0.24474
A0A287AQ73	Capicua transcriptional repressor OS=Sus scrofa OX=9823 GN=CIC	CIC	130.86	0.9	1	1	1	1.109	0.955	1.129	0.991	0.894	0.929	0.933	1.035	1.048	0.881	0.110764	0.945	0.43792	1.072	0.22094
A0A287AQ77	Methionine sulfoxide reductase A OS=Sus scrofa OX=9823 GN=MSRA	MSRA	21.577	29.2	3	3	3
A0A287AQ80	Propionyl-CoA carboxylase alpha subunit OS=Sus scrofa OX=9823 GN=PCCA	PCCA	75.148	12.2	8	12	8	1.058	1.049	1.088	1.009	1.043	0.935	0.915	0.953	0.892	0.935	0.116643	0.864	0.0027211	0.924	0.105899
A0A287AQ96	ADP ribosylation factor GTPase activating protein 1 OS=Sus scrofa OX=9823 GN=ARFGAP1	ARFGAP1	44.941	15.9	5	6	5	0.936	0.954	0.971	1.005	1.058	1.041	0.981	1.009	1.057	1.085	0.0117017	1.065	0.060836	0.982	0.51798
A0A287AQA4	MTSS1L, I-BAR domain containing OS=Sus scrofa OX=9823 GN=MTSS1L	MTSS1L	75.39	4.5	2	3	1	0.887	0.996	1.043	0.98	1.107	1.058	0.986	0.945	1	1.075	0.28864	1.002	0.94552	0.932	0.152642
A0A287AQB1	Neuronal cell adhesion molecule OS=Sus scrofa OX=9823 GN=NRCAM	NRCAM	121.87	3.1	3	3	3	1.062	1.009	1.143	0.926	0.986	0.891	0.966	0.999	1.032	0.872	0.043237	0.932	0.167164	1.069	0.127522
A0A287AQB6	Tyrosine-protein phosphatase non-receptor type OS=Sus scrofa OX=9823 GN=PTPN11	PTPN11	68.011	25.5	15	24	15	1.035	1.011	1	0.971	0.996	1.044	0.98	0.981	0.95	0.989	0.63954	0.956	0.036244	0.967	0.23124
A0A287AQE8	Inositol 1,4,5-trisphosphate receptor type 2 OS=Sus scrofa OX=9823 GN=ITPR2	ITPR2	305.11	13.8	36	40	24	0.995	1.001	0.991	1.012	0.963	1.013	1.03	1.017	0.98	1	0.9971	1.013	0.438	1.013	0.59226
A0A287AQG3	MHC class I antigen 2 precursor OS=Sus scrofa OX=9823 GN=LOC100513601	LOC100513601	39.979	39.9	10	33	4	0.751	0.789	0.754	1.153	1.111	1.115	1.118	1.115	1.104	1.473	3.9937e-05	1.455	2.0544e-05	0.988	0.37526
A0A287AQG4	Synaptotagmin binding cytoplasmic RNA interacting protein OS=Sus scrofa OX=9823 GN=SYNCRIP	SYNCRIP	62.656	42.9	20	40	1	1.043	0.897	0.949	1.052	1.081	1.021	1.007	0.979	0.99	1.092	0.129699	1.03	0.5197	0.944	0.03474
A0A287AQG6	AFG1 like ATPase OS=Sus scrofa OX=9823 GN=AFG1L	AFG1L	50.324	4.8	2	3	2	1.012	1.061	1.073	1.057	0.982	1.048	0.914	1.046	0.825	0.981	0.54978	0.885	0.149996	0.902	0.21372
A0A287AQH3	ELKS/RAB6-interacting/CAST family member 1 OS=Sus scrofa OX=9823 GN=ERC1	ERC1	124.92	17.5	18	24	18	0.932	1.006	1.024	1.005	1.013	0.994	0.997	1.07	1.019	1.017	0.58296	1.042	0.31004	1.025	0.33122
A0A287AQH6	NHS like 1 OS=Sus scrofa OX=9823 GN=NHSL1	NHSL1	136.31	1.5	2	2	2
A0A287AQJ2	Leucine rich repeats and calponin homology domain containing 3 OS=Sus scrofa OX=9823 GN=LRCH3	LRCH3	79.763	7.1	5	6	4	1.009	1.014	0.997	0.975	0.912	0.963	1.034	1.038	1.075	0.944	0.050758	1.042	0.037061	1.104	0.0142753
A0A287AQL6	GEM interacting protein OS=Sus scrofa OX=9823 GN=GMIP	GMIP	101.98	11.8	9	10	9	1.075	1.007	1.024	0.896	1.004	1.031	0.977	1.05	0.97	0.944	0.27726	0.965	0.32378	1.023	0.66304
A0A287AQM4	Eukaryotic translation initiation factor 2B subunit beta OS=Sus scrofa OX=9823 GN=EIF2B2	EIF2B2	31.013	15.8	3	4	3	0.86	1.017	1.017	0.766	1.161	1.173	0.802	1.184	1.034	1.071	0.74284	1.044	0.80838	0.974	0.9165
A0A287AQP7	IWS1, SUPT6H interacting protein OS=Sus scrofa OX=9823 GN=IWS1	IWS1	94.514	15.4	8	12	8	0.949	1.029	1.011	0.968	1.119	0.982	1.035	1.065	0.928	1.027	0.6591	1.013	0.81982	0.987	0.84464
A0A287AQQ1	HDGF like 3 OS=Sus scrofa OX=9823 GN=HDGFL3	HDGFL3	22.619	23.6	5	9	4	0.939	0.971	0.986	1.021	0.973	0.984	1.075	1.019	1.067	1.028	0.24456	1.092	0.0166602	1.061	0.054802
A0A287AQT0	Replication factor C subunit 4 OS=Sus scrofa OX=9823 GN=RFC4	RFC4	32.792	13.7	3	4	3	0.985	1.882	0.945	0.714	1.084	0.833	0.852	0.907	0.786	0.69	0.2601	0.668	0.194617	0.967	0.88476
A0A287AQU0	Inhibitor of nuclear factor kappa-B kinase-interacting protein OS=Sus scrofa OX=9823 GN=IKBIP	IKBIP	42.71	17.3	6	8	5	0.905	0.967	1.036	0.934	0.995	1.019	1.033	1.081	1.04	1.014	0.77238	1.085	0.117721	1.07	0.083077
A0A287AQV2	Helicase with zinc finger OS=Sus scrofa OX=9823 GN=HELZ	HELZ	169.64	2.5	3	4	3	0.992	1.09	0.94	1.006	0.953	0.878	1.095	1.126	0.937	0.939	0.34408	1.045	0.58356	1.113	0.20358
A0A287AQW0	Myosin phosphatase Rho interacting protein OS=Sus scrofa OX=9823 GN=MPRIP	MPRIP	110.23	20	15	18	14	0.974	0.963	0.957	1.031	1.024	0.956	1.058	1.059	1.069	1.04	0.188255	1.101	9.7973e-05	1.058	0.143785
A0A287AQW6	Protein tyrosine phosphatase type IVA 2 OS=Sus scrofa OX=9823 GN=PTP4A2	PTP4A2	19.127	32.9	5	6	5	1.003	0.988	0.944	0.977	0.992	0.972	1.028	0.96	0.951	1.002	0.90916	1.001	0.97336	0.999	0.96296
A0A287AQX8	Mitochondrial ribosomal protein S31 OS=Sus scrofa OX=9823 GN=MRPS31	MRPS31	40.495	3.6	2	2	2
A0A287AQY2	THO complex 5 OS=Sus scrofa OX=9823 GN=THOC5	THOC5	75.754	3.8	3	3	3	0.924	0.93	1.046	1.049	0.975	0.909	1.114	1.007	1.055	1.011	0.85504	1.095	0.139116	1.083	0.187135
A0A287AQY5	Leucine rich repeats and calponin homology domain containing 4 OS=Sus scrofa OX=9823 GN=LRCH4	LRCH4	76.679	7	3	3	3	0.945	1.026	1.011	1.094	0.986	1.025	0.931	1.066	0.932	1.041	0.36712	0.982	0.72672	0.943	0.33432
A0A287AQY8	Periphilin 1 OS=Sus scrofa OX=9823 GN=PPHLN1	PPHLN1	35.952	9.9	3	3	3	1.091	1.063	1.082	0.937	0.959	0.994	0.967	0.975	0.947	0.893	0.003823	0.893	0.00060388	1	0.9951
A0A287AR09	Syntaxin-6 OS=Sus scrofa OX=9823 GN=STX6	STX6	28.206	15.2	3	4	3	1.034	1.012	1.006	0.958	0.991	0.965	1.011	0.942	1.094	0.955	0.024985	0.998	0.94148	1.046	0.3891
A0A287AR13	Heterogeneous nuclear ribonucleoprotein M OS=Sus scrofa OX=9823 GN=HNRNPM	HNRNPM	79.309	41.1	26	67	1	0.976	0.955	1.028	1.022	0.988	1.007	0.981	1.027	1.032	1.02	0.45484	1.027	0.37298	1.008	0.714
A0A287AR42	Family with sequence similarity 192 member A OS=Sus scrofa OX=9823 GN=FAM192A	FAM192A	28.675	6.7	2	2	2	0.992	0.982	1.014	1.062	1.044	0.94	1.031	0.98	0.969	1.019	0.67282	0.997	0.89626	0.978	0.65078
A0A287AR53	Rabaptin, RAB GTPase binding effector protein 2 OS=Sus scrofa OX=9823 GN=RABEP2	RABEP2	73.723	28	16	22	16	1.101	1.074	1.009	0.99	0.977	0.956	0.988	0.942	0.996	0.918	0.038143	0.919	0.054515	1.001	0.96918
A0A287AR56	Sulfhydryl oxidase OS=Sus scrofa OX=9823 GN=QSOX2	QSOX2	76.509	7.8	5	7	5	1.097	1.014	0.976	1.009	0.911	0.937	0.949	1.028	1.124	0.925	0.168422	1.005	0.95832	1.085	0.2348
A0A287AR59	Ubiquitin specific peptidase 8 OS=Sus scrofa OX=9823 GN=USP8	USP8	124.14	5	6	6	6	0.952	0.937	0.919	1.016	1.033	1.028	0.926	1.164	1.038	1.096	0.00127652	1.114	0.26094	1.017	0.87178
A0A287AR67	Sorcin isoform 2 OS=Sus scrofa OX=9823 GN=SRI	SRI	20.345	55.7	9	30	9	1.023	0.998	1.039	0.98	0.993	0.999	0.993	1	0.975	0.971	0.089345	0.97	0.094344	0.999	0.8915
A0A287AR68	Adenosine kinase OS=Sus scrofa OX=9823 GN=ADK	ADK	34.033	38.7	10	14	10	1.024	1.013	1.008	1.052	1.013	1.003	0.977	1.01	0.958	1.008	0.6558	0.967	0.105299	0.96	0.12552
A0A287AR84	DNA helicase OS=Sus scrofa OX=9823 GN=MCM6	MCM6	89.587	23.7	19	30	19	1.044	0.996	0.98	1.025	1.027	1.011	0.978	0.97	0.973	1.014	0.5013	0.967	0.2268	0.954	0.0009832
A0A287ARA4	CCR4-NOT transcription complex subunit 9 OS=Sus scrofa OX=9823 GN=CNOT9	CNOT9	33.947	9.7	3	3	3	0.967	1.1	1.047	1.034	0.922	1.007	1.039	0.94	0.952	0.952	0.38752	0.941	0.28674	0.989	0.83092
A0A287ARA5	Uncharacterized protein OS=Sus scrofa OX=9823 GN=APOPT1	APOPT1	65.49	31.5	17	23	1
A0A287ARA9	Uncharacterized protein OS=Sus scrofa OX=9823	---	13.941	7.3	1	1	1	1.021	1.025	1.007	0.932	0.875	0.915	1.015	1.078	1.151	0.892	0.0041198	1.063	0.24706	1.192	0.0129448
A0A287ARB3	Pro-apoptotic WT1 regulator OS=Sus scrofa OX=9823 GN=PAWR	PAWR	34.926	29.6	6	7	6	1.011	1.047	0.96	0.953	0.944	0.988	0.977	1.044	1.094	0.956	0.195742	1.032	0.4928	1.08	0.100403
A0A287ARC4	Geranylgeranyl diphosphate synthase 1 OS=Sus scrofa OX=9823 GN=GGPS1	GGPS1	34.9	11	3	5	3	0.948	0.975	1.007	0.958	1.049	0.958	0.98	1.021	1.054	1.012	0.76334	1.043	0.2026	1.03	0.45612
A0A287ARE4	Myotubularin related protein 6 OS=Sus scrofa OX=9823 GN=MTMR6	MTMR6	62.367	9.8	5	5	5	1.137	1.069	1.015	1.065	0.994	0.967	0.942	0.92	0.937	0.939	0.2268	0.869	0.0142412	0.925	0.059477
A0A287ARF2	Acyl-CoA-binding domain-containing protein 5 OS=Sus scrofa OX=9823 GN=ACBD5	ACBD5	53.501	5.6	2	3	2	0.875	1.026	1.018	1.033	0.916	0.949	1.159	0.999	1.029	0.993	0.9302	1.092	0.26876	1.1	0.177884
A0A287ARG2	Uncharacterized protein OS=Sus scrofa OX=9823	---	15.326	18.4	3	8	2	1.093	1.092	0.993	0.938	1.032	0.901	0.926	0.971	1.04	0.903	0.1172	0.924	0.16356	1.023	0.68112
A0A287ARH6	Apoptosis resistant E3 ubiquitin protein ligase 1 OS=Sus scrofa OX=9823 GN=AREL1	AREL1	86.97	1.4	1	1	1
A0A287ARI1	Eukaryotic translation initiation factor 3 subunit F OS=Sus scrofa OX=9823 GN=EIF3F	EIF3F	36.322	19	6	13	6	1.024	1.015	0.979	0.972	1.026	0.953	0.994	0.985	1.042	0.978	0.43084	1.001	0.97042	1.024	0.44804
A0A287ARJ1	Methyltransferase like 14 OS=Sus scrofa OX=9823 GN=METTL14	METTL14	42.301	5.1	2	2	2	1.037	0.936	1.097	0.982	1.116	0.964	0.949	0.943	0.988	0.997	0.97002	0.938	0.2722	0.941	0.28648
A0A287ARJ8	Uncharacterized protein OS=Sus scrofa OX=9823 GN=LOC100153899	LOC100153899	46.926	26.7	10	30	0
A0A287ARJ9	LUC7 like 2, pre-mRNA splicing factor OS=Sus scrofa OX=9823 GN=LUC7L2	LUC7L2	38.394	36	11	19	7	1.113	1.068	1.076	0.944	0.985	0.951	0.955	0.94	0.991	0.884	0.002523	0.886	0.0038767	1.002	0.9264
A0A287ARL3	Exocyst complex component 3 like 4 OS=Sus scrofa OX=9823 GN=EXOC3L4	EXOC3L4	78.099	9.9	6	7	6	1.079	0.912	1.06	0.921	1	0.856	1.075	1.039	1.076	0.91	0.25176	1.046	0.4357	1.149	0.038736
A0A287ARL7	CGG triplet repeat binding protein 1 OS=Sus scrofa OX=9823 GN=CGGBP1	CGGBP1	18.82	41.9	5	7	5	0.961	0.983	0.984	1.039	1.045	1.014	1.017	0.966	0.992	1.058	0.0093846	1.016	0.3997	0.96	0.080756
A0A287ARR0	Spliceosome RNA helicase DDX39B OS=Sus scrofa OX=9823 GN=DDX39B	DDX39B	45.955	29.2	14	28	9	0.984	1.032	1.014	1	1.016	1.002	1.025	1.034	0.995	0.996	0.80968	1.008	0.68376	1.012	0.406
A0A287ARR1	Ferritin OS=Sus scrofa OX=9823 GN=FTH1	FTH1	21.185	61.3	9	30	9	0.703	0.756	0.72	1.094	1.091	1.19	1.091	1.144	1.074	1.549	0.00025682	1.519	0.000123774	0.98	0.6033
A0A287ARR6	FERM domain containing 4A OS=Sus scrofa OX=9823 GN=FRMD4A	FRMD4A	113.05	6	4	4	4	1.101	0.961	1.152	1.017	0.935	0.943	0.954	0.978	0.977	0.901	0.166959	0.905	0.22074	1.005	0.85402
A0A287ART1	Rho GTPase activating protein 31 OS=Sus scrofa OX=9823 GN=ARHGAP31	ARHGAP31	156.43	2.7	3	3	3	1.195	1.134	0.956	0.846	0.875	0.945	0.944	0.968	1.161	0.812	0.051783	0.935	0.51672	1.153	0.129804
A0A287ARU4	Uncharacterized protein OS=Sus scrofa OX=9823 GN=SKP1	SKP1	18.658	28.8	8	19	8	0.952	1.022	1.005	0.977	0.957	0.988	1.039	0.992	1.032	0.981	0.4627	1.028	0.33836	1.048	0.052222
A0A287ARU5	Mitogen-activated protein kinase OS=Sus scrofa OX=9823 GN=MAPK12	MAPK12	41.956	8.4	2	2	2
A0A287ARV8	Mitochondrial ribosomal protein L12 OS=Sus scrofa OX=9823 GN=MRPL12	MRPL12	21.237	17.7	3	7	3	0.996	1.019	1.027	1.044	1.105	0.961	1.019	0.938	0.919	1.022	0.64688	0.945	0.157901	0.925	0.20556
A0A287ARX6	Enhancer of mRNA decapping 3 OS=Sus scrofa OX=9823 GN=EDC3	EDC3	49.218	6.1	3	3	3	0.949	1.108	1.02	0.961	0.932	1.057	1.132	0.882	0.962	0.959	0.51728	0.967	0.69008	1.009	0.95618
A0A287ARY4	Uncharacterized protein OS=Sus scrofa OX=9823 GN=SDAD1	SDAD1	70.821	1.6	1	1	1	0.838	0.945	1.034	0.953	1.036	1.018	1.072	1.042	1.067	1.067	0.35896	1.129	0.178917	1.058	0.102224
A0A287ARZ1	Thioredoxin domain containing 5 OS=Sus scrofa OX=9823 GN=TXNDC5	TXNDC5	47.99	23.9	11	19	10	1.081	1.105	1.065	0.977	0.897	0.941	0.963	1.024	0.988	0.866	0.0058367	0.915	0.0128599	1.057	0.142224
A0A287AS11	POU domain protein OS=Sus scrofa OX=9823 GN=POU2F2	POU2F2	47.335	5.9	2	3	1	1.23	0.917	0.777	1.105	1.044	0.874	0.997	0.918	1.173	1.034	0.7735	1.056	0.68004	1.022	0.8458
A0A287AS23	RNA binding motif single stranded interacting protein 1 OS=Sus scrofa OX=9823 GN=RBMS1	RBMS1	43.384	3.3	1	1	1
A0A287AS29	Nucleoside diphosphate kinase OS=Sus scrofa OX=9823 GN=NME1	NME1	17.109	51.3	9	27	4	0.957	0.951	1.005	1.02	1.007	0.956	1.018	1.038	0.926	1.024	0.42084	1.024	0.59828	1	0.97822
A0A287AS37	MOB kinase activator 2 OS=Sus scrofa OX=9823 GN=MOB2	MOB2	26.43	20.1	4	7	4	1.048	0.988	1.08	0.987	0.961	0.982	0.931	1.051	0.992	0.94	0.09022	0.954	0.34098	1.015	0.72164
A0A287AS45	COP9 signalosome subunit 7B OS=Sus scrofa OX=9823 GN=COPS7B	COPS7B	29.623	11.4	2	4	2	0.904	0.999	1.027	1.02	1.015	1.007	1.061	0.933	1.038	1.038	0.42208	1.035	0.57152	0.997	0.91456
A0A287AS53	Single stranded DNA binding protein 3 OS=Sus scrofa OX=9823 GN=SSBP3	SSBP3	37.697	5.8	2	2	1
A0A287AS56	Uncharacterized protein OS=Sus scrofa OX=9823 GN=LOC110259107	LOC110259107	49.03	2.3	1	1	1	0.961	0.944	0.972	1.04	0.985	0.996	1.127	1.007	0.981	1.05	0.059376	1.083	0.147843	1.031	0.5589
A0A287AS63	Ras and Rab interactor 3 OS=Sus scrofa OX=9823 GN=RIN3	RIN3	67.579	14.4	8	9	8	0.97	0.904	1.031	1.056	1.074	1.07	0.957	1.064	0.93	1.102	0.124642	1.016	0.79568	0.922	0.183
A0A287AS71	Mediator of RNA polymerase II transcription subunit 1 OS=Sus scrofa OX=9823 GN=MED1	MED1	159.73	2.7	3	3	3
A0A287AS86	Myotubularin related protein 12 OS=Sus scrofa OX=9823 GN=MTMR12	MTMR12	79.942	3.9	2	2	2	1.002	0.85	0.901	0.896	1.062	1.031	1.011	1.059	1.209	1.086	0.31414	1.191	0.072856	1.097	0.28524
A0A287AS98	Protein kinase, DNA-activated, catalytic polypeptide OS=Sus scrofa OX=9823 GN=PRKDC	PRKDC	459.8	1.2	5	6	5	1.125	1.263	0.964	0.443	0.931	1.01	0.887	0.943	1.444	0.711	0.22064	0.977	0.81948	1.373	0.30752
A0A287ASA9	Pleckstrin homology and FYVE domain containing 2 OS=Sus scrofa OX=9823 GN=PLEKHF2	PLEKHF2	27.853	7.2	2	4	2	1.122	1.068	1.021	1.044	0.993	1.026	0.892	0.884	1.006	0.954	0.20608	0.866	0.044077	0.908	0.091341
A0A287ASD0	60S ribosomal protein L5 OS=Sus scrofa OX=9823 GN=RPL5	RPL5	34.353	39.4	14	45	14	0.994	1.027	1.019	1.011	1.01	1.018	0.989	0.981	0.936	1	0.98238	0.956	0.084057	0.956	0.121804
A0A287ASH4	c-Myc-binding protein OS=Sus scrofa OX=9823 GN=RRAGC	RRAGC	44.205	21.6	6	13	1	1.132	1.12	1.117	0.999	0.961	0.997	0.823	0.976	0.894	0.878	0.00059713	0.799	0.044462	0.911	0.132523
A0A287ASK1	Myosin-11 OS=Sus scrofa OX=9823 GN=MYH11	MYH11	203.43	47.6	89	287	1
A0A287ASL3	Ral guanine nucleotide dissociation stimulator-like 2 OS=Sus scrofa OX=9823 GN=RGL2	RGL2	70.166	2.1	1	2	1	1.012	0.85	1.133	1.048	1.127	0.836	1	1.013	0.994	1.005	0.97346	1.004	0.90862	0.999	0.94884
A0A287ASM6	Cyclin-dependent kinase 10 OS=Sus scrofa OX=9823 GN=CDK10	CDK10	36.414	4.7	1	1	1
A0A287ASQ1	RNA-binding protein EWS OS=Sus scrofa OX=9823 GN=EWSR1	EWSR1	64.168	12.7	7	12	7	1.033	1.06	0.959	1.017	0.989	1.026	0.97	0.963	0.977	0.993	0.8649	0.953	0.26274	0.96	0.025742
A0A287ASQ7	Zinc finger and BTB domain containing 8 opposite strand OS=Sus scrofa OX=9823 GN=ZBTB8OS	ZBTB8OS	19.525	16.2	3	5	3
A0A287ASQ8	MHC class I antigen 8 precursor OS=Sus scrofa OX=9823 GN=SLA-8	SLA-8	44.502	15.9	5	8	4	0.965	0.892	1.212	1.014	0.987	1.025	0.821	0.958	1.137	0.986	0.95716	0.95	0.716	0.964	0.67676
A0A287ASR0	Uncharacterized protein OS=Sus scrofa OX=9823 GN=SLC25A10	SLC25A10	31.255	8.8	2	2	2
A0A287ASR2	Coiled-coil domain containing 88A OS=Sus scrofa OX=9823 GN=CCDC88A	CCDC88A	183.06	5.5	9	10	9	0.92	0.986	0.96	0.968	0.995	0.977	1.011	0.994	1.062	1.026	0.30032	1.07	0.074703	1.043	0.121797
A0A287AST0	BOK, BCL2 family apoptosis regulator OS=Sus scrofa OX=9823 GN=BOK	BOK	23.377	6.6	1	1	1
A0A287AST2	Phosphatidylinositol 4-phosphate 5-kinase type-1 alpha OS=Sus scrofa OX=9823 GN=PIP5K1A	PIP5K1A	58.322	6.6	3	4	3	0.926	0.976	0.935	0.948	0.968	1.009	1.098	1.097	1.058	1.031	0.28038	1.147	0.0024995	1.112	0.0084398
A0A287AST6	3-phosphoinositide dependent protein kinase 1 OS=Sus scrofa OX=9823 GN=PDPK1	PDPK1	63.398	7.7	4	4	4	1.056	0.992	1.04	0.823	1.078	1.168	1.098	0.863	0.889	0.994	0.88418	0.923	0.33408	0.929	0.62412
A0A287ASX4	Vasodilator stimulated phosphoprotein OS=Sus scrofa OX=9823 GN=VASP	VASP	40.056	49.1	20	65	3	1.041	1.028	0.967	1.005	1.014	1.061	0.977	0.965	0.935	1.014	0.6326	0.948	0.111595	0.934	0.032958
A0A287ASX8	Ubiquinone biosynthesis monooxygenase COQ6, mitochondrial OS=Sus scrofa OX=9823 GN=COQ6	COQ6	48.335	6	3	3	3
A0A287AT01	Calcium/calmodulin dependent protein kinase kinase 2 OS=Sus scrofa OX=9823 GN=CAMKK2	CAMKK2	58.76	9.8	3	3	3	1.003	0.95	1.038	1.022	1.135	0.96	0.749	1.018	0.896	1.042	0.51384	0.89	0.25398	0.854	0.183958
A0A287AT05	Serum albumin OS=Sus scrofa OX=9823 GN=ALB	ALB	59.155	79.5	53	290	1
A0A287AT18	Proteasome subunit alpha type OS=Sus scrofa OX=9823 GN=PSMA7	PSMA7	27.867	50	12	26	12	1.012	1.021	1.052	1.007	0.984	1.055	0.958	0.972	0.961	0.987	0.61102	0.937	0.0066357	0.949	0.068738
A0A287AT21	Sorbitol dehydrogenase OS=Sus scrofa OX=9823 GN=SORD	SORD	38.049	11.8	3	3	3	0.904	0.981	0.795	1.066	0.879	1.062	1.12	1.108	1.108	1.122	0.2632	1.245	0.068122	1.109	0.2331
A0A287AT27	Family with sequence similarity 103 member A1 OS=Sus scrofa OX=9823 GN=FAM103A1	FAM103A1	14.206	11	1	1	1	0.935	1.037	1.071	0.998	1	1.04	0.983	1.016	0.929	0.998	0.99712	0.962	0.48284	0.964	0.27222
A0A287AT29	SH3 domain binding protein 4 OS=Sus scrofa OX=9823 GN=SH3BP4	SH3BP4	100.49	1.8	1	1	1	1.37	0.946	0.801	0.88	1.061	1.041	0.752	1.17	1.036	0.957	0.90316	0.949	0.8438	0.992	0.8895
A0A287AT36	Complement component C8 beta chain precursor OS=Sus scrofa OX=9823 GN=C8B	C8B	66.597	2.5	1	1	1
A0A287AT38	A-kinase anchor protein 2 OS=Sus scrofa OX=9823 GN=AKAP2	AKAP2	120.95	25.5	19	22	18	1.059	1.043	1.031	0.917	0.969	0.936	0.958	0.994	1.051	0.901	0.0042238	0.959	0.199344	1.064	0.120641
A0A287AT43	Methyltransferase-like protein OS=Sus scrofa OX=9823 GN=METTL2A	METTL2A	36.121	4.1	1	1	1
A0A287AT45	Small nuclear ribonucleoprotein-associated protein OS=Sus scrofa OX=9823 GN=SNRPN	SNRPN	23.829	12.9	4	9	1	1.289	1.2	1.078	0.957	1.086	1.032	0.83	0.952	0.603	0.862	0.081859	0.669	0.044944	0.776	0.125898
A0A287AT48	Uncharacterized protein OS=Sus scrofa OX=9823 GN=LOC100153899	LOC100153899	46.976	28.8	13	33	0
A0A287AT55	Mannose receptor C type 2 OS=Sus scrofa OX=9823 GN=MRC2	MRC2	165.69	14.9	19	22	19	1.079	1.05	1.023	0.921	0.99	0.978	0.979	0.924	0.956	0.917	0.0322	0.907	0.012775	0.99	0.73286
A0A287AT83	Uncharacterized protein OS=Sus scrofa OX=9823	---	68.963	29	14	21	14	0.983	0.969	0.981	1.021	0.981	0.972	0.988	1.035	1.083	1.014	0.43416	1.059	0.102864	1.044	0.2318
A0A287AT86	Rhomboid domain containing 1 OS=Sus scrofa OX=9823 GN=RHBDD1	RHBDD1	36.636	3.1	1	1	1	0.929	0.814	0.927	0.943	1.072	1.148	1.064	1.039	1.08	1.185	0.08088	1.192	0.017056	1.006	0.8798
A0A287AT89	Transmembrane protein 164 OS=Sus scrofa OX=9823 GN=TMEM164	TMEM164	29.276	5.8	1	1	1
A0A287ATD3	Importin subunit alpha OS=Sus scrofa OX=9823 GN=KPNA4	KPNA4	57.873	17.7	7	10	4	1.01	1.002	1.058	1.074	1	0.996	1.023	0.909	0.939	1	0.99206	0.935	0.157162	0.935	0.190002
A0A287ATE3	Uncharacterized protein OS=Sus scrofa OX=9823	---	13.028	24.6	3	5	1	1.198	1.284	1.153	1.043	1.044	0.989	0.767	0.808	0.728	0.846	0.0100961	0.634	0.00046475	0.749	0.00115966
A0A287ATI2	Shroom family member 3 OS=Sus scrofa OX=9823 GN=SHROOM3	SHROOM3	197.56	0.5	1	1	1	1.15	1.057	1.028	0.966	0.911	0.852	1.084	0.951	1.019	0.844	0.026343	0.944	0.31712	1.119	0.098503
A0A287ATJ5	BRI3 binding protein OS=Sus scrofa OX=9823 GN=BRI3BP	BRI3BP	26.985	16.1	3	4	3	0.959	1.002	0.97	0.989	0.995	1.056	1.077	1.05	0.916	1.037	0.21614	1.038	0.5355	1.001	0.98538
A0A287ATL6	G protein signaling modulator 1 OS=Sus scrofa OX=9823 GN=GPSM1	GPSM1	71.827	9.2	4	4	4	1.098	0.991	1.026	1.007	1.038	0.943	0.959	1.059	0.901	0.959	0.37212	0.937	0.30088	0.977	0.67506
A0A287ATL7	Apoptotic chromatin condensation inducer 1 OS=Sus scrofa OX=9823 GN=ACIN1	ACIN1	141.48	18.5	19	30	19	1.11	0.978	1.043	0.929	0.991	1	0.976	0.963	0.936	0.933	0.186304	0.918	0.094682	0.985	0.59502
A0A287ATM1	G protein-coupled receptor kinase OS=Sus scrofa OX=9823 GN=GRK5	GRK5	55.537	18.4	6	7	5	0.99	0.966	0.994	0.944	0.915	1.008	1.072	1.095	1.035	0.972	0.3828	1.085	0.0119396	1.117	0.027955
A0A287ATM9	Vacuolar protein sorting-associated protein 45 OS=Sus scrofa OX=9823 GN=VPS45	VPS45	60.649	14.6	8	10	8	0.932	1.018	1.012	0.961	0.979	0.964	1.031	1.023	0.995	0.98	0.5488	1.029	0.38566	1.05	0.0163804
A0A287ATP7	YTH domain containing 2 OS=Sus scrofa OX=9823 GN=YTHDC2	YTHDC2	148.44	2.7	2	2	2
A0A287ATP9	Ubiquitin like modifier activating enzyme 5 OS=Sus scrofa OX=9823 GN=UBA5	UBA5	44.942	12.9	4	4	4	0.912	1.141	0.93	0.916	1.109	1.012	0.988	1.112	0.891	1.018	0.83468	1.003	0.9702	0.985	0.85628
A0A287ATS6	Neurolysin, mitochondrial OS=Sus scrofa OX=9823 GN=NLN	NLN	76.698	11.7	8	9	8	0.973	1.037	1.066	1.035	0.848	0.972	0.978	1.09	0.825	0.928	0.29868	0.941	0.4762	1.013	0.9242
A0A287ATT2	Uncharacterized protein OS=Sus scrofa OX=9823	---	36.034	35.1	10	44	2
A0A287ATT3	Uncharacterized protein OS=Sus scrofa OX=9823 GN=LOC100523244	LOC100523244	43.28	6.9	2	2	1
A0A287ATT9	PTTG1 interacting protein OS=Sus scrofa OX=9823 GN=PTTG1IP	PTTG1IP	19.881	8	2	2	2	0.893	0.863	0.868	0.964	1.234	1.063	1.052	1.06	1.015	1.243	0.099704	1.192	0.00050192	0.959	0.63952
A0A287ATW2	Protein phosphatase 1 regulatory subunit 12A OS=Sus scrofa OX=9823 GN=PPP1R12A	PPP1R12A	80.877	27.1	19	33	2	1.096	1.055	0.922	0.923	0.929	1.015	0.998	0.997	0.968	0.933	0.32792	0.964	0.56058	1.033	0.35384
A0A287ATX4	Wiskott-Aldrich syndrome like OS=Sus scrofa OX=9823 GN=WASL	WASL	54.641	6.7	4	5	4	0.927	1.01	1.048	1.054	0.925	1.058	0.935	0.912	1.112	1.017	0.7853	0.991	0.88216	0.974	0.73208
A0A287ATZ5	Regulatory factor X1 OS=Sus scrofa OX=9823 GN=RFX1	RFX1	89.291	7.3	3	3	3	1.096	0.997	1.004	0.962	1.005	1.02	0.975	1.037	0.926	0.964	0.3694	0.949	0.30268	0.984	0.66554
A0A287AU05	HECT domain E3 ubiquitin protein ligase 3 OS=Sus scrofa OX=9823 GN=HECTD3	HECTD3	57.947	9.7	4	5	4
A0A287AU24	Ribonucleoprotein, PTB binding 1 OS=Sus scrofa OX=9823 GN=RAVER1	RAVER1	73.436	16.9	8	9	8	0.987	0.97	1.019	0.984	1.027	1.013	0.965	1.01	1.059	1.016	0.4494	1.019	0.5708	1.003	0.93082
A0A287AU47	Pyridoxal dependent decarboxylase domain containing 1 OS=Sus scrofa OX=9823 GN=PDXDC1	PDXDC1	82.84	18.6	10	11	10	1.026	0.944	1.036	0.985	1.025	1.014	0.931	1.051	0.985	1.006	0.8437	0.987	0.78404	0.981	0.61544
A0A287AU48	Hematopoietic progenitor cell antigen CD34 precursor OS=Sus scrofa OX=9823 GN=CD34	CD34	41.077	4.4	2	2	2	1.169	1.078	1.085	0.952	0.899	1.041	0.935	0.94	0.921	0.868	0.046061	0.839	0.0028211	0.967	0.53562
A0A287AU65	Reversion inducing cysteine rich protein with kazal motifs OS=Sus scrofa OX=9823 GN=RECK	RECK	99.478	12	10	12	10	1.016	1.029	1.007	1.049	1.007	0.985	0.954	1.012	0.986	0.996	0.8506	0.967	0.138779	0.971	0.30342
A0A287AU67	Golgi reassembly stacking protein 1 OS=Sus scrofa OX=9823 GN=GORASP1	GORASP1	44.874	4.4	2	3	1	0.99	0.972	1.097	0.986	1.009	0.8	1.17	1.008	0.974	0.914	0.3194	1.03	0.69874	1.128	0.25806
A0A287AU72	Ena/VASP-like protein OS=Sus scrofa OX=9823 GN=EVL	EVL	44.224	49.4	20	54	20	0.971	0.956	0.965	1.038	1.017	1	0.999	1.016	1.004	1.056	0.0094415	1.044	0.0031182	0.988	0.37844
A0A287AU87	Uncharacterized protein OS=Sus scrofa OX=9823 GN=RNF220	RNF220	34.442	4.5	1	1	1
A0A287AUA3	Jumonji domain containing 1C OS=Sus scrofa OX=9823 GN=JMJD1C	JMJD1C	255.49	0.4	1	1	1
A0A287AUB7	Guanylate cyclase soluble subunit beta-1 OS=Sus scrofa OX=9823 GN=GUCY1B1	GUCY1B1	70.521	20	11	17	11	0.994	0.999	0.992	1.001	0.987	1.002	0.967	0.966	1.015	1.002	0.77052	0.988	0.51994	0.986	0.4458
A0A287AUC3	Ankyrin 1 OS=Sus scrofa OX=9823 GN=ANK1	ANK1	152.48	21.1	23	32	20	0.937	0.981	1.016	1.082	1.058	1.062	0.933	0.979	0.985	1.091	0.022821	0.987	0.69056	0.905	0.0056011
A0A287AUD3	Cas-scaffolding protein family member 4 OS=Sus scrofa OX=9823 GN=CASS4	CASS4	74.216	6.4	4	5	4
A0A287AUH1	Uncharacterized protein OS=Sus scrofa OX=9823	---	34.075	16.3	5	6	5	0.929	1.042	0.855	0.993	1.013	1.07	1.08	1.059	0.974	1.088	0.2278	1.102	0.20514	1.012	0.78208
A0A287AUH3	Meningioma expressed antigen 5 (hyaluronidase) OS=Sus scrofa OX=9823 GN=MGEA5	MGEA5	99.254	7.8	5	6	5	0.993	0.966	0.983	0.999	0.971	0.994	1.01	1.025	1.076	1.007	0.56576	1.057	0.055378	1.05	0.084096
A0A287AUH9	Synaptopodin 2 OS=Sus scrofa OX=9823 GN=SYNPO2	SYNPO2	135.65	23.3	27	40	27	1.015	1.048	1.033	0.985	0.965	0.944	0.973	1.01	0.99	0.935	0.0117445	0.96	0.046139	1.027	0.174202
A0A287AUK0	TP53 induced glycolysis regulatory phosphatase OS=Sus scrofa OX=9823 GN=TIGAR	TIGAR	25.449	7.3	1	1	1
A0A287AUK1	Dephospho-CoA kinase domain containing OS=Sus scrofa OX=9823 GN=DCAKD	DCAKD	26.244	9.2	2	2	2	0.918	1.074	0.955	1.039	0.997	0.99	0.972	1.061	1.007	1.027	0.59584	1.032	0.57488	1.005	0.89406
A0A287AUM0	Protein tyrosine phosphatase, non-receptor type 13 OS=Sus scrofa OX=9823 GN=PTPN13	PTPN13	265.21	1.2	3	3	3	0.937	1.424	1.183	0.737	0.893	0.847	1.065	0.921	0.98	0.699	0.060662	0.837	0.26668	1.197	0.062905
A0A287AUN2	Methyltransferase like 3 OS=Sus scrofa OX=9823 GN=METTL3	METTL3	55.58	12.7	4	5	4	1.085	0.994	0.984	0.915	1.006	1.062	1.023	0.968	0.982	0.974	0.63558	0.971	0.45404	0.997	0.97182
A0A287AUN4	Vesicle associated membrane protein 5 OS=Sus scrofa OX=9823 GN=VAMP5	VAMP5	12.667	11.2	1	2	1	0.825	0.988	0.917	1.102	1.051	0.991	1.042	1.045	1.047	1.152	0.077899	1.148	0.114902	0.997	0.94838
A0A287AUQ4	Uncharacterized protein OS=Sus scrofa OX=9823 GN=HOOK3	HOOK3	67.469	20.5	10	13	1
A0A287AUQ9	A-kinase anchoring protein 12 OS=Sus scrofa OX=9823 GN=AKAP12	AKAP12	177.08	34.7	45	75	3	1.165	1.284	1.183	0.84	1.046	0.978	0.955	1	0.924	0.789	0.028176	0.793	0.0036162	1.005	0.9039
A0A287AUT1	Plexin B2 OS=Sus scrofa OX=9823 GN=PLXNB2	PLXNB2	203.32	18.3	26	36	26	0.985	1.025	0.96	0.976	0.973	0.965	1.015	1.006	1.015	0.981	0.3891	1.022	0.36648	1.042	0.0008024
A0A287AUT7	Coiled-coil domain containing 50 OS=Sus scrofa OX=9823 GN=CCDC50	CCDC50	35.704	15.4	5	6	5	1.15	1.195	1.195	0.928	0.911	0.908	0.884	0.862	0.96	0.776	6.1254e-05	0.764	0.00152001	0.985	0.65406
A0A287AUV0	GIT ArfGAP 1 OS=Sus scrofa OX=9823 GN=GIT1	GIT1	77.476	11.4	7	10	6	0.983	0.93	0.972	0.986	0.98	1.06	0.968	1.017	1.09	1.049	0.193678	1.066	0.176516	1.016	0.73454
A0A287AUW4	Uncharacterized protein OS=Sus scrofa OX=9823 GN=SUB1	SUB1	14.395	43.3	5	26	5	1.086	1.095	1.11	0.974	1.013	0.941	0.9	0.891	0.915	0.89	0.0061842	0.822	4.0346e-05	0.924	0.02578
A0A287AUX2	DNA polymerase epsilon 4, accessory subunit OS=Sus scrofa OX=9823 GN=POLE4	POLE4	12.367	8.4	1	1	1
A0A287AUY0	Uncharacterized protein OS=Sus scrofa OX=9823	---	8.9413	12.8	1	2	1	0.979	0.951	0.794	1.016	1.131	1.132	0.975	1.039	1.005	1.204	0.065256	1.108	0.191958	0.921	0.112721
A0A287AV05	Uncharacterized protein OS=Sus scrofa OX=9823 GN=GOPC	GOPC	49.913	8.4	4	4	4
A0A287AV20	Alpha-galactosidase OS=Sus scrofa OX=9823 GN=NAGA	NAGA	42.048	26.1	8	20	8	0.949	0.922	1.004	0.973	0.993	0.99	1.015	1.048	1.057	1.028	0.33334	1.085	0.042022	1.055	0.0177781
A0A287AV25	Thimet oligopeptidase OS=Sus scrofa OX=9823 GN=THOP1	THOP1	65.875	31.1	19	29	19	1.091	1.012	1.065	0.995	0.977	1.087	0.933	0.918	1.041	0.966	0.42036	0.913	0.111318	0.945	0.3327
A0A287AV28	Glycerol-3-phosphate dehydrogenase [NAD(+)] OS=Sus scrofa OX=9823	---	37.97	14.7	7	17	1	0.945	0.928	0.903	1.259	1.145	1.203	0.873	0.991	0.774	1.299	0.00101501	0.95	0.48402	0.731	0.0142608
A0A287AV40	Ankyrin repeat domain 12 OS=Sus scrofa OX=9823 GN=ANKRD12	ANKRD12	201.89	0.5	1	1	1	0.859	0.943	0.878	1.009	0.974	0.991	1.074	1.17	1.12	1.11	0.024942	1.255	0.0037197	1.131	0.0101032
A0A287AV47	Serine and arginine repetitive matrix 1 OS=Sus scrofa OX=9823 GN=SRRM1	SRRM1	109.39	21.9	19	30	19	1.039	1.137	1.086	1.013	0.992	0.995	0.921	0.844	0.878	0.92	0.036322	0.81	0.0043827	0.881	0.0081448
A0A287AV57	Ataxin 2 like OS=Sus scrofa OX=9823 GN=ATXN2L	ATXN2L	116.51	17.3	16	19	15	0.9	0.957	0.966	1.046	1.065	1.046	1.004	1.065	1.026	1.118	0.0081405	1.096	0.030475	0.98	0.33242
A0A287AV76	BCL2 associated athanogene 2 OS=Sus scrofa OX=9823 GN=BAG2	BAG2	23.644	15.2	3	3	3	1.035	1.04	1.031	0.91	0.98	0.922	1.012	1.146	0.944	0.905	0.048975	0.999	0.94374	1.103	0.193565
A0A287AV77	Dedicator of cytokinesis 10 OS=Sus scrofa OX=9823 GN=DOCK10	DOCK10	240.42	11.5	22	24	21	1.053	1.023	1.064	1.05	1.001	0.995	0.956	0.906	0.945	0.97	0.2138	0.894	0.0050595	0.922	0.025724
A0A287AV78	Solute carrier family 8 member A1 OS=Sus scrofa OX=9823 GN=SLC8A1	SLC8A1	104.9	3.6	3	4	3	0.886	0.94	1.012	1.17	1.081	0.962	1.095	0.947	0.913	1.132	0.149179	1.041	0.59678	0.92	0.35198
A0A287AV82	Upstream transcription factor 2, c-fos interacting OS=Sus scrofa OX=9823 GN=USF2	USF2	36.967	11	3	3	3	0.936	1.082	1.14	1.098	1.042	1.14	0.808	0.98	0.782	1.039	0.56262	0.814	0.0866	0.784	0.029737
A0A287AVA0	LSM12 homolog OS=Sus scrofa OX=9823 GN=LSM12	LSM12	21.701	11.8	2	3	2
A0A287AVA9	Uncharacterized protein OS=Sus scrofa OX=9823 GN=LOC100153899	LOC100153899	46.968	20.6	8	23	2	0.746	0.726	0.822	0.979	1.001	1.087	1.22	1.175	1.298	1.337	0.0041413	1.61	0.00055874	1.204	0.0124844
A0A287AVF3	Enolase 2 OS=Sus scrofa OX=9823 GN=ENO2	ENO2	34.704	13.3	3	7	1
A0A287AVG1	26S proteasome regulatory subunit 8 OS=Sus scrofa OX=9823 GN=PSMC5	PSMC5	45.285	46.5	15	29	14	0.977	1.016	1.01	1.007	0.991	1.028	1.015	1	1.026	1.008	0.65988	1.013	0.42498	1.005	0.71916
A0A287AVH6	Phosphatidylinositol 4-kinase type 2 alpha OS=Sus scrofa OX=9823 GN=PI4K2A	PI4K2A	46.435	14.8	5	11	5	1.074	1.007	0.992	0.919	1.026	0.962	0.985	1.028	0.989	0.946	0.23608	0.977	0.45682	1.033	0.39586
A0A287AVH9	RNA binding motif protein 15 OS=Sus scrofa OX=9823 GN=RBM15	RBM15	99.912	10.6	9	10	8	1.11	1.124	0.665	0.889	0.882	0.984	0.942	1.272	1.175	0.95	0.8975	1.169	0.41682	1.23	0.106363
A0A287AVI7	Uncharacterized protein OS=Sus scrofa OX=9823 GN=RBSN	RBSN	86.024	5	3	3	3	0.971	1.015	0.892	0.949	1.054	0.84	1.049	1.115	1.133	0.988	0.85176	1.146	0.037337	1.16	0.094659
A0A287AVJ4	Dual specificity phosphatase 12 OS=Sus scrofa OX=9823 GN=DUSP12	DUSP12	35.981	2.8	1	1	1
A0A287AVJ6	Uncharacterized protein OS=Sus scrofa OX=9823 GN=TTC1	TTC1	33.704	22.6	7	7	7	0.979	1.066	1.004	1.076	0.981	1.07	0.996	0.998	1.026	1.026	0.55762	0.99	0.75544	0.966	0.33976
A0A287AVK3	High mobility group 20B OS=Sus scrofa OX=9823 GN=HMG20B	HMG20B	35.858	2.8	1	1	1
A0A287AVK7	Family with sequence similarity 120C OS=Sus scrofa OX=9823 GN=FAM120C	FAM120C	104.99	1.9	2	3	1
A0A287AVM9	Zinc finger CCHC-type containing 11 OS=Sus scrofa OX=9823 GN=ZCCHC11	ZCCHC11	130.9	1.7	2	2	2
A0A287AVN8	Uncharacterized protein OS=Sus scrofa OX=9823	---	8.1198	15.1	1	1	1
A0A287AVQ1	ATP-dependent RNA helicase DDX3X OS=Sus scrofa OX=9823 GN=DDX3X	DDX3X	72.946	34	21	41	2	0.951	0.966	0.942	1.012	1.037	1.076	0.994	1.031	1.006	1.093	0.0100186	1.06	0.010963	0.97	0.21876
A0A287AVR0	Eukaryotic translation initiation factor 3 subunit C OS=Sus scrofa OX=9823 GN=LOC110260088	LOC110260088	105.62	21.4	21	35	21	1.015	1.011	1.002	0.99	1.006	1.044	0.978	0.979	0.978	1.004	0.8294	0.969	0.0147411	0.965	0.156742
A0A287AVW2	Elongation factor Ts, mitochondrial OS=Sus scrofa OX=9823 GN=TSFM	TSFM	41.811	11.7	4	7	4	1.033	0.991	1.011	0.981	0.969	1.039	1.056	0.953	1.027	0.985	0.56074	1	0.98954	1.016	0.70664
A0A287AW16	Zinc finger protein 135 OS=Sus scrofa OX=9823 GN=ZNF135	ZNF135	66.017	5.1	1	1	1	0.738	0.846	0.934	1.138	0.929	0.972	1.118	0.953	1.375	1.207	0.10906	1.369	0.071721	1.134	0.38974
A0A287AW23	Sodium leak channel, non-selective OS=Sus scrofa OX=9823 GN=NALCN	NALCN	197.37	0.7	1	2	1	1.019	1.002	0.96	1.023	1.057	1.051	0.987	0.964	0.952	1.05	0.073178	0.974	0.27198	0.927	0.0066401
A0A287AW49	Uncharacterized protein OS=Sus scrofa OX=9823 GN=RAB11FIP1	RAB11FIP1	69.997	8.3	5	7	5	0.886	0.923	0.964	0.958	0.923	0.979	1.012	1.021	1.099	1.031	0.35462	1.129	0.027163	1.095	0.044524
A0A287AW54	Golgi integral membrane protein 4 OS=Sus scrofa OX=9823 GN=GOLIM4	GOLIM4	79.732	8.6	6	9	6	1.06	1.014	1.017	0.996	0.972	0.972	0.992	1.033	0.949	0.951	0.038678	0.962	0.24144	1.012	0.69276
A0A287AW55	UEV and lactate/malate dehyrogenase domains OS=Sus scrofa OX=9823 GN=UEVLD	UEVLD	52.16	11.9	4	6	4	0.914	0.988	0.894	0.933	1.033	0.958	1.01	1.123	1.162	1.046	0.35684	1.178	0.034719	1.127	0.084977
A0A287AW61	Anthrax toxin receptor 1 OS=Sus scrofa OX=9823 GN=ANTXR1	ANTXR1	60.182	3.7	2	2	2	1.064	1.062	1.149	1.044	0.984	0.907	0.9	0.903	0.996	0.896	0.084019	0.855	0.020203	0.954	0.42302
A0A287AW63	Uncharacterized protein OS=Sus scrofa OX=9823 GN=CHCHD7	CHCHD7	9.7791	22.4	1	1	1	0.996	1.029	1.033	0.903	1.067	0.976	1.008	1.012	0.988	0.963	0.47018	0.984	0.29858	1.021	0.6825
A0A287AW85	Kinesin-like protein OS=Sus scrofa OX=9823 GN=KIF3C	KIF3C	79.165	1.1	1	1	1	0.961	0.907	0.963	1.027	1.028	0.94	1.01	0.997	1.182	1.058	0.191697	1.126	0.115723	1.065	0.38538
A0A287AW94	Uncharacterized protein OS=Sus scrofa OX=9823	---	20.645	20.3	4	5	4	1.003	0.99	1.019	0.994	0.991	0.879	1.007	1.097	1.044	0.951	0.27742	1.045	0.171038	1.099	0.114536
A0A287AWB5	Protein ABHD16A OS=Sus scrofa OX=9823 GN=ABHD16A	ABHD16A	62.877	17.9	8	8	8	1.048	0.883	0.938	1.099	1.004	0.887	1.047	1.075	1.044	1.042	0.6426	1.104	0.118982	1.059	0.43428
A0A287AWD8	Carbonic anhydrase 13 OS=Sus scrofa OX=9823 GN=CA13	CA13	29.581	13	3	7	3	0.971	1.099	0.906	0.994	0.966	1.076	1.023	0.937	0.95	1.02	0.75082	0.978	0.76622	0.958	0.3754
A0A287AWF1	MHC class I antigen 2 precursor OS=Sus scrofa OX=9823 GN=LOC100513601	LOC100513601	40.076	34.1	8	22	1
A0A287AWF7	Kinesin family member 13A OS=Sus scrofa OX=9823 GN=KIF13A	KIF13A	174.67	3.2	5	9	1
A0A287AWF8	Uncharacterized protein OS=Sus scrofa OX=9823	---	13.286	8.8	1	1	1
A0A287AWG3	Autophagy-related protein 9 OS=Sus scrofa OX=9823 GN=ATG9A	ATG9A	81.824	2.5	2	2	2	1.203	0.902	1.037	1.003	0.986	0.821	1.071	0.989	1.013	0.894	0.3586	0.978	0.86338	1.094	0.2452
A0A287AWH5	Nuclear ubiquitous casein and cyclin-dependent kinase substrate 1 OS=Sus scrofa OX=9823 GN=NUCKS1	NUCKS1	23.341	25.4	5	14	5	1.084	1.064	1.067	1.003	0.947	0.989	0.957	0.925	0.914	0.914	0.0078383	0.87	0.00072328	0.951	0.08748
A0A287AWI4	Protein tyrosine phosphatase, receptor type J OS=Sus scrofa OX=9823 GN=PTPRJ	PTPRJ	143.3	9.8	12	16	12	0.976	0.988	0.978	1	1.066	1.091	0.944	0.958	0.983	1.073	0.117382	0.981	0.188037	0.914	0.035142
A0A287AWI9	Eukaryotic translation elongation factor 2 OS=Sus scrofa OX=9823 GN=EEF2	EEF2	95.353	38.9	37	122	36	0.97	1	1.002	1.031	1.017	1.025	0.994	1.004	0.97	1.034	0.040502	0.999	0.9315	0.966	0.03364
A0A287AWL6	WD repeat domain 41 OS=Sus scrofa OX=9823 GN=WDR41	WDR41	49.503	7.5	3	3	3
A0A287AWL8	Trafficking protein particle complex 6B OS=Sus scrofa OX=9823 GN=TRAPPC6B	TRAPPC6B	10.736	31.9	3	3	3
A0A287AWM5	Synaptogyrin-1 OS=Sus scrofa OX=9823 GN=SYNGR1	SYNGR1	23.096	5.7	1	1	1	0.966	0.799	0.976	1.308	0.882	0.86	0.932	0.893	1.402	1.113	0.57494	1.177	0.4076	1.058	0.79806
A0A287AWN1	MAPK regulated corepressor interacting protein 1 OS=Sus scrofa OX=9823 GN=MCRIP1	MCRIP1	11.024	38.1	3	6	3	1.084	1.009	0.881	1.005	1.008	0.956	0.964	1.065	1.054	0.998	0.98006	1.037	0.6028	1.038	0.36224
A0A287AWN6	Golgi to ER traffic protein 4 OS=Sus scrofa OX=9823 GN=GET4	GET4	36.455	3.7	1	2	1	0.932	0.928	0.97	1.026	1.161	0.984	1.011	1.052	0.95	1.12	0.09694	1.065	0.132278	0.95	0.44048
A0A287AWP8	Complement C5a anaphylatoxin OS=Sus scrofa OX=9823 GN=C5	C5	180.38	4.7	8	8	8	0.989	0.987	1.011	0.934	0.941	0.919	1.126	1.103	1.02	0.935	0.0030157	1.088	0.055324	1.163	0.0083194
A0A287AWQ9	Trafficking protein particle complex subunit OS=Sus scrofa OX=9823 GN=TRAPPC3	TRAPPC3	20.29	30.6	6	9	6	0.964	0.965	0.976	0.979	0.987	0.95	1.061	0.992	0.966	1.004	0.78042	1.039	0.31274	1.035	0.32294
A0A287AWR3	Phosphodiesterase OS=Sus scrofa OX=9823 GN=PDE3A	PDE3A	91.423	10.2	7	10	7	0.969	0.949	1.068	0.949	1.037	0.992	0.86	0.941	1	0.997	0.96632	0.938	0.32058	0.941	0.2853
A0A287AWS0	Mitochondrial ribosomal protein L41 OS=Sus scrofa OX=9823 GN=MRPL41	MRPL41	15.048	7.4	1	1	1	0.898	0.995	1.075	1.007	1.047	1.161	0.936	0.957	0.93	1.083	0.2955	0.951	0.4197	0.878	0.041542
A0A287AWS9	Heme oxygenase OS=Sus scrofa OX=9823 GN=HMOX1	HMOX1	30.62	47.7	11	64	3	0.99	0.953	0.82	1.03	1.047	1.052	0.979	1.021	0.956	1.132	0.158237	1.07	0.31024	0.945	0.047702
A0A287AWU7	Complement C3d receptor 2 OS=Sus scrofa OX=9823 GN=CR2	CR2	141.1	6.5	8	10	8	1.095	1.351	1.296	0.868	0.894	0.867	0.792	0.905	0.909	0.703	0.032981	0.696	0.0101811	0.991	0.82864
A0A287AWY5	Protocadherin gamma subfamily C, 4 OS=Sus scrofa OX=9823 GN=PCDHGC4	PCDHGC4	100.97	3.7	3	3	3	0.867	1.092	0.955	0.864	1.049	0.992	1.043	1.168	0.98	0.997	0.98408	1.095	0.33368	1.098	0.28812
A0A287AWZ8	Thyroid hormone receptor interactor 12 OS=Sus scrofa OX=9823 GN=TRIP12	TRIP12	214.3	6.9	11	13	11	0.998	0.949	1	0.947	1.047	0.927	0.998	1.001	1.037	0.991	0.8205	1.03	0.22932	1.039	0.36968
A0A287AX01	Mitogen-activated protein kinase OS=Sus scrofa OX=9823 GN=MAPK14	MAPK14	39.561	39.4	11	15	11	0.992	1.049	1.007	1.048	1.034	1.043	0.956	0.999	1.01	1.025	0.2155	0.973	0.30838	0.949	0.037557
A0A287AX05	Deoxyuridine triphosphatase OS=Sus scrofa OX=9823 GN=DUT	DUT	22.101	16.2	3	5	3	0.944	0.909	0.957	1.063	1.038	1.098	1	0.856	1.024	1.138	0.0044376	1.025	0.728	0.9	0.138983
A0A287AX76	Synapse-associated protein 1 isoform 2 OS=Sus scrofa OX=9823 GN=SYAP1	SYAP1	40.664	33.8	10	14	10	0.908	0.979	0.929	0.991	1.036	0.998	1.023	1.073	1.095	1.074	0.051681	1.133	0.014103	1.055	0.094844
A0A287AX77	Uncharacterized protein OS=Sus scrofa OX=9823 GN=PPP1R2	PPP1R2	22.652	17.6	3	4	3	0.981	0.941	1.082	1.012	0.893	0.896	1.062	1.026	1.121	0.932	0.29682	1.068	0.2409	1.146	0.04772
A0A287AX97	Collagen type XV alpha 1 chain OS=Sus scrofa OX=9823 GN=COL15A1	COL15A1	134.57	1.1	1	1	1
A0A287AXF7	Protein FAM162A OS=Sus scrofa OX=9823 GN=FAM162A	FAM162A	16.451	25.9	3	4	3	0.939	1.04	1.038	1.151	0.907	0.97	0.982	1.058	0.932	1.004	0.99676	0.985	0.77508	0.982	0.86094
A0A287AXG0	Regulator of G protein signaling 10 OS=Sus scrofa OX=9823 GN=RGS10	RGS10	21.166	18.8	3	10	3	1.102	1.028	0.998	0.968	0.982	1.017	0.952	0.924	0.993	0.949	0.18716	0.917	0.075523	0.967	0.25592
A0A287AXG3	Four and a half LIM domains 2 OS=Sus scrofa OX=9823 GN=FHL2	FHL2	32.032	39.8	10	14	10	0.978	0.935	0.932	1.07	1.022	0.988	1.01	1.009	1.047	1.083	0.046901	1.078	0.019199	0.995	0.88086
A0A287AXG6	SON DNA binding protein OS=Sus scrofa OX=9823 GN=SON	SON	249	8.8	13	15	13	1.02	1.031	0.99	1.028	1.013	0.981	0.973	1	0.983	0.994	0.74878	0.972	0.123635	0.978	0.2409
A0A287AXG8	Alpha-1,3-mannosyl-glycoprotein 4-beta-N-acetylglucosaminyltransferase A OS=Sus scrofa OX=9823 GN=MGAT4A	MGAT4A	8.3475	44.6	2	2	2
A0A287AXH8	Heterogeneous nuclear ribonucleoprotein L like OS=Sus scrofa OX=9823 GN=HNRNPLL	HNRNPLL	57.335	18.6	7	11	6	1.118	1.123	0.9	0.979	0.92	0.987	1.045	1.172	0.787	0.919	0.35412	0.956	0.72256	1.041	0.8338
A0A287AXI2	V-type proton ATPase subunit C OS=Sus scrofa OX=9823 GN=ATP6V1C1	ATP6V1C1	44.009	44.5	20	29	20	1.036	0.938	0.988	0.987	1.015	1.024	1.022	1.025	1.055	1.022	0.51268	1.047	0.198158	1.025	0.173917
A0A287AXJ5	Mitogen-activated protein kinase OS=Sus scrofa OX=9823 GN=MAPK15	MAPK15	60.075	1.4	1	1	1	1.019	0.995	1.002	0.973	0.856	0.978	1.045	1.083	1.07	0.931	0.170699	1.06	0.009835	1.139	0.042039
A0A287AXJ7	Inositol-3-phosphate synthase 1 OS=Sus scrofa OX=9823 GN=ISYNA1	ISYNA1	60.784	24.8	13	17	13	0.966	0.91	0.963	1.014	0.994	0.98	1.048	0.989	1.109	1.052	0.077596	1.108	0.056404	1.053	0.21694
A0A287AXK4	MOB kinase activator 1A OS=Sus scrofa OX=9823 GN=MOB1A	MOB1A	25.079	22.7	5	9	5	1.005	0.997	1.046	1.017	1.074	1.06	0.938	0.917	0.951	1.034	0.2083	0.921	0.0105965	0.891	0.0040795
A0A287AXL5	Transportin 3 OS=Sus scrofa OX=9823 GN=TNPO3	TNPO3	104.25	18.4	14	17	14	0.982	0.972	0.977	1.004	1.025	1.011	1.059	0.983	0.972	1.037	0.0057045	1.028	0.42058	0.991	0.75334
A0A287AXM3	N-acetylglucosamine-6-sulfatase OS=Sus scrofa OX=9823 GN=GNS	GNS	55.651	15.9	7	16	7	0.879	0.869	0.9	1.008	1.046	1.047	1.061	1.108	1.063	1.171	0.00062107	1.221	0.0003402	1.042	0.09372
A0A287AXP0	Succinate-semialdehyde dehydrogenase, mitochondrial OS=Sus scrofa OX=9823 GN=ALDH5A1	ALDH5A1	54.059	23.5	11	19	11	1.052	0.981	1.075	0.998	0.954	0.909	1.008	1.041	0.956	0.921	0.098576	0.967	0.41724	1.05	0.25054
A0A287AXP1	Cyclin-dependent kinase 2 OS=Sus scrofa OX=9823 GN=CDK2	CDK2	33.873	7.4	2	2	1	0.988	0.976	0.988	0.9	1.058	1.085	0.951	1.189	0.888	1.031	0.69062	1.026	0.86102	0.995	0.93274
A0A287AXP6	2-(3-amino-3-carboxypropyl)histidine synthase subunit 2 OS=Sus scrofa OX=9823 GN=DPH2	DPH2	51.744	3.9	1	1	1
A0A287AXP9	Collagen beta(1-O)galactosyltransferase 1 OS=Sus scrofa OX=9823 GN=COLGALT1	COLGALT1	71.747	19.9	12	18	12	0.983	0.945	0.995	1.018	1.033	0.964	1.036	1.011	1.049	1.031	0.30454	1.059	0.038457	1.027	0.32012
A0A287AXQ8	Uncharacterized protein OS=Sus scrofa OX=9823 GN=MRPL23	MRPL23	14.103	8.2	1	1	1
A0A287AXR5	14-3-3 protein zeta/delta OS=Sus scrofa OX=9823 GN=YWHAZ	YWHAZ	26.683	48.7	15	120	10	0.959	1.005	0.983	1.013	1.005	1.019	1.018	1.031	0.968	1.031	0.098715	1.024	0.37838	0.993	0.74128
A0A287AXS7	ADP/ATP translocase 3 OS=Sus scrofa OX=9823 GN=SLC25A6	SLC25A6	32.92	38.9	15	32	5	1.001	0.948	0.994	0.993	0.989	0.984	1.021	0.986	1.036	1.008	0.6866	1.034	0.21122	1.026	0.163378
A0A287AXT4	Malic enzyme OS=Sus scrofa OX=9823 GN=ME2	ME2	61.332	21.6	11	18	10	1.002	1.099	1.049	0.98	1.013	1.053	0.933	0.923	0.925	0.967	0.38042	0.883	0.043981	0.913	0.049841
A0A287AXV3	Ankyrin repeat domain 13A OS=Sus scrofa OX=9823 GN=ANKRD13A	ANKRD13A	58.551	13.2	8	14	8	0.983	1.004	1.013	0.984	1.019	0.993	1.011	0.989	1.015	0.999	0.9257	1.005	0.69882	1.006	0.65524
A0A287AXX9	Uncharacterized protein OS=Sus scrofa OX=9823	---	50.556	5.5	3	8	2
A0A287AXY4	DNL-type zinc finger OS=Sus scrofa OX=9823 GN=DNLZ	DNLZ	18.541	10.7	1	1	1	1.484	1.292	0.629	0.666	1.186	1.152	0.848	1.182	0.617	0.882	0.78738	0.777	0.53168	0.881	0.65306
A0A287AXZ4	Uncharacterized protein OS=Sus scrofa OX=9823 GN=DEPDC5	DEPDC5	172.77	0.7	1	1	1	1.221	0.952	1.165	0.918	0.842	0.948	0.728	1.26	1.01	0.811	0.071777	0.898	0.5135	1.107	0.65698
A0A287AY04	CDC42 binding protein kinase beta OS=Sus scrofa OX=9823 GN=CDC42BPB	CDC42BPB	184.21	12.2	18	21	14	1.056	0.987	0.997	0.98	1.028	0.957	0.993	0.985	1.056	0.975	0.44856	0.998	0.95036	1.023	0.49244
A0A287AY28	Cytoplasmic dynein 1 intermediate chain 2 OS=Sus scrofa OX=9823 GN=DYNC1I2	DYNC1I2	68.349	16.4	8	14	8	0.963	0.984	1.016	0.987	0.949	1.015	1.048	1.024	1.038	0.996	0.87462	1.05	0.045562	1.054	0.062601
A0A287AY31	Uncharacterized protein OS=Sus scrofa OX=9823	---	8.9241	52.6	4	6	2	1.041	1.132	1.075	0.968	1.03	1.056	0.922	0.975	0.813	0.94	0.158045	0.834	0.035984	0.887	0.110876
A0A287AY33	Uncharacterized protein OS=Sus scrofa OX=9823	---	15.819	9.8	1	1	1	1.116	0.966	0.989	1.061	0.994	1.056	0.955	1.028	0.863	1.013	0.78332	0.927	0.3204	0.915	0.172138
A0A287AY42	Calcium/calmodulin dependent protein kinase IV OS=Sus scrofa OX=9823 GN=CAMK4	CAMK4	49.79	3.5	2	3	2
A0A287AY43	Epsilon-sarcoglycan OS=Sus scrofa OX=9823 GN=SGCE	SGCE	44.797	7.4	2	2	2	1.027	0.998	0.896	0.974	1.059	1.052	1.087	0.905	1.014	1.056	0.32378	1.029	0.70464	0.974	0.66326
A0A287AY62	Arrestin domain containing 1 OS=Sus scrofa OX=9823 GN=ARRDC1	ARRDC1	41.657	2.8	1	1	1	0.966	0.983	0.861	0.975	1.064	1.002	1.034	0.984	1.144	1.082	0.177199	1.125	0.124741	1.04	0.50304
A0A287AY64	GLI pathogenesis related 2 OS=Sus scrofa OX=9823 GN=GLIPR2	GLIPR2	17.225	33.1	4	7	4	1.111	1.098	1.026	1.029	1.031	0.961	0.948	0.971	0.938	0.934	0.114002	0.883	0.009938	0.946	0.093584
A0A287AY75	Golgi membrane protein 1 OS=Sus scrofa OX=9823 GN=GOLM1	GOLM1	44.209	4.8	2	3	2	1.024	0.966	1.02	0.944	0.888	0.906	1.046	1.079	1.202	0.91	0.022038	1.105	0.0992	1.215	0.0134621
A0A287AY88	Translocation associated membrane protein 1 OS=Sus scrofa OX=9823 GN=TRAM1	TRAM1	38.662	6	1	4	1	1.061	0.938	0.861	0.978	0.954	0.999	1.111	0.98	1.092	1.025	0.67486	1.113	0.20518	1.086	0.121982
A0A287AY91	VPS33B interacting protein, apical-basolateral polarity regulator, spe-39 homolog OS=Sus scrofa OX=9823 GN=VIPAS39	VIPAS39	51.597	6.8	3	4	3	1.085	1.043	1.003	0.965	0.996	1.061	0.985	1.018	0.865	0.965	0.37682	0.916	0.1762	0.949	0.39742
A0A287AYA8	Exosome complex component RRP46 OS=Sus scrofa OX=9823 GN=EXOSC5	EXOSC5	23.931	5.4	1	2	1	1.645	1.075	0.839	0.884	0.901	0.919	0.79	0.807	1.155	0.76	0.35426	0.773	0.37112	1.018	0.98864
A0A287AYB4	Platelet-derived growth factor receptor alpha OS=Sus scrofa OX=9823 GN=PDGFRA	PDGFRA	122.77	4.4	4	6	4	0.952	0.943	0.924	0.979	0.996	0.944	1.04	1.04	1.066	1.035	0.127697	1.116	0.00080335	1.078	0.0135588
A0A287AYB6	Tyrosine-protein kinase OS=Sus scrofa OX=9823 GN=FER	FER	87.94	8.9	6	9	6	0.974	0.962	0.924	1.025	0.959	1.13	0.982	1.113	0.957	1.089	0.173578	1.067	0.27006	0.98	0.77878
A0A287AYC0	EFR3 homolog A OS=Sus scrofa OX=9823 GN=EFR3A	EFR3A	92.764	11.4	8	10	8	1.05	0.948	0.993	1.002	0.992	1.012	1.031	0.877	0.964	1.005	0.85554	0.96	0.49176	0.955	0.41874
A0A287AYC4	Uncharacterized protein OS=Sus scrofa OX=9823	---	11.245	19.2	1	1	1	1.096	1.105	0.944	1.035	1.218	0.919	0.944	0.791	0.956	1.009	0.96562	0.856	0.120365	0.848	0.188742
A0A287AYC6	Uncharacterized protein OS=Sus scrofa OX=9823 GN=LOC100626015	LOC100626015	125.59	10.2	10	15	10	0.973	0.972	1.026	1.013	1.015	0.994	1.011	0.948	1.028	1.017	0.4154	1.005	0.87556	0.988	0.65806
A0A287AYC8	Syntaxin 2 OS=Sus scrofa OX=9823 GN=STX2	STX2	27.83	9.5	2	3	2
A0A287AYD2	Tax1 binding protein 1 OS=Sus scrofa OX=9823 GN=TAX1BP1	TAX1BP1	91.463	5.3	5	5	5	0.914	1.056	1.137	1.059	0.925	1.003	1.016	0.962	0.932	0.961	0.64964	0.937	0.41842	0.974	0.61782
A0A287AYD5	Microtubule associated protein 1A OS=Sus scrofa OX=9823 GN=MAP1A	MAP1A	303.34	6.6	13	14	12	0.829	0.989	1.026	0.967	0.98	1.098	1.111	1.04	1.15	1.071	0.4103	1.161	0.102121	1.084	0.178059
A0A287AYH9	Palmitoyl-protein thioesterase 1 OS=Sus scrofa OX=9823 GN=PPT1	PPT1	34.261	8.2	3	6	3	1.093	0.993	1.003	0.703	1.017	1.214	0.95	1.082	0.967	0.95	0.66874	0.971	0.58326	1.022	0.7989
A0A287AYJ0	Dihydropyrimidinase like 3 OS=Sus scrofa OX=9823 GN=DPYSL3	DPYSL3	57.77	36	16	41	14	1.119	1.14	1.115	0.898	0.885	0.91	0.993	1.005	1.013	0.798	2.4339e-05	0.892	0.00022212	1.118	0.0003572
A0A287AYL1	Membrane palmitoylated protein 6 OS=Sus scrofa OX=9823 GN=MPP6	MPP6	61.088	10.9	5	7	5	0.96	1.215	1.02	0.988	1.161	1.206	0.81	0.734	0.904	1.05	0.619	0.766	0.046161	0.73	0.021303
A0A287AYM9	MAS related GPR family member F OS=Sus scrofa OX=9823 GN=MRGPRF	MRGPRF	38.426	4.1	1	4	1	1.003	0.979	0.938	1.072	1.005	1.037	0.98	1.048	0.96	1.066	0.075938	1.023	0.5286	0.96	0.26758
A0A287AYN8	Basonuclin 1 OS=Sus scrofa OX=9823 GN=BNC1	BNC1	92.63	1.4	1	1	1	1.092	1.011	0.998	0.958	1.022	0.991	0.954	1.006	0.988	0.958	0.27742	0.951	0.194304	0.992	0.7684
A0A287AYP1	Nipsnap homolog 3B OS=Sus scrofa OX=9823 GN=NIPSNAP3B	NIPSNAP3B	28.494	39.7	8	21	7	1.016	0.969	0.994	0.926	1.015	1.062	0.988	1.012	1.061	1.008	0.88432	1.028	0.34276	1.019	0.67806
A0A287AYQ0	ATP binding cassette subfamily A member 7 OS=Sus scrofa OX=9823 GN=ABCA7	ABCA7	238.19	0.5	1	1	1	1.057	0.975	1.032	1.22	1.048	0.997	0.859	0.907	0.925	1.066	0.40726	0.878	0.0164357	0.824	0.042302
A0A287AYR3	UHRF1 binding protein 1 like OS=Sus scrofa OX=9823 GN=UHRF1BP1L	UHRF1BP1L	135.87	0.8	1	1	1
A0A287AYU1	Metastasis associated 1 family member 2 OS=Sus scrofa OX=9823 GN=MTA2	MTA2	69.798	21.5	12	15	11	0.962	1.044	1.043	1.059	1.007	1.027	0.983	0.963	0.912	1.014	0.65524	0.937	0.140539	0.924	0.041302
A0A287AYU8	Uncharacterized protein OS=Sus scrofa OX=9823 GN=CD300LF	CD300LF	32.898	33.4	11	21	8	1.042	1.135	1.076	0.834	0.908	0.82	1.042	1.109	1.061	0.788	0.004003	0.987	0.70996	1.254	0.0034401
A0A287AYV8	Uncharacterized protein OS=Sus scrofa OX=9823	---	11.282	32.7	3	11	0
A0A287AYW6	Translin OS=Sus scrofa OX=9823 GN=TSN	TSN	23.675	37.9	9	15	9	1.05	1.097	1.009	1.029	1.026	0.975	0.943	0.929	0.955	0.96	0.24638	0.896	0.0125608	0.933	0.022902
A0A287AYY7	Leucine rich repeat containing 47 OS=Sus scrofa OX=9823 GN=LRRC47	LRRC47	63.95	16.3	10	16	10	1.212	1.134	1.027	0.946	0.962	0.924	0.968	0.936	0.914	0.84	0.025201	0.835	0.025103	0.995	0.81452
A0A287AYY9	NSF attachment protein gamma OS=Sus scrofa OX=9823 GN=NAPG	NAPG	34.858	37.3	10	14	10	1.064	1.064	1.019	0.968	0.982	1.002	0.956	0.981	1.01	0.938	0.021959	0.936	0.037456	0.998	0.92634
A0A287AYZ7	3'(2'), 5'-bisphosphate nucleotidase 1 OS=Sus scrofa OX=9823 GN=BPNT1	BPNT1	33.43	34.7	9	12	9	1.001	0.966	1.071	0.96	1.031	0.996	1.025	1.002	0.983	0.983	0.67674	0.991	0.80742	1.008	0.75604
A0A287AZ54	Pyridoxal phosphatase OS=Sus scrofa OX=9823 GN=PDXP	PDXP	31.936	14.5	3	3	3	0.859	0.83	1.194	1.083	1.114	1.078	0.979	1.11	0.762	1.136	0.34866	0.989	0.95686	0.871	0.30812
A0A287AZ57	Nucleoporin 62 OS=Sus scrofa OX=9823 GN=NUP62	NUP62	49.124	14.4	5	8	5	1.156	1.02	1.05	0.921	1.05	1.012	0.917	0.998	0.89	0.925	0.22276	0.869	0.052255	0.94	0.30414
A0A287AZ68	Scribbled planar cell polarity protein OS=Sus scrofa OX=9823 GN=SCRIB	SCRIB	171.42	9.8	9	10	8	0.908	0.931	1.019	0.994	0.999	1.128	1.011	1.006	1.015	1.092	0.181516	1.061	0.22798	0.971	0.5788
A0A287AZ79	AP complex subunit beta OS=Sus scrofa OX=9823 GN=AP2B1	AP2B1	104.54	20.8	20	58	6	1.074	1.013	1.031	0.966	0.988	1.015	0.97	0.992	0.956	0.952	0.095198	0.936	0.031582	0.983	0.38992
A0A287AZ87	Transcriptional regulator ERG OS=Sus scrofa OX=9823 GN=ERG	ERG	51.238	2.6	1	1	1
A0A287AZ99	Glutathione S-transferase mu 2 OS=Sus scrofa OX=9823 GN=LOC110260348	LOC110260348	28.623	49.6	12	27	1
A0A287AZA3	COP9 signalosome complex subunit 3 OS=Sus scrofa OX=9823 GN=COPS3	COPS3	40.354	23	7	11	7	0.955	0.969	1.021	1.028	1.014	1.027	0.977	1	0.973	1.042	0.115437	1.002	0.93068	0.961	0.0145552
A0A287AZA7	Ribosomal protein S27a OS=Sus scrofa OX=9823 GN=RPS27A	RPS27A	17.965	44.2	7	83	2	1.142	1.022	1.019	1.011	0.954	0.95	0.939	0.982	0.949	0.916	0.110503	0.902	0.062279	0.985	0.56076
A0A287AZD8	BCL2 like 13 OS=Sus scrofa OX=9823 GN=BCL2L13	BCL2L13	49.888	17.7	7	8	7	0.941	0.998	0.988	0.971	0.949	0.983	0.985	1.05	1.019	0.992	0.72078	1.043	0.176382	1.052	0.07542
A0A287AZF9	Cytochrome c1 OS=Sus scrofa OX=9823 GN=CYC1	CYC1	35.442	20.6	6	15	6	1.116	1.049	1.028	1	1.004	0.95	0.902	0.954	0.984	0.925	0.06364	0.889	0.029856	0.961	0.27056
A0A287AZG0	Rho GTPase activating protein 1 OS=Sus scrofa OX=9823 GN=ARHGAP1	ARHGAP1	50.438	29.2	14	30	14	0.984	1.01	1.018	0.971	0.971	0.947	1.063	1.021	1.015	0.959	0.034525	1.029	0.185856	1.073	0.0138994
A0A287AZG6	Vacuolar protein sorting 13 homolog C OS=Sus scrofa OX=9823 GN=VPS13C	VPS13C	417.88	7.6	25	26	25	1.058	1.046	1.023	0.96	1.009	0.902	0.988	1.012	1.006	0.918	0.063459	0.961	0.032204	1.047	0.23048
A0A287AZH1	Nucleosome assembly protein 1-like 4 OS=Sus scrofa OX=9823 GN=NAP1L4	NAP1L4	42.602	27.2	8	12	7	0.965	1.024	0.954	0.958	0.985	1.012	1.03	0.981	1.052	1.004	0.88134	1.041	0.25516	1.037	0.24222
A0A287AZJ2	COMM domain-containing protein 10 OS=Sus scrofa OX=9823 GN=COMMD10	COMMD10	22.152	14.5	3	4	3	1.203	1.145	1.078	0.938	1.079	0.969	0.892	0.895	0.893	0.872	0.059143	0.782	0.0164231	0.898	0.128637
A0A287AZJ6	A-kinase anchoring protein 8 OS=Sus scrofa OX=9823 GN=AKAP8	AKAP8	74.024	2.4	2	4	2	1.119	1.032	0.974	0.967	1.015	0.963	0.99	1.032	0.93	0.942	0.2547	0.945	0.32654	1.002	0.96214
A0A287AZK8	MYC associated factor X OS=Sus scrofa OX=9823 GN=MAX	MAX	18.275	19.4	3	4	3	1.028	0.988	1.081	1.005	1.08	0.928	0.834	0.992	1.013	0.973	0.60292	0.917	0.24958	0.942	0.46304
A0A287AZM3	UBX domain protein 1 OS=Sus scrofa OX=9823 GN=UBXN1	UBXN1	29.731	30.9	6	7	6	0.955	1.167	0.948	1.029	0.897	0.946	1.109	1.026	0.925	0.936	0.46604	0.997	0.98888	1.065	0.39902
A0A287AZN3	ER membrane protein complex subunit 2 OS=Sus scrofa OX=9823 GN=EMC2	EMC2	33.151	12.4	3	3	3	0.896	0.807	0.963	1.025	1.106	1.047	1.139	0.957	1.069	1.192	0.033864	1.187	0.076375	0.996	0.91738
A0A287AZP9	Proline rich coiled-coil 2C OS=Sus scrofa OX=9823 GN=PRRC2C	PRRC2C	308.69	10.1	22	27	22	0.963	0.99	0.994	0.958	0.942	1.032	1.019	0.985	1.014	0.995	0.85502	1.024	0.176959	1.029	0.37934
A0A287AZQ4	Ataxin 7 like 3B OS=Sus scrofa OX=9823 GN=ATXN7L3B	ATXN7L3B	10.761	30.9	2	2	2	1.025	1.05	0.977	1.022	0.947	1.03	1.01	0.987	0.969	0.983	0.63012	0.972	0.30982	0.989	0.73876
A0A287AZQ5	TNF alpha induced protein 2 OS=Sus scrofa OX=9823 GN=TNFAIP2	TNFAIP2	77.659	13.6	9	10	9	0.997	1.057	1.111	0.961	1.008	1.086	0.82	0.953	1.018	0.965	0.49346	0.882	0.144843	0.914	0.27228
A0A287AZS0	Promyelocytic leukemia OS=Sus scrofa OX=9823 GN=PML	PML	92.04	28.7	23	33	23	1.039	1.039	1	1.027	1.058	1.049	0.947	0.965	0.945	1.018	0.3079	0.928	0.0066434	0.912	0.00111988
A0A287AZT6	AT-rich interaction domain 4B OS=Sus scrofa OX=9823 GN=ARID4B	ARID4B	44.837	5.7	2	2	2	1.351	1.089	0.827	1.009	0.958	1.26	0.971	0.716	0.849	0.988	0.99848	0.776	0.22264	0.786	0.118459
A0A287AZV4	S-(hydroxymethyl)glutathione dehydrogenase OS=Sus scrofa OX=9823 GN=ADH5	ADH5	38.801	31.7	11	19	11	1.057	1.046	1.003	1	0.984	0.982	0.992	0.945	0.939	0.955	0.054298	0.926	0.03106	0.97	0.164025
A0A287AZV7	NADH dehydrogenase [ubiquinone] 1 subunit C2 OS=Sus scrofa OX=9823 GN=NDUFC2	NDUFC2	14.306	34.4	4	6	4	0.996	0.96	0.979	1.048	1.096	1.067	0.878	0.993	1.089	1.094	0.0059031	1.009	0.94404	0.922	0.2527
A0A287AZW1	Uncharacterized protein OS=Sus scrofa OX=9823 GN=WASHC3	WASHC3	21.444	11.3	2	4	2
A0A287AZW8	Mitogen-activated protein kinase kinase kinase kinase OS=Sus scrofa OX=9823 GN=MAP4K1	MAP4K1	87.278	10.4	7	7	7	1.14	1.009	0.911	1.019	1.004	1.002	0.956	1.111	0.952	0.989	0.92064	0.987	0.89208	0.998	0.93672
A0A287AZX0	TBC1 domain family member 10B OS=Sus scrofa OX=9823 GN=TBC1D10B	TBC1D10B	74.467	7.2	4	6	4	1.136	0.983	0.944	1.086	0.974	0.989	0.953	1.059	0.963	0.995	0.97092	0.971	0.70022	0.976	0.63464
A0A287AZY0	Mitochondrial calcium uptake 2 OS=Sus scrofa OX=9823 GN=MICU2	MICU2	45.847	5.5	2	2	2	1.026	0.952	0.942	0.989	1.05	0.953	0.926	1.07	1.115	1.025	0.5671	1.065	0.3839	1.04	0.59164
A0A287AZY6	TNF alpha induced protein 8 like 1 OS=Sus scrofa OX=9823 GN=TNFAIP8L1	TNFAIP8L1	20.747	5.9	1	1	1
A0A287AZZ7	Calcineurin binding protein 1 OS=Sus scrofa OX=9823 GN=CABIN1	CABIN1	207.34	1	2	2	2	0.979	1.008	0.939	0.989	0.806	0.981	1.265	0.998	1.048	0.949	0.4642	1.132	0.189277	1.193	0.149677
A0A287B011	Zinc and ring finger 2 OS=Sus scrofa OX=9823 GN=ZNRF2	ZNRF2	23.979	24.1	3	3	3	1.046	1.05	0.984	0.953	0.858	0.957	1.09	1.108	0.977	0.899	0.060282	1.031	0.54864	1.147	0.061925
A0A287B017	DNA methyltransferase 1-associated protein 1 OS=Sus scrofa OX=9823 GN=DMAP1	DMAP1	53.147	5.6	2	2	2	0.925	1.012	0.989	0.904	1.152	0.958	1.072	0.991	1.002	1.03	0.76506	1.048	0.27108	1.017	0.7932
A0A287B024	Glia maturation factor gamma OS=Sus scrofa OX=9823 GN=GMFG	GMFG	16.784	40.1	5	11	4	0.939	0.978	0.977	1.043	1.06	1.097	1.024	0.922	1.019	1.106	0.0073997	1.025	0.56084	0.927	0.10716
A0A287B030	NmrA like redox sensor 1 OS=Sus scrofa OX=9823 GN=NMRAL1	NMRAL1	33.097	10.4	3	4	3	0.851	0.893	1.009	0.933	1.043	0.915	1.17	1.065	1.126	1.05	0.48646	1.221	0.024925	1.163	0.036625
A0A287B053	BCL6 corepressor like 1 OS=Sus scrofa OX=9823 GN=BCORL1	BCORL1	165.26	0.6	1	1	1	0.997	0.973	0.959	0.927	0.935	1.081	1.028	1.112	1.009	1.005	0.96522	1.075	0.087777	1.07	0.29878
A0A287B056	Oxysterols receptor LXR-alpha OS=Sus scrofa OX=9823 GN=NR1H3	NR1H3	42.36	3.1	1	1	1
A0A287B077	Sterile alpha motif domain containing 4A OS=Sus scrofa OX=9823 GN=SAMD4A	SAMD4A	69.998	1.9	1	1	1
A0A287B088	Proteasome subunit beta OS=Sus scrofa OX=9823 GN=PSMB4	PSMB4	29.053	20.5	4	12	4	0.942	0.997	1.001	1.038	1.034	1.044	0.999	0.962	0.995	1.06	0.098084	1.005	0.81734	0.949	0.0126424
A0A287B0H2	RNA pseudouridylate synthase domain containing 2 OS=Sus scrofa OX=9823 GN=RPUSD2	RPUSD2	60.306	1.7	1	1	1	0.894	1.012	1.037	1.144	0.986	0.969	0.901	0.951	1.114	1.053	0.50674	1.008	0.94512	0.957	0.61382
A0A287B0I3	Rho GDP-dissociation inhibitor 2 OS=Sus scrofa OX=9823 GN=ARHGDIB	ARHGDIB	22.848	47.5	8	25	8	0.997	1.062	1.034	0.984	1.024	0.955	0.977	1.011	0.948	0.958	0.189779	0.949	0.11646	0.991	0.75716
A0A287B0I4	ADP-ribosylation factor-like protein 8B OS=Sus scrofa OX=9823 GN=ARL8B	ARL8B	21.554	18.8	4	13	3	0.993	0.978	0.956	1.013	0.963	1.053	0.943	1.027	1.106	1.035	0.29682	1.051	0.37128	1.016	0.8048
A0A287B0I6	Vitamin K epoxide reductase complex subunit 1 OS=Sus scrofa OX=9823 GN=VKORC1	VKORC1	18.139	12.9	2	4	2	0.958	0.956	0.997	1.024	1.05	1.005	1.015	1.019	0.989	1.058	0.039525	1.038	0.084363	0.982	0.311
A0A287B0J2	CDC42 effector protein 5 OS=Sus scrofa OX=9823 GN=CDC42EP5	CDC42EP5	14.879	17.9	3	4	3	0.847	0.848	0.956	0.988	1.073	0.915	1.144	1.009	1.225	1.123	0.132342	1.274	0.025783	1.135	0.160775
A0A287B0J4	DNA dC->dU-editing enzyme APOBEC-3B OS=Sus scrofa OX=9823 GN=APOBEC3B	APOBEC3B	28.676	20.2	5	6	5	1.011	0.993	0.97	0.997	1.007	1.019	0.984	0.965	0.998	1.016	0.29146	0.991	0.58862	0.975	0.092898
A0A287B0L1	Sphingosine-1-phosphate phosphatase 1 OS=Sus scrofa OX=9823 GN=SGPP1	SGPP1	45.632	7.3	2	2	2
A0A287B0L4	Zinc finger ZZ-type and EF-hand domain containing 1 OS=Sus scrofa OX=9823 GN=ZZEF1	ZZEF1	320.55	2.5	6	6	6	0.968	1.008	1.068	0.896	1.003	0.945	0.967	1.07	1.088	0.934	0.190376	1.027	0.61008	1.099	0.128701
A0A287B0L6	Histone H2A OS=Sus scrofa OX=9823 GN=LOC110261668	LOC110261668	13.906	23.4	4	11	1	1.01	1.041	1.023	1.002	1.01	1.01	0.954	1.02	0.946	0.983	0.137002	0.95	0.110424	0.966	0.28272
A0A287B0M8	GPN-loop GTPase 1 OS=Sus scrofa OX=9823 GN=GPN1	GPN1	41.445	2.9	1	2	1	0.989	1.124	1.037	0.905	1.025	0.971	0.94	0.891	1.122	0.921	0.188278	0.937	0.4374	1.018	0.8658
A0A287B0M9	Suppressor of IKBKE 1 OS=Sus scrofa OX=9823 GN=SIKE1	SIKE1	21.493	4.8	1	2	1
A0A287B0N7	Nucleolar protein 3 OS=Sus scrofa OX=9823 GN=NOL3	NOL3	25.865	8	1	1	1	1.062	1.007	0.889	0.882	1.261	0.871	0.972	1.154	0.924	1.019	0.96456	1.031	0.75322	1.012	0.87888
A0A287B0P0	Phenylalanyl-tRNA synthetase 2, mitochondrial OS=Sus scrofa OX=9823 GN=FARS2	FARS2	35.158	9.6	3	3	3	1.013	1.192	1.024	1.186	0.866	1.017	0.948	0.925	0.844	0.95	0.6203	0.841	0.054001	0.885	0.3038
A0A287B0P3	Chromosome 11 open reading frame 96 OS=Sus scrofa OX=9823 GN=C11orf96	C11orf96	25.061	7.1	2	3	2	0.935	0.931	0.944	0.974	0.92	0.884	1.142	1.108	1.179	0.989	0.70898	1.22	0.00041796	1.234	0.0031989
A0A287B0Q6	Dynamin 1 like OS=Sus scrofa OX=9823 GN=DNM1L	DNM1L	78.084	26.5	18	24	1	1.167	1.165	0.726	0.816	1.139	1.146	0.953	0.96	0.954	1.014	0.9021	0.938	0.81946	0.925	0.61414
A0A287B0R3	CAP-Gly domain containing linker protein 1 OS=Sus scrofa OX=9823 GN=CLIP1	CLIP1	156.09	24.7	32	42	3	1.286	0.895	0.951	0.715	1.655	1.116	0.811	0.815	0.773	1.113	0.82628	0.766	0.154361	0.688	0.32254
A0A287B0S5	Serine/threonine-protein phosphatase 2A 56 kDa regulatory subunit OS=Sus scrofa OX=9823 GN=PPP2R5A	PPP2R5A	56.315	20	10	13	10	1.006	0.978	0.969	1.045	1.011	0.984	0.99	1.005	1.028	1.029	0.23616	1.024	0.21008	0.994	0.80482
A0A287B0T0	Ring finger protein 115 OS=Sus scrofa OX=9823 GN=RNF115	RNF115	32.414	7.2	1	1	1
A0A287B0V1	Tripartite motif containing 14 OS=Sus scrofa OX=9823 GN=TRIM14	TRIM14	49.942	5.8	2	2	2	0.992	1.04	0.986	0.944	1.004	0.952	1.022	0.985	1.087	0.961	0.193642	1.025	0.50578	1.067	0.136785
A0A287B0X3	PHD finger protein 11 OS=Sus scrofa OX=9823 GN=PHF11	PHF11	32.659	18.4	6	7	6	0.891	0.987	1.037	1.029	1.029	1.035	1.06	1.006	0.932	1.061	0.30436	1.028	0.64844	0.969	0.47568
A0A287B0Y9	Ras-related protein Rab-35 OS=Sus scrofa OX=9823 GN=RAB35	RAB35	21.231	31.5	7	15	6	0.992	1.087	0.97	1.001	1.038	1.011	1.014	1.005	0.959	1	0.9705	0.977	0.59176	0.976	0.30354
A0A287B0Z7	Complement C1q subcomponent subunit A OS=Sus scrofa OX=9823 GN=C1QA	C1QA	26.365	25.2	5	6	5	0.974	0.998	0.93	0.924	0.965	0.972	1.06	1.078	1.101	0.986	0.6182	1.116	0.0092848	1.132	0.0029649
A0A287B0Z8	Indolethylamine N-methyltransferase OS=Sus scrofa OX=9823 GN=INMT	INMT	29.426	15.6	3	3	3	1.033	1.031	1.082	0.965	0.919	0.847	0.982	1.076	1.028	0.868	0.025738	0.981	0.55654	1.13	0.056659
A0A287B110	Tissue specific transplantation antigen P35B OS=Sus scrofa OX=9823 GN=TSTA3	TSTA3	36.156	10	3	3	3	1.035	1.029	0.983	0.934	0.956	0.986	1.037	1.026	1.024	0.944	0.063178	1.013	0.47226	1.073	0.011764
A0A287B139	Atypical chemokine receptor 1 OS=Sus scrofa OX=9823 GN=ACKR1	ACKR1	40.164	2.9	1	1	1
A0A287B141	Spermatid perinuclear RNA binding protein OS=Sus scrofa OX=9823 GN=STRBP	STRBP	70.713	9.4	7	12	3	0.951	1.061	1.092	0.992	1.018	0.927	1.017	0.97	0.976	0.946	0.34282	0.955	0.37098	1.009	0.78184
A0A287B147	ER membrane protein complex subunit 10 OS=Sus scrofa OX=9823 GN=EMC10	EMC10	26.909	7.1	2	3	2	1.032	0.978	0.974	0.985	0.896	1.012	1.009	1.06	1.078	0.97	0.48256	1.055	0.122679	1.088	0.112084
A0A287B150	LLGL2, scribble cell polarity complex component OS=Sus scrofa OX=9823 GN=LLGL2	LLGL2	116.51	1.4	1	1	1	1.948	1.349	0.818	0.608	1.032	0.847	0.822	0.676	0.953	0.604	0.189543	0.596	0.159242	0.986	0.99512
A0A287B167	Uncharacterized protein OS=Sus scrofa OX=9823 GN=PARL	PARL	45.833	4.9	1	1	1	0.739	0.951	1.173	0.819	1.349	1.04	0.977	1.196	0.752	1.121	0.6033	1.022	0.91598	0.912	0.67346
A0A287B168	A-kinase anchoring protein 8 like OS=Sus scrofa OX=9823 GN=AKAP8L	AKAP8L	59.38	7.7	3	4	3	1.052	1.08	0.996	0.972	0.948	0.966	0.98	1.035	0.99	0.923	0.032905	0.961	0.24362	1.041	0.094044
A0A287B182	Transmembrane protein 263 OS=Sus scrofa OX=9823 GN=TMEM263	TMEM263	11.691	31.9	3	7	3	0.998	1.011	1.017	1.074	0.994	0.943	0.992	0.961	1.022	0.995	0.88284	0.983	0.40588	0.988	0.8067
A0A287B187	Autophagy protein 5 OS=Sus scrofa OX=9823 GN=ATG5	ATG5	28.767	20.1	4	5	4	1.056	0.982	1.041	0.917	1.001	0.912	0.922	1.001	1.056	0.919	0.08648	0.968	0.49366	1.053	0.3653
A0A287B1D3	Phosphodiesterase OS=Sus scrofa OX=9823 GN=PDE2A	PDE2A	101.12	5.1	3	3	3	1.026	0.951	1.006	0.914	1.148	0.979	1.041	0.9	1.042	1.019	0.84194	1	0.97466	0.981	0.84838
A0A287B1D4	STT3B, catalytic subunit of the oligosaccharyltransferase complex OS=Sus scrofa OX=9823 GN=STT3B	STT3B	77.771	8.5	6	9	6	0.998	0.981	0.957	1.042	1.002	1.026	0.995	0.99	0.991	1.046	0.0553	1.014	0.38104	0.969	0.114415
A0A287B1F7	ATP binding cassette subfamily C member 9 OS=Sus scrofa OX=9823 GN=ABCC9	ABCC9	172.78	0.7	1	1	1
A0A287B1F8	Kinesin family member 1B OS=Sus scrofa OX=9823 GN=KIF1B	KIF1B	130.31	4.1	4	4	3	0.789	1.029	1.055	0.974	1.036	0.973	0.998	0.987	1.156	1.038	0.65778	1.093	0.4212	1.053	0.41978
A0A287B1I4	Dynactin subunit 1 OS=Sus scrofa OX=9823 GN=DCTN1	DCTN1	138.42	30.1	30	49	30	1.004	1.026	1.002	0.982	0.994	1.002	1.007	1.001	0.987	0.982	0.134337	0.988	0.27224	1.006	0.53288
A0A287B1J4	Spectrin alpha, non-erythrocytic 1 OS=Sus scrofa OX=9823 GN=SPTAN1	SPTAN1	271.47	43.6	99	198	1	1.069	1.096	1.108	0.961	0.86	0.941	0.979	1.019	0.984	0.844	0.0087212	0.911	0.0048011	1.08	0.099285
A0A287B1J9	Neurobeachin OS=Sus scrofa OX=9823 GN=NBEA	NBEA	326.95	2.9	6	7	5	1.12	0.998	0.969	0.948	0.883	0.999	1.039	1.078	1.125	0.917	0.20392	1.05	0.36846	1.146	0.032441
A0A287B1L5	Opioid growth factor receptor OS=Sus scrofa OX=9823 GN=OGFR	OGFR	59.726	9.5	3	5	3	0.922	1.127	0.969	0.996	1.15	1.043	0.894	0.839	0.905	1.057	0.48278	0.874	0.112323	0.827	0.0177011
A0A287B1M7	C-X3-C motif chemokine ligand 1 OS=Sus scrofa OX=9823 GN=CX3CL1	CX3CL1	28.411	3.8	1	1	1
A0A287B1N0	Uncharacterized protein OS=Sus scrofa OX=9823	---	29.751	3	1	1	1	1.061	0.988	1.031	1.007	1.022	1.073	0.929	1.006	0.905	1.007	0.81184	0.922	0.097685	0.916	0.074924
A0A287B1P1	Integrin subunit alpha X OS=Sus scrofa OX=9823 GN=ITGAX	ITGAX	127.04	15.2	15	30	0
A0A287B1R6	Uncharacterized protein OS=Sus scrofa OX=9823 GN=ARMC8	ARMC8	66.059	6.8	4	4	4	0.916	0.933	1.001	0.994	0.986	1.036	1.059	0.982	1.103	1.058	0.139979	1.103	0.087763	1.042	0.3374
A0A287B1T2	EH domain containing 3 OS=Sus scrofa OX=9823 GN=EHD3	EHD3	61.03	31.2	16	34	9	0.947	0.969	0.903	1.001	1.02	1.018	1.02	1.06	1.035	1.078	0.025003	1.105	0.0132371	1.025	0.1247
A0A287B1U5	Uncharacterized protein OS=Sus scrofa OX=9823 GN=COMMD7	COMMD7	22.61	9.5	2	4	2	0.945	0.939	1.001	1.032	0.998	0.973	1.076	1.06	1.088	1.041	0.20426	1.118	0.0068003	1.074	0.0187633
A0A287B1V1	Acyl-CoA dehydrogenase short/branched chain OS=Sus scrofa OX=9823 GN=ACADSB	ACADSB	47.26	23	8	17	8	1.003	1.067	1.012	0.988	1.041	1.007	0.948	1.003	0.927	0.985	0.57766	0.934	0.086578	0.948	0.127003
A0A287B1V8	Nucleoporin 133 OS=Sus scrofa OX=9823 GN=NUP133	NUP133	117.94	11.1	9	12	9	1.015	0.982	1.007	0.992	0.987	0.983	1.004	0.923	1.042	0.986	0.24626	0.988	0.74648	1.002	0.97856
A0A287B1X5	Uncharacterized protein OS=Sus scrofa OX=9823 GN=TPD52L2	TPD52L2	21.845	43.6	9	20	9	0.959	0.958	0.968	0.948	0.978	0.994	1.033	1.079	1.126	1.012	0.45262	1.122	0.044622	1.109	0.022524
A0A287B1Y2	Glutathione S-transferase mu 2 OS=Sus scrofa OX=9823 GN=LOC110260348	LOC110260348	25.658	56	13	29	0
A0A287B1Y7	GMP reductase OS=Sus scrofa OX=9823 GN=GMPR2	GMPR2	33.495	26.6	8	13	6	0.992	1.022	1.07	0.946	1.123	1.034	0.987	1.017	0.922	1.006	0.94224	0.949	0.21974	0.943	0.37598
A0A287B207	Ubiquitin conjugating enzyme E2 R2 OS=Sus scrofa OX=9823 GN=UBE2R2	UBE2R2	27.166	4.6	1	1	1
A0A287B226	ARL2-SNX15 readthrough (NMD candidate) OS=Sus scrofa OX=9823 GN=ARL2-SNX15	ARL2-SNX15	23.936	28	5	6	5	1.086	1.056	1.012	0.949	0.937	1.04	0.933	0.965	0.999	0.928	0.122298	0.919	0.040541	0.99	0.82094
A0A287B238	NIF3-like protein 1 OS=Sus scrofa OX=9823 GN=NIF3L1	NIF3L1	39.038	8	3	4	3	0.998	1.064	1.039	0.963	1.001	0.999	1.063	0.912	0.967	0.955	0.114518	0.949	0.3247	0.993	0.85624
A0A287B242	Uncharacterized protein OS=Sus scrofa OX=9823 GN=FLNA	FLNA	234.37	51.2	96	397	1	0.833	0.766	0.803	1.211	0.897	1.091	1.106	1.066	1.248	1.332	0.037558	1.424	0.0027604	1.069	0.5108
A0A287B249	Uncharacterized protein OS=Sus scrofa OX=9823	---	11.415	8.1	1	1	1	1.034	0.958	1.049	0.953	1.05	0.971	1.172	0.89	0.93	0.978	0.61346	0.984	0.81132	1.006	0.99554
A0A287B253	Uncharacterized protein OS=Sus scrofa OX=9823 GN=PCP4L1	PCP4L1	7.4752	32.4	2	7	2	1.021	1	0.995	0.975	1.002	0.939	1.03	1.024	1.079	0.967	0.171038	1.039	0.107998	1.074	0.045621
A0A287B270	Poly(A)-specific ribonuclease OS=Sus scrofa OX=9823 GN=PARN	PARN	78.043	9.9	7	7	7	0.958	0.985	1.048	0.984	1.007	0.978	1.024	0.999	1	0.993	0.8212	1.011	0.705	1.018	0.20774
A0A287B276	AT-rich interaction domain 1B OS=Sus scrofa OX=9823 GN=ARID1B	ARID1B	192	4.9	7	10	7	0.943	1.023	0.974	0.972	0.883	1.035	1.042	1.053	1.091	0.983	0.73666	1.084	0.042362	1.102	0.108244
A0A287B278	Annexin OS=Sus scrofa OX=9823 GN=ANXA4	ANXA4	35.669	37.7	12	31	11	0.916	0.937	0.918	1.078	1.035	1.126	0.979	1.008	0.996	1.169	0.003597	1.077	0.0026991	0.921	0.03368
A0A287B283	LanC like 1 OS=Sus scrofa OX=9823 GN=LANCL1	LANCL1	45.384	16.5	6	9	6	1.07	1.084	1.016	1.039	1.011	1.029	0.905	0.937	0.927	0.971	0.2485	0.874	0.0037592	0.899	0.00123548
A0A287B292	Poly(ADP-ribose) polymerase family member 9 OS=Sus scrofa OX=9823 GN=PARP9	PARP9	88.522	9.7	6	8	6	1.014	0.968	1.094	1.019	1.079	1.079	0.861	0.897	1	1.033	0.4575	0.897	0.126922	0.868	0.042102
A0A287B299	RB1 inducible coiled-coil 1 OS=Sus scrofa OX=9823 GN=RB1CC1	RB1CC1	164	2.3	3	3	3	1.067	0.968	1.004	1.02	0.966	0.958	1.007	1.036	0.995	0.969	0.4156	1	0.9918	1.032	0.24088
A0A287B2A5	Peroxisomal biogenesis factor 5 OS=Sus scrofa OX=9823 GN=PEX5	PEX5	57.591	2.3	1	1	1
A0A287B2B8	Matrix remodeling associated 7 OS=Sus scrofa OX=9823 GN=MXRA7	MXRA7	20.426	20.1	3	3	3	1.099	1.016	0.915	1.052	1.084	0.995	0.924	0.957	0.979	1.033	0.58354	0.944	0.37742	0.913	0.04054
A0A287B2D3	BRCA1 associated ATM activator 1 OS=Sus scrofa OX=9823 GN=BRAT1	BRAT1	81.61	4.2	3	4	3	1.362	1.271	1.12	0.873	1.062	1.09	0.813	0.639	0.926	0.806	0.074358	0.634	0.0193981	0.786	0.128217
A0A287B2F5	Uncharacterized protein OS=Sus scrofa OX=9823	---	19.43	9	1	3	1	1.164	1.041	1.168	0.869	0.812	0.838	1	1.105	1.027	0.747	0.0024013	0.929	0.2012	1.243	0.0036835
A0A287B2G4	GCN1, eIF2 alpha kinase activator homolog OS=Sus scrofa OX=9823 GN=GCN1	GCN1	288.13	16.4	37	56	3	1.007	1.037	1.007	1.078	1.144	1.153	0.866	0.817	0.9	1.106	0.0126351	0.847	0.0049416	0.765	0.00160461
A0A287B2G5	RAB7B, member RAS oncogene family OS=Sus scrofa OX=9823 GN=RAB7B	RAB7B	22.649	15	3	3	3
A0A287B2I2	Striatin interacting protein 1 OS=Sus scrofa OX=9823 GN=STRIP1	STRIP1	85.466	7.3	5	5	5	1.067	1.012	1.098	1.017	1.017	0.936	1.028	0.846	0.987	0.935	0.138242	0.901	0.167677	0.963	0.5734
A0A287B2I4	Arginine and serine rich coiled-coil 2 OS=Sus scrofa OX=9823 GN=RSRC2	RSRC2	50.648	2.3	1	1	1	1.086	1.132	1.22	0.992	0.852	0.996	0.861	0.879	0.991	0.826	0.035436	0.794	0.0141207	0.962	0.5993
A0A287B2K4	Neuropilin OS=Sus scrofa OX=9823 GN=NRP2	NRP2	100.91	7.9	7	8	7	1.175	1.002	1.093	0.983	0.956	0.983	0.944	0.949	0.906	0.894	0.078299	0.856	0.033555	0.958	0.067756
A0A287B2K6	LIM domain-containing protein 2 OS=Sus scrofa OX=9823 GN=LIMD2	LIMD2	14.191	26.6	4	7	3	1.15	1.083	1.115	0.983	1.067	0.943	0.936	0.847	0.887	0.894	0.048202	0.797	0.0025356	0.892	0.070305
A0A287B2K8	KN motif and ankyrin repeat domains 2 OS=Sus scrofa OX=9823 GN=KANK2	KANK2	93.671	22.6	18	26	18	1.002	1.015	0.991	0.992	0.976	0.987	1.001	1.009	1.021	0.982	0.102695	1.008	0.4438	1.026	0.027563
A0A287B2L1	PTPRF interacting protein alpha 1 OS=Sus scrofa OX=9823 GN=PPFIA1	PPFIA1	132.53	11.3	11	13	7	1.006	1.006	0.984	0.942	0.999	0.996	0.964	1.075	1.013	0.98	0.37974	1.019	0.61576	1.039	0.36314
A0A287B2M3	40S ribosomal protein SA OS=Sus scrofa OX=9823 GN=RPSA	RPSA	30.707	37.1	8	27	8	0.948	0.976	1.01	1.012	1.022	1.046	0.983	1	0.956	1.05	0.078484	1.002	0.93792	0.954	0.045577
A0A287B2P1	Chloride intracellular channel protein OS=Sus scrofa OX=9823 GN=CLIC1	CLIC1	26.977	60.6	9	44	9	1.003	0.988	0.981	0.998	0.995	0.993	1.025	1.014	1.015	1.005	0.51826	1.028	0.021075	1.023	0.0038409
A0A287B2T0	Huntingtin OS=Sus scrofa OX=9823 GN=HTT	HTT	331.93	6.4	15	15	15	1.131	0.994	1.005	1.012	1.033	0.967	0.899	0.938	0.996	0.962	0.4627	0.905	0.124117	0.941	0.157283
A0A287B2T5	Platelet glycoprotein 4 OS=Sus scrofa OX=9823 GN=CD36	CD36	43.33	13.7	5	11	5	0.961	0.999	1.071	1.051	1.003	0.994	0.949	1.002	0.982	1.006	0.8699	0.968	0.4163	0.962	0.176863
A0A287B2U6	Synaptosomal-associated protein OS=Sus scrofa OX=9823 GN=SNAP23	SNAP23	23.258	57.3	10	24	9	0.981	1.002	1.01	1.029	0.938	0.976	1.035	1.049	1.017	0.983	0.56858	1.036	0.046996	1.054	0.134539
A0A287B2U9	UBX domain protein 7 OS=Sus scrofa OX=9823 GN=UBXN7	UBXN7	47.49	7.5	3	3	3	1.059	1.079	0.988	0.965	1.05	0.945	1.006	0.953	0.994	0.947	0.26026	0.945	0.146663	0.998	0.96702
A0A287B2Y5	Protein Njmu-R1 OS=Sus scrofa OX=9823 GN=C17orf75	C17orf75	44.545	4.3	2	4	2	0.902	1.12	1.03	1.053	1.075	0.924	1.089	0.807	0.992	1	0.9836	0.946	0.61614	0.946	0.57812
A0A287B2Z6	Ras association domain-containing protein 4 OS=Sus scrofa OX=9823 GN=RASSF4	RASSF4	26.002	11.1	2	5	2	1.24	1.106	1.138	0.919	1.018	0.981	0.815	0.974	0.834	0.838	0.0177751	0.753	0.0121359	0.899	0.161341
A0A287B311	AP-3 complex subunit beta OS=Sus scrofa OX=9823 GN=AP3B1	AP3B1	120.65	21.4	24	31	24	0.957	0.989	1.008	0.964	0.99	0.977	0.999	0.986	1.038	0.992	0.67618	1.023	0.34602	1.031	0.14906
A0A287B324	Uncharacterized protein OS=Sus scrofa OX=9823	---	365.92	0.5	2	2	2	0.986	1.106	0.906	1.022	1.046	1.048	0.98	0.933	0.984	1.039	0.54738	0.966	0.63198	0.93	0.0180632
A0A287B339	CCR4-NOT transcription complex subunit 2 OS=Sus scrofa OX=9823 GN=CNOT2	CNOT2	50.21	4.6	2	3	2	0.918	1.026	0.989	1.031	1.025	0.907	1.135	0.993	0.983	1.01	0.86634	1.061	0.36578	1.05	0.48214
A0A287B345	Calcium/calmodulin-dependent protein kinase type 1G OS=Sus scrofa OX=9823 GN=CAMK1G	CAMK1G	54.266	2.9	1	1	1	1.004	0.885	1.199	0.979	1.148	1.109	0.833	1.029	0.83	1.048	0.6301	0.872	0.30004	0.832	0.0953
A0A287B350	LIM domain containing preferred translocation partner in lipoma OS=Sus scrofa OX=9823 GN=LPP	LPP	61.632	50.2	20	76	20	1.075	1.069	1.055	0.965	1.024	1.052	0.908	0.925	0.887	0.951	0.120922	0.85	0.00026137	0.894	0.0170602
A0A287B356	Eukaryotic translation initiation factor 5A OS=Sus scrofa OX=9823 GN=EIF5A	EIF5A	16.832	40.3	8	21	8	1.075	0.994	1.038	1.076	0.974	1.044	0.907	0.917	0.918	0.996	0.90862	0.883	0.0056355	0.886	0.056324
A0A287B391	NEDD8-MDP1 readthrough OS=Sus scrofa OX=9823 GN=NEDD8-MDP1	NEDD8-MDP1	18.636	6.7	1	1	1
A0A287B3A6	GID complex subunit 4 homolog OS=Sus scrofa OX=9823 GN=GID4	GID4	24.803	6	1	1	1
A0A287B3A8	Pyrroline-5-carboxylate reductase OS=Sus scrofa OX=9823 GN=PYCR3	PYCR3	28.545	20.4	5	8	5	0.983	0.962	1.005	1.01	1.016	0.999	0.976	0.988	0.968	1.025	0.136103	0.994	0.68948	0.969	0.015579
A0A287B3E0	Uncharacterized protein OS=Sus scrofa OX=9823 GN=SRGAP2	SRGAP2	115.57	16.8	15	20	13	1.069	0.996	1.01	0.978	1.022	1.029	0.991	0.987	0.969	0.985	0.60972	0.958	0.137375	0.973	0.191758
A0A287B3E3	Single stranded DNA binding protein 2 OS=Sus scrofa OX=9823 GN=SSBP2	SSBP2	32.233	7.5	2	3	1
A0A287B3H4	DIS3 homolog, exosome endoribonuclease and 3'-5' exoribonuclease OS=Sus scrofa OX=9823 GN=DIS3	DIS3	109.2	10.4	8	11	8	1.098	1.031	1.02	0.908	0.939	1.051	0.98	0.978	1.041	0.92	0.165239	0.952	0.188825	1.035	0.50322
A0A287B3H6	Phosphate cytidylyltransferase 1, choline, alpha OS=Sus scrofa OX=9823 GN=PCYT1A	PCYT1A	36.44	14.4	5	7	5	1.093	1.065	0.987	0.937	1.021	1.018	0.947	0.975	0.931	0.946	0.25582	0.907	0.044519	0.959	0.25326
A0A287B3J0	Porphobilinogen deaminase OS=Sus scrofa OX=9823 GN=HMBS	HMBS	37.748	12.8	4	5	4	1.024	1.035	0.962	1.009	0.956	0.96	1.013	1.032	1.042	0.968	0.3255	1.022	0.41474	1.055	0.047904
A0A287B3M2	Uncharacterized protein OS=Sus scrofa OX=9823 GN=DNAJC7	DNAJC7	54.75	25.1	12	20	12	0.969	1.023	1.006	0.977	1.013	1.025	0.967	1.044	0.998	1.006	0.80454	1.004	0.90664	0.998	0.93558
A0A287B3P5	Negative regulator of ubiquitin like proteins 1 OS=Sus scrofa OX=9823 GN=NUB1	NUB1	59.943	30	13	18	13	1.068	1.025	1.007	0.987	0.995	1.042	0.982	0.949	0.997	0.975	0.36446	0.945	0.0662	0.968	0.22278
A0A287B3S9	Microtubule-associated protein OS=Sus scrofa OX=9823 GN=MAP2	MAP2	58.897	11.8	5	6	5	0.918	0.987	0.952	1.132	1.024	0.981	1.001	1.033	0.987	1.098	0.123302	1.057	0.087283	0.963	0.46342
A0A287B3U6	Uncharacterized protein OS=Sus scrofa OX=9823	---	20.983	64.9	10	37	9	1.006	0.997	1.012	1.021	1.055	1.021	0.97	0.971	0.972	1.027	0.085244	0.966	0.0158385	0.941	0.030541
A0A287B3W6	Uncharacterized protein OS=Sus scrofa OX=9823 GN=LOC100739735	LOC100739735	30.28	3.1	1	1	1
A0A287B3W9	FMR1 autosomal homolog 2 OS=Sus scrofa OX=9823 GN=FXR2	FXR2	63.596	11.9	6	6	5	1.082	0.911	0.999	1.017	1.018	0.96	0.909	0.935	1.188	1.001	0.95656	1.013	0.93644	1.012	0.95476
A0A287B3X9	SEC24 homolog B, COPII coat complex component OS=Sus scrofa OX=9823 GN=SEC24B	SEC24B	132.64	7	7	7	6	0.874	0.828	1.034	1.065	0.985	0.903	1.205	1.032	1.082	1.079	0.39276	1.213	0.073422	1.124	0.151637
A0A287B3Z2	Ras association domain family member 2 OS=Sus scrofa OX=9823 GN=RASSF2	RASSF2	37.862	21.2	6	8	6	0.948	1.019	0.955	1.043	0.99	0.941	1.019	1.006	1.045	1.018	0.66908	1.051	0.122696	1.032	0.36338
A0A287B401	RNA-binding protein 14 OS=Sus scrofa OX=9823 GN=RBM14	RBM14	69.561	26.3	15	21	15	1.043	1.051	1.017	0.998	0.969	1.008	0.997	0.99	0.95	0.956	0.044398	0.944	0.032996	0.987	0.53646
A0A287B403	Pumilio RNA binding family member 3 OS=Sus scrofa OX=9823 GN=PUM3	PUM3	62.64	4.5	3	3	3	0.899	0.881	0.919	1.011	1.053	1.057	1.082	0.994	1.115	1.156	0.00149842	1.182	0.010337	1.022	0.59932
A0A287B426	Phospholipase D family member 4 OS=Sus scrofa OX=9823 GN=PLD4	PLD4	49.93	9.2	4	5	4	0.987	0.983	1.03	1.028	1.007	0.944	0.963	0.957	1.044	0.993	0.8142	0.988	0.7109	0.995	0.89806
A0A287B438	Uncharacterized protein OS=Sus scrofa OX=9823	---	28.052	5.4	1	1	1
A0A287B457	SPARC related modular calcium binding 2 OS=Sus scrofa OX=9823 GN=SMOC2	SMOC2	50.687	1.8	1	1	1
A0A287B460	Single-pass membrane protein with coiled-coil domains 4 OS=Sus scrofa OX=9823 GN=SMCO4	SMCO4	6.724	13.6	2	4	2	1.068	1.075	1.167	0.97	1.039	0.968	0.902	0.948	0.986	0.899	0.045303	0.857	0.0159021	0.953	0.23372
A0A287B462	Mitochondrial amidoxime reducing component 2 OS=Sus scrofa OX=9823 GN=MARC2	MARC2	37.497	14	4	6	4	0.981	1.043	0.869	1.016	0.855	1.023	1.138	0.961	1.128	1	0.99828	1.115	0.22818	1.115	0.24544
A0A287B481	Aldehyde oxidase OS=Sus scrofa OX=9823 GN=AOX1	AOX1	143.33	2	2	2	2
A0A287B488	LIM domain kinase 1 OS=Sus scrofa OX=9823 GN=LIMK1	LIMK1	68.631	2.5	2	2	2
A0A287B499	Zinc finger protein 106 OS=Sus scrofa OX=9823 GN=ZNF106	ZNF106	117.45	1.9	2	2	2	0.999	0.998	0.788	1.131	1.203	1.001	0.819	1.066	1.02	1.197	0.127603	1.043	0.73142	0.871	0.22108
A0A287B4B9	Tripeptidyl peptidase 1 OS=Sus scrofa OX=9823 GN=TPP1	TPP1	50.556	8.8	3	4	3	0.962	1.029	1.021	0.961	0.973	0.961	1.062	0.999	1.008	0.961	0.144683	1.019	0.54568	1.06	0.040996
A0A287B4C5	Solute carrier family 41 member 3 OS=Sus scrofa OX=9823 GN=SLC41A3	SLC41A3	42.997	3.5	1	1	1
A0A287B4C9	Matrix remodeling associated 8 OS=Sus scrofa OX=9823 GN=MXRA8	MXRA8	43.427	7.8	3	3	3	0.61	0.659	0.671	1.624	1.763	1.759	0.69	0.602	0.617	2.653	1.8212e-05	0.984	0.75572	0.371	3.886e-05
A0A287B4D0	Supervillin OS=Sus scrofa OX=9823 GN=SVIL	SVIL	199.12	8	12	14	12	0.925	1.042	0.993	0.964	1.065	0.959	1.07	1.038	1.08	1.009	0.85554	1.077	0.108976	1.067	0.142776
A0A287B4D6	DDHD domain containing 1 OS=Sus scrofa OX=9823 GN=DDHD1	DDHD1	97.473	1.3	1	2	1
A0A287B4D9	HRas proto-oncogene, GTPase OS=Sus scrofa OX=9823 GN=HRAS	HRAS	21.223	30.2	5	7	1
A0A287B4E8	Fibulin 5 OS=Sus scrofa OX=9823 GN=FBLN5	FBLN5	50.145	23.7	10	31	10	1.068	1.01	1.025	0.96	0.981	0.989	1.001	0.987	0.996	0.944	0.039116	0.962	0.086943	1.018	0.134618
A0A287B4E9	Chloride channel CLIC like 1 OS=Sus scrofa OX=9823 GN=CLCC1	CLCC1	63.896	14.4	8	8	8	0.964	0.899	1.029	1.007	1.096	1.061	1.006	1.005	0.976	1.094	0.120478	1.033	0.44892	0.944	0.098461
A0A287B4G4	Ras-related C3 botulinum toxin substrate 1 OS=Sus scrofa OX=9823 GN=RAC1	RAC1	21.45	49.5	9	37	3	0.963	0.972	0.934	1.005	1.004	1.024	1	1.021	1.039	1.057	0.0150849	1.067	0.0169193	1.009	0.52988
A0A287B4G5	Centrosomal protein 131 OS=Sus scrofa OX=9823 GN=CEP131	CEP131	66.128	1.2	1	1	1
A0A287B4H3	Uncharacterized protein OS=Sus scrofa OX=9823	---	17.491	9.6	1	1	1	0.971	0.879	1.006	0.987	1.148	1.082	0.965	0.918	1.055	1.126	0.117642	1.029	0.64794	0.913	0.20548
A0A287B4H7	SURF1-like protein OS=Sus scrofa OX=9823 GN=SURF1	SURF1	33.25	14	3	4	3	1.142	0.98	0.912	1.126	0.788	0.816	1.107	1.187	0.98	0.9	0.43332	1.079	0.42252	1.199	0.20424
A0A287B4I0	ATP synthase subunit d, mitochondrial OS=Sus scrofa OX=9823 GN=ATP5PD	ATP5PD	18.515	38.5	8	17	8	0.982	1.01	1.028	1.029	1.008	0.978	1	1.018	1.061	0.998	0.9361	1.02	0.43224	1.021	0.41318
A0A287B4I2	Thymopoietin OS=Sus scrofa OX=9823 GN=TMPO	TMPO	41.161	45.4	14	51	2	0.869	1.03	0.945	1.035	1.09	1.092	0.97	0.865	0.985	1.131	0.073964	0.992	0.90966	0.877	0.040582
A0A287B4J0	Transmembrane protein 106B OS=Sus scrofa OX=9823 GN=TMEM106B	TMEM106B	31.33	9.1	2	2	2	0.901	0.942	1.02	1.003	1.127	1.011	1.031	1.005	0.966	1.097	0.15118	1.049	0.30274	0.956	0.35314
A0A287B4N2	Hematopoietic cell-specific Lyn substrate 1 OS=Sus scrofa OX=9823 GN=HCLS1	HCLS1	54.828	48.1	23	77	23	1.011	0.982	0.97	1.027	0.996	1.048	0.986	0.994	0.999	1.036	0.136565	1.005	0.68962	0.97	0.119138
A0A287B4N8	Uncharacterized protein OS=Sus scrofa OX=9823 GN=MARCKSL1	MARCKSL1	19.647	18.5	3	6	3	1.121	1.073	1.052	1.054	0.915	0.981	0.865	0.978	1.031	0.909	0.0972	0.885	0.088279	0.974	0.70282
A0A287B4P7	RAB31, member RAS oncogene family OS=Sus scrofa OX=9823 GN=RAB31	RAB31	21.619	25.6	4	9	2	1.157	1.045	0.967	1.085	0.967	1.001	1.017	0.991	0.996	0.963	0.59584	0.948	0.43542	0.984	0.6891
A0A287B4P8	Proteasome 26S subunit, ATPase 4 OS=Sus scrofa OX=9823 GN=PSMC4	PSMC4	47.366	22.7	13	19	13	1.004	1.028	1.024	0.973	0.995	0.992	0.988	0.974	0.991	0.969	0.034456	0.966	0.019344	0.998	0.80296
A0A287B4Q8	TBC1 domain family member 13 OS=Sus scrofa OX=9823 GN=TBC1D13	TBC1D13	42.892	19	6	6	6	1.019	1.012	1.015	1.002	0.952	0.97	1.039	1.007	1.114	0.96	0.112462	1.037	0.35346	1.081	0.082479
A0A287B4S0	Uncharacterized protein OS=Sus scrofa OX=9823 GN=HMGN1	HMGN1	10.76	24.8	3	5	3	1.162	1.358	1.358	0.987	0.956	0.952	0.773	0.734	0.734	0.747	0.0055162	0.578	0.00056386	0.774	0.000242
A0A287B4S7	Gamma-tubulin complex component OS=Sus scrofa OX=9823 GN=TUBGCP2	TUBGCP2	92.383	4.4	4	5	4	1.113	1.039	1.021	0.972	1.007	1.019	0.925	0.99	0.935	0.945	0.133277	0.898	0.033679	0.951	0.115777
A0A287B4V0	N-glycanase 1 OS=Sus scrofa OX=9823 GN=NGLY1	NGLY1	65.653	13.8	8	10	8	1.043	1.033	1.045	0.979	0.949	0.966	1.007	1.036	1.032	0.927	0.00146066	0.985	0.194536	1.063	0.0086993
A0A287B4V4	ArfGAP with SH3 domain, ankyrin repeat and PH domain 2 OS=Sus scrofa OX=9823 GN=ASAP2	ASAP2	111.48	4	4	4	3
A0A287B4X2	N(alpha)-acetyltransferase 15, NatA auxiliary subunit OS=Sus scrofa OX=9823 GN=NAA15	NAA15	101.2	18.2	17	20	1
A0A287B4X4	Integrin alpha-IIb precursor OS=Sus scrofa OX=9823 GN=GPATCH8	GPATCH8	156.1	3.9	5	5	4
A0A287B4X7	Uncharacterized protein OS=Sus scrofa OX=9823 GN=RAB4B	RAB4B	21.155	25.9	4	6	2	1.029	1.1	1.041	0.984	0.931	0.957	0.954	0.96	1.057	0.906	0.0194026	0.937	0.168642	1.034	0.42046
A0A287B4X9	Guanylate cyclase OS=Sus scrofa OX=9823 GN=NPR2	NPR2	114.4	1.7	2	2	2	1.061	0.919	1.116	0.954	1.019	0.924	1.024	1.056	0.945	0.936	0.38046	0.977	0.7699	1.044	0.38284
A0A287B4Y0	BLOC-1-related complex subunit 7 OS=Sus scrofa OX=9823 GN=BORCS7	BORCS7	11.562	9.5	1	1	1
A0A287B4Y9	Mitogen-activated protein kinase kinase 4 OS=Sus scrofa OX=9823 GN=MAP2K4	MAP2K4	41.504	16	5	5	5	1.065	1.07	0.986	0.858	1.319	0.928	0.944	1.04	0.804	0.995	0.87552	0.893	0.2133	0.898	0.56522
A0A287B4Z7	Proliferating cell nuclear antigen OS=Sus scrofa OX=9823	---	27.696	19.4	4	12	1
A0A287B501	Ring-box 1 OS=Sus scrofa OX=9823 GN=RBX1	RBX1	12.274	13	2	2	2	1.013	1.008	0.98	1.01	0.973	1.009	1.054	0.991	0.978	0.997	0.85852	1.007	0.799	1.01	0.72342
A0A287B502	Polysaccharide biosynthesis domain containing 1 OS=Sus scrofa OX=9823 GN=PBDC1	PBDC1	19.21	25.6	4	6	4	0.911	0.88	0.93	1.086	1.017	0.919	1.178	1.007	1.083	1.111	0.114855	1.201	0.0195833	1.081	0.3025
A0A287B509	Proline rich coiled-coil 2B OS=Sus scrofa OX=9823 GN=PRRC2B	PRRC2B	240.16	2	4	4	4
A0A287B553	VPS53, GARP complex subunit OS=Sus scrofa OX=9823 GN=VPS53	VPS53	91.131	4.1	3	4	3	0.954	1.055	1.176	1.049	0.921	0.85	0.826	1.273	0.918	0.885	0.22974	0.947	0.6605	1.07	0.7271
A0A287B556	SMG1, nonsense mediated mRNA decay associated PI3K related kinase OS=Sus scrofa OX=9823 GN=SMG1	SMG1	409	1.2	5	5	5	0.897	1.011	1.174	1.144	0.859	0.993	1.015	1.08	0.838	0.972	0.81078	0.952	0.67534	0.979	0.86672
A0A287B568	Myc box-dependent-interacting protein 1 OS=Sus scrofa OX=9823 GN=BIN1	BIN1	53.703	28.8	12	20	10	1.123	1.089	1.066	1.004	1.024	1.002	0.943	0.924	0.915	0.924	0.0091781	0.849	0.00072442	0.918	0.0016204
A0A287B574	Succinate--CoA ligase [ADP/GDP-forming] subunit alpha, mitochondrial OS=Sus scrofa OX=9823 GN=SUCLG1	SUCLG1	35.534	24.8	6	9	6	1.117	1.04	1.059	0.963	0.921	0.952	0.995	0.986	0.979	0.882	0.0076769	0.92	0.0197794	1.044	0.038717
A0A287B5A2	Sodium/potassium-transporting ATPase subunit beta OS=Sus scrofa OX=9823 GN=ATP1B3	ATP1B3	31.751	26.2	7	16	7	0.998	0.995	0.973	1.004	1.017	0.974	1.043	0.993	0.988	1.01	0.55832	1.02	0.3719	1.01	0.68154
A0A287B5G0	Uncharacterized protein OS=Sus scrofa OX=9823	---	16.329	22.9	3	8	0
A0A287B5G2	Neurobeachin like 2 OS=Sus scrofa OX=9823 GN=NBEAL2	NBEAL2	299.96	7	16	19	16	1.046	0.966	0.998	1.008	1.016	0.983	0.974	1.028	0.997	0.999	0.98326	0.996	0.9096	0.997	0.8868
A0A287B5G9	AP complex subunit beta OS=Sus scrofa OX=9823 GN=AP1B1	AP1B1	103.74	21.2	21	52	7	0.957	0.96	1.051	0.953	1.02	0.99	1.016	0.987	1.015	0.998	0.977	1.017	0.61386	1.019	0.44026
A0A287B5H5	Tubulin alpha chain OS=Sus scrofa OX=9823 GN=TUBA8	TUBA8	49.324	23	11	66	1	0.976	1.05	0.999	0.974	0.965	1.032	1.022	1.022	0.974	0.982	0.58216	0.998	0.94128	1.016	0.58014
A0A287B5J4	G protein-coupled receptor kinase OS=Sus scrofa OX=9823 GN=GRK3	GRK3	79.823	8.4	6	7	3	0.827	0.909	0.849	1.073	1.048	1.105	1.009	1.102	1.093	1.248	0.0022815	1.239	0.0057194	0.993	0.82878
A0A287B5K8	Mothers against decapentaplegic homolog OS=Sus scrofa OX=9823 GN=SMAD4	SMAD4	52.684	3.3	2	2	2
A0A287B5N7	Tropomyosin alpha-1 chain OS=Sus scrofa OX=9823 GN=TPM1	TPM1	44.172	48.1	26	56	1	0.824	0.82	0.923	0.944	0.964	0.991	1.172	1.141	1.235	1.129	0.040397	1.382	0.00197788	1.224	0.00175955
A0A287B5Q7	Proteasome 26S subunit, non-ATPase 8 OS=Sus scrofa OX=9823 GN=PSMD8	PSMD8	39.732	16	7	7	7	0.979	0.98	1.044	1	0.978	1.002	0.971	1.007	1.052	0.992	0.76342	1.009	0.79186	1.017	0.5444
A0A287B5T2	Cyclin dependent kinase 12 OS=Sus scrofa OX=9823 GN=CDK12	CDK12	143.5	1.5	2	2	1
A0A287B5U7	GRIP and coiled-coil domain containing 2 OS=Sus scrofa OX=9823 GN=GCC2	GCC2	184.84	7	10	13	10	1.004	0.905	1.074	1.004	0.901	0.97	1.051	1.088	1.132	0.964	0.5815	1.097	0.157418	1.138	0.02806
A0A287B5V1	60S ribosomal protein L3 OS=Sus scrofa OX=9823 GN=RPL3	RPL3	46.122	39.2	17	54	14	1.02	1.03	1.04	1.004	0.983	0.981	0.974	0.995	1	0.961	0.0122639	0.961	0.0152629	1	0.97764
A0A287B5V4	Protein kinase C OS=Sus scrofa OX=9823 GN=PRKCI	PRKCI	63.03	4.2	2	2	2	0.961	0.881	0.894	0.98	1.03	1.015	1.091	1.119	1.051	1.106	0.030155	1.192	0.0056169	1.078	0.032902
A0A287B5X3	NOP58 ribonucleoprotein OS=Sus scrofa OX=9823 GN=NOP58	NOP58	60.46	26.4	12	22	12	0.997	0.989	1.012	1.011	1.024	1.006	0.975	0.951	1.03	1.014	0.17108	0.986	0.583	0.972	0.2979
A0A287B5Y2	Phosphate cytidylyltransferase 2, ethanolamine OS=Sus scrofa OX=9823 GN=PCYT2	PCYT2	43.935	9.3	4	5	4	0.998	1.001	1.013	1.057	1.077	1.056	0.936	0.983	0.929	1.059	0.00187751	0.946	0.037041	0.893	0.0038016
A0A287B5Z2	Poly(A) RNA polymerase D5, non-canonical OS=Sus scrofa OX=9823 GN=PAPD5	PAPD5	68.42	2.4	1	1	1
A0A287B5Z8	NOP10 ribonucleoprotein OS=Sus scrofa OX=9823 GN=NOP10	NOP10	7.6418	12.5	1	1	1
A0A287B600	Synemin OS=Sus scrofa OX=9823 GN=SYNM	SYNM	162.86	23.7	33	46	32	1.058	1.055	0.993	0.972	0.952	0.967	0.998	0.993	1.007	0.931	0.029857	0.965	0.172342	1.037	0.0082402
A0A287B636	Alpha-galactosidase OS=Sus scrofa OX=9823 GN=GLA	GLA	48.998	29.3	11	14	11	0.978	0.939	1.004	1.051	0.999	0.997	1	1.017	1.053	1.043	0.179242	1.051	0.113522	1.008	0.75804
A0A287B657	Apoptosis inducing factor, mitochondria associated 2 OS=Sus scrofa OX=9823 GN=AIFM2	AIFM2	40.344	4.6	1	1	1	0.977	1.117	0.862	1.054	1.027	0.815	0.975	1.069	1.12	0.98	0.85626	1.07	0.4459	1.093	0.36446
A0A287B663	Suppressor of SWI4 1 homolog OS=Sus scrofa OX=9823 GN=PPAN	PPAN	46.275	6.8	2	3	2	0.822	1.038	1.099	0.867	1	0.946	1.071	1.019	1.135	0.951	0.67258	1.09	0.38008	1.146	0.057165
A0A287B692	RNA binding motif protein 12B OS=Sus scrofa OX=9823 GN=RBM12B	RBM12B	101.82	7.1	4	4	4
A0A287B6E0	Importin 11 OS=Sus scrofa OX=9823 GN=IPO11	IPO11	101.33	1.9	2	2	2
A0A287B6H1	Interleukin 1 receptor accessory protein OS=Sus scrofa OX=9823 GN=IL1RAP	IL1RAP	38.883	3	1	1	1	0.952	0.871	0.896	0.885	1.032	0.901	1.137	1.216	1.134	1.036	0.5702	1.282	0.0020185	1.237	0.0160365
A0A287B6I2	Splicing factor 1 OS=Sus scrofa OX=9823 GN=SF1	SF1	59.697	14.2	8	17	8	0.95	0.989	1.041	1.008	1.014	1.002	1.007	0.96	1.029	1.015	0.62338	1.005	0.87446	0.991	0.66482
A0A287B6J2	Tumor protein p53 binding protein 1 OS=Sus scrofa OX=9823 GN=TP53BP1	TP53BP1	205.87	6.3	9	9	9	1.029	0.938	0.97	1.012	0.99	0.985	1.017	0.872	0.998	1.017	0.56892	0.983	0.75248	0.967	0.5012
A0A287B6J6	Heat shock protein family A (Hsp70) member 4 OS=Sus scrofa OX=9823 GN=HSPA4	HSPA4	95.423	49.6	39	90	2	1.113	1.088	1.028	0.917	1.021	0.982	0.98	1.041	0.851	0.904	0.061937	0.889	0.134722	0.984	0.79102
A0A287B6K6	RNA binding protein fox-1 homolog OS=Sus scrofa OX=9823 GN=RBFOX2	RBFOX2	33.93	5.4	2	2	2	0.874	0.94	0.973	1.089	0.847	1.004	1.069	1.149	1.073	1.055	0.57536	1.181	0.0133413	1.119	0.20448
A0A287B6K7	Uncharacterized protein OS=Sus scrofa OX=9823 GN=ACAD10	ACAD10	97.584	6.1	5	5	5	1.04	0.988	1.038	1.037	0.938	0.903	1.098	0.926	1.043	0.939	0.22	1	0.97306	1.066	0.38986
A0A287B6M9	Phosphatidylinositol-3,4,5-trisphosphate dependent Rac exchange factor 1 OS=Sus scrofa OX=9823 GN=PREX1	PREX1	183.22	9.3	14	17	14	1.036	1.048	0.995	0.987	1.045	1.041	0.949	0.997	0.981	0.998	0.9369	0.951	0.077436	0.952	0.107323
A0A287B6S3	Programmed cell death 4 OS=Sus scrofa OX=9823 GN=PDCD4	PDCD4	44.985	21.5	8	16	8	1.098	1.119	1.074	1.03	0.958	1.003	0.876	0.902	0.919	0.909	0.0167838	0.82	0.00040284	0.902	0.0151984
A0A287B6S9	ADP ribosylation factor like GTPase 5A OS=Sus scrofa OX=9823 GN=ARL5A	ARL5A	16.385	14.8	2	3	2	1.216	0.937	1.105	0.953	0.983	1.012	0.734	0.976	1.115	0.905	0.29244	0.867	0.35436	0.958	0.69154
A0A287B6T0	Striatin OS=Sus scrofa OX=9823 GN=STRN	STRN	86.233	14.7	9	10	9	0.975	0.995	1.023	1.046	0.965	1.004	0.99	1.065	1.011	1.007	0.80968	1.024	0.408	1.017	0.62462
A0A287B6U8	Tetraspanin-31 OS=Sus scrofa OX=9823 GN=TSPAN31	TSPAN31	30.425	6.1	2	2	2
A0A287B6U9	YTH N6-methyladenosine RNA binding protein 3 OS=Sus scrofa OX=9823 GN=YTHDF3	YTHDF3	58.281	12.9	6	10	4
A0A287B6V8	Mitogen-activated protein kinase kinase kinase 20 OS=Sus scrofa OX=9823 GN=MAP3K20	MAP3K20	52.105	8.1	3	4	3	1.067	1.096	0.993	0.981	0.984	0.907	1.018	0.968	1.015	0.91	0.076905	0.951	0.2136	1.045	0.22878
A0A287B6W1	Transforming growth factor beta 1 induced transcript 1 OS=Sus scrofa OX=9823 GN=TGFB1I1	TGFB1I1	47.431	24.4	11	14	11	1.065	0.987	0.969	0.97	0.931	0.939	1.007	1.077	1.039	0.94	0.124423	1.034	0.38838	1.1	0.0148012
A0A287B6W4	Nucleus accumbens associated 1 OS=Sus scrofa OX=9823 GN=NACC1	NACC1	53.845	5.8	2	2	2	0.947	1.148	0.982	0.984	1.1	0.862	0.921	1.091	0.976	0.957	0.6508	0.971	0.73246	1.014	0.85666
A0A287B6Z4	Zinc finger protein 710 OS=Sus scrofa OX=9823 GN=ZNF710	ZNF710	74.559	1.4	1	1	1
A0A287B703	U3 small nucleolar ribonucleoprotein protein MPP10 OS=Sus scrofa OX=9823 GN=MPHOSPH10	MPHOSPH10	74.645	4.5	2	2	2	0.912	0.957	1.009	0.93	1.042	0.978	1.053	0.928	1.193	1.025	0.6075	1.103	0.2977	1.076	0.43496
A0A287B707	DExH-box helicase 30 OS=Sus scrofa OX=9823 GN=DHX30	DHX30	112.23	2	2	4	2	1.035	0.881	0.997	0.999	0.989	0.846	1.11	0.931	1.225	0.973	0.71924	1.121	0.3049	1.152	0.22544
A0A287B719	Uncharacterized protein OS=Sus scrofa OX=9823 GN=MRPS36	MRPS36	11.463	24.5	3	4	3	1.029	1.018	1.006	1.027	1.027	1.004	0.921	1.015	0.97	1.002	0.87878	0.952	0.157239	0.95	0.149899
A0A287B722	Myotubularin related protein 14 OS=Sus scrofa OX=9823 GN=MTMR14	MTMR14	60.538	6.3	3	3	3
A0A287B742	TROVE domain family member 2 OS=Sus scrofa OX=9823 GN=TROVE2	TROVE2	60.451	17.3	10	13	10	1	1.086	1.026	0.966	0.984	1.007	0.971	0.977	1.003	0.95	0.13592	0.948	0.116256	0.998	0.90488
A0A287B749	Tubulin beta chain OS=Sus scrofa OX=9823 GN=TUBB6	TUBB6	45.361	37.7	13	83	6	1.152	1.079	1.023	1.001	0.978	0.93	0.909	0.989	0.943	0.894	0.05186	0.873	0.032679	0.977	0.50704
A0A287B759	N-acetylglucosamine kinase OS=Sus scrofa OX=9823 GN=NAGK	NAGK	31.965	32.1	8	14	8	1.055	0.983	0.934	0.974	0.975	1.026	0.99	1.003	0.954	1.001	0.96252	0.992	0.85608	0.991	0.70174
A0A287B763	Asparaginyl-tRNA synthetase 2, mitochondrial OS=Sus scrofa OX=9823 GN=NARS2	NARS2	45.478	3	1	1	1	0.919	0.899	0.968	0.928	0.968	0.953	1.249	1.017	1.105	1.023	0.41786	1.21	0.042016	1.183	0.053843
A0A287B770	Serine/arginine-rich splicing factor 10 isoform 1 OS=Sus scrofa OX=9823 GN=SRSF10	SRSF10	31.3	15.3	4	6	4	1.041	1.039	1.012	0.989	0.993	0.974	0.952	0.968	1.046	0.956	0.0143569	0.959	0.23596	1.003	0.93516
A0A287B771	40S ribosomal protein S4 OS=Sus scrofa OX=9823 GN=RPS4X	RPS4X	27.504	44.1	11	31	11	0.984	1.025	0.999	1.035	0.993	1.034	0.964	0.989	0.967	1.018	0.38274	0.971	0.108678	0.954	0.040444
A0A287B773	Methylcrotonoyl-CoA carboxylase 2 OS=Sus scrofa OX=9823 GN=MCCC2	MCCC2	61.346	14.4	6	8	6	1.086	1.15	0.959	0.97	1.008	1.02	0.982	0.984	0.979	0.938	0.33488	0.922	0.28022	0.982	0.36736
A0A287B778	Ubiquitin conjugating enzyme E2 O OS=Sus scrofa OX=9823 GN=UBE2O	UBE2O	140.96	13.3	16	17	16	1.052	1.027	1.025	0.975	0.997	0.967	0.948	0.937	0.964	0.947	0.0115613	0.918	0.00187591	0.969	0.064824
A0A287B781	Uncharacterized protein OS=Sus scrofa OX=9823 GN=LOC110258364	LOC110258364	8.5328	31.2	3	5	3	1.126	1.054	1.056	0.994	0.937	1.019	0.95	0.939	0.958	0.912	0.048504	0.88	0.0047449	0.965	0.24306
A0A287B787	Ankyrin repeat domain 44 OS=Sus scrofa OX=9823 GN=ANKRD44	ANKRD44	114.28	9.8	8	12	8	1.014	0.997	1.044	1.017	0.974	1.036	0.965	0.955	0.963	0.991	0.70126	0.944	0.0139235	0.952	0.059484
A0A287B791	Folylpolyglutamate synthase OS=Sus scrofa OX=9823 GN=FPGS	FPGS	62.942	1.9	1	2	1	0.949	1.032	1.019	0.989	1.033	0.911	1.014	1.01	1.052	0.978	0.6336	1.025	0.43052	1.049	0.27982
A0A287B792	UDP-N-acetylglucosamine pyrophosphorylase 1 OS=Sus scrofa OX=9823 GN=UAP1	UAP1	53.17	11.9	4	7	4	0.814	0.878	0.915	0.943	1.047	0.989	1.152	1.178	1.094	1.143	0.043024	1.313	0.0025552	1.149	0.020121
A0A287B7A2	RWD domain containing 4 OS=Sus scrofa OX=9823 GN=RWDD4	RWDD4	25.122	8.7	2	2	2	0.925	1.073	0.97	1.048	1.008	1.123	1.008	0.924	0.929	1.071	0.26668	0.964	0.53158	0.9	0.067762
A0A287B7A4	Ubiquitin-like protein OS=Sus scrofa OX=9823 GN=UBL3	UBL3	13.157	10.3	1	2	1
A0A287B7C9	Protein arginine methyltransferase 1 OS=Sus scrofa OX=9823 GN=PRMT1	PRMT1	37.681	35.4	12	23	12	1.016	1.051	1.027	1.007	0.95	1.021	1.008	0.973	0.988	0.963	0.186555	0.96	0.044825	0.997	0.91864
A0A287B7E0	Mitogen-activated protein kinase OS=Sus scrofa OX=9823 GN=MAPK11	MAPK11	38.077	4.8	1	1	1	0.978	0.907	1.085	0.911	1.001	0.933	1.094	1.017	1.084	0.958	0.52542	1.076	0.25598	1.123	0.033104
A0A287B7F5	Cordon-bleu WH2 repeat protein like 1 OS=Sus scrofa OX=9823 GN=COBLL1	COBLL1	123.03	4.7	4	5	4
A0A287B7H2	Discs large MAGUK scaffold protein 1 OS=Sus scrofa OX=9823 GN=DLG1	DLG1	97.212	16.1	12	16	11	1.051	1.051	1.142	1.007	0.975	0.975	0.972	0.955	0.965	0.912	0.036335	0.891	0.0154237	0.978	0.136875
A0A287B7J9	40S ribosomal protein S24 OS=Sus scrofa OX=9823 GN=RPS24	RPS24	13.704	27.7	3	10	3	0.978	1.05	1.07	1.025	0.993	1.039	0.923	0.97	0.952	0.987	0.69704	0.918	0.052224	0.931	0.021922
A0A287B7K1	Prolyl 3-hydroxylase 2 OS=Sus scrofa OX=9823 GN=P3H2	P3H2	75.705	10.3	6	7	6	0.92	0.894	0.929	0.941	0.93	0.904	1.226	1.071	1.198	1.012	0.52284	1.274	0.0051243	1.259	0.0061787
A0A287B7K5	Uncharacterized protein OS=Sus scrofa OX=9823 GN=LOC100621521	LOC100621521	37.85	33.3	10	16	10	1.026	1.017	0.97	0.999	0.981	1.044	0.95	0.977	0.954	1.004	0.89404	0.956	0.084137	0.953	0.077865
A0A287B7N2	SAFB like transcription modulator OS=Sus scrofa OX=9823 GN=SLTM	SLTM	111.66	4	4	4	4	1.14	1.015	1.032	0.943	1.034	0.95	0.9	1.023	0.987	0.918	0.144615	0.913	0.158779	0.994	0.90112
A0A287B7R7	Protein transport protein sec16 OS=Sus scrofa OX=9823 GN=SEC16A	SEC16A	241.78	10.1	16	20	16	1.023	1.031	1.043	1.018	0.992	1.03	1.022	0.965	0.99	0.982	0.20808	0.961	0.085855	0.979	0.35044
A0A287B7S7	Acyl-CoA synthetase family member 2 OS=Sus scrofa OX=9823 GN=ACSF2	ACSF2	68.112	25.7	13	28	13	1.01	1.047	1.048	0.984	0.999	0.979	0.986	0.981	0.983	0.954	0.025777	0.95	0.052976	0.996	0.55466
A0A287B7T3	Phospholipase B-like OS=Sus scrofa OX=9823 GN=PLBD1	PLBD1	60.139	13.2	8	13	8	1.002	1	0.976	1.084	1.085	1.073	0.923	0.918	0.945	1.089	0.00075686	0.936	0.0055759	0.859	9.66e-05
A0A287B7U9	N-acetylgalactosamine-6-sulfatase OS=Sus scrofa OX=9823 GN=GALNS	GALNS	53.754	5.2	2	3	2	1.092	0.926	0.958	0.983	1.028	0.938	1.259	1.048	0.788	0.991	0.90456	1.04	0.87898	1.05	0.8352
A0A287B7V0	Phosphoinositide kinase, FYVE-type zinc finger containing OS=Sus scrofa OX=9823 GN=PIKFYVE	PIKFYVE	231.06	1.5	3	3	3	0.957	1.197	0.07		1.345	1.31	0.923	1.253	0.979	1.791	0.34266	1.419	0.43704	0.792	0.140142
A0A287B803	Serine/threonine kinase 11 OS=Sus scrofa OX=9823 GN=STK11	STK11	48.538	9.3	3	3	3	1.13	1.087	0.926	1.08	1.036	0.978	0.993	0.879	0.908	0.984	0.8576	0.885	0.165179	0.899	0.081556
A0A287B820	Quinone oxidoreductase OS=Sus scrofa OX=9823 GN=CRYZ	CRYZ	31.62	24.3	6	8	6	1.016	1.032	1.089	1.045	0.953	0.973	1.004	1.025	0.88	0.947	0.192417	0.927	0.21284	0.979	0.70442
A0A287B836	Lysosome-associated membrane glycoprotein 2 isoform 1 precursor OS=Sus scrofa OX=9823 GN=LAMP2	LAMP2	44.952	7.8	4	5	1
A0A287B838	Uncharacterized protein OS=Sus scrofa OX=9823 GN=LOC100624559	LOC100624559	265.18	1	3	4	3	0.976	0.967	0.947	1.039	1.082	0.965	1.038	0.958	1.04	1.068	0.135937	1.051	0.163016	0.984	0.72996
A0A287B842	Euchromatic histone lysine methyltransferase 1 OS=Sus scrofa OX=9823 GN=EHMT1	EHMT1	131.77	1	1	1	1	0.906	1.117	1.054	0.759	0.868	0.789	1.006	1.391	1.13	0.785	0.031803	1.146	0.31186	1.46	0.022623
A0A287B880	NPL4 homolog, ubiquitin recognition factor OS=Sus scrofa OX=9823 GN=NPLOC4	NPLOC4	69.192	21.4	13	16	13	1.038	0.994	1.054	0.977	1.024	1	0.967	1.041	0.959	0.972	0.27826	0.961	0.27514	0.989	0.70638
A0A287B886	TBC1 domain family member 1 OS=Sus scrofa OX=9823 GN=TBC1D1	TBC1D1	131.63	10.3	11	17	10	0.998	1.019	0.939	1.061	0.886	0.988	1.048	0.929	1.057	0.993	0.88062	1.026	0.63336	1.034	0.63652
A0A287B893	TSR1, ribosome maturation factor OS=Sus scrofa OX=9823 GN=TSR1	TSR1	92.026	7.2	5	9	5	0.997	0.933	1.034	0.987	1.015	0.955	0.988	0.981	1.055	0.998	0.96186	1.02	0.61946	1.023	0.48828
A0A287B897	Tripartite motif containing 3 OS=Sus scrofa OX=9823 GN=TRIM3	TRIM3	67.318	1.8	1	1	1
A0A287B8B1	Uncharacterized protein OS=Sus scrofa OX=9823 GN=ST13	ST13	40.733	24.7	8	29	8	1.029	1.018	0.999	0.994	0.946	1.014	1.016	1.008	0.959	0.97	0.23792	0.979	0.35068	1.01	0.73722
A0A287B8D6	Nucleoporin 58 OS=Sus scrofa OX=9823 GN=NUP58	NUP58	56.837	6.9	3	3	3	1.323	1.112	0.934	1.035	1.061	0.921	0.897	0.723	1.017	0.896	0.40394	0.783	0.158921	0.874	0.26032
A0A287B8F2	Regulation of nuclear pre-mRNA domain containing 1B OS=Sus scrofa OX=9823 GN=RPRD1B	RPRD1B	33.528	36.7	9	13	9	1.045	1.061	0.982	1.005	0.986	1.027	1.005	0.984	0.941	0.977	0.4424	0.949	0.162378	0.971	0.25892
A0A287B8I3	Uncharacterized protein OS=Sus scrofa OX=9823 GN=FAM107B	FAM107B	15.529	35.9	5	8	5	0.998	1.035	0.937	0.999	1.015	0.93	1.042	1.092	1.049	0.991	0.8374	1.072	0.098197	1.081	0.062282
A0A287B8J0	LAS1 like, ribosome biogenesis factor OS=Sus scrofa OX=9823 GN=LAS1L	LAS1L	78.752	5.4	3	3	3
A0A287B8K2	Nudix hydrolase 19 OS=Sus scrofa OX=9823 GN=NUDT19	NUDT19	35.88	5	1	1	1
A0A287B8L8	Myotubularin-related protein 5 OS=Sus scrofa OX=9823 GN=SBF1	SBF1	202.88	7.6	12	13	11	0.983	0.954	0.92	1.136	0.953	0.991	1.07	1.029	1.065	1.078	0.26848	1.107	0.0108844	1.027	0.6165
A0A287B8M2	Abelson helper integration site 1 OS=Sus scrofa OX=9823 GN=AHI1	AHI1	115.69	1.4	1	1	1
A0A287B8P2	Uncharacterized protein OS=Sus scrofa OX=9823 GN=BPTF	BPTF	268.95	1.4	3	4	3	1.211	1.097	0.898	0.944	0.781	1.126	1.063	0.978	0.933	0.889	0.42892	0.928	0.51162	1.043	0.66814
A0A287B8Q9	Very low-density lipoprotein receptor precursor OS=Sus scrofa OX=9823 GN=VLDLR	VLDLR	88.796	4.4	3	3	3
A0A287B8R2	Nuclear migration protein nudC OS=Sus scrofa OX=9823 GN=NUDC	NUDC	46.705	35.2	15	32	15	0.938	1.014	0.994	0.974	0.986	1.034	1.005	0.966	1.011	1.016	0.61012	1.012	0.67216	0.996	0.87494
A0A287B8R9	Zinc finger CCCH-type containing 14 OS=Sus scrofa OX=9823 GN=ZC3H14	ZC3H14	65.311	9.8	5	6	5	1.083	1.143	1.059	0.955	1.016	0.955	0.92	1.032	0.964	0.891	0.0195409	0.888	0.04114	0.997	0.92158
A0A287B8S1	Histone-lysine N-methyltransferase OS=Sus scrofa OX=9823 GN=SETD3	SETD3	60.244	12.3	5	7	5	0.899	0.944	1.125	1.024	0.986	1.055	0.831	1.081	1.035	1.033	0.63364	0.993	0.93762	0.962	0.61692
A0A287B8U9	Protein phosphatase 1 regulatory subunit 12B OS=Sus scrofa OX=9823 GN=PPP1R12B	PPP1R12B	20.219	37.1	7	14	7	1.037	1.055	1.024	0.99	0.952	1.001	1.015	0.983	0.99	0.944	0.030745	0.959	0.032057	1.015	0.44432
A0A287B8V1	Uncharacterized protein OS=Sus scrofa OX=9823 GN=RAPGEF6	RAPGEF6	162.76	0.8	1	1	1	0.875	1.073	1.032	1.042	1.071	0.945	0.971	0.988	1.005	1.026	0.71908	0.995	0.98162	0.969	0.48882
A0A287B8W8	Nuclear receptor binding protein 2 OS=Sus scrofa OX=9823 GN=NRBP2	NRBP2	53.817	2.5	1	1	1
A0A287B8W9	Protein kinase C delta type OS=Sus scrofa OX=9823 GN=PRKCD	PRKCD	77.272	34.2	23	43	1
A0A287B8X4	Uncharacterized protein OS=Sus scrofa OX=9823 GN=SRSF7	SRSF7	15.763	47.4	7	18	6	0.969	0.988	1.022	0.989	1.006	1.053	0.984	1.036	0.966	1.023	0.40216	1.002	0.93828	0.98	0.50312
A0A287B8Y7	Eukaryotic translation initiation factor 4 gamma 3 OS=Sus scrofa OX=9823 GN=EIF4G3	EIF4G3	176.13	13.3	20	22	17	1.011	0.974	0.979	1.025	0.96	0.991	1.019	1.017	0.987	1.004	0.8719	1.02	0.2739	1.016	0.50102
A0A287B8Y9	Epsin 2 OS=Sus scrofa OX=9823 GN=EPN2	EPN2	61.124	16.3	7	10	5	0.949	0.956	1.01	1.002	0.981	1.013	1.038	1.058	1.009	1.028	0.27256	1.065	0.057639	1.036	0.099638
A0A287B8Z8	Uncharacterized protein OS=Sus scrofa OX=9823 GN=LLPH	LLPH	14.961	12.6	1	1	1
A0A287B900	VPS26, retromer complex component A OS=Sus scrofa OX=9823 GN=VPS26A	VPS26A	35.428	31.1	12	21	11	1.055	1.028	0.982	0.986	1.042	0.991	0.979	0.975	1.016	0.985	0.61316	0.969	0.2752	0.984	0.50116
A0A287B906	Uncharacterized protein OS=Sus scrofa OX=9823 GN=NEXN	NEXN	68.051	8.5	5	5	5	0.826	0.975	1.004	0.964	0.96	0.95	1.099	1.108	1.12	1.025	0.69186	1.186	0.10382	1.158	3.5455e-05
A0A287B929	60S ribosomal protein L13a OS=Sus scrofa OX=9823 GN=RPL13A	RPL13A	23.709	28.4	7	23	7	1.002	0.935	1.01	1.011	1.012	1.009	1.003	0.963	1.012	1.029	0.35806	1.011	0.7267	0.982	0.35622
A0A287B944	Family with sequence similarity 114 member A1 OS=Sus scrofa OX=9823 GN=FAM114A1	FAM114A1	43.333	9.6	3	4	3	0.989	0.959	1.058	0.948	0.998	0.919	0.947	1.001	1.108	0.953	0.2736	1.017	0.79344	1.067	0.29148
A0A287B945	LPS responsive beige-like anchor protein OS=Sus scrofa OX=9823 GN=LRBA	LRBA	314.2	6.6	16	19	15	0.984	1.028	1.007	1.007	0.999	0.928	0.978	1.044	1.006	0.972	0.37158	1.003	0.90866	1.032	0.378
A0A287B954	GATA zinc finger domain containing 2B OS=Sus scrofa OX=9823 GN=GATAD2B	GATAD2B	65.26	21.9	10	13	9	0.963	0.992	0.996	1.054	1.015	0.925	1.009	1.002	1.017	1.015	0.7612	1.026	0.087055	1.011	0.77468
A0A287B966	Megakaryoblastic leukemia (translocation) 1 OS=Sus scrofa OX=9823 GN=MKL1	MKL1	112.11	1.4	1	1	1
A0A287B9F1	Phosphatase and actin regulator OS=Sus scrofa OX=9823 GN=PHACTR2	PHACTR2	68.152	5.9	3	3	3	0.952	1.085	1.022	1.023	1.047	1.126	0.918	0.837	0.993	1.045	0.40358	0.898	0.156819	0.86	0.055979
A0A287B9L0	Nucleoporin 214 OS=Sus scrofa OX=9823 GN=NUP214	NUP214	194.8	6.1	11	11	11	0.966	0.991	1.047	1.035	0.99	1.028	1.057	1.005	0.995	1.016	0.57942	1.018	0.58964	1.001	0.96302
A0A287B9L4	Fibronectin type III domain containing 3A OS=Sus scrofa OX=9823 GN=FNDC3A	FNDC3A	124.77	2.8	3	3	3	1.138	1.073	1.083	1.001	0.843	0.958	1.018	0.938	0.967	0.851	0.039901	0.887	0.0163613	1.043	0.47874
A0A287B9L7	CLPTM1 like OS=Sus scrofa OX=9823 GN=CLPTM1L	CLPTM1L	55.802	2.6	1	1	1
A0A287B9N1	Plasminogen activator, urokinase receptor OS=Sus scrofa OX=9823 GN=PLAUR	PLAUR	35.785	14.5	3	4	3	1.03	0.986	1.013	1.008	0.977	0.903	0.976	1.146	0.986	0.953	0.23878	1.026	0.68698	1.076	0.30728
A0A287B9Q1	HEAT repeat containing 3 OS=Sus scrofa OX=9823 GN=HEATR3	HEATR3	74.475	4.9	3	5	3	1.152	1.17	0.971	1.079	0.909	0.945	0.827	1.005	0.938	0.891	0.21976	0.841	0.104796	0.944	0.49622
A0A287B9Q4	DEAD-box helicase 47 OS=Sus scrofa OX=9823 GN=DDX47	DDX47	49.536	13.3	5	6	5	0.933	0.927	1.037	0.899	0.958	1.034	1.077	1.133	1.019	0.998	0.96726	1.115	0.083758	1.117	0.093337
A0A287B9R0	Phosphatidylinositol-4,5-bisphosphate 3-kinase catalytic subunit beta OS=Sus scrofa OX=9823 GN=PIK3CB	PIK3CB	116.31	8.5	9	11	7	0.971	0.937	0.928	1.106	1.109	1.073	0.895	0.937	1.059	1.159	0.00104065	1.019	0.76248	0.879	0.062981
A0A287B9R2	Matrix metalloproteinase OS=Sus scrofa OX=9823 GN=MMP14	MMP14	56.708	4.4	2	2	2
A0A287B9S4	PYM homolog 1, exon junction complex associated factor OS=Sus scrofa OX=9823 GN=PYM1	PYM1	22.736	25.1	4	7	4	1.047	1.045	0.891	1.197	1.084	1.054	0.921	1.031	0.756	1.118	0.162177	0.908	0.38736	0.812	0.094698
A0A287B9T3	Uncharacterized protein OS=Sus scrofa OX=9823 GN=RTP4	RTP4	59.725	10	3	3	3	1.165	1.109	1.061	0.972	0.932	0.907	0.985	0.987	0.903	0.843	0.0071582	0.862	0.020359	1.023	0.56854
A0A287B9T5	Uncharacterized protein OS=Sus scrofa OX=9823 GN=CBX3	CBX3	19.678	30.6	5	14	4	0.982	1.064	0.981	0.974	1.074	0.97	1.003	0.889	0.977	0.997	0.94106	0.948	0.29894	0.951	0.36242
A0A287B9W3	Dynein cytoplasmic 1 heavy chain 1 OS=Sus scrofa OX=9823 GN=DYNC1H1	DYNC1H1	428.4	32.7	109	199	109	1.006	1.001	1.021	0.997	0.992	0.987	1.007	1	1.005	0.983	0.05914	0.995	0.44968	1.012	0.02816
A0A287B9W9	Epidermal growth factor receptor pathway substrate 15 like 1 OS=Sus scrofa OX=9823 GN=EPS15L1	EPS15L1	83.1	28.1	17	21	17	0.991	1.011	1	0.99	0.974	1.006	0.994	1.037	1.009	0.989	0.38198	1.013	0.41392	1.024	0.20876
A0A287B9X9	Uncharacterized protein OS=Sus scrofa OX=9823	---	35.422	46	15	43	5	1.366	1.33	1.213	0.892	0.879	0.854	0.88	0.884	0.883	0.672	0.00048149	0.677	0.0084788	1.008	0.57628
A0A287B9Y4	UPF1, RNA helicase and ATPase OS=Sus scrofa OX=9823 GN=UPF1	UPF1	115.94	20.7	19	21	19	0.991	0.965	1.016	1.036	1	0.998	1.013	0.97	0.971	1.021	0.3411	0.994	0.78352	0.974	0.22638
A0A287B9Y7	Inosine triphosphate pyrophosphatase OS=Sus scrofa OX=9823 GN=ITPA	ITPA	22.988	32.5	5	7	5	1.033	1.081	1.033	1.015	0.94	1.168	0.892	0.939	0.916	0.992	0.86882	0.873	0.0030375	0.88	0.129376
A0A287B9Y9	RNA binding motif protein 26 OS=Sus scrofa OX=9823 GN=RBM26	RBM26	110.98	7.2	6	7	5	1.006	1.047	1.037	0.94	1.003	1.056	1.003	0.951	0.969	0.971	0.4365	0.946	0.047556	0.975	0.54072
A0A287B9Z0	MAF bZIP transcription factor B OS=Sus scrofa OX=9823 GN=MAFB	MAFB	35.718	5.6	2	2	2	1.147	0.984	0.948	0.93	1.048	0.97	1.004	0.962	1.029	0.957	0.57678	0.973	0.70982	1.016	0.69932
A0A287BA09	Frataxin OS=Sus scrofa OX=9823 GN=FXN	FXN	20.147	4.9	1	1	1
A0A287BA12	Vacuolar protein sorting 4 homolog B OS=Sus scrofa OX=9823 GN=VPS4B	VPS4B	49.44	17.8	8	11	7	0.989	1.006	1.018	0.996	0.99	0.997	0.951	0.968	1.046	0.99	0.31554	0.984	0.60908	0.994	0.83562
A0A287BA23	Acetyl-coenzyme A synthetase OS=Sus scrofa OX=9823 GN=ACSS1	ACSS1	73.521	12.8	7	10	7	0.989	1.007	1.074	1	0.987	0.954	0.991	0.993	0.989	0.958	0.21272	0.968	0.33582	1.011	0.51596
A0A287BA35	KIAA2013 OS=Sus scrofa OX=9823 GN=KIAA2013	KIAA2013	69.31	4	2	2	2
A0A287BA45	Succinate--CoA ligase [GDP-forming] subunit beta, mitochondrial OS=Sus scrofa OX=9823 GN=SUCLG2	SUCLG2	44.836	41.7	18	44	18	1.029	1.043	1.065	1.024	0.995	0.985	0.961	1.019	0.913	0.958	0.047521	0.922	0.069618	0.963	0.31798
A0A287BA69	Phosphatidylinositol 4-kinase beta OS=Sus scrofa OX=9823 GN=PI4KB	PI4KB	82.542	2.6	2	2	2	1.479	1.359	1.14	0.604	0.681	0.665	0.973	1.126	1.011	0.49	0.00113595	0.782	0.051621	1.595	0.00122128
A0A287BA83	General transcription factor IIH subunit 1 OS=Sus scrofa OX=9823 GN=GTF2H1	GTF2H1	51.073	5.5	2	2	2	0.912	0.967	1.006	0.968	1.122	1.122	0.942	0.942	1.024	1.113	0.136324	1.008	0.85116	0.905	0.158596
A0A287BAA0	SAM and SH3 domain containing 1 OS=Sus scrofa OX=9823 GN=SASH1	SASH1	118.35	9	8	9	8	1.029	0.993	0.991	0.883	0.95	0.994	1.073	0.946	1.064	0.938	0.151544	1.023	0.63942	1.091	0.181103
A0A287BAA6	Solute carrier family 12 member 4 OS=Sus scrofa OX=9823 GN=SLC12A4	SLC12A4	100.47	1.1	1	1	1
A0A287BAB5	Uncharacterized protein OS=Sus scrofa OX=9823	---	10.086	41.9	3	3	3	1.035	1.067	1.035	0.893	1.088	0.981	0.974	0.988	0.95	0.944	0.35492	0.928	0.0082596	0.983	0.82292
A0A287BAS4	SR-related CTD associated factor 8 OS=Sus scrofa OX=9823 GN=SCAF8	SCAF8	117	3.1	2	3	2
A0A287BAS8	Transcription factor EC OS=Sus scrofa OX=9823 GN=TFEC	TFEC	35.3	5.4	2	2	2	1.061	1.133	0.949	0.898	0.957	1.001	0.99	1.026	1.002	0.909	0.195242	0.96	0.51096	1.057	0.16664
A0A287BAT2	Ubiquitin specific peptidase 9, X-linked OS=Sus scrofa OX=9823 GN=USP9X	USP9X	290.35	15.6	35	54	35	1.032	1.038	0.997	0.992	0.992	0.995	0.988	1.001	0.99	0.971	0.148701	0.971	0.093519	1	0.99722
A0A287BAW0	Uncharacterized protein OS=Sus scrofa OX=9823 GN=NDUFA5	NDUFA5	13.45	17.2	3	4	3	1.009	0.975	0.945	1.043	1.024	1.082	0.966	0.991	0.987	1.075	0.043616	1.005	0.80528	0.935	0.020439
A0A287BAX0	Retinoic acid receptor alpha OS=Sus scrofa OX=9823 GN=RARA	RARA	50.861	2.2	1	2	1	1.08	0.963	1.088	0.943	0.968	0.912	1.045	1.231	0.798	0.902	0.076542	0.982	0.81836	1.089	0.63892
A0A287BAX8	Eukaryotic translation initiation factor 3 subunit J OS=Sus scrofa OX=9823 GN=EIF3J	EIF3J	23.684	33.5	7	13	7	0.954	0.945	0.99	0.97	0.939	0.962	1.071	1.003	1.064	0.994	0.73928	1.086	0.030857	1.093	0.0183382
A0A287BAX9	Smith-Magenis syndrome chromosome region, candidate 8 OS=Sus scrofa OX=9823 GN=SMCR8	SMCR8	103.78	2.5	2	2	2	0.873	0.598	1.252	1.214	0.642	1.163	1.404	1.243	0.637	1.109	0.73158	1.206	0.61526	1.088	0.84218
A0A287BAZ2	Rho GTPase activating protein 17 OS=Sus scrofa OX=9823 GN=ARHGAP17	ARHGAP17	90.393	11.5	9	17	9	1.004	0.949	0.985	1.009	1.059	1.005	0.956	1.024	1.012	1.046	0.129695	1.018	0.53924	0.974	0.3771
A0A287BAZ6	Peroxiredoxin 2 OS=Sus scrofa OX=9823 GN=PRDX2	PRDX2	21.88	50.5	10	30	10	0.996	1.008	0.965	1.049	0.989	1.001	0.995	0.975	1.015	1.024	0.3555	1.005	0.77184	0.982	0.45348
A0A287BB01	Reticulon OS=Sus scrofa OX=9823 GN=RTN3	RTN3	25.308	8.1	2	3	2	1.163	1.067	1.049	0.93	0.997	1.104	0.871	0.953	0.888	0.924	0.24716	0.827	0.0107428	0.895	0.1263
A0A287BB05	VPS35 endosomal protein sorting factor like OS=Sus scrofa OX=9823 GN=VPS35L	VPS35L	109.35	8.7	7	10	7	0.938	0.855	1.067	1.005	1.027	1.056	0.978	0.976	1.057	1.08	0.28762	1.053	0.47304	0.975	0.43782
A0A287BB12	DCN1-like protein OS=Sus scrofa OX=9823 GN=DCUN1D1	DCUN1D1	29.993	22.5	5	9	5	0.943	0.976	1.044	1.037	0.978	0.905	1.02	1.049	1.035	0.985	0.77298	1.048	0.2011	1.063	0.194937
A0A287BB17	Uncharacterized protein OS=Sus scrofa OX=9823 GN=TAF1	TAF1	179.9	1.4	2	2	2	1.055	0.985	0.948	0.949	0.918	0.87	0.938	1.116	1.247	0.916	0.095644	1.105	0.3492	1.206	0.104657
A0A287BB19	RAN binding protein 3 OS=Sus scrofa OX=9823 GN=RANBP3	RANBP3	62.493	15.5	8	10	1	1.005	1.109	0.977	1.13	1.018	0.967	0.868	0.934	1.006	1.008	0.9111	0.908	0.168281	0.901	0.17356
A0A287BB21	Hexosyltransferase OS=Sus scrofa OX=9823 GN=CHSY1	CHSY1	89.113	3.9	2	2	2	1.153	0.954	1.206	0.793	0.856	0.996	1.138	1.068	0.857	0.798	0.084062	0.925	0.51144	1.158	0.25662
A0A287BB25	Galactokinase 2 OS=Sus scrofa OX=9823 GN=GALK2	GALK2	43.584	14.3	5	9	5	0.927	1.051	1.037	1.047	0.95	0.916	1.02	0.99	1.07	0.966	0.57394	1.022	0.65058	1.057	0.28302
A0A287BB44	Multimerin 2 OS=Sus scrofa OX=9823 GN=MMRN2	MMRN2	102.82	4.9	3	3	3
A0A287BB73	Uncharacterized protein OS=Sus scrofa OX=9823 GN=CCDC88C	CCDC88C	206.96	2	4	4	4	0.953	0.99	0.878	0.924	0.946	0.929	1.163	1.086	1.077	0.992	0.86324	1.179	0.018356	1.188	0.0024643
A0A287BB82	RNA polymerase III subunit E OS=Sus scrofa OX=9823 GN=POLR3E	POLR3E	84.602	1.1	1	1	1	1.133	0.967	0.996	0.925	0.979	0.975	1.069	0.859	1.112	0.93	0.24576	0.982	0.82516	1.056	0.58774
A0A287BBC0	P-selectin precursor OS=Sus scrofa OX=9823 GN=SELP	SELP	71.1	10.7	6	9	6	0.875	1.038	0.945	0.832	1.021	0.952	1.148	1.04	1.072	0.981	0.8112	1.141	0.081064	1.162	0.08378
A0A287BBE2	Signal transducer and activator of transcription OS=Sus scrofa OX=9823 GN=STAT3	STAT3	81.238	27.7	17	36	17	1.009	0.986	1.022	0.985	1.004	0.968	1.01	1.003	1.028	0.98	0.24822	1.008	0.56674	1.028	0.094123
A0A287BBE9	TBC1 domain family member 9B OS=Sus scrofa OX=9823 GN=TBC1D9B	TBC1D9B	122.82	10.8	10	11	10	0.848	0.939	1.015	1.016	1.072	0.996	1.06	1.064	1.066	1.101	0.157458	1.138	0.126122	1.034	0.25992
A0A287BBF2	Ubiquitin associated and SH3 domain containing B OS=Sus scrofa OX=9823 GN=UBASH3B	UBASH3B	64.656	20.1	10	16	10	1.017	0.995	0.992	1.01	1.056	1.008	1.024	0.978	0.968	1.023	0.25198	0.989	0.57354	0.966	0.20836
A0A287BBF8	Mediator of RNA polymerase II transcription subunit 6 OS=Sus scrofa OX=9823 GN=MED6	MED6	28.435	7.3	2	2	2	0.948	1.006	1.076	0.913	0.984	0.96	1.036	1.011	1.073	0.943	0.24644	1.03	0.49538	1.092	0.034444
A0A287BBN7	Slingshot protein phosphatase 1 OS=Sus scrofa OX=9823 GN=SSH1	SSH1	97.367	3.3	2	2	2	1.035	1.021	1.037	1.132	0.994	0.91	0.939	0.958	0.989	0.982	0.75606	0.933	0.011918	0.951	0.51194
A0A287BBP8	ArfGAP with coiled-coil, ankyrin repeat and PH domains 2 OS=Sus scrofa OX=9823 GN=ACAP2	ACAP2	87.994	28.5	17	25	17	1.005	0.991	1.03	0.993	0.933	1.001	0.999	0.999	1.034	0.967	0.24872	1.002	0.9082	1.036	0.22786
A0A287BBR9	Poly(U) binding splicing factor 60 OS=Sus scrofa OX=9823 GN=PUF60	PUF60	61.188	25.1	15	21	15	1.034	1.024	1.029	1.015	0.991	1.024	0.932	0.952	1.005	0.982	0.139685	0.936	0.098158	0.953	0.121203
A0A287BBS6	Catenin delta 1 OS=Sus scrofa OX=9823 GN=CTNND1	CTNND1	104.02	32.5	26	51	26	0.996	1.002	0.95	1.011	1.029	1.029	1.015	1.008	1.002	1.041	0.085964	1.026	0.20568	0.986	0.107098
A0A287BBS9	Glucosamine 6-phosphate N-acetyltransferase OS=Sus scrofa OX=9823 GN=GNPNAT1	GNPNAT1	18.435	4.3	1	1	1
A0A287BBV0	Histone PARylation factor 1 OS=Sus scrofa OX=9823 GN=HPF1	HPF1	35.906	12.8	4	5	4	1.143	0.983	1.01	0.964	0.993	0.979	0.931	1.001	1.04	0.936	0.2479	0.948	0.40582	1.012	0.7552
A0A287BBX1	Thymocyte selection associated high mobility group box OS=Sus scrofa OX=9823 GN=TOX	TOX	48.584	2.9	1	2	1	0.924	0.92	0.926	1.271	0.935	1.035	0.823	1.089	1.103	1.17	0.24128	1.088	0.5102	0.93	0.6091
A0A287BBX7	NIMA related kinase 3 OS=Sus scrofa OX=9823 GN=NEK3	NEK3	49.191	2.5	1	1	1	1.047	0.957	1.064	0.991	1.138	1.112	0.905	0.99	0.813	1.056	0.37298	0.883	0.125844	0.836	0.06378
A0A287BBX8	ArfGAP with RhoGAP domain, ankyrin repeat and PH domain 3 OS=Sus scrofa OX=9823 GN=ARAP3	ARAP3	148.94	2.8	3	3	1
A0A287BBX9	Craniofacial development protein 1 OS=Sus scrofa OX=9823 GN=CFDP1	CFDP1	33.437	9.4	3	6	3	0.992	0.921	0.96	1.02	1.011	0.967	1.072	1.016	1.057	1.044	0.189539	1.095	0.027796	1.049	0.10614
A0A287BBY6	Protein kinase C delta type OS=Sus scrofa OX=9823 GN=PRKCD	PRKCD	77.343	34.3	23	43	1
A0A287BBY9	Ubiquitin specific peptidase 28 OS=Sus scrofa OX=9823 GN=USP28	USP28	113.02	1	1	1	1	1.722	1.07	0.914	0.887	1.41	0.963	0.811	0.851	0.424	0.88	0.66312	0.563	0.118656	0.64	0.151119
A0A287BBZ9	Pleckstrin homology like domain family B member 1 OS=Sus scrofa OX=9823 GN=PHLDB1	PHLDB1	150.25	3.4	5	5	5	1.147	1.016	0.949	1.044	0.983	0.951	0.976	1.014	1.027	0.957	0.53698	0.969	0.6501	1.013	0.68796
A0A287BC37	SET domain containing 1A OS=Sus scrofa OX=9823 GN=SETD1A	SETD1A	110.28	1.4	1	2	1	0.935	0.992	1.02	1	1.001	0.972	0.929	1.038	1.125	1.009	0.75024	1.049	0.49698	1.04	0.5546
A0A287BC39	Raftlin, lipid raft linker 1 OS=Sus scrofa OX=9823 GN=RFTN1	RFTN1	53.824	14.1	9	11	8	1.014	0.999	1.054	0.963	0.975	1.029	1.034	0.968	0.94	0.967	0.26732	0.959	0.26304	0.992	0.81172
A0A287BC43	Eyes absent homolog OS=Sus scrofa OX=9823 GN=EYA3	EYA3	56.734	2.7	1	1	1
A0A287BCC4	Zinc finger BED-type containing 1 OS=Sus scrofa OX=9823 GN=ZBED1	ZBED1	78.692	4.5	2	2	2	1.11	1.021	1.152	1.008	0.794	0.887	0.923	1.017	1.11	0.819	0.059063	0.929	0.30612	1.134	0.21606
A0A287BCD1	Adhesion regulating molecule 1 OS=Sus scrofa OX=9823 GN=ADRM1	ADRM1	24.228	17.1	4	10	4	1.096	1.086	0.918	0.788	0.959	1.04	1.027	1.2	0.951	0.899	0.33592	1.025	0.80674	1.14	0.2814
A0A287BCF3	Uncharacterized protein OS=Sus scrofa OX=9823	---	35.001	4.3	1	1	1
A0A287BCG1	ASPSCR1, UBX domain containing tether for SLC2A4 OS=Sus scrofa OX=9823 GN=ASPSCR1	ASPSCR1	59.755	15.3	7	7	7	0.92	1.12	1.082	1	1.031	0.912	0.954	0.955	1.028	0.943	0.46846	0.941	0.42516	0.998	0.97784
A0A287BCI1	Zinc finger CCCH-type containing, antiviral 1 like OS=Sus scrofa OX=9823 GN=ZC3HAV1L	ZC3HAV1L	32.264	5.9	2	3	2
A0A287BCK2	Tripartite motif containing 56 OS=Sus scrofa OX=9823 GN=TRIM56	TRIM56	81.501	3.7	3	3	3	0.845	1.037	1.109	0.762	1.029	1.092	0.937	1.004	1.183	0.964	0.7753	1.044	0.69464	1.084	0.54144
A0A287BCK3	Inositol polyphosphate-5-phosphatase B OS=Sus scrofa OX=9823 GN=INPP5B	INPP5B	81.851	18.6	11	18	2
A0A287BCK9	Myelin expression factor 2 OS=Sus scrofa OX=9823 GN=MYEF2	MYEF2	62.354	10.4	5	5	5	0.96	1.051	1.017	0.954	0.955	1.012	1.029	1.027	1.006	0.965	0.33906	1.011	0.68904	1.048	0.08456
A0A287BCM3	Inhibitor of nuclear factor kappa-B kinase-interacting protein OS=Sus scrofa OX=9823 GN=IKBIP	IKBIP	39.398	8.6	3	4	2
A0A287BCN1	Tetraspanin OS=Sus scrofa OX=9823 GN=TSPAN15	TSPAN15	30.263	7.4	2	3	2	1.049	1.124	0.962	0.999	1.013	0.984	0.855	1.044	0.991	0.956	0.39696	0.922	0.33036	0.965	0.58048
A0A287BCP0	Tropomyosin alpha-1 chain OS=Sus scrofa OX=9823 GN=TPM1	TPM1	40.037	54.1	26	52	0
A0A287BCP2	Zinc fingers and homeoboxes protein 3 OS=Sus scrofa OX=9823 GN=ZHX3	ZHX3	103	2.3	1	1	1
A0A287BCR7	TOR signaling pathway regulator OS=Sus scrofa OX=9823 GN=TIPRL	TIPRL	27.486	17.1	4	4	4	1.04	1.052	1.131	1.021	1.021	1.002	0.983	0.825	0.931	0.944	0.10454	0.85	0.047043	0.9	0.173776
A0A287BCS5	Cleavage and polyadenylation specific factor 3 OS=Sus scrofa OX=9823 GN=CPSF3	CPSF3	71.527	7	4	4	4	1.113	0.983	1.004	0.944	1.048	1.029	0.968	0.92	1.008	0.975	0.63944	0.934	0.22218	0.959	0.37132
A0A287BCT2	Acyl-CoA thioesterase 4 OS=Sus scrofa OX=9823 GN=ACOT4	ACOT4	55.152	8.1	4	6	1	1.184	1.256	1.132	0.721	0.808	0.771	1.012	1.051	1.081	0.644	0.00059786	0.88	0.023484	1.367	0.00120103
A0A287BCT8	PHD finger protein 1 OS=Sus scrofa OX=9823 GN=PHF1	PHF1	59.416	1.7	1	1	1
A0A287BCW1	Xaa-Pro aminopeptidase 2 OS=Sus scrofa OX=9823 GN=XPNPEP2	XPNPEP2	73.022	4.1	2	3	2	0.946	0.837	0.828	1.167	1.016	1.039	1.039	1.052	1.099	1.234	0.025562	1.222	0.0117959	0.99	0.86448
A0A287BCW7	Fumarylacetoacetate hydrolase domain containing 1 OS=Sus scrofa OX=9823 GN=FAHD1	FAHD1	24.868	6.7	1	1	1
A0A287BCW8	Kinase OS=Sus scrofa OX=9823 GN=ITPKB	ITPKB	102.61	4.3	4	4	4	1.019	0.977	1.029	0.917	1.012	1.011	1.037	1.021	0.99	0.972	0.46544	1.008	0.73376	1.037	0.3558
A0A287BCX9	Transmembrane p24 trafficking protein 1 OS=Sus scrofa OX=9823 GN=TMED1	TMED1	25.262	9.7	2	3	2
A0A287BCY6	Growth arrest specific 1 OS=Sus scrofa OX=9823 GN=GAS1	GAS1	36.171	6	1	1	1
A0A287BD07	Uncharacterized protein OS=Sus scrofa OX=9823 GN=DHX38	DHX38	135.81	1.5	3	3	3	1.105	0.942	0.997	1.016	0.981	0.896	1.134	0.94	1.007	0.95	0.44998	1.012	0.88338	1.065	0.4078
A0A287BD23	Protein O-fucosyltransferase 2 OS=Sus scrofa OX=9823 GN=POFUT2	POFUT2	49.19	10.3	4	4	4	1.089	1.156	1.018	0.923	0.932	0.983	0.989	1.008	0.919	0.87	0.029098	0.894	0.073002	1.027	0.4798
A0A287BD27	Phosphoinositide phospholipase C OS=Sus scrofa OX=9823 GN=PLCG1	PLCG1	135.95	6	7	9	7	1.053	1.047	1.041	1.012	0.956	1.058	0.964	0.999	0.959	0.963	0.3255	0.93	0.0054627	0.966	0.34474
A0A287BD36	Bromodomain adjacent to zinc finger domain 2A OS=Sus scrofa OX=9823 GN=BAZ2A	BAZ2A	182.84	0.7	1	1	1
A0A287BD52	Calcium uptake protein 1, mitochondrial OS=Sus scrofa OX=9823 GN=MICU1	MICU1	47.644	4.8	2	2	2
A0A287BD60	Tripeptidyl peptidase 2 OS=Sus scrofa OX=9823 GN=TPP2	TPP2	140.41	25.2	29	38	1
A0A287BD81	RAB27B, member RAS oncogene family OS=Sus scrofa OX=9823 GN=RAB27B	RAB27B	24.592	19.7	5	5	5	0.911	0.785	0.812	0.978	1.123	0.984	1.127	1.037	1.259	1.23	0.031436	1.365	0.0126167	1.11	0.22656
A0A287BDA0	Translocase of inner mitochondrial membrane 21 OS=Sus scrofa OX=9823 GN=TIMM21	TIMM21	27.647	9.5	2	2	2	0.939	1.341	1.255	0.945	0.973	1.008	0.927	0.87	0.733	0.828	0.184344	0.716	0.065223	0.865	0.107759
A0A287BDB9	SWI/SNF related, matrix associated, actin dependent regulator of chromatin, subfamily b, member 1 OS=Sus scrofa OX=9823 GN=SMARCB1	SMARCB1	37.706	9.1	3	3	3
A0A287BDC6	Pyridoxamine 5'-phosphate oxidase OS=Sus scrofa OX=9823 GN=PNPO	PNPO	12.296	13.4	1	1	1	1.13	0.986	0.913	0.938	0.952	1.074	0.822	1.157	1.066	0.979	0.80806	1.005	0.993	1.027	0.87632
A0A287BDE2	Glutamate-cysteine ligase catalytic subunit OS=Sus scrofa OX=9823 GN=GCLC	GCLC	68.573	13.8	7	11	0
A0A287BDF9	Olfactory receptor OS=Sus scrofa OX=9823	---	34.823	2.6	1	1	1
A0A287BDG7	Acyl-CoA thioesterase 11 OS=Sus scrofa OX=9823 GN=ACOT11	ACOT11	63.845	1.8	1	1	1
A0A287BDI2	Uncharacterized protein OS=Sus scrofa OX=9823 GN=LOC100154047	LOC100154047	28.764	21.2	5	5	5
A0A287BDJ1	Septin 7 OS=Sus scrofa OX=9823 GN=SEPT7	SEPT7	50.566	53.9	24	80	1
A0A287BDJ6	Latent transforming growth factor beta binding protein 2 OS=Sus scrofa OX=9823 GN=LTBP2	LTBP2	186.68	6.4	9	10	9	1.014	1.271	1.224	0.841	0.817	0.753	1.063	1	0.993	0.687	0.0086035	0.871	0.141079	1.268	0.0038568
A0A287BDK1	Uncharacterized protein OS=Sus scrofa OX=9823	---	27.828	3.6	1	2	1
A0A287BDP1	Jagunal homolog 1 OS=Sus scrofa OX=9823 GN=JAGN1	JAGN1	16.736	8.1	1	2	1	1.481	1.407	0.98	1.024	1.15	0.856	0.697	0.846	0.592	0.783	0.20534	0.552	0.023825	0.705	0.058
A0A287BDR9	SET domain containing 1A OS=Sus scrofa OX=9823 GN=SETD1A	SETD1A	111.03	1	1	1	1	1.066	1.211	0.769	0.999	0.993	1.072	0.901	1.061	0.954	1.006	0.87556	0.957	0.85336	0.952	0.3953
A0A287BDU1	Cell cycle associated protein 1 OS=Sus scrofa OX=9823 GN=CAPRIN1	CAPRIN1	74.555	11	7	16	7	0.982	1.004	0.956	1.011	1.048	1.05	1.01	0.998	0.991	1.057	0.042196	1.019	0.27204	0.965	0.056442
A0A287BDU4	Disco interacting protein 2 homolog C OS=Sus scrofa OX=9823 GN=DIP2C	DIP2C	170.61	3.3	4	4	3	0.896	0.924	1.027	1.077	0.989	0.976	1.012	0.966	1.141	1.068	0.26364	1.096	0.23364	1.025	0.70836
A0A287BDW2	Erythrocyte membrane protein band 4.1 OS=Sus scrofa OX=9823 GN=EPB41	EPB41	92.895	29.1	19	33	1	0.996	0.984	1.018	1.048	0.963	1.022	1.017	0.945	1.021	1.012	0.70232	0.995	0.8476	0.984	0.66414
A0A287BDX9	Mediator of RNA polymerase II transcription subunit 17 OS=Sus scrofa OX=9823 GN=MED17	MED17	72.827	4.3	3	3	3	0.958	0.961	1.002	0.979	1.03	1.049	1.028	0.945	1.057	1.047	0.144799	1.037	0.3849	0.991	0.8145
A0A287BE09	Branched-chain-amino-acid aminotransferase OS=Sus scrofa OX=9823 GN=BCAT1	BCAT1	40.436	6.6	2	2	2	0.981	0.944	0.975	0.97	0.93	0.98	1.082	1.004	1.148	0.993	0.74248	1.115	0.056779	1.123	0.052261
A0A287BE16	Putative monooxygenase p33MONOX OS=Sus scrofa OX=9823 GN=KIAA1191	KIAA1191	31.158	6.6	2	2	2
A0A287BE21	Bcl-2-associated transcription factor 1 OS=Sus scrofa OX=9823 GN=BCLAF1	BCLAF1	106.31	22.6	20	32	19	1.013	1.026	1.073	1.019	1.012	0.998	0.97	0.97	0.958	0.973	0.22134	0.931	0.0167245	0.957	0.003943
A0A287BE23	Superoxide dismutase [Cu-Zn] OS=Sus scrofa OX=9823 GN=CCS	CCS	24.084	11.1	3	5	3	0.965	0.968	0.959	1.004	0.973	1.003	1	1.04	1.105	1.03	0.04858	1.087	0.104462	1.055	0.159622
A0A287BE26	Mitochondrial ribosomal protein L51 OS=Sus scrofa OX=9823 GN=MRPL51	MRPL51	15.217	8.6	1	1	1
A0A287BE42	NIMA related kinase 7 OS=Sus scrofa OX=9823 GN=NEK7	NEK7	34.595	13.2	4	6	4	1.077	0.915	0.968	1.154	1.037	1.047	0.895	0.906	0.913	1.094	0.196721	0.917	0.22138	0.838	0.0071608
A0A287BE46	Protein quaking OS=Sus scrofa OX=9823 GN=QKI	QKI	36.925	25.2	7	13	7	0.957	0.971	0.936	1.052	0.999	1.017	1.018	1.04	1.02	1.071	0.020742	1.075	0.0047008	1.003	0.84626
A0A287BE50	Zinc finger FYVE-type containing 21 OS=Sus scrofa OX=9823 GN=ZFYVE21	ZFYVE21	25.996	7.7	2	2	2
A0A287BE52	PC4 and SFRS1-interacting protein OS=Sus scrofa OX=9823 GN=PSIP1	PSIP1	26.25	32.8	7	8	7	0.998	1.034	0.982	1.028	1.025	1.072	0.989	0.95	0.92	1.037	0.160277	0.949	0.109962	0.915	0.024779
A0A287BE64	WWC family member 3 OS=Sus scrofa OX=9823 GN=WWC3	WWC3	118.94	1	1	1	1	0.981	0.86	1.167	0.915	0.88	0.949	0.997	1.018	1.247	0.912	0.40598	1.084	0.50208	1.189	0.087242
A0A287BE83	Epidermal growth factor receptor pathway substrate 15 OS=Sus scrofa OX=9823 GN=EPS15	EPS15	96.866	24.8	19	32	19	0.966	1.005	0.996	1.02	0.973	0.996	1.029	0.982	1.031	1.007	0.70622	1.025	0.2802	1.018	0.45024
A0A287BEA0	Disintegrin and metalloproteinase domain-containing protein 17 OS=Sus scrofa OX=9823 GN=ADAM17	ADAM17	79.066	11.4	8	8	8	1.024	1.063	0.957	1.07	0.949	0.99	0.985	1.008	1.001	0.989	0.81192	0.984	0.64492	0.995	0.92052
A0A287BEC7	Vesicle associated membrane protein 3 OS=Sus scrofa OX=9823 GN=VAMP3	VAMP3	15.263	29.4	4	9	1	1.068	0.928	0.98	0.99	0.998	1.004	1.016	1.042	0.997	1.005	0.88	1.027	0.55302	1.021	0.197984
A0A287BED1	Prefoldin subunit 1 OS=Sus scrofa OX=9823 GN=PFDN1	PFDN1	14.237	23.8	3	6	3	1.023	1.035	0.943	0.991	1.063	1	0.967	0.961	1.032	1.018	0.65132	0.986	0.7357	0.969	0.37934
A0A287BED6	Bifunctional epoxide hydrolase 2 OS=Sus scrofa OX=9823 GN=EPHX2	EPHX2	51.536	7.8	3	5	3	1.103	1.024	0.939	0.993	1.016	1.175	0.936	1.028	0.813	1.038	0.62554	0.906	0.2864	0.872	0.183162
A0A287BED9	Moesin OS=Sus scrofa OX=9823 GN=MSN	MSN	67.786	46.4	38	166	29	0.966	0.986	0.983	0.997	1.021	1.016	1.012	1.005	1.002	1.034	0.026464	1.029	0.0158778	0.995	0.56418
A0A287BEE4	Endo-beta-N-acetylglucosaminidase OS=Sus scrofa OX=9823 GN=ENGASE	ENGASE	81.832	5.3	3	3	3	1.089	0.906	0.816	1.017	1.086	0.989	0.981	1.052	1.094	1.1	0.31596	1.112	0.27948	1.011	0.80718
A0A287BEG1	Ataxin 10 OS=Sus scrofa OX=9823 GN=ATXN10	ATXN10	46.89	19.7	7	9	7	0.861	1.008	1.062	1.051	0.964	0.945	1.017	1.107	1.033	1.01	0.86694	1.077	0.31946	1.067	0.19552
A0A287BEH4	Uncharacterized protein OS=Sus scrofa OX=9823 GN=FAHD2B	FAHD2B	33.363	10.2	3	4	1	1.024	1.028	1.038	0.983	0.935	0.972	1.054	0.952	1.026	0.935	0.0128752	0.981	0.58432	1.049	0.23694
A0A287BEH6	PDZ and LIM domain 7 OS=Sus scrofa OX=9823 GN=PDLIM7	PDLIM7	55.287	31.3	14	27	13	1.043	1	1.077	0.992	1.022	1.066	0.946	0.957	0.918	0.987	0.68932	0.904	0.0154803	0.916	0.022622
A0A287BEJ1	Ubiquitin carboxyl-terminal hydrolase 16 OS=Sus scrofa OX=9823 GN=USP16	USP16	93.065	7.9	5	5	5	0.96	1.03	1.105	1.041	1.02	1.007	1.06	0.939	1.007	0.991	0.8713	0.971	0.62062	0.98	0.58598
A0A287BEJ4	Uncharacterized protein OS=Sus scrofa OX=9823 GN=VPS33B	VPS33B	70.755	12.2	8	8	8	1.017	1.021	1.045	1.049	1.025	0.914	0.977	0.98	1.041	0.969	0.48942	0.972	0.27354	1.003	0.92566
A0A287BEK4	NADH:ubiquinone oxidoreductase subunit V3 OS=Sus scrofa OX=9823 GN=NDUFV3	NDUFV3	43.166	46.3	14	20	14	1.073	0.937	0.976	0.998	0.99	0.984	0.987	1.011	1.014	0.995	0.9459	1.009	0.8156	1.013	0.23266
A0A287BEL8	Zinc finger FYVE-type containing 1 OS=Sus scrofa OX=9823 GN=ZFYVE1	ZFYVE1	80.393	4	3	3	3	1.255	1.286	0.871	1.16	0.796	0.922	0.886	0.902	0.954	0.843	0.37346	0.804	0.186221	0.953	0.75874
A0A287BEN8	DExD/H-box helicase 60 OS=Sus scrofa OX=9823 GN=DDX60	DDX60	190.58	4.1	5	7	5	0.998	0.933	0.913	1.053	0.992	1.018	1.057	1.062	0.995	1.077	0.079402	1.095	0.055623	1.017	0.57932
A0A287BEQ3	Histone-lysine N-methyltransferase OS=Sus scrofa OX=9823 GN=SETDB1	SETDB1	137.14	1.5	2	2	2	1.098	1.041	0.942	0.928	1.059	0.914	1.034	1.052	0.955	0.942	0.40416	0.987	0.83544	1.048	0.43132
A0A287BER5	Branched-chain-amino-acid aminotransferase OS=Sus scrofa OX=9823 GN=BCAT2	BCAT2	44.585	19.6	7	9	7	1.085	0.994	1.038	0.941	0.994	0.965	0.984	0.981	0.994	0.93	0.073917	0.949	0.182457	1.02	0.2801
A0A287BER7	Integrin subunit alpha 8 OS=Sus scrofa OX=9823 GN=ITGA8	ITGA8	113.61	4.6	5	8	5	0.993	0.901	0.996	1.049	1.036	0.988	0.952	1.016	1.086	1.063	0.174139	1.057	0.33694	0.994	0.8707
A0A287BES1	Mitogen-activated protein kinase OS=Sus scrofa OX=9823 GN=MAPK8	MAPK8	43.978	7	2	2	2	0.925	0.907	0.939	1.005	1.006	0.994	1.042	1.085	1.114	1.084	0.00164477	1.17	0.0020216	1.079	0.0191211
A0A287BES3	Transmembrane protein 33 OS=Sus scrofa OX=9823 GN=TMEM33	TMEM33	27.793	4.1	1	2	1	1.011	1.019	0.94	0.95	0.99	0.978	1.064	0.997	1.067	0.982	0.57896	1.053	0.20012	1.072	0.052343
A0A287BET5	Uncharacterized protein OS=Sus scrofa OX=9823 GN=ALYREF	ALYREF	26.869	33.6	7	11	7	0.987	1.073	1.04	1.066	0.982	1.017	0.917	0.965	0.932	0.989	0.75604	0.908	0.028137	0.918	0.039003
A0A287BEU1	Transcription factor BTF3 OS=Sus scrofa OX=9823 GN=BTF3L4	BTF3L4	17.27	45.6	6	7	5	1.118	1.001	1.145	0.912	0.948	0.924	1.025	0.968	0.931	0.853	0.021421	0.896	0.094296	1.05	0.183721
A0A287BEU8	C-X-C motif chemokine 16 OS=Sus scrofa OX=9823 GN=CXCL16	CXCL16	24.366	3.6	1	1	1
A0A287BEW1	FERM domain containing 8 OS=Sus scrofa OX=9823 GN=FRMD8	FRMD8	43.317	11.3	4	5	4	0.816	0.951	1.01	1.085	0.867	1.169	1.066	1.024	1.021	1.124	0.36274	1.12	0.145315	0.997	0.96526
A0A287BEY3	Uncharacterized protein OS=Sus scrofa OX=9823 GN=LOC100624077	LOC100624077	40.383	9	3	6	3	1.106	0.992	0.994	0.992	1.078	0.932	0.882	0.947	1.095	0.971	0.61666	0.946	0.46726	0.974	0.72662
[truncated: 4,146 more rows]

## Sheet: Table S2
Groups	Protein accession	Protein description	SR/SC Ratio	Regulated Type	SR/SC P value	Gene name	MW [kDa]	Score	Coverage [%]	Peptides	PSMs	Unique peptides	SC_1	SC_2	SC_3	SR_1	SR_2	SR_3	SS_1	SS_2	SS_3	Subcellular localization	Biological Process	Cellular Component	Molecular Function	KEGG KO No.	KEGG Gene	KEGG pathway	IPR ID	Domain description
SR vs SC	D2ST34	F-box and leucine-rich repeat protein 4 OS=Sus scrofa OX=9823 GN=FBXL4	3.495	Up	0.00068202	FBXL4	70.275	-2	1.6	1	1	1	0.496	0.694	0.455	1.862	2.05	1.837	0.558	0.568	0.475	mitochondria		GO:0043229 intracellular organelle; GO:0044429 mitochondrial part; GO:0031967 organelle envelope; GO:0005737 cytoplasm; GO:0044446 intracellular organelle part; GO:0031981 nuclear lumen; GO:0044424 intracellular part; GO:0005623 cell; GO:0016604 nuclear body; GO:0005739 mitochondrion; GO:0044422 organelle part; GO:0005740 mitochondrial envelope; GO:0031974 membrane-enclosed lumen; GO:0043226 orga…	GO:0005515 protein binding; GO:0005488 binding;	K10270			IPR001810; IPR032675;	F-box domain; Leucine-rich repeat domain, L domain-like;
	A0A287APG5	Uncharacterized protein OS=Sus scrofa OX=9823	3.471	Up	0.03758	---	31.446	1.3968	3.5	1	1	1	0.492	0.504	0.508	1.869	1.043	2.309	0.839	0.761	0.7	mitochondria
	A0A286ZW74	Round spermatid basic protein 1 OS=Sus scrofa OX=9823 GN=RSBN1	3.454	Up	6.1061e-07	RSBN1	82.998	-2	0.9	1	2	1	0.53	0.554	0.545	1.875	1.801	1.95	0.573	0.597	0.58	nucleus
	I3L728	Uncharacterized protein OS=Sus scrofa OX=9823	3.106	Up	1.8802e-06	---	15.057	7.4346	27.7	3	6	1	0.531	0.509	0.479	1.605	1.544	1.569	1.008	0.893	0.873	extracellular	GO:0002376 immune system process; GO:0002377 immunoglobulin production; GO:0002440 production of molecular mediator of immune response; GO:0006955 immune response; GO:0050896 response to stimulus;	GO:0005615 extracellular space; GO:0044421 extracellular region part; GO:0005576 extracellular region;	GO:0005515 protein binding; GO:0005488 binding;				IPR007110; IPR013783; IPR013106; IPR003599;	Immunoglobulin-like domain; Immunoglobulin-like fold; Immunoglobulin V-set domain; Immunoglobulin subtype;
	F1S9C0	Serum amyloid A protein OS=Sus scrofa OX=9823 GN=SAA2	2.712	Up	0.00022438	SAA2	10.053	9.2424	43.3	4	5	4	0.364	0.408	0.476	1.09	1.14	1.155	1.467	1.417	1.468	cytoplasm	GO:0032270 positive regulation of cellular protein metabolic process; GO:0051674 localization of cell; GO:0023051 regulation of signaling; GO:1902533 positive regulation of intracellular signal transduction; GO:0044699 single-organism process; GO:0044255 cellular lipid metabolic process; GO:0019216 regulation of lipid metabolic process; GO:0044237 cellular metabolic process; GO:0051253 negative r…	GO:0005615 extracellular space; GO:0044421 extracellular region part; GO:0032994 protein-lipid complex; GO:1990777 lipoprotein particle; GO:0034358 plasma lipoprotein particle; GO:0032991 macromolecular complex; GO:0034364 high-density lipoprotein particle; GO:0005576 extracellular region;	GO:0042056 chemoattractant activity;
	A0A287B4C9	Matrix remodeling associated 8 OS=Sus scrofa OX=9823 GN=MXRA8	2.653	Up	1.8212e-05	MXRA8	43.427	3.7306	7.8	3	3	3	0.61	0.659	0.671	1.624	1.763	1.759	0.69	0.602	0.617	cytoplasm			GO:0005515 protein binding; GO:0005488 binding;				IPR007110; IPR013783; IPR013106; IPR003599;	Immunoglobulin-like domain; Immunoglobulin-like fold; Immunoglobulin V-set domain; Immunoglobulin subtype;
	Q8SPS7	Haptoglobin OS=Sus scrofa OX=9823 GN=HP	2.183	Up	1.98891e-05	HP	38.481	105.99	43.8	17	49	17	0.486	0.468	0.513	1.029	1.07	1.103	1.394	1.412	1.383	extracellular	GO:0050794 regulation of cellular process; GO:0044700 single organism signaling; GO:0007166 cell surface receptor signaling pathway; GO:0098542 defense response to other organism; GO:0044699 single-organism process; GO:0043207 response to external biotic stimulus; GO:0050896 response to stimulus; GO:0051707 response to other organism; GO:0071704 organic substance metabolic process; GO:0009607 res…	GO:0005615 extracellular space; GO:0044421 extracellular region part; GO:0005576 extracellular region;	GO:0004252 serine-type endopeptidase activity; GO:0004175 endopeptidase activity; GO:0008233 peptidase activity; GO:0003824 catalytic activity; GO:0017171 serine hydrolase activity; GO:0005488 binding; GO:0008236 serine-type peptidase activity; GO:0016209 antioxidant activity; GO:0030492 hemoglobin binding; GO:0070011 peptidase activity, acting on L-amino acid peptides; GO:0005515 protein binding…	K16142			IPR009003; IPR000436; IPR001254;	Peptidase S1, PA clan; Sushi/SCR/CCP domain; Serine proteases, trypsin domain;
	F1RIP3	Ferritin OS=Sus scrofa OX=9823 GN=FTL	2.041	Up	0.022402	FTL	19.992	128.41	55.7	7	20	5	0.717	0.601	0.49	1.252	1.21	1.228	1.133	1.155	1.169	cytoplasm,nucleus	GO:0006879 cellular iron ion homeostasis; GO:0065008 regulation of biological quality; GO:0055076 transition metal ion homeostasis; GO:0050801 ion homeostasis; GO:0030001 metal ion transport; GO:0030003 cellular cation homeostasis; GO:0098771 inorganic ion homeostasis; GO:0044763 single-organism cellular process; GO:0019725 cellular homeostasis; GO:0055072 iron ion homeostasis; GO:0044699 single-…	GO:0005623 cell;	GO:0005506 iron ion binding; GO:0008199 ferric iron binding; GO:0046914 transition metal ion binding; GO:0005488 binding; GO:0043167 ion binding; GO:0043169 cation binding; GO:0046872 metal ion binding;	K13625			IPR012347; IPR009040; IPR009078; IPR008331;	Ferritin-related; Ferritin-like diiron domain; Ferritin-like superfamily; Ferritin/DPS protein domain;
	Q28987	Cystatin-A8 OS=Sus scrofa OX=9823	1.899	Up	0.00027727	---	11.713	2.9399	19.4	2	2	2	0.454	0.525	0.45	0.871	0.928	0.915	1.576	1.681	1.626	cytoplasm	GO:0052548 regulation of endopeptidase activity; GO:0050794 regulation of cellular process; GO:0010951 negative regulation of endopeptidase activity; GO:0045861 negative regulation of proteolysis; GO:0080090 regulation of primary metabolic process; GO:0060255 regulation of macromolecule metabolic process; GO:0048523 negative regulation of cellular process; GO:0048519 negative regulation of biolog…	GO:0044424 intracellular part; GO:0005623 cell; GO:0005622 intracellular; GO:0044464 cell part; GO:0005737 cytoplasm;	GO:0030234 enzyme regulator activity; GO:0030414 peptidase inhibitor activity; GO:0061134 peptidase regulator activity; GO:0061135 endopeptidase regulator activity; GO:0004857 enzyme inhibitor activity; GO:0098772 molecular function regulator; GO:0004866 endopeptidase inhibitor activity; GO:0004869 cysteine-type endopeptidase inhibitor activity;	K13907			IPR000010;	Cystatin domain;
	P32196	Protegrin-3 OS=Sus scrofa OX=9823 GN=NPG3	1.87	Up	7.7912e-05	NPG3	16.578	44.228	68.5	10	29	1	0.665	0.683	0.615	1.209	1.189	1.273	1.144	1.082	1.154	extracellular	GO:0009605 response to external stimulus; GO:0006950 response to stress; GO:0042742 defense response to bacterium; GO:0098542 defense response to other organism; GO:0006952 defense response; GO:0043207 response to external biotic stimulus; GO:0050896 response to stimulus; GO:0051707 response to other organism; GO:0051704 multi-organism process; GO:0009617 response to bacterium; GO:0009607 respons…	GO:0005576 extracellular region;
	A0A286ZVL8	Uncharacterized protein OS=Sus scrofa OX=9823	1.863	Up	0.0060032	---	13.528	2.6429	17.5	2	16	1	0.752	0.581	0.566	1.347	1.147	1.043	1.188	1.213	1.192	extracellular	GO:0006518 peptide metabolic process; GO:0043043 peptide biosynthetic process; GO:0044267 cellular protein metabolic process; GO:0006807 nitrogen compound metabolic process; GO:0009058 biosynthetic process; GO:0043603 cellular amide metabolic process; GO:0044238 primary metabolic process; GO:1901566 organonitrogen compound biosynthetic process; GO:1901576 organic substance biosynthetic process; G…	GO:0005840 ribosome; GO:0043229 intracellular organelle; GO:0043232 intracellular non-membrane-bounded organelle; GO:0044446 intracellular organelle part; GO:0005737 cytoplasm; GO:0032991 macromolecular complex; GO:0044424 intracellular part; GO:0005623 cell; GO:0044422 organelle part; GO:0043228 non-membrane-bounded organelle; GO:0043226 organelle; GO:0015934 large ribosomal subunit; GO:0044391 …	GO:0003735 structural constituent of ribosome; GO:0005198 structural molecule activity;
	P79378	Metallothionein-1F OS=Sus scrofa OX=9823 GN=MT1F	1.852	Up	0.0148551	MT1F	5.9551	6.9845	34.4	3	3	2	0.576	0.794	0.477	1.235	1.06	1.125	0.896	1.499	1.283	extracellular	GO:0051716 cellular response to stimulus; GO:0045926 negative regulation of growth; GO:0040008 regulation of growth; GO:0048519 negative regulation of biological process; GO:0050896 response to stimulus; GO:0010038 response to metal ion; GO:0050789 regulation of biological process; GO:0042221 response to chemical; GO:0071294 cellular response to zinc ion; GO:0010043 response to zinc ion; GO:00712…	GO:0043226 organelle; GO:0043231 intracellular membrane-bounded organelle; GO:0043229 intracellular organelle; GO:0005634 nucleus; GO:0044464 cell part; GO:0005622 intracellular; GO:0005737 cytoplasm; GO:0048471 perinuclear region of cytoplasm; GO:0044424 intracellular part; GO:0043227 membrane-bounded organelle; GO:0005623 cell; GO:0044444 cytoplasmic part;	GO:0046872 metal ion binding; GO:0043169 cation binding; GO:0008270 zinc ion binding; GO:0046914 transition metal ion binding; GO:0005488 binding; GO:0043167 ion binding;	K14739			IPR023587; IPR017854;	Metallothionein domain, vertebrate; Metallothionein domain;
	F1SH92	Inter-alpha-trypsin inhibitor heavy chain H4 OS=Sus scrofa OX=9823 GN=ITIH4	1.718	Up	0.00085673	ITIH4	100.36	-2	35.3	29	64	1	0.648	0.568	0.675	1.022	1.091	1.136	1.34	1.311	1.229	extracellular	GO:1903510 mucopolysaccharide metabolic process; GO:0006950 response to stress; GO:0034097 response to cytokine; GO:0006807 nitrogen compound metabolic process; GO:0010033 response to organic substance; GO:0050896 response to stimulus; GO:0030203 glycosaminoglycan metabolic process; GO:0071704 organic substance metabolic process; GO:0008152 metabolic process; GO:0042221 response to chemical; GO:0…	GO:0016020 membrane; GO:0005615 extracellular space; GO:0044421 extracellular region part; GO:0071944 cell periphery; GO:0005737 cytoplasm; GO:0031982 vesicle; GO:0044424 intracellular part; GO:0005623 cell; GO:0005576 extracellular region; GO:0005886 plasma membrane; GO:0043226 organelle; GO:0070062 extracellular exosome; GO:0072562 blood microparticle; GO:0005622 intracellular; GO:0044464 cell …	GO:0004867 serine-type endopeptidase inhibitor activity; GO:0030234 enzyme regulator activity; GO:0030414 peptidase inhibitor activity; GO:0061134 peptidase regulator activity; GO:0061135 endopeptidase regulator activity; GO:0098772 molecular function regulator; GO:0004857 enzyme inhibitor activity; GO:0004866 endopeptidase inhibitor activity;				IPR010600; IPR013694; IPR002035;	Inter-alpha-trypsin inhibitor heavy chain, C-terminal; VIT domain; von Willebrand factor, type A;
	I3LBA6	Transglutaminase 3 OS=Sus scrofa OX=9823 GN=TGM3	1.709	Up	8.0463e-05	TGM3	84.146	52.087	12.4	9	14	9	0.686	0.627	0.628	1.088	1.093	1.136	1.161	1.283	1.273	mitochondria	GO:0008152 metabolic process; GO:0044260 cellular macromolecule metabolic process; GO:0044267 cellular protein metabolic process; GO:0018149 peptide cross-linking; GO:0006464 cellular protein modification process; GO:0043170 macromolecule metabolic process; GO:0019538 protein metabolic process; GO:0036211 protein modification process; GO:0043412 macromolecule modification; GO:0044238 primary meta…		GO:0016746 transferase activity, transferring acyl groups; GO:0003824 catalytic activity; GO:0016740 transferase activity; GO:0003810 protein-glutamine gamma-glutamyltransferase activity; GO:0016755 transferase activity, transferring amino-acyl groups;	K05620			IPR008958; IPR013783; IPR002931; IPR014756; IPR001102;	Transglutaminase, C-terminal; Immunoglobulin-like fold; Transglutaminase-like; Immunoglobulin E-set; Transglutaminase, N-terminal;
	C3S7K5	Protein S100 OS=Sus scrofa OX=9823 GN=S100A8	1.707	Up	0.000143859	S100A8	10.416	35.805	46.1	7	20	7	0.679	0.65	0.627	1.071	1.087	1.18	1.249	1.265	1.247	cytoplasm	GO:0010941 regulation of cell death; GO:0032270 positive regulation of cellular protein metabolic process; GO:0070486 leukocyte aggregation; GO:0002793 positive regulation of peptide secretion; GO:0006914 autophagy; GO:0031347 regulation of defense response; GO:0044237 cellular metabolic process; GO:0022610 biological adhesion; GO:0009605 response to external stimulus; GO:0008152 metabolic proces…	GO:0043229 intracellular organelle; GO:0005615 extracellular space; GO:0044421 extracellular region part; GO:0043232 intracellular non-membrane-bounded organelle; GO:0031982 vesicle; GO:0044424 intracellular part; GO:0005623 cell; GO:0005576 extracellular region; GO:0043228 non-membrane-bounded organelle; GO:0005856 cytoskeleton; GO:0043226 organelle; GO:0070062 extracellular exosome; GO:0043231 …	GO:0036041 long-chain fatty acid binding; GO:0005102 receptor binding; GO:0050544 arachidonic acid binding; GO:0043167 ion binding; GO:0050543 icosatetraenoic acid binding; GO:0035325 Toll-like receptor binding; GO:0015631 tubulin binding; GO:0043177 organic acid binding; GO:0005515 protein binding; GO:0008270 zinc ion binding; GO:0033293 monocarboxylic acid binding; GO:0008092 cytoskeletal prote…	K21127	S100A8; protein S100-A8	ssc04657 IL-17 signaling pathway - Sus scrofa (pig);	IPR002048; IPR011992; IPR013787;	EF-hand domain; EF-hand domain pair; S100/CaBP-9k-type, calcium binding, subdomain;
	I3LS74	Uncharacterized protein OS=Sus scrofa OX=9823 GN=LOC100512873	1.698	Up	0.0021632	LOC100512873	16.527	82.317	44.4	6	7	6	0.601	0.615	0.753	1.113	1.066	1.165	1.26	1.186	1.254	extracellular	GO:0050794 regulation of cellular process; GO:0060255 regulation of macromolecule metabolic process; GO:0098542 defense response to other organism; GO:1901700 response to oxygen-containing compound; GO:0006959 humoral immune response; GO:0043207 response to external biotic stimulus; GO:0048523 negative regulation of cellular process; GO:0048519 negative regulation of biological process; GO:003132…	GO:0005615 extracellular space; GO:0044421 extracellular region part; GO:0005576 extracellular region;	GO:0098772 molecular function regulator; GO:0030234 enzyme regulator activity; GO:0004857 enzyme inhibitor activity; GO:0030414 peptidase inhibitor activity; GO:0061134 peptidase regulator activity;				IPR008197;	WAP-type 'four-disulfide core' domain;
	F1SJI1	Selenocysteine lyase OS=Sus scrofa OX=9823 GN=SCLY	1.694	Up	0.00195906	SCLY	48.259	10.404	12.8	4	4	4	0.752	0.662	0.589	1.13	1.174	1.09	1.034	1.349	1.253	cytoplasm			GO:0003824 catalytic activity;	K01763			IPR015424; IPR000192; IPR015422; IPR015421;	Pyridoxal phosphate-dependent transferase; Aminotransferase class V domain; Pyridoxal phosphate-dependent transferase, major region, subdomain 2; Pyridoxal phosphate-dependent transferase, major region, subdomain 1;
	P80310	Protein S100-A12 OS=Sus scrofa OX=9823 GN=S100A12	1.681	Up	1.53065e-05	S100A12	10.745	49.738	34.8	3	16	3	0.681	0.667	0.656	1.117	1.156	1.096	1.219	1.253	1.235	cytoplasm	GO:0050794 regulation of cellular process; GO:0071466 cellular response to xenobiotic stimulus; GO:0023051 regulation of signaling; GO:1902533 positive regulation of intracellular signal transduction; GO:0098542 defense response to other organism; GO:0043207 response to external biotic stimulus; GO:0050896 response to stimulus; GO:0044237 cellular metabolic process; GO:0051707 response to other o…	GO:0043229 intracellular organelle; GO:0016020 membrane; GO:0043232 intracellular non-membrane-bounded organelle; GO:0071944 cell periphery; GO:0005737 cytoplasm; GO:0044424 intracellular part; GO:0005623 cell; GO:0005576 extracellular region; GO:0005886 plasma membrane; GO:0043228 non-membrane-bounded organelle; GO:0043226 organelle; GO:0005856 cytoskeleton; GO:0043231 intracellular membrane-bou…	GO:0050786 RAGE receptor binding; GO:0046914 transition metal ion binding; GO:0005102 receptor binding; GO:0005488 binding; GO:0043167 ion binding; GO:0046872 metal ion binding; GO:0043169 cation binding; GO:0005515 protein binding; GO:0005509 calcium ion binding; GO:0008270 zinc ion binding;				IPR011992; IPR002048; IPR013787;	EF-hand domain pair; EF-hand domain; S100/CaBP-9k-type, calcium binding, subdomain;
	C3S7K6	Calcium-binding protein A9 OS=Sus scrofa OX=9823 GN=S100A9	1.642	Up	1.66072e-05	S100A9	15.892	63.439	22.9	3	22	3	0.663	0.66	0.676	1.092	1.062	1.129	1.268	1.255	1.243	cytoplasm	GO:0065008 regulation of biological quality; GO:0010941 regulation of cell death; GO:0032270 positive regulation of cellular protein metabolic process; GO:0010608 posttranscriptional regulation of gene expression; GO:0070486 leukocyte aggregation; GO:0002793 positive regulation of peptide secretion; GO:0006914 autophagy; GO:0031347 regulation of defense response; GO:0044237 cellular metabolic pro…	GO:0043229 intracellular organelle; GO:0005615 extracellular space; GO:0044421 extracellular region part; GO:0030054 cell junction; GO:0044446 intracellular organelle part; GO:0031982 vesicle; GO:0005737 cytoplasm; GO:0031981 nuclear lumen; GO:0044424 intracellular part; GO:0005623 cell; GO:0005829 cytosol; GO:0005576 extracellular region; GO:0044422 organelle part; GO:0031974 membrane-enclosed l…	GO:0036041 long-chain fatty acid binding; GO:0005102 receptor binding; GO:0050544 arachidonic acid binding; GO:0043167 ion binding; GO:0050543 icosatetraenoic acid binding; GO:0035325 Toll-like receptor binding; GO:0015631 tubulin binding; GO:0043177 organic acid binding; GO:0005515 protein binding; GO:0008270 zinc ion binding; GO:0033293 monocarboxylic acid binding; GO:0008092 cytoskeletal prote…	K21128	S100A9; protein S100-A9	ssc04657 IL-17 signaling pathway - Sus scrofa (pig);	IPR002048; IPR011992; IPR013787;	EF-hand domain; EF-hand domain pair; S100/CaBP-9k-type, calcium binding, subdomain;
	A0A286ZWM2	Uncharacterized protein OS=Sus scrofa OX=9823 GN=LOC110256379	1.622	Up	0.0034372	LOC110256379	23.235	1.6595	4.3	1	1	1	0.583	0.729	0.733	1.056	1.133	1.129	1.221	1.202	1.219	mitochondria							IPR016040; IPR008030;	NAD(P)-binding domain; NmrA-like domain;
	P19133	Ferritin light chain (Fragment) OS=Sus scrofa OX=9823 GN=FTL	1.604	Up	0.027304	FTL	8.7839	25.635	65.4	4	9	2	0.846	0.579	0.898	1.16	1.225	1.342	1.113	1.134	0.728	cytoplasm	GO:0006879 cellular iron ion homeostasis; GO:0065008 regulation of biological quality; GO:0055076 transition metal ion homeostasis; GO:0030001 metal ion transport; GO:0030003 cellular cation homeostasis; GO:0055072 iron ion homeostasis; GO:0044699 single-organism process; GO:0006826 iron ion transport; GO:0055082 cellular chemical homeostasis; GO:0051234 establishment of localization; GO:0000041 …	GO:0070288 ferritin complex; GO:0044464 cell part; GO:0005622 intracellular; GO:0005737 cytoplasm; GO:0032991 macromolecular complex; GO:0044424 intracellular part; GO:0005623 cell; GO:0043234 protein complex; GO:0008043 intracellular ferritin complex;	GO:0005506 iron ion binding; GO:0008199 ferric iron binding; GO:0046914 transition metal ion binding; GO:0005488 binding; GO:0043167 ion binding; GO:0043169 cation binding; GO:0046872 metal ion binding;				IPR012347; IPR009040; IPR009078; IPR008331;	Ferritin-related; Ferritin-like diiron domain; Ferritin-like superfamily; Ferritin/DPS protein domain;
	A0A287BKS2	Pentraxin-related protein PTX3 precursor OS=Sus scrofa OX=9823 GN=PTX3	1.582	Up	0.00084378	PTX3	35.023	15.827	6.9	2	2	2	0.549	0.531	0.555	0.86	0.863	0.864	1.658	1.564	1.579	cytoplasm,nucleus							IPR013320;	Concanavalin A-like lectin/glucanase domain;
	F1RN76	CD5 antigen-like precursor OS=Sus scrofa OX=9823 GN=CD5L	1.569	Up	0.000122644	CD5L	59.563	52.436	17.7	5	8	5	0.73	0.75	0.796	1.2	1.152	1.22	1.002	1.111	1.037	extracellular	GO:0006810 transport; GO:0006898 receptor-mediated endocytosis; GO:0051179 localization; GO:0006897 endocytosis; GO:0051234 establishment of localization; GO:0016192 vesicle-mediated transport;	GO:0016020 membrane;	GO:0038024 cargo receptor activity; GO:0005044 scavenger receptor activity; GO:0060089 molecular transducer activity; GO:0004872 receptor activity;				IPR017448; IPR001190;	SRCR-like domain; SRCR domain;
	P12067	Lysozyme C-1 OS=Sus scrofa OX=9823	1.564	Up	0.00079545	---	14.668	49.986	56.2	8	13	8	0.655	0.628	0.575	0.911	0.993	1.002	1.451	1.407	1.333	extracellular	GO:0044707 single-multicellular organism process; GO:0019835 cytolysis; GO:0007586 digestion; GO:0006950 response to stress; GO:0042742 defense response to bacterium; GO:0098542 defense response to other organism; GO:0044699 single-organism process; GO:0043207 response to external biotic stimulus; GO:0050896 response to stimulus; GO:0051707 response to other organism; GO:0032501 multicellular org…	GO:0005576 extracellular region;	GO:0003796 lysozyme activity; GO:0004553 hydrolase activity, hydrolyzing O-glycosyl compounds; GO:0016787 hydrolase activity; GO:0003824 catalytic activity; GO:0061783 peptidoglycan muralytic activity; GO:0016798 hydrolase activity, acting on glycosyl bonds;				IPR023346;	Lysozyme-like domain;
	A0A287BM11	Uncharacterized protein OS=Sus scrofa OX=9823 GN=LOC396684	1.558	Up	0.00062306	LOC396684	45.398	41.166	31.4	14	30	4	0.662	0.745	0.723	1.091	1.06	1.168	1.245	1.28	1.114	endoplasmic reticulum				K04525			IPR023796;	Serpin domain;
	F1RRX1	Neutrophil gelatinase-associated lipocalin precursor OS=Sus scrofa OX=9823 GN=LCN2	1.556	Up	0.00049785	LCN2	22.432	22.062	32.2	6	10	6	0.81	0.726	0.778	1.145	1.192	1.263	1.041	0.992	1.039	extracellular	GO:0038034 signal transduction in absence of ligand; GO:0050794 regulation of cellular process; GO:0044700 single organism signaling; GO:0097191 extrinsic apoptotic signaling pathway; GO:0097190 apoptotic signaling pathway; GO:0007166 cell surface receptor signaling pathway; GO:0044699 single-organism process; GO:0044764 multi-organism cellular process; GO:0043207 response to external biotic stim…	GO:0070062 extracellular exosome; GO:0043226 organelle; GO:0005615 extracellular space; GO:0044421 extracellular region part; GO:0031982 vesicle; GO:1903561 extracellular vesicle; GO:0043227 membrane-bounded organelle; GO:0005576 extracellular region; GO:0043230 extracellular organelle;	GO:0005506 iron ion binding; GO:0046914 transition metal ion binding; GO:0005488 binding; GO:0043167 ion binding; GO:0046872 metal ion binding; GO:0043169 cation binding; GO:0036094 small molecule binding; GO:0005215 transporter activity;	K21129	LCN2; lipocalin 2	ssc04657 IL-17 signaling pathway - Sus scrofa (pig);	IPR000566; IPR012674; IPR011038;	Lipocalin/cytosolic fatty-acid binding domain; Calycin; Calycin-like;
	A0A287ARR1	Ferritin OS=Sus scrofa OX=9823 GN=FTH1	1.549	Up	0.00025682	FTH1	21.185	70.956	61.3	9	30	9	0.703	0.756	0.72	1.094	1.091	1.19	1.091	1.144	1.074	cytoplasm,nucleus	GO:0006879 cellular iron ion homeostasis; GO:0065008 regulation of biological quality; GO:0055076 transition metal ion homeostasis; GO:0050801 ion homeostasis; GO:0030003 cellular cation homeostasis; GO:0098771 inorganic ion homeostasis; GO:0044763 single-organism cellular process; GO:0019725 cellular homeostasis; GO:0055072 iron ion homeostasis; GO:0044699 single-organism process; GO:0055082 cel…		GO:0043169 cation binding; GO:0046872 metal ion binding; GO:0005506 iron ion binding; GO:0008199 ferric iron binding; GO:0046914 transition metal ion binding; GO:0005488 binding; GO:0043167 ion binding;				IPR012347; IPR009040; IPR009078; IPR008331;	Ferritin-related; Ferritin-like diiron domain; Ferritin-like superfamily; Ferritin/DPS protein domain;
	F1RRP1	Myeloperoxidase OS=Sus scrofa OX=9823 GN=MPO	1.538	Up	0.00163796	MPO	80.379	48.654	14.2	11	16	9	0.752	0.821	0.703	1.114	1.138	1.249	1.031	1.05	1.131	extracellular	GO:1903409 reactive oxygen species biosynthetic process; GO:0044711 single-organism biosynthetic process; GO:0006950 response to stress; GO:0055114 oxidation-reduction process; GO:0044281 small molecule metabolic process; GO:0009636 response to toxic substance; GO:0044763 single-organism cellular process; GO:0044699 single-organism process; GO:0009058 biosynthetic process; GO:0002149 hypochlorous…		GO:0097159 organic cyclic compound binding; GO:1901363 heterocyclic compound binding; GO:0020037 heme binding; GO:0003824 catalytic activity; GO:0005488 binding; GO:0016209 antioxidant activity; GO:0004601 peroxidase activity; GO:0046906 tetrapyrrole binding; GO:0016491 oxidoreductase activity; GO:0016684 oxidoreductase activity, acting on peroxide as acceptor;	K10789
	A0A287AJA7	Elongation of very long chain fatty acids protein 1 OS=Sus scrofa OX=9823 GN=ELOVL1	1.511	Up	0.00060331	ELOVL1	32.46	5.5553	4.3	1	1	1	0.75	0.726	0.827	1.136	1.147	1.196	1.085	1.072	1.074	plasma membrane	GO:0044711 single-organism biosynthetic process; GO:0016053 organic acid biosynthetic process; GO:0044281 small molecule metabolic process; GO:0044763 single-organism cellular process; GO:0044699 single-organism process; GO:0009058 biosynthetic process; GO:0044255 cellular lipid metabolic process; GO:0006631 fatty acid metabolic process; GO:0044238 primary metabolic process; GO:0006633 fatty acid…	GO:0016020 membrane; GO:0043229 intracellular organelle; GO:0005783 endoplasmic reticulum; GO:0005737 cytoplasm; GO:0031224 intrinsic component of membrane; GO:0012505 endomembrane system; GO:0044424 intracellular part; GO:0005623 cell; GO:0016021 integral component of membrane; GO:0043231 intracellular membrane-bounded organelle; GO:0043226 organelle; GO:0005622 intracellular; GO:0044464 cell pa…	GO:0009922 fatty acid elongase activity; GO:0016746 transferase activity, transferring acyl groups; GO:0003824 catalytic activity; GO:0016740 transferase activity; GO:0016747 transferase activity, transferring acyl groups other than amino-acyl groups; GO:0004312 fatty acid synthase activity;	K10247
	F1S6S9	Proteinase 3 OS=Sus scrofa OX=9823 GN=PRTN3	1.491	Up	0.000119572	PRTN3	29.084	28.996	12.3	3	8	3	0.738	0.722	0.788	1.127	1.12	1.105	1.059	1.129	1.08	extracellular	GO:0050794 regulation of cellular process; GO:0060627 regulation of vesicle-mediated transport; GO:0044707 single-multicellular organism process; GO:0051129 negative regulation of cellular component organization; GO:0048869 cellular developmental process; GO:0044699 single-organism process; GO:0048519 negative regulation of biological process; GO:0048523 negative regulation of cellular process; G…	GO:0016020 membrane; GO:0005615 extracellular space; GO:0044421 extracellular region part; GO:0071944 cell periphery; GO:0005737 cytoplasm; GO:0031982 vesicle; GO:0044424 intracellular part; GO:0005623 cell; GO:0005829 cytosol; GO:0005576 extracellular region; GO:0005886 plasma membrane; GO:0043226 organelle; GO:0070062 extracellular exosome; GO:0031012 extracellular matrix; GO:0005622 intracellu…	GO:0004252 serine-type endopeptidase activity; GO:0004175 endopeptidase activity; GO:0008233 peptidase activity; GO:0003824 catalytic activity; GO:0017171 serine hydrolase activity; GO:0005488 binding; GO:0008236 serine-type peptidase activity; GO:0070011 peptidase activity, acting on L-amino acid peptides; GO:0005515 protein binding; GO:0016787 hydrolase activity; GO:0019899 enzyme binding;	K01350			IPR009003; IPR001254;	Peptidase S1, PA clan; Serine proteases, trypsin domain;
	A0A287AQG3	MHC class I antigen 2 precursor OS=Sus scrofa OX=9823 GN=LOC100513601	1.473	Up	3.9937e-05	LOC100513601	39.979	222.06	39.9	10	33	4	0.751	0.789	0.754	1.153	1.111	1.115	1.118	1.115	1.104	extracellular	GO:0019882 antigen processing and presentation; GO:0002376 immune system process; GO:0006955 immune response; GO:0050896 response to stimulus;		GO:0005515 protein binding; GO:0005488 binding;	K06751			IPR007110; IPR013783; IPR010579; IPR011161; IPR011162; IPR001039; IPR003597;	Immunoglobulin-like domain; Immunoglobulin-like fold; MHC class I, alpha chain, C-terminal; MHC class I-like antigen recognition-like; MHC classes I/II-like antigen recognition protein; MHC class I alpha chain, alpha1 alpha2 domains; Immunoglobulin C1-set;
	A0A287A830	Pentaxin OS=Sus scrofa OX=9823 GN=CRP	1.461	Up	0.00020199	CRP	22.546	21.59	16	3	4	3	0.64	0.683	0.702	0.973	0.979	1.006	1.33	1.365	1.338	cytoplasm							IPR013320;	Concanavalin A-like lectin/glucanase domain;
	A0A286ZXH8	"Elastase, neutrophil expressed OS=Sus scrofa OX=9823 GN=ELANE"	1.415	Up	0.0194187	ELANE	27.438	48.525	18	3	6	3	0.964	0.719	0.779	1.222	1.17	1.091	0.971	1.049	1.073	extracellular	GO:0006508 proteolysis; GO:0008152 metabolic process; GO:0043170 macromolecule metabolic process; GO:0019538 protein metabolic process; GO:0044238 primary metabolic process; GO:0071704 organic substance metabolic process;		GO:0004252 serine-type endopeptidase activity; GO:0004175 endopeptidase activity; GO:0008233 peptidase activity; GO:0003824 catalytic activity; GO:0017171 serine hydrolase activity; GO:0008236 serine-type peptidase activity; GO:0070011 peptidase activity, acting on L-amino acid peptides; GO:0016787 hydrolase activity;				IPR009003; IPR001254;	Peptidase S1, PA clan; Serine proteases, trypsin domain;
	P49932	Antibacterial peptide PMAP-37 OS=Sus scrofa OX=9823 GN=PMAP37	1.407	Up	2.3195e-05	PMAP37	18.927	4.5882	38.3	9	26	3	0.895	0.879	0.918	1.249	1.286	1.252	0.827	0.845	0.764	extracellular	GO:0009605 response to external stimulus; GO:0006950 response to stress; GO:0042742 defense response to bacterium; GO:0098542 defense response to other organism; GO:0006952 defense response; GO:0043207 response to external biotic stimulus; GO:0050896 response to stimulus; GO:0051707 response to other organism; GO:0051704 multi-organism process; GO:0009617 response to bacterium; GO:0009607 respons…	GO:0005576 extracellular region;					IPR022746;	Cathelicidin, antimicrobial peptide, C-terminal;
	Q29599	2'-5'-oligoadenylate synthase 1 OS=Sus scrofa OX=9823 GN=OAS1	1.406	Up	0.00041993	OAS1	40.246	51.587	33.8	10	13	10	0.787	0.856	0.777	1.123	1.125	1.155	1.043	1.097	1.06	cytoplasm	GO:0009117 nucleotide metabolic process; GO:0098542 defense response to other organism; GO:0044699 single-organism process; GO:0009058 biosynthetic process; GO:0044764 multi-organism cellular process; GO:0044237 cellular metabolic process; GO:0006796 phosphate-containing compound metabolic process; GO:0009607 response to biotic stimulus; GO:0009605 response to external stimulus; GO:0008152 metabo…	GO:0043229 intracellular organelle; GO:0005783 endoplasmic reticulum; GO:0005737 cytoplasm; GO:0012505 endomembrane system; GO:0044424 intracellular part; GO:0005623 cell; GO:0005576 extracellular region; GO:0005739 mitochondrion; GO:0043231 intracellular membrane-bounded organelle; GO:0043226 organelle; GO:0005634 nucleus; GO:0005622 intracellular; GO:0044464 cell part; GO:0043227 membrane-bound…	GO:1901265 nucleoside phosphate binding; GO:1901363 heterocyclic compound binding; GO:0097159 organic cyclic compound binding; GO:0003824 catalytic activity; GO:0032553 ribonucleotide binding; GO:0005488 binding; GO:0032550 purine ribonucleoside binding; GO:0043169 cation binding; GO:0043168 anion binding; GO:0032559 adenyl ribonucleotide binding; GO:0030554 adenyl nucleotide binding; GO:0016740 …	K14216			IPR002934; IPR018952; IPR006116;	Polymerase, nucleotidyl transferase domain; 2'-5'-oligoadenylate synthetase 1, domain 2/C-terminal; 2-5-oligoadenylate synthetase, N-terminal;
	F1RXK4	FERM and PDZ domain containing 3 OS=Sus scrofa OX=9823 GN=FRMPD3	1.393	Up	0.0048184	FRMPD3	178.22	-2	0.7	1	1	1	0.763	0.908	0.852	1.156	1.12	1.239	1.084	0.976	0.907	nucleus		GO:0005856 cytoskeleton; GO:0043226 organelle; GO:0043229 intracellular organelle; GO:0043232 intracellular non-membrane-bounded organelle; GO:0044464 cell part; GO:0005622 intracellular; GO:0044424 intracellular part; GO:0005623 cell; GO:0043228 non-membrane-bounded organelle;					IPR019749; IPR019748; IPR029071; IPR011993; IPR000299; IPR014352;	Band 4.1 domain; FERM central domain; Ubiquitin-related domain; PH domain-like; FERM domain; FERM/acyl-CoA-binding protein, 3-helical bundle;
	A0A286ZID0	Serine dehydratase like OS=Sus scrofa OX=9823 GN=SDSL	1.368	Up	0.00101588	SDSL	35.485	2.1349	3.6	1	1	1	0.874	0.776	0.85	1.125	1.141	1.153	0.91	1.015	1.174	cytoplasm	GO:0044281 small molecule metabolic process; GO:0044763 single-organism cellular process; GO:0006807 nitrogen compound metabolic process; GO:0044699 single-organism process; GO:0044238 primary metabolic process; GO:0044237 cellular metabolic process; GO:0071704 organic substance metabolic process; GO:0008152 metabolic process; GO:0006520 cellular amino acid metabolic process; GO:0044710 single-or…		GO:0097159 organic cyclic compound binding; GO:1901363 heterocyclic compound binding; GO:0005488 binding; GO:0043167 ion binding; GO:0043168 anion binding; GO:0048037 cofactor binding; GO:0030170 pyridoxal phosphate binding;	K17989			IPR001926;	Tryptophan synthase beta subunit-like PLP-dependent enzyme;
	I3L8X6	Amphiphysin OS=Sus scrofa OX=9823 GN=AMPH	1.359	Up	0.0001184	AMPH	74.481	20.722	13.1	7	10	5	0.854	0.861	0.9	1.186	1.158	1.209	1.03	0.907	0.903	cytoplasm		GO:0016020 membrane; GO:0031252 cell leading edge; GO:0044459 plasma membrane part; GO:0031256 leading edge membrane; GO:0005622 intracellular; GO:0044425 membrane part; GO:0044464 cell part; GO:0071944 cell periphery; GO:0005737 cytoplasm; GO:0044424 intracellular part; GO:0005623 cell; GO:0005886 plasma membrane;	GO:0008289 lipid binding; GO:0043168 anion binding; GO:0005515 protein binding; GO:0005488 binding; GO:0005543 phospholipid binding; GO:0043167 ion binding;	K12562			IPR001452; IPR027267; IPR004148;	SH3 domain; Arfaptin homology (AH) domain/BAR domain; BAR domain;
	Q5ISC6	Heme-binding protein 1 OS=Sus scrofa OX=9823 GN=HEBP1	1.357	Up	0.000102176	HEBP1	21.07	161.45	65.6	11	39	11	0.836	0.887	0.864	1.163	1.154	1.193	0.962	0.989	0.972	cytoplasm		GO:0044424 intracellular part; GO:0005623 cell; GO:0044464 cell part; GO:0005622 intracellular; GO:0005737 cytoplasm;	GO:0097159 organic cyclic compound binding; GO:1901363 heterocyclic compound binding; GO:0020037 heme binding; GO:0046906 tetrapyrrole binding; GO:0005488 binding;				IPR011256;	Regulatory factor, effector binding domain;
	P14460	Fibrinogen alpha chain (Fragment) OS=Sus scrofa OX=9823 GN=FGA	1.342	Up	0.0002243	FGA	1.7619	30.903	100	2	3	1	0.881	0.844	0.89	1.209	1.153	1.147	0.983	1.038	0.872		GO:0044707 single-multicellular organism process; GO:0007596 blood coagulation; GO:0065008 regulation of biological quality; GO:0050878 regulation of body fluid levels; GO:0006950 response to stress; GO:0044699 single-organism process; GO:0002376 immune system process; GO:0050896 response to stimulus; GO:0032501 multicellular organismal process; GO:0045087 innate immune response; GO:0007599 hemos…	GO:0005576 extracellular region;
	K7GKN2	Interferon-induced GTP-binding protein Mx1 OS=Sus scrofa OX=9823 GN=MX1	1.338	Up	0.005119	MX1	75.4	211.55	35.6	23	59	2	0.874	0.865	0.764	1.094	1.072	1.182	1.006	1.042	1.093	cytoplasm,nucleus	GO:0044085 cellular component biogenesis; GO:0098542 defense response to other organism; GO:0044699 single-organism process; GO:1901252 regulation of intracellular transport of viral material; GO:0044764 multi-organism cellular process; GO:1901253 negative regulation of intracellular transport of viral material; GO:0071345 cellular response to cytokine stimulus; GO:0009607 response to biotic stim…	GO:0016020 membrane; GO:0043229 intracellular organelle; GO:0044429 mitochondrial part; GO:0031090 organelle membrane; GO:0005635 nuclear envelope; GO:0044446 intracellular organelle part; GO:0031967 organelle envelope; GO:0005737 cytoplasm; GO:0012505 endomembrane system; GO:0044424 intracellular part; GO:0005623 cell; GO:0005829 cytosol; GO:0005739 mitochondrion; GO:0044422 organelle part; GO:0…	GO:1901265 nucleoside phosphate binding; GO:0016817 hydrolase activity, acting on acid anhydrides; GO:0016787 hydrolase activity; GO:0005515 protein binding; GO:1901363 heterocyclic compound binding; GO:0097159 organic cyclic compound binding; GO:0042802 identical protein binding; GO:0008092 cytoskeletal protein binding; GO:0016462 pyrophosphatase activity; GO:0032553 ribonucleotide binding; GO:0…	K14754			IPR030381; IPR003130; IPR027417; IPR001401; IPR020850; IPR000375;	Dynamin-type guanine nucleotide-binding (G) domain; Dynamin GTPase effector; P-loop containing nucleoside triphosphate hydrolase; Dynamin, GTPase domain; GTPase effector domain; Dynamin central domain;
	A0A287AVA9	Uncharacterized protein OS=Sus scrofa OX=9823 GN=LOC100153899	1.337	Up	0.0041413	LOC100153899	46.968	34.5	20.6	8	23	2	0.746	0.726	0.822	0.979	1.001	1.087	1.22	1.175	1.298	endoplasmic reticulum				K04525			IPR023796;	Serpin domain;
	A0A286ZLA5	Nuclear receptor coactivator 2 OS=Sus scrofa OX=9823 GN=NCOA2	1.332	Up	0.0153191	NCOA2	148.65	6.2523	2.1	3	3	3	0.855	0.793	0.93	1.07	1.268	1.095	0.922	1.068	1.013	nucleus	GO:0050794 regulation of cellular process; GO:0010468 regulation of gene expression; GO:0006355 regulation of transcription, DNA-templated; GO:0031326 regulation of cellular biosynthetic process; GO:0080090 regulation of primary metabolic process; GO:0060255 regulation of macromolecule metabolic process; GO:0019219 regulation of nucleobase-containing compound metabolic process; GO:0010556 regulat…	GO:0043226 organelle; GO:0043231 intracellular membrane-bounded organelle; GO:0043229 intracellular organelle; GO:0005634 nucleus; GO:0044464 cell part; GO:0005622 intracellular; GO:0044424 intracellular part; GO:0043227 membrane-bounded organelle; GO:0005623 cell;	GO:0030374 ligand-dependent nuclear receptor transcription coactivator activity; GO:0005102 receptor binding; GO:0005488 binding; GO:0046983 protein dimerization activity; GO:0035257 nuclear hormone receptor binding; GO:0000989 transcription factor activity, transcription factor binding; GO:0005515 protein binding; GO:0003713 transcription coactivator activity; GO:0051427 hormone receptor binding…				IPR014920; IPR009110; IPR013767; IPR000014; IPR011598; IPR010011; IPR014935; IPR032565;	Nuclear receptor coactivator, Ncoa-type, interlocking; Nuclear receptor coactivator, interlocking; PAS fold; PAS domain; Myc-type, basic helix-loop-helix (bHLH) domain; Domain of unknown function DUF1518; Nuclear receptor coactivator, receptor-binding domain; Domain of unknown function DUF4927;
	A0A287B242	Uncharacterized protein OS=Sus scrofa OX=9823 GN=FLNA	1.332	Up	0.037558	FLNA	234.37	19.408	51.2	96	397	1	0.833	0.766	0.803	1.211	0.897	1.091	1.106	1.066	1.248	cytoplasm			GO:0005515 protein binding; GO:0005488 binding;				IPR013783; IPR014756; IPR001715;	Immunoglobulin-like fold; Immunoglobulin E-set; Calponin homology domain;
	P27594	Interferon-induced GTP-binding protein Mx1 OS=Sus scrofa OX=9823 GN=MX1	1.324	Up	0.0101977	MX1	75.586	1.8733	33	22	52	1	0.804	0.866	0.873	1.177	1.003	1.188	1.044	1.041	1.018	cytoplasm	GO:0044085 cellular component biogenesis; GO:0098542 defense response to other organism; GO:0044699 single-organism process; GO:1901252 regulation of intracellular transport of viral material; GO:0044764 multi-organism cellular process; GO:1901253 negative regulation of intracellular transport of viral material; GO:0071345 cellular response to cytokine stimulus; GO:0009607 response to biotic stim…	GO:0043229 intracellular organelle; GO:0016020 membrane; GO:0042175 nuclear outer membrane-endoplasmic reticulum membrane network; GO:0005783 endoplasmic reticulum; GO:0044429 mitochondrial part; GO:0031090 organelle membrane; GO:0031967 organelle envelope; GO:0044446 intracellular organelle part; GO:0005737 cytoplasm; GO:0012505 endomembrane system; GO:0044424 intracellular part; GO:0005623 cell…	GO:1901265 nucleoside phosphate binding; GO:0016817 hydrolase activity, acting on acid anhydrides; GO:0016787 hydrolase activity; GO:0005515 protein binding; GO:1901363 heterocyclic compound binding; GO:0097159 organic cyclic compound binding; GO:0008092 cytoskeletal protein binding; GO:0016462 pyrophosphatase activity; GO:0032553 ribonucleotide binding; GO:0003824 catalytic activity; GO:0005488 …	K14754			IPR030381; IPR003130; IPR001401; IPR020850; IPR027417; IPR000375;	Dynamin-type guanine nucleotide-binding (G) domain; Dynamin GTPase effector; Dynamin, GTPase domain; GTPase effector domain; P-loop containing nucleoside triphosphate hydrolase; Dynamin central domain;
	G9BFU1	Signal transducer and activator of transcription OS=Sus scrofa OX=9823 GN=STAT1	1.307	Up	0.0023004	STAT1	83.016	2.7557	51	37	117	1	0.929	0.847	0.925	1.133	1.165	1.231	0.825	1.014	0.952	cytoplasm,nucleus	GO:0050794 regulation of cellular process; GO:0044700 single organism signaling; GO:0006725 cellular aromatic compound metabolic process; GO:0097659 nucleic acid-templated transcription; GO:0060255 regulation of macromolecule metabolic process; GO:0019219 regulation of nucleobase-containing compound metabolic process; GO:0044699 single-organism process; GO:0009058 biosynthetic process; GO:0050896…	GO:0043226 organelle; GO:0043231 intracellular membrane-bounded organelle; GO:0043229 intracellular organelle; GO:0005634 nucleus; GO:0044464 cell part; GO:0005622 intracellular; GO:0005737 cytoplasm; GO:0044424 intracellular part; GO:0043227 membrane-bounded organelle; GO:0005623 cell;	GO:0097159 organic cyclic compound binding; GO:1901363 heterocyclic compound binding; GO:0003677 DNA binding; GO:0005488 binding; GO:0001071 nucleic acid binding transcription factor activity; GO:0003676 nucleic acid binding; GO:0004871 signal transducer activity; GO:0003700 transcription factor activity, sequence-specific DNA binding;				IPR013801; IPR000980; IPR012345; IPR008967; IPR013799; IPR011992; IPR013800; IPR015988;	STAT transcription factor, DNA-binding; SH2 domain; STAT transcription factor, DNA-binding, subdomain; p53-like transcription factor, DNA-binding; STAT transcription factor, protein interaction; EF-hand domain pair; STAT transcription factor, all-alpha domain; STAT transcription factor, coiled coil;
	F1S4U2	GDNF family receptor alpha OS=Sus scrofa OX=9823 GN=GFRA1	1.304	Up	0.025543	GFRA1	51.193	8.5136	4.8	2	3	2	0.773	0.889	0.87	1.106	1.102	1.094	1.036	1.053	1.087	plasma membrane			GO:0060089 molecular transducer activity; GO:0004872 receptor activity;	K19895			IPR016017;	GDNF/GAS1;
	Q764N2	T-cell surface glycoprotein CD3 delta chain OS=Sus scrofa OX=9823 GN=CD3D	1.304	Up	0.0141034	CD3D	19.475	3.1425	10.5	2	2	2	0.796	0.853	0.983	1.183	1.116	1.132	1.06	0.905	0.974	extracellular	GO:0044700 single organism signaling; GO:0045321 leukocyte activation; GO:0007166 cell surface receptor signaling pathway; GO:0048869 cellular developmental process; GO:0009891 positive regulation of biosynthetic process; GO:0044699 single-organism process; GO:0042110 T cell activation; GO:2001141 regulation of RNA biosynthetic process; GO:0007165 signal transduction; GO:0007154 cell communicatio…	GO:0042101 T cell receptor complex; GO:0016020 membrane; GO:0044459 plasma membrane part; GO:0042105 alpha-beta T cell receptor complex; GO:0044425 membrane part; GO:0044464 cell part; GO:0071944 cell periphery; GO:0098802 plasma membrane receptor complex; GO:0043235 receptor complex; GO:0031224 intrinsic component of membrane; GO:0032991 macromolecular complex; GO:0005623 cell; GO:0016021 integr…	GO:0038023 signaling receptor activity; GO:0060089 molecular transducer activity; GO:0004872 receptor activity; GO:0046982 protein heterodimerization activity; GO:0005488 binding; GO:0046983 protein dimerization activity; GO:0000989 transcription factor activity, transcription factor binding; GO:0005515 protein binding; GO:0003713 transcription coactivator activity; GO:0004888 transmembrane signa…	K06450			IPR007110; IPR013783; IPR032052;	Immunoglobulin-like domain; Immunoglobulin-like fold; CD3 gamma/delta subunit, Ig-like domain;
	K7GPW1	Uncharacterized protein OS=Sus scrofa OX=9823 GN=CFI	0.768	Down	0.0031248	CFI	61.337	31.315	14	7	11	7	1.232	1.142	1.183	0.852	0.962	0.918	0.91	0.967	0.853	extracellular	GO:0006810 transport; GO:0008152 metabolic process; GO:0016192 vesicle-mediated transport; GO:0006508 proteolysis; GO:0019538 protein metabolic process; GO:0043170 macromolecule metabolic process; GO:0006898 receptor-mediated endocytosis; GO:0051179 localization; GO:0006897 endocytosis; GO:0044238 primary metabolic process; GO:0051234 establishment of localization; GO:0071704 organic substance me…	GO:0016020 membrane; GO:0005615 extracellular space; GO:0044421 extracellular region part; GO:0005576 extracellular region;	GO:0004252 serine-type endopeptidase activity; GO:0004175 endopeptidase activity; GO:0060089 molecular transducer activity; GO:0008233 peptidase activity; GO:0004872 receptor activity; GO:0003824 catalytic activity; GO:0017171 serine hydrolase activity; GO:0005488 binding; GO:0008236 serine-type peptidase activity; GO:0038024 cargo receptor activity; GO:0070011 peptidase activity, acting on L-ami…				IPR009003; IPR003884; IPR017448; IPR002350; IPR001190; IPR001254;	Peptidase S1, PA clan; Factor I / membrane attack complex; SRCR-like domain; Kazal domain; SRCR domain; Serine proteases, trypsin domain;
	A0A287BGF6	Uncharacterized protein OS=Sus scrofa OX=9823 GN=LOC100515837	0.767	Down	0.00130044	LOC100515837	29.141	75.81	26.6	4	4	4	1.148	1.138	1.195	0.895	0.932	0.842	0.96	0.997	0.907	extracellular			GO:0005515 protein binding; GO:0005488 binding;				IPR007110; IPR013783;	Immunoglobulin-like domain; Immunoglobulin-like fold;
	A0A287AAD5	Alpha-1B-glycoprotein OS=Sus scrofa OX=9823 GN=A1BG	0.765	Down	0.00033816	A1BG	53.266	24.225	18.6	9	15	9	1.146	1.2	1.227	0.923	0.922	0.89	0.93	0.909	0.838	cytoplasm,nucleus			GO:0005515 protein binding; GO:0005488 binding;				IPR003598; IPR007110; IPR013783; IPR003599;	Immunoglobulin subtype 2; Immunoglobulin-like domain; Immunoglobulin-like fold; Immunoglobulin subtype;
	F1SCD0	Uncharacterized protein OS=Sus scrofa OX=9823 GN=LOC100153899	0.765	Down	0.0063	LOC100153899	46.64	131.01	31.9	14	34	3	1.166	1.171	1.341	0.93	0.906	0.976	0.812	0.845	0.77	endoplasmic reticulum	GO:0050794 regulation of cellular process; GO:0052548 regulation of endopeptidase activity; GO:0010951 negative regulation of endopeptidase activity; GO:0045861 negative regulation of proteolysis; GO:0080090 regulation of primary metabolic process; GO:0060255 regulation of macromolecule metabolic process; GO:0030162 regulation of proteolysis; GO:0031324 negative regulation of cellular metabolic p…	GO:0005615 extracellular space; GO:0044421 extracellular region part; GO:0005576 extracellular region;	GO:0004867 serine-type endopeptidase inhibitor activity; GO:0030234 enzyme regulator activity; GO:0030414 peptidase inhibitor activity; GO:0061134 peptidase regulator activity; GO:0061135 endopeptidase regulator activity; GO:0098772 molecular function regulator; GO:0004857 enzyme inhibitor activity; GO:0004866 endopeptidase inhibitor activity;	K04525			IPR023796;	Serpin domain;
	F1S847	Internexin neuronal intermediate filament protein alpha OS=Sus scrofa OX=9823 GN=INA	0.762	Down	0.00162349	INA	55.391	19.334	15.2	8	20	6	1.085	0.967	1.022	0.774	0.801	0.767	1.189	1.16	1.158	nucleus	GO:0007399 nervous system development; GO:0032502 developmental process; GO:0016043 cellular component organization; GO:0044707 single-multicellular organism process; GO:0030901 midbrain development; GO:0045104 intermediate filament cytoskeleton organization; GO:0007420 brain development; GO:0048731 system development; GO:0045103 intermediate filament-based process; GO:0044763 single-organism cel…	GO:0016020 membrane; GO:0005615 extracellular space; GO:0044421 extracellular region part; GO:0031090 organelle membrane; GO:0005737 cytoplasm; GO:0032991 macromolecular complex; GO:0099512 supramolecular fiber; GO:0044424 intracellular part; GO:0099080 supramolecular complex; GO:0005623 cell; GO:0036464 cytoplasmic ribonucleoprotein granule; GO:0044422 organelle part; GO:0043228 non-membrane-bou…	GO:0005198 structural molecule activity;	K07608			IPR006821;	Intermediate filament head, DNA-binding domain;
[truncated: 321 more rows]

## Sheet: Table S3
Protein accession	Protein description	Gene name	MW [kDa]	SR/SC Ratio	SR/SC P value	SS/SC Ratio	SS/SC P value	SS/SR Ratio	SS/SR P value
[truncated: 424 more rows]

[truncated: 3 more sheets: Table S4, Table S5, Table S6]
